# Supplementary material for: Molecular characteristics and spatial distribution of adult human corneal cell subtypes
Source: PubMed Central journal article supplement (PMC8357950; doi:10.1038/s41598-021-94933-8), 2021-08-11
Supplement: 41598_2021_94933_MOESM1_ESM.pdf [file 41598_2021_94933_MOESM1_ESM.pdf]

# Supplementary File

## **Molecular characteristics and spatial distribution of adult human corneal cell subtypes**

Ann J Ligocki, Wen Fury, Christian Gutierrez, Christina Adler, Tao Yang, Min Ni, Yu Bai, Yi Wei, Guillermo L Lehmann, Carmelo Romano

Supplementary Figure 1.

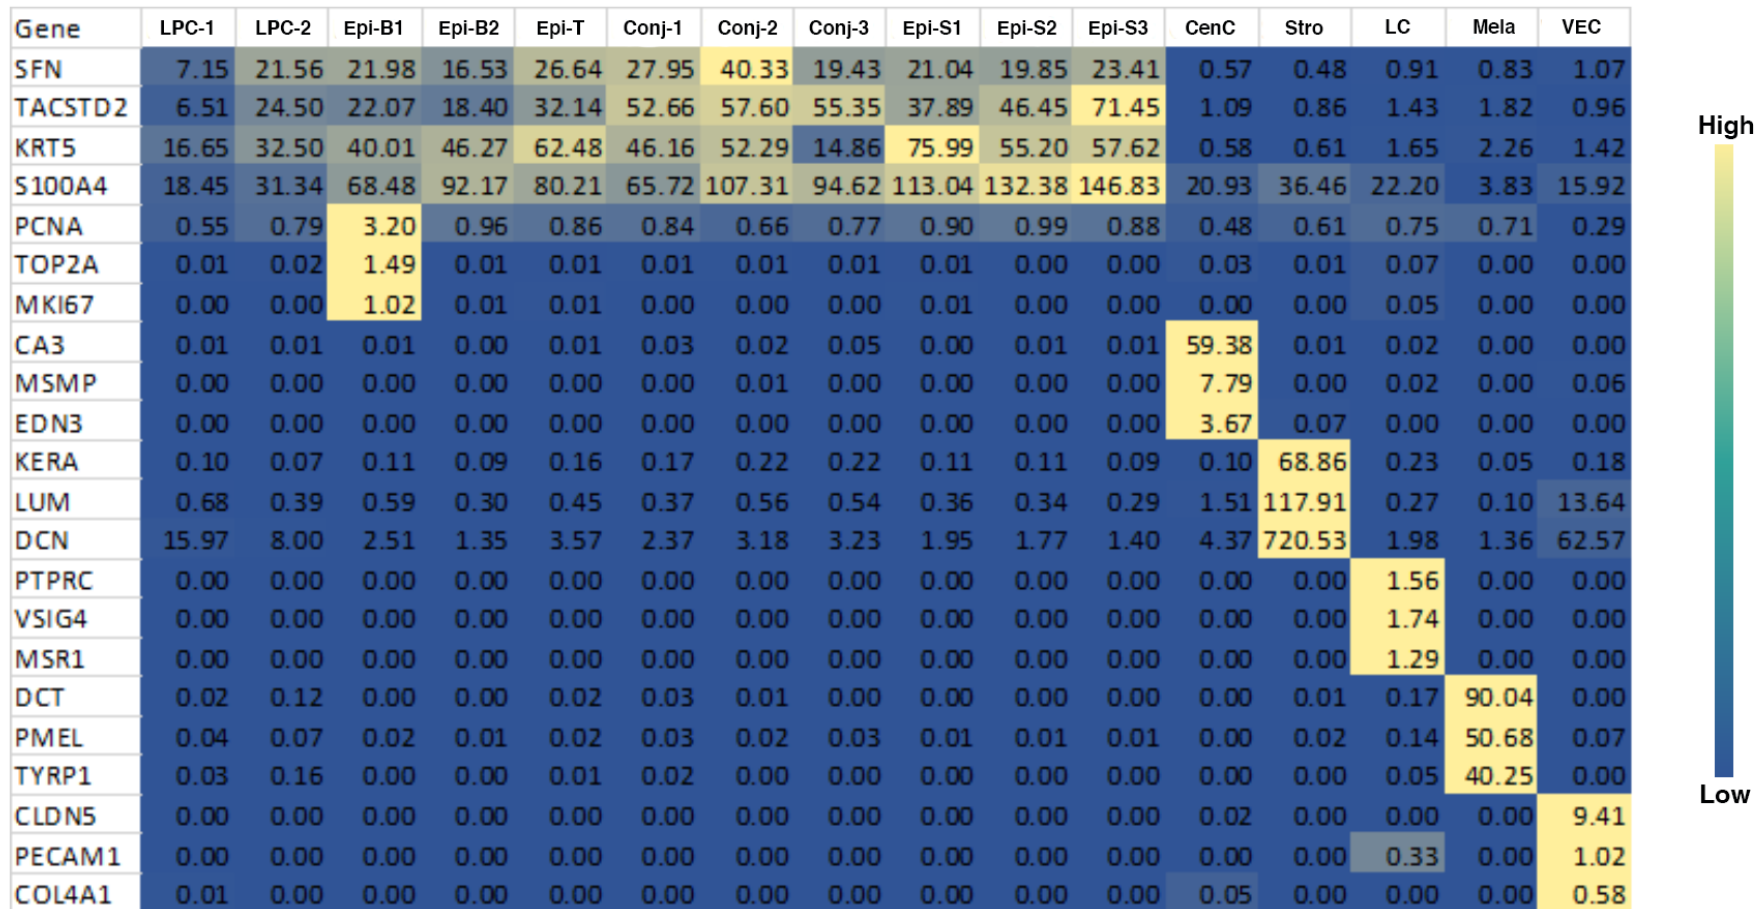

Supplementary Figure 1. Heatmap of cluster marker gene expression. This heatmap corresponds to the stacked violin plot in Figure 1. The genes are the marker genes of each cluster. The value in each cell is the average of normalized UMI of each gene in each cluster and the color is based on the range of values in each row.

## Supplementary Figure 2.

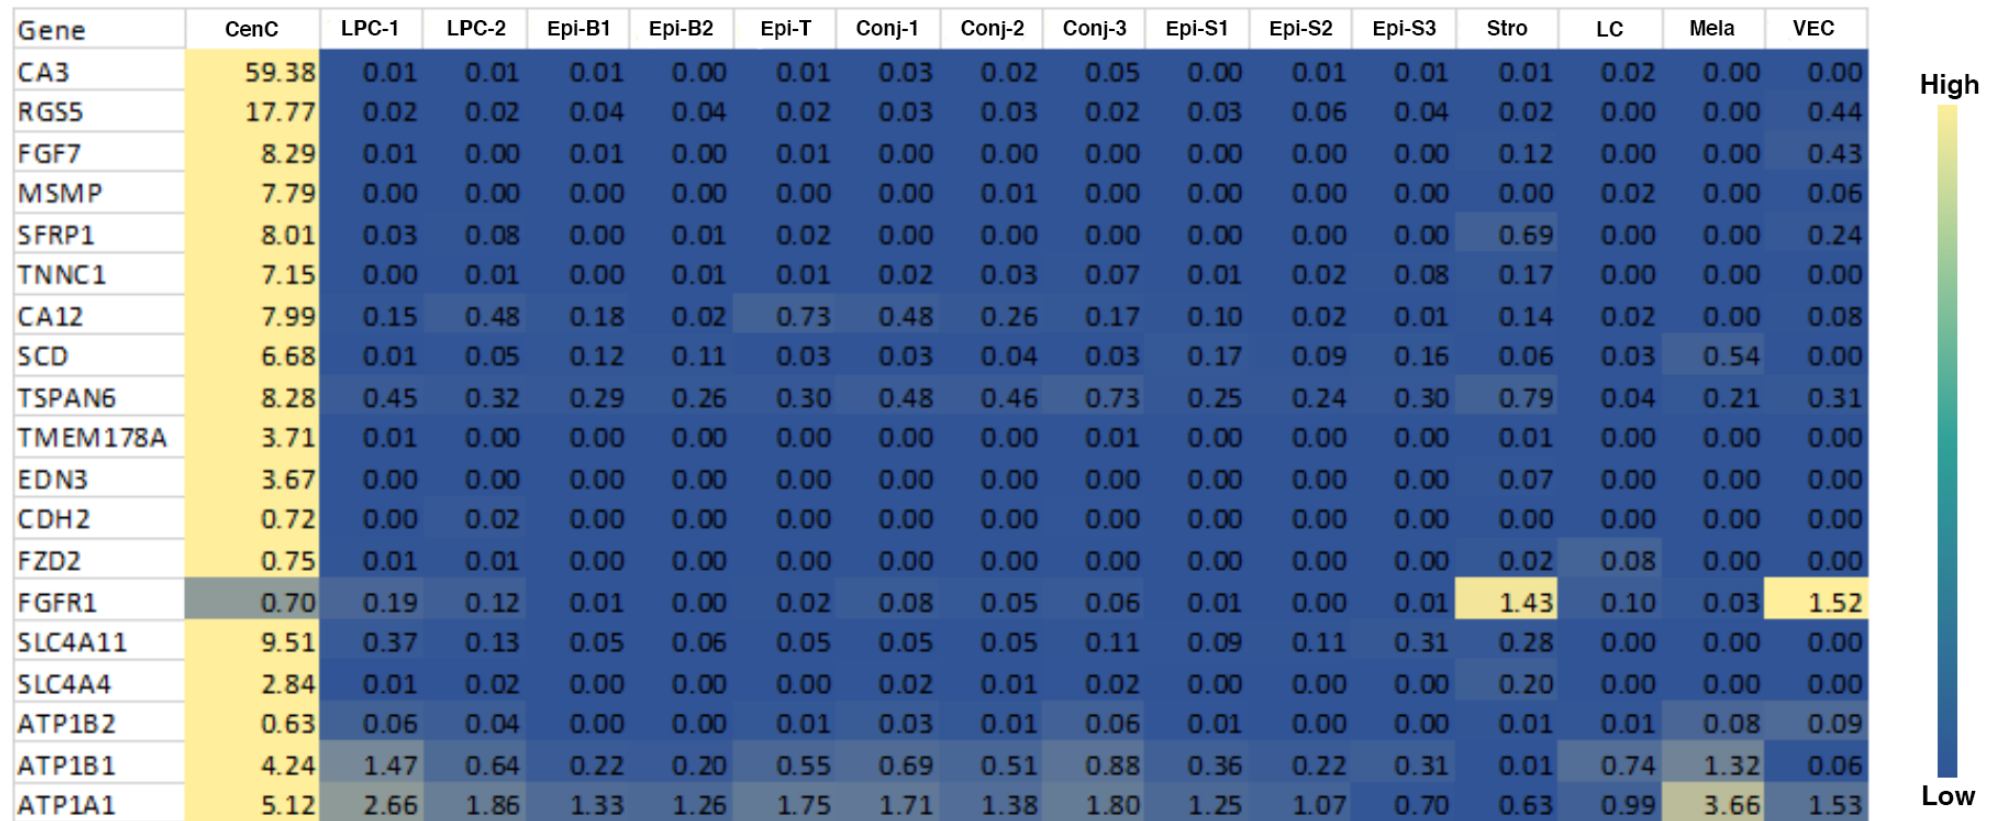

Supplementary Figure 2. Heatmap of cornea endothelial cluster marker gene expression across all clusters. This heatmap corresponds to the stacked violin plot in Figure 2. The value in each cell is the average of normalized UMI of each gene in each cluster and the color is based on the range of values in each row.

## Supplementary Figure 3.

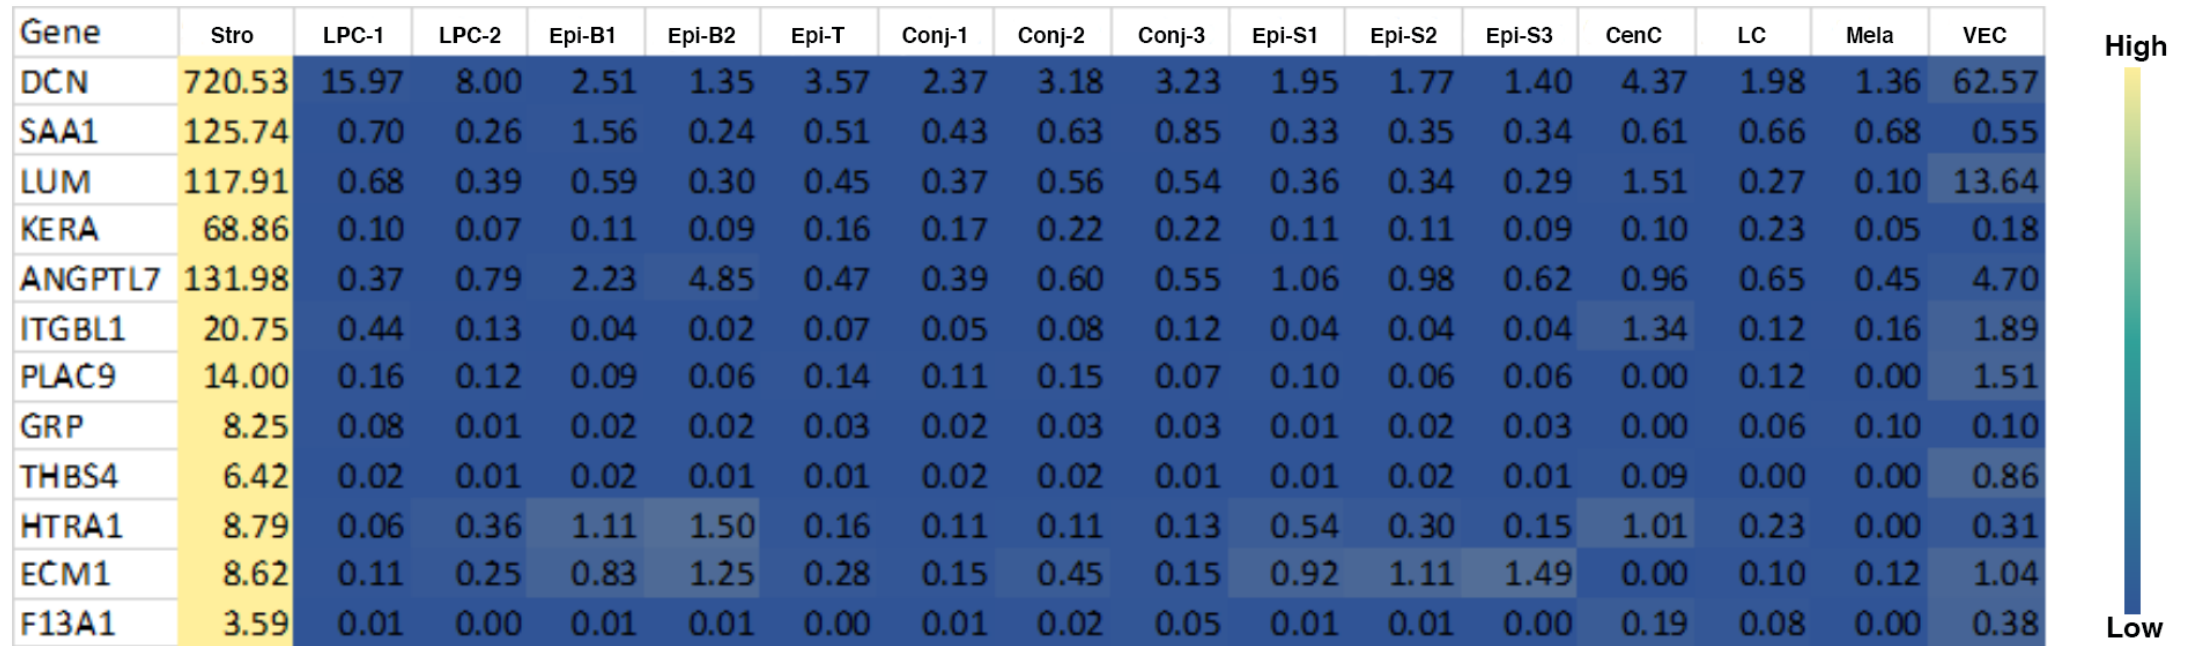

**Supplementary Figure 3. Heatmap of stromal cluster marker gene expression across all clusters. This heatmap corresponds to the stacked violin plot in Figure 3. The value in each cell is the average of normalized UMI of each gene in each cluster and the color is based on the range of values in each row.**

Supplementary Figure 4.

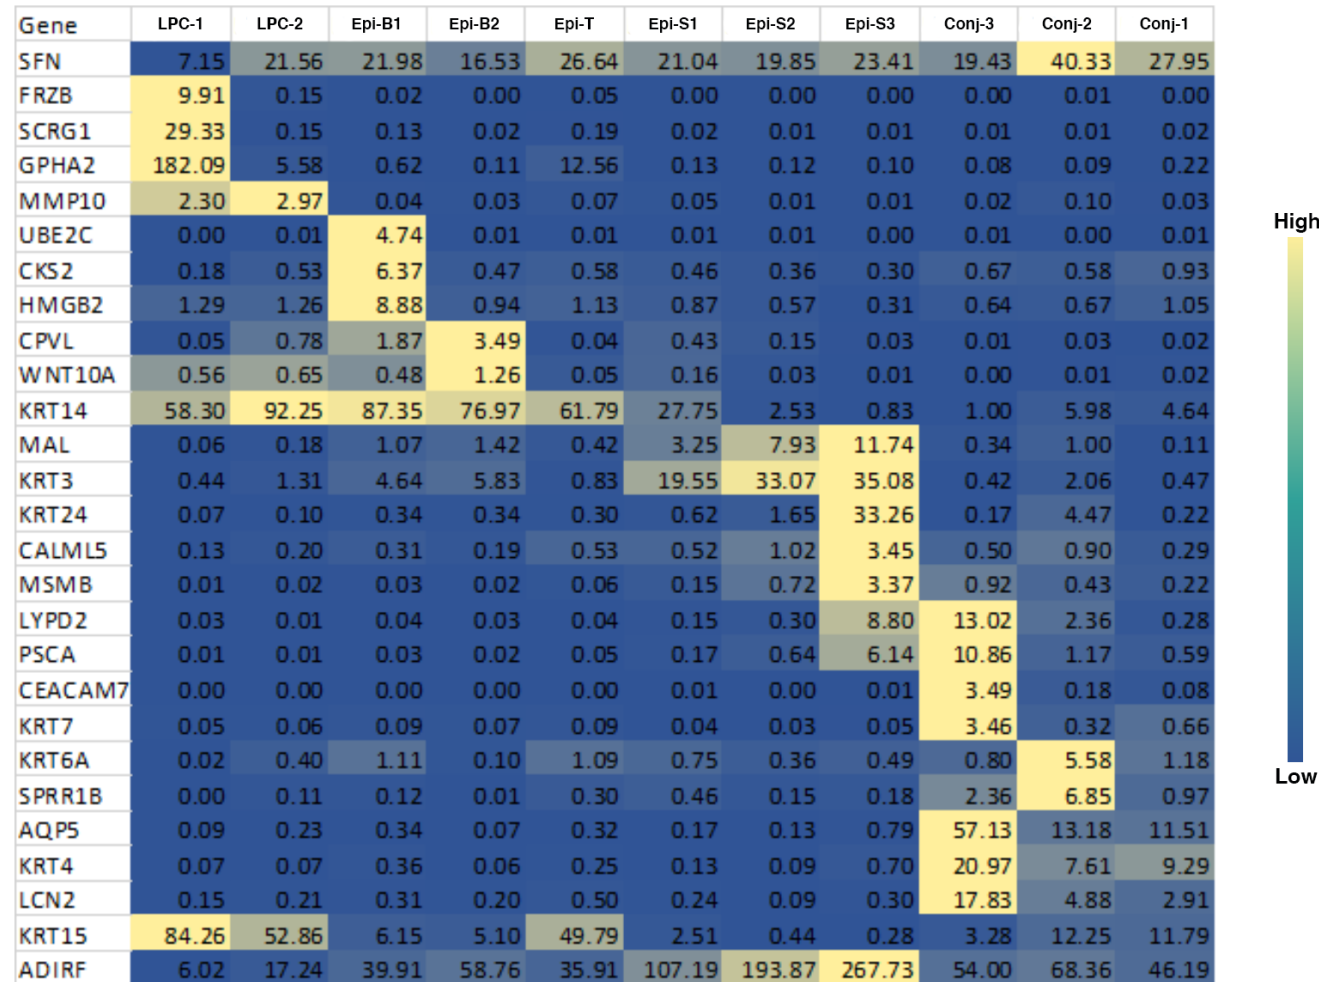

Supplementary Figure 4. Heatmap of epithelial cluster marker gene expression across epithelial clusters. This heatmap corresponds to the stacked violin plot in Figure 4. The value in each cell is the average of normalized UMI of each gene in each cluster and the color is based on the range of values in each row.

Supplementary Figure 5.

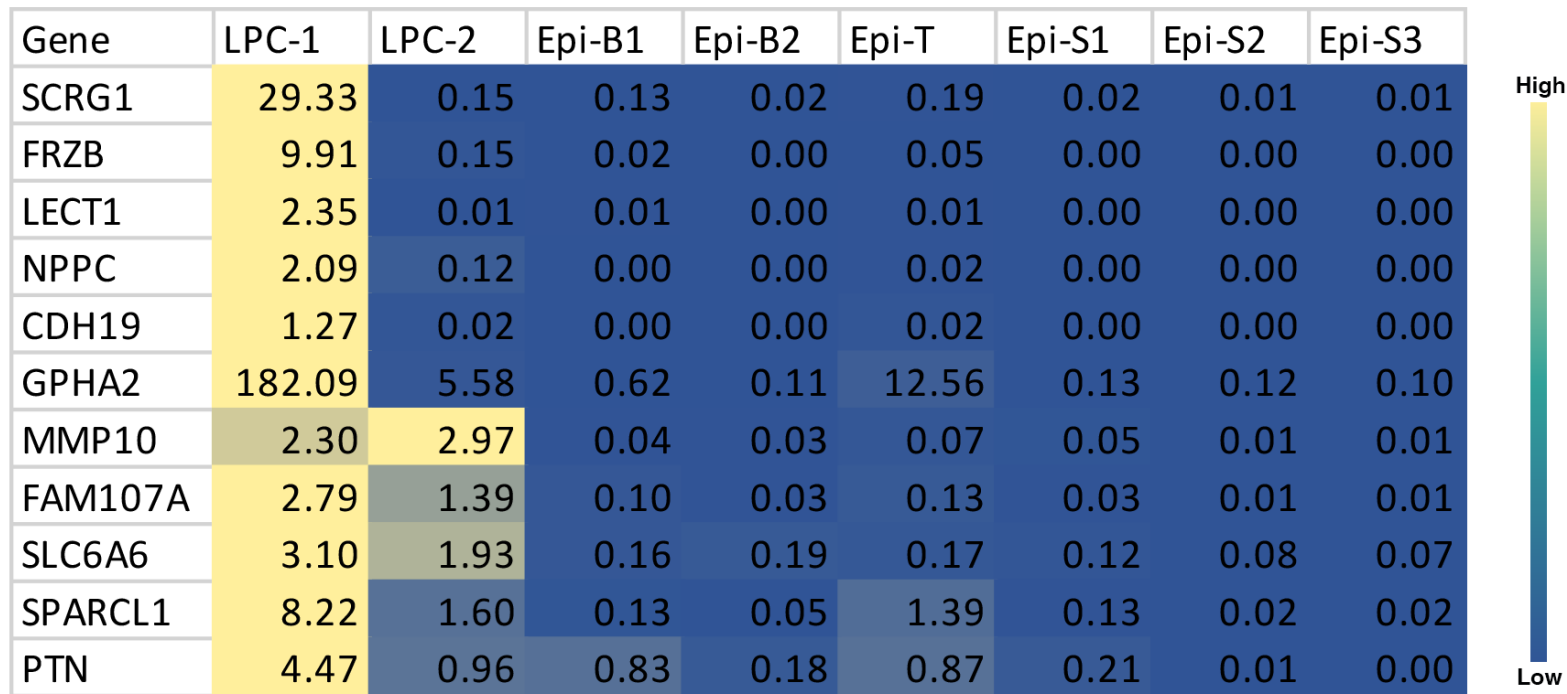

**Supplementary Figure 5. Heatmap of limbal epithelial stem cell cluster marker gene expression across all cornea epithelial clusters. This heatmap corresponds to the stacked violin plot in Figure 5. The value in each cell is the average of normalized UMI of each gene in each cluster and the color is based on the range of values in each row.**

# Supplementary Figure 6.

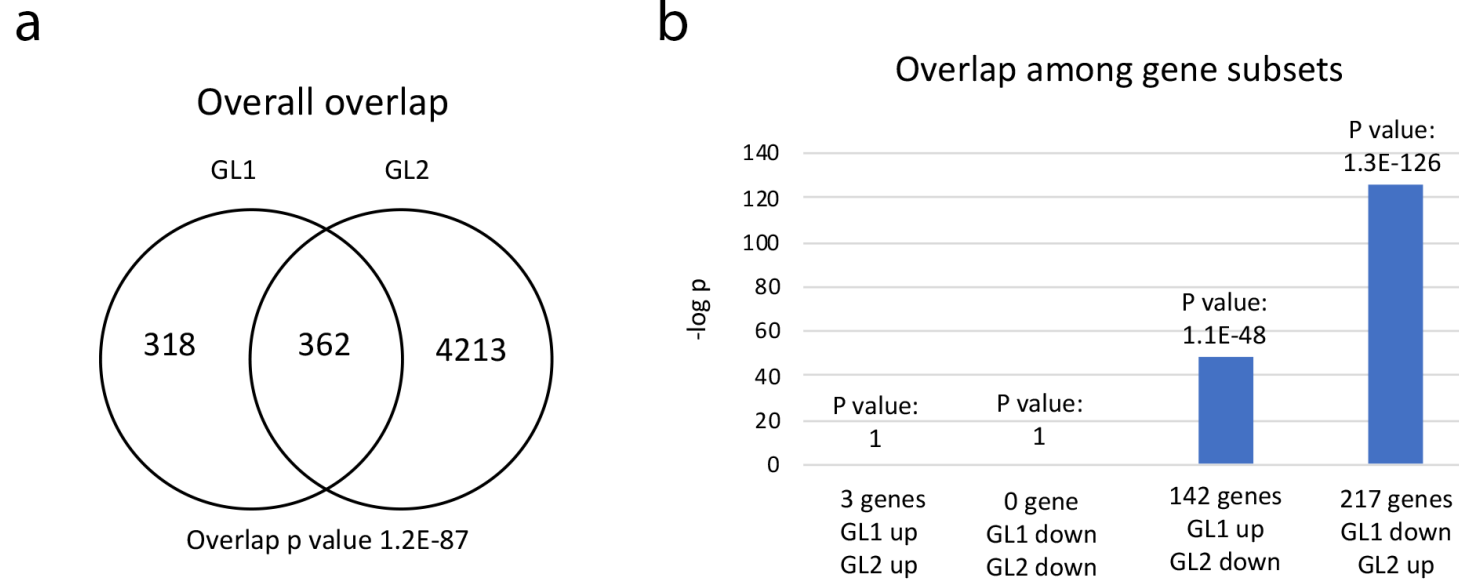

**Supplementary Figure 6. NextBio correlation analysis suggesting Conj-1, 2 and 3 as conjunctiva epithelial cells. Genes significantly differentially expressed in Conj-1, 2 and 3 vs. Epi-S1, 2 and 3 comparison (GL1) was used as input for NextBio correlation analysis (BaseSpace Correlation Engine) of their curated studies. The topmost correlated gene list was generated from cornea vs. conjunctiva epithelial cell comparison (GL2) (Ramierz-Miranda et al, 2011; Mol Vis 17:1652-1661). A. Overall overlap between the 2 gene lists and associated p value. B. Overlap among gene subsets and associated p value.**



Supplementary Figure 7.

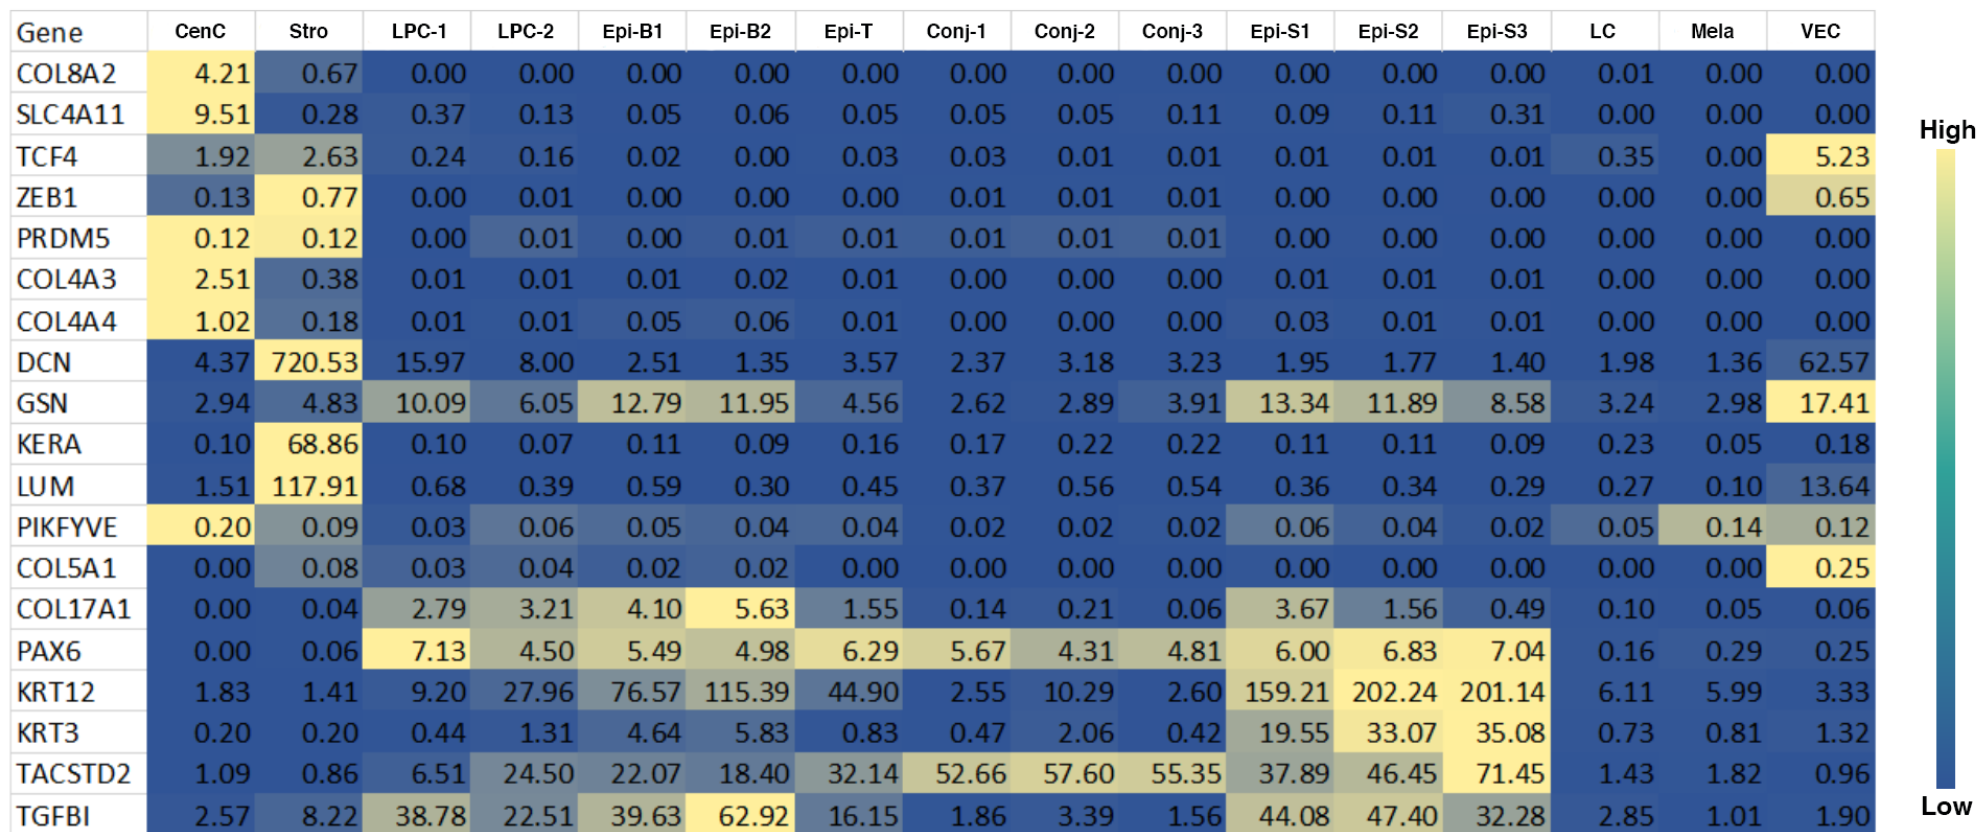

Supplementary Figure 7. Heatmap of the expression of cornea disease-related genes across all clusters. This heatmap corresponds to the stacked violin plot in Figure 7. The value in each cell is the average of normalized UMI of each gene in each cluster and the color is based on the range of values in each row.



## Supplementary Figure 8.

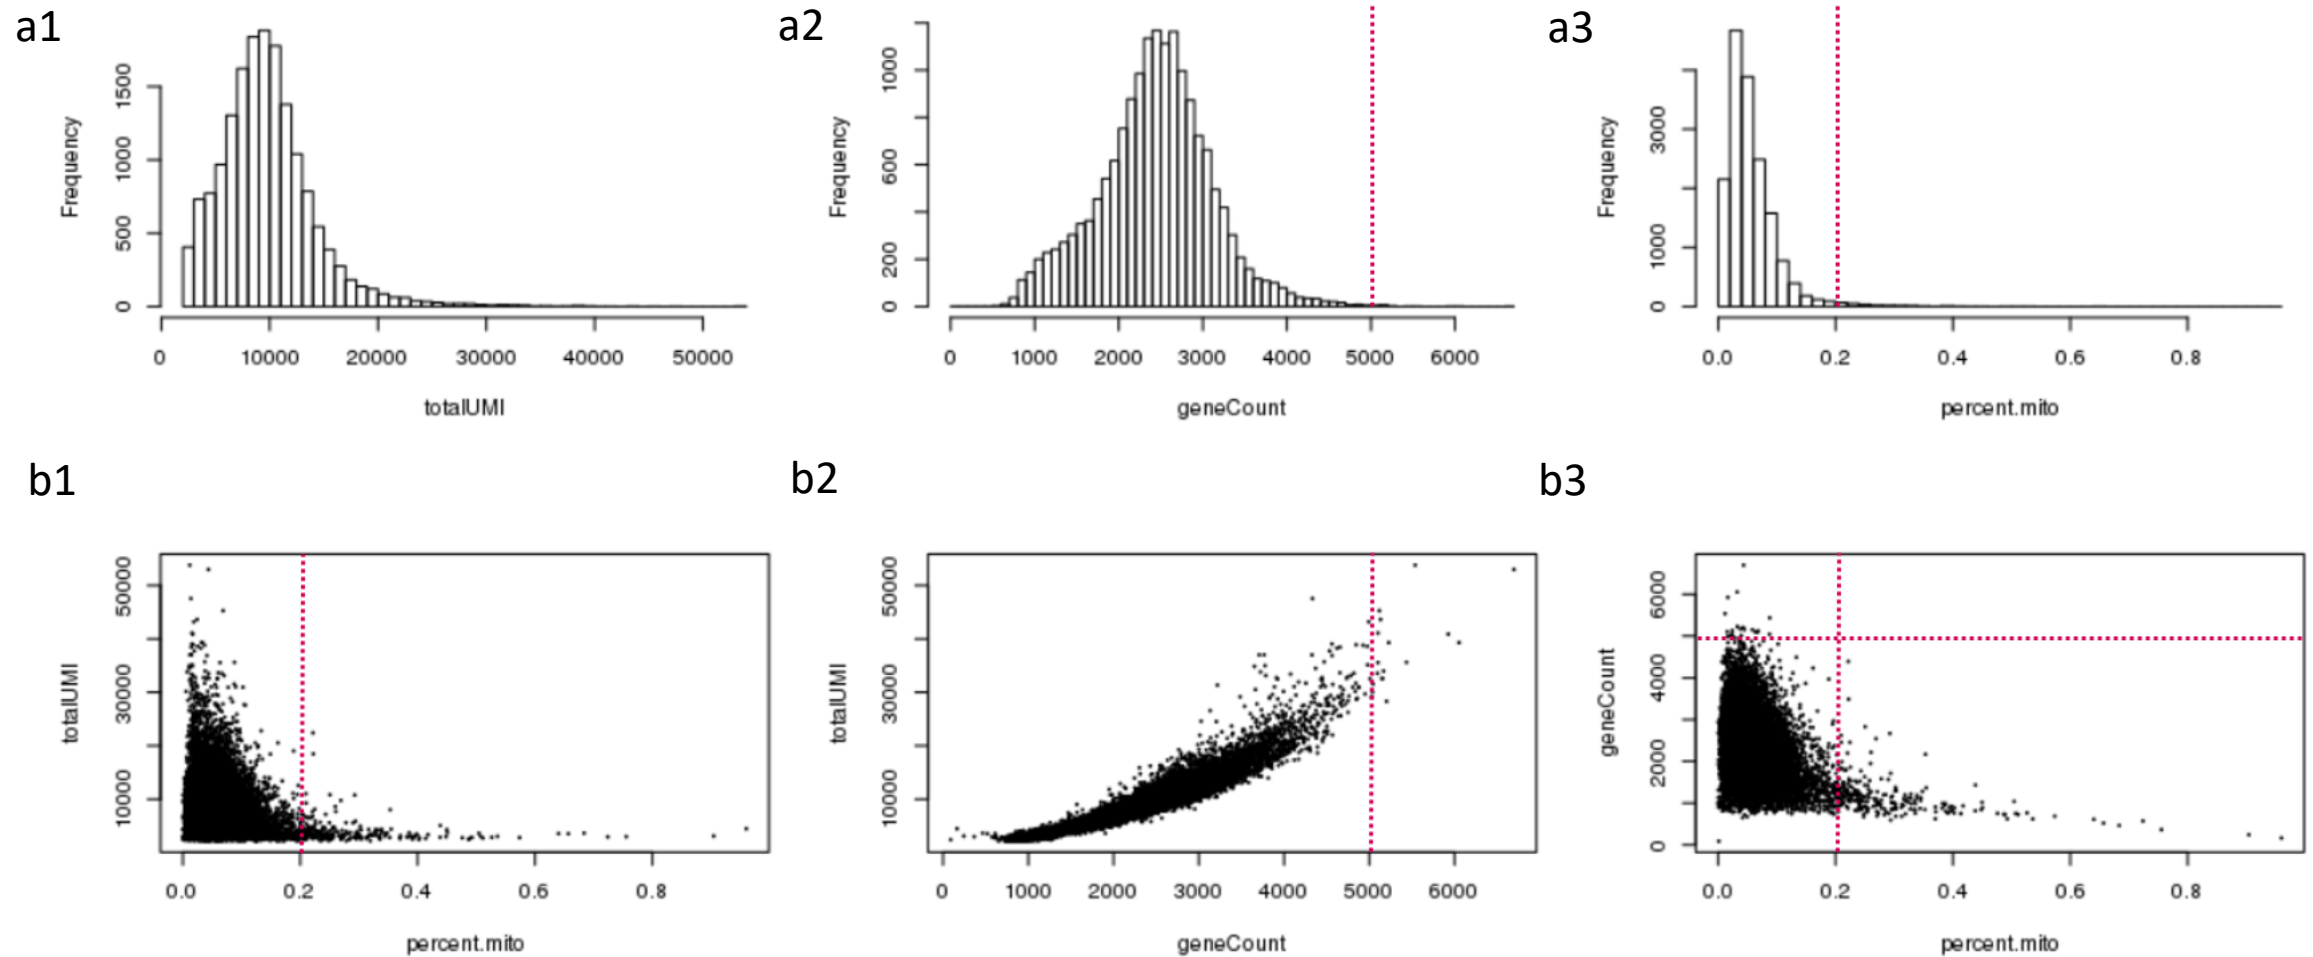

**Supplementary Figure 8.** Cell filtering based on QC. **a(1-3)**, Histogram of total UMI, number of genes detected or mitochondrial to total read count ratio across all cells, respectively. **b(1-3)**, Scatter plots of QC parameters. Red lines are the QC filtering criteria: cells that have less than 5000 genes detected and less than 20% mitochondria reads are kept for further analysis.

## Molecular characteristics and spatial distribution of adult human corneal cell subtypes

Ann J Ligocki, Wen Fury, Christian Gutierrez, Christina Adler, Tao Yang, Min Ni, Yu Bai, Yi Wei  
 ,Guillermo L Lehmann, Carmelo Romano

Supplementary Table 1. Gene expression values of cell cluster markers

p\_val: p value

avg\_LogFC: natural log transformed average UMI ratio between the cells of the specified cluster  
 (column G) and the cells outside the cluster

pct.1: percentage of cells in the specific cluster (column G) that the expression of a gene is detected

pct.2: percentage of cells outside the specified cluster that the expression of a gene is detected

p\_val\_adj: multiple test adjusted p value

cluster: the cluster for which the corresponding gene in the same row is a marker for

| gene     | p_val | avg_logFC | pct.1 | pct.2 | p_val_adj | cluster |
|----------|-------|-----------|-------|-------|-----------|---------|
| KRT3     | 0     | 1.533842  | 0.981 | 0.461 | 0         | Epi-S2  |
| MAL      | 0     | 1.221952  | 0.982 | 0.319 | 0         | Epi-S2  |
| KRT12    | 0     | 1.190519  | 0.995 | 0.781 | 0         | Epi-S2  |
| ADIRF    | 0     | 1.121309  | 1     | 0.982 | 0         | Epi-S2  |
| DAPL1    | 0     | 1.074493  | 0.999 | 0.792 | 0         | Epi-S2  |
| UPK1B    | 0     | 1.010959  | 0.995 | 0.653 | 0         | Epi-S2  |
| TKT      | 0     | 0.937521  | 0.999 | 0.83  | 0         | Epi-S2  |
| MGARP    | 0     | 0.898707  | 0.994 | 0.78  | 0         | Epi-S2  |
| RB1      | 0     | 0.877901  | 0.899 | 0.417 | 0         | Epi-S2  |
| MRPL33   | 0     | 0.874903  | 0.999 | 0.877 | 0         | Epi-S2  |
| MAL2     | 0     | 0.812855  | 0.875 | 0.396 | 0         | Epi-S2  |
| CTSL2    | 0     | 0.792462  | 0.991 | 0.555 | 0         | Epi-S2  |
| C8orf47  | 0     | 0.768472  | 0.99  | 0.691 | 0         | Epi-S2  |
| PIR      | 0     | 0.757     | 0.858 | 0.437 | 0         | Epi-S2  |
| CTSC     | 0     | 0.731736  | 0.858 | 0.499 | 0         | Epi-S2  |
| CLDN7    | 0     | 0.720699  | 0.972 | 0.523 | 0         | Epi-S2  |
| ADH7     | 0     | 0.714521  | 0.944 | 0.537 | 0         | Epi-S2  |
| GJB2     | 0     | 0.703694  | 0.995 | 0.587 | 0         | Epi-S2  |
| ALDH1A1  | 0     | 0.696412  | 0.999 | 0.84  | 0         | Epi-S2  |
| CALM2    | 0     | 0.691704  | 1     | 0.974 | 0         | Epi-S2  |
| GJB6     | 0     | 0.691147  | 0.988 | 0.521 | 0         | Epi-S2  |
| AGR2     | 0     | 0.683944  | 0.928 | 0.568 | 0         | Epi-S2  |
| LYPD3    | 0     | 0.682973  | 1     | 0.802 | 0         | Epi-S2  |
| C12orf75 | 0     | 0.681754  | 0.948 | 0.565 | 0         | Epi-S2  |
| TUBA4A   | 0     | 0.678015  | 0.966 | 0.684 | 0         | Epi-S2  |
| TGFBI    | 0     | 0.661449  | 0.997 | 0.876 | 0         | Epi-S2  |
| ENO1     | 0     | 0.644201  | 1     | 0.993 | 0         | Epi-S2  |
| GJB4     | 0     | 0.629215  | 0.814 | 0.37  | 0         | Epi-S2  |
| GYG1     | 0     | 0.613534  | 0.86  | 0.516 | 0         | Epi-S2  |
| NQO1     | 0     | 0.61087   | 1     | 0.932 | 0         | Epi-S2  |
| IER3IP1  | 0     | 0.59582   | 0.924 | 0.701 | 0         | Epi-S2  |
| CYP26A1  | 0     | 0.590006  | 0.366 | 0.082 | 0         | Epi-S2  |
| ADRB2    | 0     | 0.589218  | 0.96  | 0.673 | 0         | Epi-S2  |
| HCAR3    | 0     | 0.585014  | 0.829 | 0.514 | 0         | Epi-S2  |

|           |   |          |       |       |          |
|-----------|---|----------|-------|-------|----------|
| CA6       | 0 | 0.57693  | 0.391 | 0.067 | 0 Epi-S2 |
| LAD1      | 0 | 0.561617 | 0.803 | 0.38  | 0 Epi-S2 |
| LOC729966 | 0 | 0.553276 | 0.718 | 0.286 | 0 Epi-S2 |
| PERP      | 0 | 0.548075 | 1     | 0.899 | 0 Epi-S2 |
| TSTD1     | 0 | 0.545269 | 0.97  | 0.726 | 0 Epi-S2 |
| CSRP2     | 0 | 0.541309 | 0.996 | 0.849 | 0 Epi-S2 |
| SCD5      | 0 | 0.534089 | 0.751 | 0.375 | 0 Epi-S2 |
| PMVK      | 0 | 0.530344 | 0.93  | 0.68  | 0 Epi-S2 |
| S100A4    | 0 | 0.529959 | 1     | 0.995 | 0 Epi-S2 |
| AIM1      | 0 | 0.518762 | 0.777 | 0.372 | 0 Epi-S2 |
| SLURP1    | 0 | 0.518758 | 0.546 | 0.158 | 0 Epi-S2 |
| HCAR2     | 0 | 0.516907 | 0.922 | 0.624 | 0 Epi-S2 |
| DSC2      | 0 | 0.499943 | 0.843 | 0.443 | 0 Epi-S2 |
| MT1X      | 0 | 0.496367 | 1     | 0.969 | 0 Epi-S2 |
| BCL2L13   | 0 | 0.495767 | 0.951 | 0.714 | 0 Epi-S2 |
| CRTAC1    | 0 | 0.493243 | 0.993 | 0.617 | 0 Epi-S2 |
| TRIM36    | 0 | 0.485929 | 0.717 | 0.304 | 0 Epi-S2 |
| MRPS10    | 0 | 0.484851 | 0.856 | 0.574 | 0 Epi-S2 |
| LDHB      | 0 | 0.48483  | 0.949 | 0.807 | 0 Epi-S2 |
| IL20RA    | 0 | 0.478574 | 0.704 | 0.353 | 0 Epi-S2 |
| CLU       | 0 | 0.470969 | 1     | 0.989 | 0 Epi-S2 |
| MUC15     | 0 | 0.468372 | 0.745 | 0.377 | 0 Epi-S2 |
| GSN       | 0 | 0.467291 | 0.995 | 0.882 | 0 Epi-S2 |
| CAPG      | 0 | 0.466127 | 0.97  | 0.789 | 0 Epi-S2 |
| SDC1      | 0 | 0.461734 | 0.994 | 0.914 | 0 Epi-S2 |
| C4orf19   | 0 | 0.460507 | 0.617 | 0.223 | 0 Epi-S2 |
| AGPAT2    | 0 | 0.46004  | 0.819 | 0.526 | 0 Epi-S2 |
| CLCA4     | 0 | 0.458842 | 0.594 | 0.243 | 0 Epi-S2 |
| PRDX1     | 0 | 0.458833 | 1     | 0.984 | 0 Epi-S2 |
| TPD52     | 0 | 0.44719  | 0.903 | 0.61  | 0 Epi-S2 |
| DSG1      | 0 | 0.445545 | 0.767 | 0.409 | 0 Epi-S2 |
| COMT      | 0 | 0.438718 | 0.977 | 0.83  | 0 Epi-S2 |
| LINC00937 | 0 | 0.437519 | 0.465 | 0.129 | 0 Epi-S2 |
| PPIA      | 0 | 0.429215 | 0.995 | 0.95  | 0 Epi-S2 |
| SRP68     | 0 | 0.427307 | 0.766 | 0.475 | 0 Epi-S2 |
| RCBTB2    | 0 | 0.427204 | 0.57  | 0.23  | 0 Epi-S2 |
| TP53I3    | 0 | 0.423754 | 0.749 | 0.43  | 0 Epi-S2 |
| ATP6V0B   | 0 | 0.418276 | 0.973 | 0.845 | 0 Epi-S2 |
| SEC16B    | 0 | 0.415994 | 0.456 | 0.108 | 0 Epi-S2 |
| LGALS1    | 0 | 0.41411  | 0.616 | 0.264 | 0 Epi-S2 |
| NDUFV2    | 0 | 0.409118 | 0.954 | 0.801 | 0 Epi-S2 |
| GSTP1     | 0 | 0.407836 | 1     | 0.996 | 0 Epi-S2 |
| VAMP8     | 0 | 0.406028 | 0.963 | 0.708 | 0 Epi-S2 |
| PPP1R14C  | 0 | 0.398256 | 0.659 | 0.306 | 0 Epi-S2 |
| TAGLN2    | 0 | 0.397018 | 0.996 | 0.944 | 0 Epi-S2 |
| PPDPF     | 0 | 0.395975 | 1     | 0.958 | 0 Epi-S2 |
| SERBP1    | 0 | 0.394937 | 0.959 | 0.839 | 0 Epi-S2 |
| DSP       | 0 | 0.392781 | 0.956 | 0.706 | 0 Epi-S2 |

|                |           |          |       |       |           |        |
|----------------|-----------|----------|-------|-------|-----------|--------|
| PVRL4          | 0         | 0.388466 | 0.79  | 0.426 | 0         | Epi-S2 |
| CHCHD2         | 0         | 0.388257 | 0.997 | 0.977 | 0         | Epi-S2 |
| ANXA2          | 0         | 0.385765 | 1     | 0.993 | 0         | Epi-S2 |
| MYO5A          | 0         | 0.385737 | 0.411 | 0.111 | 0         | Epi-S2 |
| COX7B          | 0         | 0.38385  | 0.991 | 0.921 | 0         | Epi-S2 |
| NDUFB3         | 0         | 0.381807 | 0.941 | 0.792 | 0         | Epi-S2 |
| POLR2J2        | 0         | 0.371511 | 1     | 0.848 | 0         | Epi-S2 |
| POLR2J3        | 0         | 0.36897  | 0.999 | 0.838 | 0         | Epi-S2 |
| LGALS3         | 0         | 0.36357  | 1     | 0.986 | 0         | Epi-S2 |
| PRDX5          | 0         | 0.358293 | 0.998 | 0.97  | 0         | Epi-S2 |
| MFSD4          | 0         | 0.35621  | 0.559 | 0.241 | 0         | Epi-S2 |
| FSIP1          | 0         | 0.35414  | 0.444 | 0.128 | 0         | Epi-S2 |
| LOC100130476   | 0         | 0.344948 | 0.413 | 0.099 | 0         | Epi-S2 |
| DBI            | 0         | 0.343157 | 0.991 | 0.901 | 0         | Epi-S2 |
| RAB6B          | 0         | 0.340133 | 0.344 | 0.068 | 0         | Epi-S2 |
| COX6A1         | 0         | 0.326384 | 0.999 | 0.972 | 0         | Epi-S2 |
| COX6C          | 0         | 0.322123 | 0.996 | 0.959 | 0         | Epi-S2 |
| ACTG1          | 0         | 0.319103 | 1     | 0.993 | 0         | Epi-S2 |
| DCDC5          | 0         | 0.317473 | 0.428 | 0.142 | 0         | Epi-S2 |
| SH3GL3         | 0         | 0.315423 | 0.385 | 0.113 | 0         | Epi-S2 |
| COX7C          | 0         | 0.312682 | 0.999 | 0.98  | 0         | Epi-S2 |
| COX7A2         | 0         | 0.297634 | 0.998 | 0.97  | 0         | Epi-S2 |
| MTUS2          | 0         | 0.292735 | 0.351 | 0.091 | 0         | Epi-S2 |
| ITM2B          | 0         | 0.282651 | 1     | 0.995 | 0         | Epi-S2 |
| PRPSAP1        | 6.52E-308 | 0.396843 | 0.642 | 0.345 | 1.19E-303 | Epi-S2 |
| ENSG0000019871 | 2.16E-302 | 0.32566  | 1     | 0.996 | 3.94E-298 | Epi-S2 |
| RELL1          | 2.96E-302 | 0.44993  | 0.522 | 0.221 | 5.38E-298 | Epi-S2 |
| ELP4           | 8.47E-302 | 0.402976 | 0.585 | 0.276 | 1.54E-297 | Epi-S2 |
| DAAM1          | 8.60E-301 | 0.443238 | 0.857 | 0.577 | 1.57E-296 | Epi-S2 |
| VSNL1          | 7.57E-300 | 0.468858 | 0.823 | 0.542 | 1.38E-295 | Epi-S2 |
| RPA3           | 1.19E-298 | 0.402149 | 0.801 | 0.519 | 2.16E-294 | Epi-S2 |
| MYL12B         | 9.53E-296 | 0.279843 | 0.998 | 0.966 | 1.74E-291 | Epi-S2 |
| GHITM          | 2.60E-295 | 0.367829 | 0.952 | 0.826 | 4.73E-291 | Epi-S2 |
| COX5A          | 6.33E-291 | 0.342917 | 0.96  | 0.834 | 1.15E-286 | Epi-S2 |
| GALNT18        | 6.40E-291 | 0.320167 | 0.473 | 0.187 | 1.17E-286 | Epi-S2 |
| HSPB1          | 3.19E-290 | 0.379953 | 1     | 0.981 | 5.81E-286 | Epi-S2 |
| SCIN           | 5.35E-288 | 0.364211 | 0.551 | 0.248 | 9.74E-284 | Epi-S2 |
| NSG1           | 6.03E-288 | 0.376596 | 0.695 | 0.385 | 1.10E-283 | Epi-S2 |
| GNB2           | 1.35E-284 | 0.357089 | 0.945 | 0.813 | 2.46E-280 | Epi-S2 |
| C1QBP          | 3.26E-284 | 0.334757 | 0.978 | 0.846 | 5.93E-280 | Epi-S2 |
| MYH14          | 2.41E-283 | 0.336384 | 0.601 | 0.288 | 4.39E-279 | Epi-S2 |
| LYPLAL1        | 9.34E-283 | 0.390975 | 0.724 | 0.445 | 1.70E-278 | Epi-S2 |
| FTH1           | 1.37E-281 | 0.272528 | 1     | 1     | 2.49E-277 | Epi-S2 |
| SH3BGRL3       | 3.10E-281 | 0.322538 | 0.996 | 0.941 | 5.65E-277 | Epi-S2 |
| SPINT2         | 1.43E-280 | 0.344692 | 0.995 | 0.793 | 2.60E-276 | Epi-S2 |
| PEBP1          | 2.09E-276 | 0.278847 | 0.997 | 0.965 | 3.81E-272 | Epi-S2 |
| CLC            | 3.89E-272 | 0.262637 | 0.293 | 0.076 | 7.09E-268 | Epi-S2 |
| PAX6           | 2.15E-271 | 0.370862 | 0.983 | 0.75  | 3.92E-267 | Epi-S2 |

|           |           |          |       |       |           |        |
|-----------|-----------|----------|-------|-------|-----------|--------|
| COX5B     | 2.21E-270 | 0.278752 | 0.992 | 0.954 | 4.03E-266 | Epi-S2 |
| C14orf2   | 1.31E-269 | 0.296191 | 0.988 | 0.943 | 2.39E-265 | Epi-S2 |
| C10orf54  | 1.55E-269 | 0.402313 | 0.892 | 0.686 | 2.81E-265 | Epi-S2 |
| TBCB      | 1.34E-268 | 0.365272 | 0.852 | 0.633 | 2.44E-264 | Epi-S2 |
| NAGK      | 3.05E-268 | 0.369092 | 0.676 | 0.391 | 5.56E-264 | Epi-S2 |
| FXD3      | 1.14E-267 | 0.344034 | 1     | 0.827 | 2.08E-263 | Epi-S2 |
| BBOX1     | 2.93E-267 | 0.330143 | 0.58  | 0.275 | 5.33E-263 | Epi-S2 |
| TACSTD2   | 1.51E-265 | 0.381182 | 1     | 0.874 | 2.76E-261 | Epi-S2 |
| FA2H      | 1.92E-263 | 0.345359 | 0.618 | 0.3   | 3.50E-259 | Epi-S2 |
| SPINT1    | 2.22E-263 | 0.357585 | 0.859 | 0.591 | 4.04E-259 | Epi-S2 |
| ATP5I     | 1.56E-262 | 0.311372 | 0.979 | 0.902 | 2.83E-258 | Epi-S2 |
| USMG5     | 4.01E-262 | 0.281543 | 0.986 | 0.94  | 7.29E-258 | Epi-S2 |
| UQCR11    | 4.71E-261 | 0.276083 | 0.996 | 0.957 | 8.58E-257 | Epi-S2 |
| CLDN4     | 4.69E-260 | 0.453226 | 0.902 | 0.541 | 8.54E-256 | Epi-S2 |
| RBX1      | 1.77E-257 | 0.319896 | 0.958 | 0.865 | 3.22E-253 | Epi-S2 |
| KIF21A    | 5.58E-257 | 0.359554 | 0.672 | 0.377 | 1.02E-252 | Epi-S2 |
| OSTF1     | 3.98E-256 | 0.357102 | 0.826 | 0.582 | 7.24E-252 | Epi-S2 |
| POLR2I    | 6.09E-254 | 0.351497 | 0.888 | 0.71  | 1.11E-249 | Epi-S2 |
| TIMM8B    | 2.14E-251 | 0.337606 | 0.894 | 0.697 | 3.89E-247 | Epi-S2 |
| ASPH      | 4.89E-251 | 0.383158 | 0.951 | 0.812 | 8.90E-247 | Epi-S2 |
| RER1      | 7.60E-250 | 0.347459 | 0.903 | 0.708 | 1.38E-245 | Epi-S2 |
| GALNT3    | 1.09E-249 | 0.337638 | 0.539 | 0.259 | 1.98E-245 | Epi-S2 |
| ULBP2     | 2.13E-244 | 0.304071 | 0.487 | 0.216 | 3.88E-240 | Epi-S2 |
| PSMB6     | 2.03E-242 | 0.311181 | 0.94  | 0.824 | 3.70E-238 | Epi-S2 |
| TCEB2     | 1.22E-241 | 0.266189 | 0.992 | 0.952 | 2.23E-237 | Epi-S2 |
| TRIM29    | 6.17E-241 | 0.324893 | 0.959 | 0.728 | 1.12E-236 | Epi-S2 |
| NDUFB9    | 6.63E-241 | 0.322043 | 0.949 | 0.829 | 1.21E-236 | Epi-S2 |
| CAPS      | 4.60E-239 | 0.382783 | 0.737 | 0.449 | 8.38E-235 | Epi-S2 |
| DKK3      | 2.14E-238 | 0.303653 | 0.89  | 0.577 | 3.89E-234 | Epi-S2 |
| PSMB3     | 3.48E-237 | 0.307525 | 0.955 | 0.838 | 6.34E-233 | Epi-S2 |
| UQCR10    | 3.47E-235 | 0.290775 | 0.976 | 0.882 | 6.33E-231 | Epi-S2 |
| SPHK1     | 5.60E-235 | 0.274981 | 0.389 | 0.148 | 1.02E-230 | Epi-S2 |
| LOC728554 | 1.48E-234 | 0.34897  | 0.834 | 0.587 | 2.69E-230 | Epi-S2 |
| RAB25     | 4.61E-233 | 0.332532 | 0.819 | 0.521 | 8.40E-229 | Epi-S2 |
| SNRPG     | 1.07E-231 | 0.283601 | 0.968 | 0.902 | 1.94E-227 | Epi-S2 |
| UXS1      | 5.43E-231 | 0.336714 | 0.64  | 0.37  | 9.90E-227 | Epi-S2 |
| S100A14   | 1.45E-229 | 0.326378 | 0.972 | 0.724 | 2.64E-225 | Epi-S2 |
| GIPC1     | 2.81E-228 | 0.326283 | 0.877 | 0.654 | 5.12E-224 | Epi-S2 |
| SCCPDH    | 2.96E-228 | 0.286632 | 0.454 | 0.2   | 5.38E-224 | Epi-S2 |
| ATPIF1    | 3.67E-228 | 0.301476 | 0.977 | 0.878 | 6.69E-224 | Epi-S2 |
| EML2      | 2.87E-225 | 0.322715 | 0.658 | 0.393 | 5.22E-221 | Epi-S2 |
| TMSB4X    | 2.87E-225 | 0.283354 | 1     | 0.998 | 5.23E-221 | Epi-S2 |
| PHLDA3    | 8.87E-225 | 0.321042 | 0.915 | 0.707 | 1.62E-220 | Epi-S2 |
| SLIRP     | 1.45E-224 | 0.297672 | 0.956 | 0.86  | 2.64E-220 | Epi-S2 |
| CAPNS1    | 4.05E-223 | 0.354507 | 0.813 | 0.591 | 7.38E-219 | Epi-S2 |
| C4orf3    | 8.29E-223 | 0.296101 | 0.978 | 0.918 | 1.51E-218 | Epi-S2 |
| ATP5J2    | 4.86E-222 | 0.27154  | 0.981 | 0.904 | 8.85E-218 | Epi-S2 |
| GCHFR     | 2.36E-221 | 0.375465 | 0.682 | 0.426 | 4.30E-217 | Epi-S2 |

|          |           |          |       |       |           |        |
|----------|-----------|----------|-------|-------|-----------|--------|
| MAPK13   | 6.88E-221 | 0.302083 | 0.491 | 0.239 | 1.25E-216 | Epi-S2 |
| ATP6V1F  | 1.45E-219 | 0.28533  | 0.972 | 0.871 | 2.65E-215 | Epi-S2 |
| UBL5     | 1.70E-219 | 0.258435 | 0.989 | 0.945 | 3.09E-215 | Epi-S2 |
| RHOD     | 2.88E-218 | 0.324539 | 0.657 | 0.393 | 5.25E-214 | Epi-S2 |
| RAET1G   | 4.68E-218 | 0.322587 | 0.66  | 0.382 | 8.52E-214 | Epi-S2 |
| POMP     | 5.28E-218 | 0.266647 | 0.978 | 0.914 | 9.62E-214 | Epi-S2 |
| NDUFB4   | 9.97E-218 | 0.276256 | 0.976 | 0.9   | 1.81E-213 | Epi-S2 |
| TUFT1    | 1.36E-215 | 0.337755 | 0.582 | 0.323 | 2.47E-211 | Epi-S2 |
| NDUFC1   | 8.27E-213 | 0.276013 | 0.975 | 0.898 | 1.51E-208 | Epi-S2 |
| FKBP1A   | 2.93E-212 | 0.29967  | 0.942 | 0.817 | 5.34E-208 | Epi-S2 |
| ATP5J    | 3.63E-211 | 0.259092 | 0.985 | 0.928 | 6.61E-207 | Epi-S2 |
| MOCS2    | 1.52E-210 | 0.336496 | 0.677 | 0.432 | 2.76E-206 | Epi-S2 |
| MGST3    | 1.85E-210 | 0.264646 | 0.981 | 0.913 | 3.37E-206 | Epi-S2 |
| ECHS1    | 1.50E-209 | 0.299475 | 0.906 | 0.75  | 2.74E-205 | Epi-S2 |
| FAM169A  | 6.69E-209 | 0.256242 | 0.41  | 0.171 | 1.22E-204 | Epi-S2 |
| SDR16C5  | 1.60E-208 | 0.295127 | 0.565 | 0.301 | 2.92E-204 | Epi-S2 |
| MKRN1    | 6.08E-206 | 0.337076 | 0.73  | 0.504 | 1.11E-201 | Epi-S2 |
| DCXR     | 1.60E-205 | 0.329804 | 0.851 | 0.666 | 2.92E-201 | Epi-S2 |
| PID1     | 6.50E-205 | 0.297224 | 0.574 | 0.302 | 1.18E-200 | Epi-S2 |
| POF1B    | 2.44E-204 | 0.252185 | 0.373 | 0.151 | 4.44E-200 | Epi-S2 |
| ALDH3A2  | 1.80E-203 | 0.344459 | 0.806 | 0.604 | 3.28E-199 | Epi-S2 |
| CALML5   | 6.93E-202 | 0.275925 | 0.448 | 0.202 | 1.26E-197 | Epi-S2 |
| NMU      | 9.74E-202 | 0.259579 | 0.461 | 0.216 | 1.77E-197 | Epi-S2 |
| NDUFAB1  | 2.42E-200 | 0.295445 | 0.908 | 0.773 | 4.41E-196 | Epi-S2 |
| ATP5G3   | 2.17E-199 | 0.276077 | 0.965 | 0.884 | 3.94E-195 | Epi-S2 |
| WLS      | 2.67E-199 | 0.303829 | 0.699 | 0.44  | 4.86E-195 | Epi-S2 |
| SNCG     | 3.57E-199 | 0.320433 | 0.58  | 0.317 | 6.50E-195 | Epi-S2 |
| SCEL     | 2.44E-197 | 0.29484  | 0.636 | 0.368 | 4.44E-193 | Epi-S2 |
| DSC3     | 9.71E-197 | 0.29343  | 0.717 | 0.459 | 1.77E-192 | Epi-S2 |
| JUP      | 2.39E-194 | 0.289658 | 0.841 | 0.611 | 4.35E-190 | Epi-S2 |
| ATP5B    | 5.39E-193 | 0.278928 | 0.969 | 0.902 | 9.81E-189 | Epi-S2 |
| RHOV     | 2.26E-192 | 0.276688 | 0.909 | 0.566 | 4.11E-188 | Epi-S2 |
| THOC7    | 7.11E-192 | 0.298233 | 0.855 | 0.673 | 1.29E-187 | Epi-S2 |
| KRT18    | 1.69E-191 | 0.315566 | 0.93  | 0.69  | 3.07E-187 | Epi-S2 |
| MPZL2    | 5.51E-191 | 0.305439 | 0.886 | 0.629 | 1.00E-186 | Epi-S2 |
| EMP2     | 1.54E-188 | 0.303508 | 0.858 | 0.67  | 2.81E-184 | Epi-S2 |
| XRCC6BP1 | 3.16E-188 | 0.281287 | 0.566 | 0.315 | 5.75E-184 | Epi-S2 |
| SERPIN5  | 6.67E-188 | 0.362838 | 0.902 | 0.673 | 1.22E-183 | Epi-S2 |
| TMEM19   | 1.50E-187 | 0.283253 | 0.514 | 0.274 | 2.73E-183 | Epi-S2 |
| RNF39    | 7.98E-185 | 0.346495 | 0.651 | 0.401 | 1.45E-180 | Epi-S2 |
| TOM1L1   | 1.59E-181 | 0.308241 | 0.478 | 0.253 | 2.89E-177 | Epi-S2 |
| ATP5F1   | 7.47E-181 | 0.272496 | 0.938 | 0.81  | 1.36E-176 | Epi-S2 |
| SOD1     | 1.19E-179 | 0.275948 | 0.967 | 0.881 | 2.17E-175 | Epi-S2 |
| ANP32A   | 3.08E-179 | 0.290946 | 0.735 | 0.511 | 5.62E-175 | Epi-S2 |
| SYNGR2   | 5.07E-179 | 0.300394 | 0.803 | 0.586 | 9.23E-175 | Epi-S2 |
| TIMM13   | 2.43E-178 | 0.282092 | 0.904 | 0.743 | 4.42E-174 | Epi-S2 |
| PSMC5    | 3.63E-177 | 0.280529 | 0.9   | 0.766 | 6.61E-173 | Epi-S2 |
| EPHX2    | 1.07E-176 | 0.280567 | 0.518 | 0.291 | 1.94E-172 | Epi-S2 |

|          |           |          |       |       |           |        |
|----------|-----------|----------|-------|-------|-----------|--------|
| HM13     | 4.19E-176 | 0.274747 | 0.765 | 0.541 | 7.62E-172 | Epi-S2 |
| SLC25A3  | 5.92E-176 | 0.271982 | 0.965 | 0.895 | 1.08E-171 | Epi-S2 |
| YPEL5    | 2.76E-175 | 0.321971 | 0.956 | 0.856 | 5.03E-171 | Epi-S2 |
| THOC3    | 5.31E-175 | 0.295454 | 0.666 | 0.424 | 9.67E-171 | Epi-S2 |
| NDUFB6   | 3.66E-174 | 0.279913 | 0.898 | 0.753 | 6.66E-170 | Epi-S2 |
| KRT5     | 4.86E-174 | 0.294706 | 1     | 0.848 | 8.85E-170 | Epi-S2 |
| PPP1CA   | 1.49E-173 | 0.268568 | 0.916 | 0.747 | 2.71E-169 | Epi-S2 |
| ATP6V1E1 | 3.29E-173 | 0.285073 | 0.867 | 0.701 | 6.00E-169 | Epi-S2 |
| TMPRSS4  | 1.18E-171 | 0.273572 | 0.615 | 0.376 | 2.15E-167 | Epi-S2 |
| SSBP1    | 3.04E-171 | 0.266002 | 0.914 | 0.773 | 5.54E-167 | Epi-S2 |
| ID1      | 1.17E-170 | 0.262103 | 0.998 | 0.948 | 2.12E-166 | Epi-S2 |
| MRPL3    | 1.86E-169 | 0.289422 | 0.719 | 0.515 | 3.39E-165 | Epi-S2 |
| DYNLRB1  | 9.51E-169 | 0.268357 | 0.915 | 0.789 | 1.73E-164 | Epi-S2 |
| NIPSNAP1 | 1.10E-165 | 0.255115 | 0.46  | 0.244 | 2.00E-161 | Epi-S2 |
| PAIP2    | 3.18E-164 | 0.280237 | 0.879 | 0.744 | 5.79E-160 | Epi-S2 |
| FAM162A  | 1.32E-160 | 0.266614 | 0.864 | 0.716 | 2.41E-156 | Epi-S2 |
| HSBP1L1  | 4.86E-160 | 0.279328 | 0.699 | 0.473 | 8.84E-156 | Epi-S2 |
| GPX2     | 1.17E-159 | 0.338084 | 0.569 | 0.336 | 2.13E-155 | Epi-S2 |
| PDHB     | 5.44E-159 | 0.268299 | 0.711 | 0.5   | 9.90E-155 | Epi-S2 |
| AP1S1    | 7.50E-159 | 0.281918 | 0.704 | 0.491 | 1.37E-154 | Epi-S2 |
| MRPL20   | 1.30E-158 | 0.275    | 0.871 | 0.719 | 2.37E-154 | Epi-S2 |
| YWHAZ    | 3.29E-158 | 0.252919 | 0.927 | 0.817 | 6.00E-154 | Epi-S2 |
| NDUFA2   | 4.37E-158 | 0.266039 | 0.885 | 0.746 | 7.96E-154 | Epi-S2 |
| TXNL4A   | 6.67E-158 | 0.279938 | 0.688 | 0.492 | 1.21E-153 | Epi-S2 |
| UBAC1    | 8.97E-157 | 0.268361 | 0.586 | 0.369 | 1.63E-152 | Epi-S2 |
| SLC26A2  | 4.84E-156 | 0.264966 | 0.475 | 0.258 | 8.82E-152 | Epi-S2 |
| PKP3     | 1.99E-154 | 0.259838 | 0.715 | 0.475 | 3.62E-150 | Epi-S2 |
| RNF149   | 5.41E-154 | 0.264713 | 0.604 | 0.379 | 9.85E-150 | Epi-S2 |
| REEP4    | 9.15E-154 | 0.258666 | 0.576 | 0.351 | 1.67E-149 | Epi-S2 |
| UQCRC1   | 1.51E-153 | 0.270165 | 0.875 | 0.721 | 2.74E-149 | Epi-S2 |
| HSD17B8  | 2.85E-152 | 0.262906 | 0.61  | 0.392 | 5.20E-148 | Epi-S2 |
| LSMD1    | 3.62E-152 | 0.267283 | 0.911 | 0.785 | 6.60E-148 | Epi-S2 |
| WDR61    | 7.50E-151 | 0.26829  | 0.774 | 0.581 | 1.36E-146 | Epi-S2 |
| CLEC7A   | 8.14E-151 | 0.25154  | 0.518 | 0.297 | 1.48E-146 | Epi-S2 |
| VPS28    | 4.12E-150 | 0.271054 | 0.819 | 0.64  | 7.50E-146 | Epi-S2 |
| TUBB6    | 1.52E-149 | 0.310279 | 0.681 | 0.479 | 2.76E-145 | Epi-S2 |
| BTF3L4   | 2.25E-149 | 0.272609 | 0.776 | 0.597 | 4.10E-145 | Epi-S2 |
| PGD      | 9.60E-149 | 0.261645 | 0.75  | 0.536 | 1.75E-144 | Epi-S2 |
| CAPN1    | 3.02E-148 | 0.257848 | 0.843 | 0.655 | 5.50E-144 | Epi-S2 |
| COPS8    | 1.34E-144 | 0.266739 | 0.812 | 0.632 | 2.44E-140 | Epi-S2 |
| GJB5     | 1.64E-144 | 0.263778 | 0.723 | 0.493 | 2.99E-140 | Epi-S2 |
| MRPL52   | 3.79E-144 | 0.259669 | 0.814 | 0.645 | 6.90E-140 | Epi-S2 |
| IFITM10  | 2.72E-143 | 0.257529 | 0.454 | 0.248 | 4.95E-139 | Epi-S2 |
| DNAJB2   | 1.15E-142 | 0.267776 | 0.643 | 0.44  | 2.10E-138 | Epi-S2 |
| ATP5A1   | 3.39E-142 | 0.263655 | 0.912 | 0.805 | 6.17E-138 | Epi-S2 |
| MT1H     | 1.02E-141 | 0.278224 | 0.352 | 0.164 | 1.85E-137 | Epi-S2 |
| NAPRT1   | 1.70E-141 | 0.25651  | 0.654 | 0.446 | 3.10E-137 | Epi-S2 |
| TNFSF10  | 7.27E-141 | 0.250343 | 0.836 | 0.6   | 1.32E-136 | Epi-S2 |



|          |           |          |       |       |           |        |
|----------|-----------|----------|-------|-------|-----------|--------|
| POLE4    | 2.69E-140 | 0.272047 | 0.621 | 0.419 | 4.91E-136 | Epi-S2 |
| PFN2     | 2.11E-139 | 0.251638 | 0.806 | 0.614 | 3.84E-135 | Epi-S2 |
| HIGD1A   | 1.57E-138 | 0.258471 | 0.794 | 0.616 | 2.85E-134 | Epi-S2 |
| CCND1    | 3.62E-138 | 0.255865 | 0.822 | 0.62  | 6.59E-134 | Epi-S2 |
| TIMM17A  | 2.27E-136 | 0.25286  | 0.782 | 0.603 | 4.14E-132 | Epi-S2 |
| PYGL     | 1.99E-135 | 0.256329 | 0.649 | 0.437 | 3.63E-131 | Epi-S2 |
| ZFYVE21  | 5.50E-134 | 0.258001 | 0.788 | 0.62  | 1.00E-129 | Epi-S2 |
| MTCH2    | 3.08E-127 | 0.250701 | 0.635 | 0.445 | 5.61E-123 | Epi-S2 |
| DUSP23   | 8.21E-126 | 0.259893 | 0.9   | 0.773 | 1.50E-121 | Epi-S2 |
| SDC4     | 8.96E-120 | 0.376756 | 0.754 | 0.572 | 1.63E-115 | Epi-S2 |
| MT1G     | 4.93E-117 | 0.326559 | 0.432 | 0.244 | 8.98E-113 | Epi-S2 |
| CDC42    | 4.01E-99  | 0.265623 | 0.873 | 0.753 | 7.31E-95  | Epi-S2 |
| RND3     | 5.28E-71  | 0.275813 | 0.728 | 0.588 | 9.61E-67  | Epi-S2 |
| DCN      | 0         | 5.261803 | 1     | 0.696 | 0         | Stro   |
| APOD     | 0         | 5.061727 | 1     | 0.589 | 0         | Stro   |
| SAA1     | 0         | 4.493617 | 0.883 | 0.248 | 0         | Stro   |
| PTGDS    | 0         | 4.465475 | 0.996 | 0.343 | 0         | Stro   |
| LUM      | 0         | 4.433742 | 1     | 0.235 | 0         | Stro   |
| KERA     | 0         | 4.126191 | 0.992 | 0.091 | 0         | Stro   |
| ANGPTL7  | 0         | 4.027056 | 0.993 | 0.473 | 0         | Stro   |
| SOD3     | 0         | 3.272922 | 0.998 | 0.162 | 0         | Stro   |
| VIM      | 0         | 3.101935 | 1     | 0.212 | 0         | Stro   |
| ITGBL1   | 0         | 3.016256 | 0.996 | 0.046 | 0         | Stro   |
| LGALS1   | 0         | 2.661328 | 1     | 0.208 | 0         | Stro   |
| PLAC9    | 0         | 2.619341 | 0.986 | 0.076 | 0         | Stro   |
| MMP3     | 0         | 2.507459 | 0.476 | 0.025 | 0         | Stro   |
| SERPING1 | 0         | 2.461318 | 0.995 | 0.104 | 0         | Stro   |
| SERPINF1 | 0         | 2.410457 | 0.998 | 0.441 | 0         | Stro   |
| AQP1     | 0         | 2.385669 | 0.981 | 0.042 | 0         | Stro   |
| CFH      | 0         | 2.317969 | 0.938 | 0.029 | 0         | Stro   |
| NNMT     | 0         | 2.309553 | 0.972 | 0.028 | 0         | Stro   |
| TSC22D1  | 0         | 2.287772 | 0.99  | 0.515 | 0         | Stro   |
| GRP      | 0         | 2.200506 | 0.88  | 0.021 | 0         | Stro   |
| COL12A1  | 0         | 2.19659  | 0.969 | 0.054 | 0         | Stro   |
| SDC2     | 0         | 2.189829 | 0.981 | 0.028 | 0         | Stro   |
| IFITM3   | 0         | 2.129328 | 1     | 0.514 | 0         | Stro   |
| RARRES1  | 0         | 1.987473 | 0.901 | 0.073 | 0         | Stro   |
| THBS4    | 0         | 1.985573 | 0.941 | 0.015 | 0         | Stro   |
| IFITM1   | 0         | 1.984277 | 0.964 | 0.216 | 0         | Stro   |
| PMP22    | 0         | 1.942263 | 0.974 | 0.042 | 0         | Stro   |
| TIMP3    | 0         | 1.924118 | 0.926 | 0.244 | 0         | Stro   |
| HTRA1    | 0         | 1.910974 | 0.959 | 0.269 | 0         | Stro   |
| CYTL1    | 0         | 1.909616 | 0.595 | 0.024 | 0         | Stro   |
| OLFML3   | 0         | 1.896219 | 0.95  | 0.027 | 0         | Stro   |
| MT2A     | 0         | 1.885386 | 0.999 | 0.884 | 0         | Stro   |
| IGFBP6   | 0         | 1.873543 | 0.999 | 0.815 | 0         | Stro   |
| TIMP1    | 0         | 1.848038 | 0.996 | 0.578 | 0         | Stro   |
| COL6A1   | 0         | 1.828531 | 0.953 | 0.026 | 0         | Stro   |

|              |   |          |       |       |        |
|--------------|---|----------|-------|-------|--------|
| CRABP2       | 0 | 1.822021 | 0.945 | 0.167 | 0 Stro |
| CST3         | 0 | 1.789627 | 1     | 0.991 | 0 Stro |
| SELM         | 0 | 1.769246 | 0.984 | 0.228 | 0 Stro |
| C1S          | 0 | 1.735681 | 0.922 | 0.027 | 0 Stro |
| SPARCL1      | 0 | 1.732347 | 0.884 | 0.159 | 0 Stro |
| CTGF         | 0 | 1.72153  | 0.8   | 0.094 | 0 Stro |
| SEPP1        | 0 | 1.71248  | 0.97  | 0.38  | 0 Stro |
| GNG11        | 0 | 1.69266  | 0.948 | 0.069 | 0 Stro |
| ECM1         | 0 | 1.68568  | 0.978 | 0.405 | 0 Stro |
| CXCL1        | 0 | 1.671857 | 0.361 | 0.092 | 0 Stro |
| FMOD         | 0 | 1.641864 | 0.843 | 0.016 | 0 Stro |
| IFITM2       | 0 | 1.637647 | 0.931 | 0.054 | 0 Stro |
| CXCL2        | 0 | 1.622186 | 0.689 | 0.154 | 0 Stro |
| C1R          | 0 | 1.601823 | 0.866 | 0.058 | 0 Stro |
| ANGPTL5      | 0 | 1.595967 | 0.88  | 0.007 | 0 Stro |
| COL1A2       | 0 | 1.593246 | 0.89  | 0.028 | 0 Stro |
| MGP          | 0 | 1.587745 | 0.768 | 0.031 | 0 Stro |
| TSC22D3      | 0 | 1.554278 | 0.988 | 0.802 | 0 Stro |
| EMP3         | 0 | 1.553625 | 0.966 | 0.157 | 0 Stro |
| MYOC         | 0 | 1.537255 | 0.578 | 0.013 | 0 Stro |
| CCL2         | 0 | 1.523184 | 0.594 | 0.013 | 0 Stro |
| F13A1        | 0 | 1.513697 | 0.835 | 0.008 | 0 Stro |
| GLT8D2       | 0 | 1.509901 | 0.903 | 0.009 | 0 Stro |
| LOX          | 0 | 1.493041 | 0.798 | 0.043 | 0 Stro |
| PPAP2B       | 0 | 1.473804 | 0.898 | 0.077 | 0 Stro |
| FAM3C        | 0 | 1.467667 | 0.935 | 0.248 | 0 Stro |
| FBLN5        | 0 | 1.460689 | 0.839 | 0.011 | 0 Stro |
| COL6A3       | 0 | 1.459169 | 0.877 | 0.008 | 0 Stro |
| CNN3         | 0 | 1.44337  | 0.929 | 0.26  | 0 Stro |
| ANXA5        | 0 | 1.431954 | 0.968 | 0.318 | 0 Stro |
| STEAP4       | 0 | 1.426728 | 0.826 | 0.021 | 0 Stro |
| LOC100506421 | 0 | 1.422205 | 0.815 | 0.017 | 0 Stro |
| CALD1        | 0 | 1.411217 | 0.929 | 0.175 | 0 Stro |
| FIBIN        | 0 | 1.409713 | 0.801 | 0.01  | 0 Stro |
| PRELP        | 0 | 1.407074 | 0.809 | 0.018 | 0 Stro |
| PRRX1        | 0 | 1.386009 | 0.863 | 0.01  | 0 Stro |
| TIMP2        | 0 | 1.3696   | 0.849 | 0.02  | 0 Stro |
| PGRMC1       | 0 | 1.364459 | 0.972 | 0.588 | 0 Stro |
| FTL          | 0 | 1.355099 | 1     | 0.995 | 0 Stro |
| DKK2         | 0 | 1.352322 | 0.854 | 0.005 | 0 Stro |
| C2orf40      | 0 | 1.333211 | 0.677 | 0.014 | 0 Stro |
| CTSF         | 0 | 1.329974 | 0.94  | 0.284 | 0 Stro |
| AKR1C2       | 0 | 1.314022 | 0.785 | 0.226 | 0 Stro |
| IFI6         | 0 | 1.311589 | 0.781 | 0.101 | 0 Stro |
| PDGFRL       | 0 | 1.30337  | 0.822 | 0.007 | 0 Stro |
| PTRF         | 0 | 1.298478 | 0.947 | 0.367 | 0 Stro |
| PRSS23       | 0 | 1.255217 | 0.812 | 0.123 | 0 Stro |
| TCF4         | 0 | 1.246746 | 0.822 | 0.023 | 0 Stro |

|           |   |          |       |       |        |
|-----------|---|----------|-------|-------|--------|
| QPCT      | 0 | 1.244766 | 0.815 | 0.031 | 0 Stro |
| LY6E      | 0 | 1.23342  | 0.954 | 0.47  | 0 Stro |
| MAMDC2    | 0 | 1.212191 | 0.814 | 0.056 | 0 Stro |
| RNASE4    | 0 | 1.207651 | 0.888 | 0.187 | 0 Stro |
| ID3       | 0 | 1.201012 | 0.968 | 0.723 | 0 Stro |
| AXL       | 0 | 1.182298 | 0.676 | 0.034 | 0 Stro |
| CPQ       | 0 | 1.17894  | 0.82  | 0.026 | 0 Stro |
| SPOCK1    | 0 | 1.176567 | 0.869 | 0.244 | 0 Stro |
| IL8       | 0 | 1.171191 | 0.383 | 0.059 | 0 Stro |
| TFAP2B    | 0 | 1.155708 | 0.776 | 0.015 | 0 Stro |
| CD99      | 0 | 1.155526 | 0.997 | 0.881 | 0 Stro |
| CCNI      | 0 | 1.139251 | 0.92  | 0.473 | 0 Stro |
| FHL1      | 0 | 1.135113 | 0.761 | 0.053 | 0 Stro |
| PDGFD     | 0 | 1.131396 | 0.794 | 0.048 | 0 Stro |
| CD34      | 0 | 1.122946 | 0.775 | 0.006 | 0 Stro |
| PAM       | 0 | 1.121463 | 0.748 | 0.047 | 0 Stro |
| SERPINE2  | 0 | 1.114948 | 0.747 | 0.037 | 0 Stro |
| HOXB-AS1  | 0 | 1.113225 | 0.693 | 0.004 | 0 Stro |
| IGFBP4    | 0 | 1.112119 | 0.746 | 0.107 | 0 Stro |
| LHFP      | 0 | 1.08858  | 0.825 | 0.146 | 0 Stro |
| SOCS3     | 0 | 1.084278 | 0.707 | 0.267 | 0 Stro |
| AKR1C1    | 0 | 1.083589 | 0.682 | 0.145 | 0 Stro |
| AEBP1     | 0 | 1.081855 | 0.75  | 0.01  | 0 Stro |
| EFHD1     | 0 | 1.08116  | 0.689 | 0.011 | 0 Stro |
| CYBRD1    | 0 | 1.077814 | 0.856 | 0.214 | 0 Stro |
| MT1M      | 0 | 1.059006 | 0.711 | 0.13  | 0 Stro |
| CLDN11    | 0 | 1.049512 | 0.582 | 0.006 | 0 Stro |
| MFGE8     | 0 | 1.045453 | 0.834 | 0.234 | 0 Stro |
| LARP6     | 0 | 1.044199 | 0.752 | 0.03  | 0 Stro |
| MAFB      | 0 | 1.039212 | 0.937 | 0.555 | 0 Stro |
| MMP2      | 0 | 1.024664 | 0.709 | 0.006 | 0 Stro |
| DAB2      | 0 | 1.023157 | 0.742 | 0.007 | 0 Stro |
| MME       | 0 | 1.011902 | 0.698 | 0.034 | 0 Stro |
| SBDS      | 0 | 0.999314 | 0.972 | 0.714 | 0 Stro |
| PITX2     | 0 | 0.995666 | 0.708 | 0.007 | 0 Stro |
| ASIP      | 0 | 0.99206  | 0.6   | 0.006 | 0 Stro |
| TUBA1A    | 0 | 0.991806 | 0.929 | 0.671 | 0 Stro |
| NDNF      | 0 | 0.988638 | 0.692 | 0.017 | 0 Stro |
| WBP5      | 0 | 0.982109 | 0.887 | 0.41  | 0 Stro |
| HSD11B1   | 0 | 0.977998 | 0.661 | 0.002 | 0 Stro |
| FXD1      | 0 | 0.969635 | 0.668 | 0.014 | 0 Stro |
| GAS6      | 0 | 0.967836 | 0.759 | 0.17  | 0 Stro |
| TMEM204   | 0 | 0.967827 | 0.699 | 0.059 | 0 Stro |
| MFAP4     | 0 | 0.967207 | 0.652 | 0.006 | 0 Stro |
| LSAMP     | 0 | 0.963555 | 0.674 | 0.008 | 0 Stro |
| NUCB2     | 0 | 0.963072 | 0.811 | 0.252 | 0 Stro |
| TNFRSF11B | 0 | 0.961262 | 0.579 | 0.003 | 0 Stro |
| B3GNT7    | 0 | 0.957562 | 0.505 | 0.027 | 0 Stro |

|           |   |          |       |       |        |
|-----------|---|----------|-------|-------|--------|
| RGCC      | 0 | 0.957453 | 0.546 | 0.041 | 0 Stro |
| LOC541471 | 0 | 0.9442   | 0.701 | 0.072 | 0 Stro |
| PCOLCE    | 0 | 0.943083 | 0.649 | 0.046 | 0 Stro |
| SMIM3     | 0 | 0.928059 | 0.729 | 0.088 | 0 Stro |
| LINC00152 | 0 | 0.92494  | 0.658 | 0.015 | 0 Stro |
| IFI27     | 0 | 0.922044 | 0.918 | 0.461 | 0 Stro |
| SEPT11    | 0 | 0.918669 | 0.682 | 0.034 | 0 Stro |
| JAM3      | 0 | 0.909508 | 0.675 | 0.035 | 0 Stro |
| CD59      | 0 | 0.900244 | 0.956 | 0.695 | 0 Stro |
| SDCBP     | 0 | 0.899343 | 0.916 | 0.502 | 0 Stro |
| PTGS2     | 0 | 0.893431 | 0.546 | 0.046 | 0 Stro |
| KDR       | 0 | 0.890961 | 0.602 | 0.004 | 0 Stro |
| COL8A1    | 0 | 0.890435 | 0.589 | 0.009 | 0 Stro |
| TWIST2    | 0 | 0.890101 | 0.654 | 0.005 | 0 Stro |
| SBDSP1    | 0 | 0.888681 | 0.934 | 0.589 | 0 Stro |
| NTN4      | 0 | 0.880939 | 0.628 | 0.007 | 0 Stro |
| MXRA8     | 0 | 0.878288 | 0.663 | 0.006 | 0 Stro |
| COLGALT2  | 0 | 0.877747 | 0.632 | 0.004 | 0 Stro |
| COL6A2    | 0 | 0.876948 | 0.656 | 0.005 | 0 Stro |
| COLEC12   | 0 | 0.868102 | 0.694 | 0.069 | 0 Stro |
| FXYD5     | 0 | 0.861098 | 0.699 | 0.059 | 0 Stro |
| GLUL      | 0 | 0.860305 | 1     | 0.947 | 0 Stro |
| FGFR1     | 0 | 0.855053 | 0.68  | 0.028 | 0 Stro |
| DPYSL2    | 0 | 0.850691 | 0.645 | 0.043 | 0 Stro |
| ACSL3     | 0 | 0.846352 | 0.769 | 0.268 | 0 Stro |
| PRKCDBP   | 0 | 0.843005 | 0.744 | 0.174 | 0 Stro |
| ABI3BP    | 0 | 0.841216 | 0.604 | 0.046 | 0 Stro |
| CD63      | 0 | 0.839619 | 0.997 | 0.977 | 0 Stro |
| ALDH3A1   | 0 | 0.83579  | 1     | 0.973 | 0 Stro |
| IRS2      | 0 | 0.83562  | 0.678 | 0.107 | 0 Stro |
| SPARC     | 0 | 0.835227 | 0.93  | 0.368 | 0 Stro |
| ARRDC3    | 0 | 0.81635  | 0.653 | 0.223 | 0 Stro |
| CTSK      | 0 | 0.809464 | 0.619 | 0.023 | 0 Stro |
| C1QTNF3   | 0 | 0.809171 | 0.473 | 0.008 | 0 Stro |
| GGT5      | 0 | 0.806618 | 0.528 | 0.005 | 0 Stro |
| GSTM3     | 0 | 0.800725 | 0.71  | 0.146 | 0 Stro |
| THBS1     | 0 | 0.794393 | 0.611 | 0.099 | 0 Stro |
| CEBPD     | 0 | 0.793532 | 0.825 | 0.562 | 0 Stro |
| PCOLCE2   | 0 | 0.781054 | 0.541 | 0.038 | 0 Stro |
| ID2       | 0 | 0.780884 | 0.852 | 0.507 | 0 Stro |
| SLC2A3    | 0 | 0.780516 | 0.564 | 0.026 | 0 Stro |
| LAPTM4A   | 0 | 0.77428  | 0.998 | 0.966 | 0 Stro |
| SUN2      | 0 | 0.773436 | 0.727 | 0.24  | 0 Stro |
| FSTL1     | 0 | 0.76922  | 0.583 | 0.052 | 0 Stro |
| PLSCR4    | 0 | 0.769038 | 0.602 | 0.016 | 0 Stro |
| ARPC5     | 0 | 0.766546 | 0.77  | 0.281 | 0 Stro |
| VMO1      | 0 | 0.766421 | 0.387 | 0.032 | 0 Stro |
| WASF2     | 0 | 0.763578 | 0.764 | 0.307 | 0 Stro |

|          |   |          |       |       |        |
|----------|---|----------|-------|-------|--------|
| UBL3     | 0 | 0.754353 | 0.702 | 0.236 | 0 Stro |
| MAFF     | 0 | 0.751442 | 0.778 | 0.379 | 0 Stro |
| APLP2    | 0 | 0.750057 | 0.965 | 0.793 | 0 Stro |
| PSAP     | 0 | 0.749464 | 0.997 | 0.946 | 0 Stro |
| MT1E     | 0 | 0.74886  | 0.881 | 0.607 | 0 Stro |
| COL5A2   | 0 | 0.744953 | 0.564 | 0.027 | 0 Stro |
| ZFP36L2  | 0 | 0.737201 | 0.845 | 0.465 | 0 Stro |
| FKBP9    | 0 | 0.736059 | 0.571 | 0.084 | 0 Stro |
| RGS16    | 0 | 0.735956 | 0.468 | 0.131 | 0 Stro |
| CCK      | 0 | 0.732662 | 0.47  | 0.056 | 0 Stro |
| PIGT     | 0 | 0.724329 | 0.759 | 0.335 | 0 Stro |
| ARF4     | 0 | 0.722875 | 0.962 | 0.804 | 0 Stro |
| AK057379 | 0 | 0.721277 | 0.539 | 0.017 | 0 Stro |
| PLD3     | 0 | 0.715654 | 0.856 | 0.492 | 0 Stro |
| CRIP2    | 0 | 0.711597 | 0.662 | 0.14  | 0 Stro |
| XBP1     | 0 | 0.707324 | 0.793 | 0.452 | 0 Stro |
| RCN3     | 0 | 0.705096 | 0.566 | 0.009 | 0 Stro |
| ZFHx4    | 0 | 0.701958 | 0.544 | 0.007 | 0 Stro |
| FBLN2    | 0 | 0.694961 | 0.542 | 0.066 | 0 Stro |
| EIF5     | 0 | 0.690084 | 0.902 | 0.688 | 0 Stro |
| ARHGAP29 | 0 | 0.689139 | 0.569 | 0.04  | 0 Stro |
| C7orf10  | 0 | 0.688958 | 0.662 | 0.231 | 0 Stro |
| AHR      | 0 | 0.688627 | 0.609 | 0.134 | 0 Stro |
| BGN      | 0 | 0.68621  | 0.523 | 0.187 | 0 Stro |
| TMEM55A  | 0 | 0.683033 | 0.576 | 0.06  | 0 Stro |
| DSTN     | 0 | 0.680598 | 0.986 | 0.926 | 0 Stro |
| TRAM1    | 0 | 0.666719 | 0.762 | 0.386 | 0 Stro |
| AKR1B1   | 0 | 0.666457 | 0.821 | 0.404 | 0 Stro |
| SVIL     | 0 | 0.666329 | 0.649 | 0.22  | 0 Stro |
| FKBP10   | 0 | 0.665933 | 0.544 | 0.012 | 0 Stro |
| CYR61    | 0 | 0.663731 | 0.521 | 0.052 | 0 Stro |
| WNT5A    | 0 | 0.657189 | 0.523 | 0.031 | 0 Stro |
| TMEM106C | 0 | 0.656138 | 0.65  | 0.199 | 0 Stro |
| COX7A1   | 0 | 0.655855 | 0.878 | 0.413 | 0 Stro |
| HPGD     | 0 | 0.654308 | 0.472 | 0.116 | 0 Stro |
| CTNNAL1  | 0 | 0.650835 | 0.625 | 0.157 | 0 Stro |
| AMD1     | 0 | 0.649976 | 0.714 | 0.382 | 0 Stro |
| ITSN1    | 0 | 0.649178 | 0.568 | 0.086 | 0 Stro |
| ZBTB20   | 0 | 0.645292 | 0.573 | 0.077 | 0 Stro |
| ZFHx3    | 0 | 0.643019 | 0.553 | 0.064 | 0 Stro |
| ACTN1    | 0 | 0.635706 | 0.569 | 0.098 | 0 Stro |
| TSPAN4   | 0 | 0.634968 | 0.638 | 0.187 | 0 Stro |
| APP      | 0 | 0.634256 | 0.868 | 0.514 | 0 Stro |
| XG       | 0 | 0.631817 | 0.621 | 0.192 | 0 Stro |
| ABCA6    | 0 | 0.631304 | 0.49  | 0.003 | 0 Stro |
| CDC42EP2 | 0 | 0.63049  | 0.474 | 0.018 | 0 Stro |
| C19orf10 | 0 | 0.629701 | 0.838 | 0.554 | 0 Stro |
| EMX2     | 0 | 0.627816 | 0.66  | 0.202 | 0 Stro |

|              |   |          |       |       |        |
|--------------|---|----------|-------|-------|--------|
| DPP7         | 0 | 0.627702 | 0.775 | 0.422 | 0 Stro |
| ENPP1        | 0 | 0.627105 | 0.453 | 0.004 | 0 Stro |
| SNAI1        | 0 | 0.626013 | 0.49  | 0.073 | 0 Stro |
| TIPARP       | 0 | 0.618975 | 0.654 | 0.329 | 0 Stro |
| DAP          | 0 | 0.616559 | 0.778 | 0.431 | 0 Stro |
| SSR4         | 0 | 0.616171 | 0.954 | 0.885 | 0 Stro |
| LOC100505806 | 0 | 0.615827 | 0.69  | 0.29  | 0 Stro |
| PDLIM2       | 0 | 0.614044 | 0.583 | 0.135 | 0 Stro |
| VAMP5        | 0 | 0.613247 | 0.542 | 0.061 | 0 Stro |
| PARVA        | 0 | 0.612096 | 0.568 | 0.104 | 0 Stro |
| MAP1B        | 0 | 0.610503 | 0.455 | 0.005 | 0 Stro |
| SERPINI1     | 0 | 0.607887 | 0.524 | 0.069 | 0 Stro |
| CDC42EP3     | 0 | 0.60757  | 0.532 | 0.069 | 0 Stro |
| APCDD1       | 0 | 0.605674 | 0.442 | 0.028 | 0 Stro |
| RTN4         | 0 | 0.604401 | 0.972 | 0.882 | 0 Stro |
| CTSL1        | 0 | 0.60388  | 0.778 | 0.444 | 0 Stro |
| C1QTNF7      | 0 | 0.5978   | 0.423 | 0.003 | 0 Stro |
| FN1          | 0 | 0.595496 | 0.365 | 0.006 | 0 Stro |
| CALU         | 0 | 0.592912 | 0.643 | 0.248 | 0 Stro |
| SERPINA3     | 0 | 0.592287 | 0.3   | 0.003 | 0 Stro |
| ANXA1        | 0 | 0.591452 | 0.999 | 0.981 | 0 Stro |
| TFPI         | 0 | 0.590008 | 0.456 | 0.004 | 0 Stro |
| CHEK2        | 0 | 0.586033 | 0.485 | 0.048 | 0 Stro |
| CRNDE        | 0 | 0.585889 | 0.726 | 0.289 | 0 Stro |
| PLOD1        | 0 | 0.585528 | 0.529 | 0.094 | 0 Stro |
| RRBP1        | 0 | 0.5823   | 0.669 | 0.29  | 0 Stro |
| FKBP7        | 0 | 0.580821 | 0.51  | 0.046 | 0 Stro |
| SEC63        | 0 | 0.580291 | 0.768 | 0.442 | 0 Stro |
| TWIST1       | 0 | 0.57672  | 0.404 | 0.002 | 0 Stro |
| TCN2         | 0 | 0.571166 | 0.468 | 0.043 | 0 Stro |
| ZEB1         | 0 | 0.567484 | 0.448 | 0.004 | 0 Stro |
| ITGB1        | 0 | 0.563661 | 0.854 | 0.558 | 0 Stro |
| DPYSL3       | 0 | 0.561265 | 0.475 | 0.032 | 0 Stro |
| PHLDA1       | 0 | 0.56027  | 0.537 | 0.148 | 0 Stro |
| FOXO3        | 0 | 0.558632 | 0.523 | 0.081 | 0 Stro |
| LIMA1        | 0 | 0.557199 | 0.628 | 0.278 | 0 Stro |
| GTF3C5       | 0 | 0.551342 | 0.614 | 0.271 | 0 Stro |
| SEMA5A       | 0 | 0.551105 | 0.409 | 0.02  | 0 Stro |
| ITGB1BP1     | 0 | 0.545037 | 0.688 | 0.369 | 0 Stro |
| CLEC11A      | 0 | 0.544711 | 0.583 | 0.211 | 0 Stro |
| ICAM1        | 0 | 0.542071 | 0.391 | 0.015 | 0 Stro |
| ANGPTL2      | 0 | 0.540315 | 0.451 | 0.042 | 0 Stro |
| SNRPN        | 0 | 0.539484 | 0.813 | 0.543 | 0 Stro |
| HOXB2        | 0 | 0.536689 | 0.397 | 0.002 | 0 Stro |
| SEC62        | 0 | 0.536289 | 0.952 | 0.826 | 0 Stro |
| PDK4         | 0 | 0.536123 | 0.355 | 0.01  | 0 Stro |
| MSRB3        | 0 | 0.535395 | 0.434 | 0.008 | 0 Stro |
| EID1         | 0 | 0.535304 | 0.974 | 0.867 | 0 Stro |

|             |   |          |       |       |        |
|-------------|---|----------|-------|-------|--------|
| PDIA3       | 0 | 0.532665 | 0.938 | 0.803 | 0 Stro |
| OLFML1      | 0 | 0.531163 | 0.37  | 0.002 | 0 Stro |
| A1BG        | 0 | 0.530965 | 0.447 | 0.013 | 0 Stro |
| PTMA        | 0 | 0.529733 | 1     | 0.995 | 0 Stro |
| KCTD12      | 0 | 0.529266 | 0.427 | 0.02  | 0 Stro |
| EEF2        | 0 | 0.528244 | 0.964 | 0.858 | 0 Stro |
| ALCAM       | 0 | 0.527832 | 0.439 | 0.036 | 0 Stro |
| LRP1        | 0 | 0.526555 | 0.56  | 0.199 | 0 Stro |
| C1orf21     | 0 | 0.526514 | 0.673 | 0.344 | 0 Stro |
| TCF12       | 0 | 0.523766 | 0.504 | 0.098 | 0 Stro |
| HSP90B1     | 0 | 0.522851 | 0.958 | 0.8   | 0 Stro |
| DNAJB9      | 0 | 0.522687 | 0.687 | 0.369 | 0 Stro |
| BCAP29      | 0 | 0.521966 | 0.569 | 0.215 | 0 Stro |
| LRPAP1      | 0 | 0.521584 | 0.859 | 0.655 | 0 Stro |
| F2R         | 0 | 0.521554 | 0.367 | 0.03  | 0 Stro |
| VASN        | 0 | 0.521064 | 0.414 | 0.045 | 0 Stro |
| MAGED2      | 0 | 0.516984 | 0.692 | 0.376 | 0 Stro |
| HSD17B12    | 0 | 0.51543  | 0.633 | 0.292 | 0 Stro |
| SEPT7       | 0 | 0.515288 | 0.918 | 0.749 | 0 Stro |
| VKORC1      | 0 | 0.513482 | 0.674 | 0.364 | 0 Stro |
| RAB32       | 0 | 0.513082 | 0.496 | 0.102 | 0 Stro |
| SERPIN6     | 0 | 0.512144 | 0.59  | 0.211 | 0 Stro |
| HSD17B11    | 0 | 0.510908 | 0.484 | 0.051 | 0 Stro |
| ANPEP       | 0 | 0.50939  | 0.399 | 0.003 | 0 Stro |
| GPX8        | 0 | 0.508826 | 0.493 | 0.099 | 0 Stro |
| CTS2        | 0 | 0.508312 | 0.486 | 0.077 | 0 Stro |
| CD163L1     | 0 | 0.507205 | 0.419 | 0.002 | 0 Stro |
| PLA2G5      | 0 | 0.504384 | 0.366 | 0.003 | 0 Stro |
| EMCN        | 0 | 0.504301 | 0.391 | 0.003 | 0 Stro |
| IFI27L2     | 0 | 0.503325 | 0.679 | 0.322 | 0 Stro |
| SFRP1       | 0 | 0.501787 | 0.345 | 0.009 | 0 Stro |
| COL8A2      | 0 | 0.501537 | 0.413 | 0.004 | 0 Stro |
| ACYP1       | 0 | 0.499995 | 0.626 | 0.302 | 0 Stro |
| RHOBTB3     | 0 | 0.499575 | 0.527 | 0.154 | 0 Stro |
| QSOX1       | 0 | 0.49801  | 0.469 | 0.075 | 0 Stro |
| SNHG6       | 0 | 0.497678 | 0.901 | 0.735 | 0 Stro |
| HEXB        | 0 | 0.496365 | 0.693 | 0.384 | 0 Stro |
| LOC284998   | 0 | 0.496184 | 0.37  | 0.002 | 0 Stro |
| INMT        | 0 | 0.495967 | 0.303 | 0.005 | 0 Stro |
| LOXL1       | 0 | 0.49592  | 0.416 | 0.048 | 0 Stro |
| MYL9        | 0 | 0.495391 | 0.425 | 0.029 | 0 Stro |
| AMOTL2      | 0 | 0.493249 | 0.432 | 0.076 | 0 Stro |
| SERTAD4-AS1 | 0 | 0.492682 | 0.495 | 0.126 | 0 Stro |
| DNAJC3      | 0 | 0.489069 | 0.558 | 0.232 | 0 Stro |
| AK4         | 0 | 0.488846 | 0.46  | 0.07  | 0 Stro |
| RAB11FIP2   | 0 | 0.488778 | 0.423 | 0.057 | 0 Stro |
| CCDC151     | 0 | 0.487855 | 0.406 | 0.02  | 0 Stro |
| WFDC1       | 0 | 0.487618 | 0.368 | 0.002 | 0 Stro |



|           |   |          |       |       |        |
|-----------|---|----------|-------|-------|--------|
| C14orf132 | 0 | 0.485567 | 0.429 | 0.033 | 0 Stro |
| AKAP13    | 0 | 0.48463  | 0.498 | 0.123 | 0 Stro |
| LAMB2     | 0 | 0.481684 | 0.453 | 0.092 | 0 Stro |
| SEMA3B    | 0 | 0.481171 | 0.411 | 0.029 | 0 Stro |
| ITGB4     | 0 | 0.480731 | 0.499 | 0.17  | 0 Stro |
| HIBADH    | 0 | 0.475383 | 0.574 | 0.243 | 0 Stro |
| GLT8D1    | 0 | 0.474553 | 0.548 | 0.224 | 0 Stro |
| EDNRB     | 0 | 0.472991 | 0.39  | 0.065 | 0 Stro |
| IL32      | 0 | 0.468359 | 0.364 | 0.024 | 0 Stro |
| TCEAL3    | 0 | 0.466154 | 0.489 | 0.139 | 0 Stro |
| FAM126A   | 0 | 0.46575  | 0.398 | 0.028 | 0 Stro |
| CHPT1     | 0 | 0.465501 | 0.405 | 0.024 | 0 Stro |
| CERS2     | 0 | 0.46518  | 0.546 | 0.201 | 0 Stro |
| MGAT1     | 0 | 0.463107 | 0.593 | 0.267 | 0 Stro |
| COL1A1    | 0 | 0.460908 | 0.354 | 0.012 | 0 Stro |
| SLC26A4   | 0 | 0.459917 | 0.322 | 0.005 | 0 Stro |
| TMEM45A   | 0 | 0.459516 | 0.469 | 0.11  | 0 Stro |
| FAM229B   | 0 | 0.458485 | 0.472 | 0.109 | 0 Stro |
| HLA-E     | 0 | 0.454788 | 0.957 | 0.872 | 0 Stro |
| SAA2      | 0 | 0.451555 | 0.261 | 0.003 | 0 Stro |
| MAGI2-AS3 | 0 | 0.449531 | 0.391 | 0.018 | 0 Stro |
| PLOD2     | 0 | 0.448966 | 0.378 | 0.023 | 0 Stro |
| IL6ST     | 0 | 0.444468 | 0.46  | 0.113 | 0 Stro |
| NPC2      | 0 | 0.44025  | 0.955 | 0.854 | 0 Stro |
| NT5E      | 0 | 0.436656 | 0.369 | 0.007 | 0 Stro |
| F10       | 0 | 0.435533 | 0.337 | 0.002 | 0 Stro |
| NANOS1    | 0 | 0.434427 | 0.35  | 0.006 | 0 Stro |
| PDLIM4    | 0 | 0.434114 | 0.553 | 0.202 | 0 Stro |
| CXCL3     | 0 | 0.432901 | 0.292 | 0.051 | 0 Stro |
| SLC39A13  | 0 | 0.428399 | 0.435 | 0.087 | 0 Stro |
| TMEM98    | 0 | 0.427999 | 0.462 | 0.116 | 0 Stro |
| CHST6     | 0 | 0.427951 | 0.341 | 0.006 | 0 Stro |
| TMEM59    | 0 | 0.426355 | 0.988 | 0.95  | 0 Stro |
| ARMCX3    | 0 | 0.425338 | 0.415 | 0.06  | 0 Stro |
| ALDH1A3   | 0 | 0.424998 | 0.366 | 0.064 | 0 Stro |
| CDKN1C    | 0 | 0.424016 | 0.449 | 0.11  | 0 Stro |
| TMEM64    | 0 | 0.42377  | 0.377 | 0.022 | 0 Stro |
| SYNE1     | 0 | 0.418725 | 0.395 | 0.072 | 0 Stro |
| P4HA2     | 0 | 0.418712 | 0.503 | 0.177 | 0 Stro |
| PGM2L1    | 0 | 0.418511 | 0.387 | 0.053 | 0 Stro |
| ANKH      | 0 | 0.415984 | 0.415 | 0.095 | 0 Stro |
| SUSD2     | 0 | 0.415148 | 0.325 | 0.004 | 0 Stro |
| FBLN7     | 0 | 0.41216  | 0.342 | 0.005 | 0 Stro |
| ZBTB16    | 0 | 0.407778 | 0.357 | 0.028 | 0 Stro |
| GPC4      | 0 | 0.406841 | 0.345 | 0.019 | 0 Stro |
| MSN       | 0 | 0.406721 | 0.392 | 0.051 | 0 Stro |
| LSP1      | 0 | 0.404947 | 0.703 | 0.263 | 0 Stro |
| CYB5R2    | 0 | 0.404163 | 0.353 | 0.069 | 0 Stro |

|          |   |          |       |       |        |
|----------|---|----------|-------|-------|--------|
| PLIN2    | 0 | 0.403281 | 0.395 | 0.105 | 0 Stro |
| LDHA     | 0 | 0.402992 | 0.999 | 0.989 | 0 Stro |
| C1orf198 | 0 | 0.402987 | 0.363 | 0.047 | 0 Stro |
| CHN1     | 0 | 0.402018 | 0.299 | 0.002 | 0 Stro |
| CHSY1    | 0 | 0.401969 | 0.357 | 0.036 | 0 Stro |
| DCLK1    | 0 | 0.400362 | 0.279 | 0.005 | 0 Stro |
| ADAM33   | 0 | 0.400244 | 0.328 | 0.004 | 0 Stro |
| RECK     | 0 | 0.399994 | 0.336 | 0.007 | 0 Stro |
| ISLR     | 0 | 0.398994 | 0.308 | 0.006 | 0 Stro |
| SEC22C   | 0 | 0.397277 | 0.44  | 0.115 | 0 Stro |
| KDELR3   | 0 | 0.395454 | 0.328 | 0.009 | 0 Stro |
| CHST7    | 0 | 0.394067 | 0.335 | 0.026 | 0 Stro |
| AK125699 | 0 | 0.393835 | 0.335 | 0.015 | 0 Stro |
| CMTM3    | 0 | 0.391222 | 0.361 | 0.039 | 0 Stro |
| NR3C1    | 0 | 0.390616 | 0.422 | 0.118 | 0 Stro |
| HGF      | 0 | 0.388816 | 0.288 | 0.003 | 0 Stro |
| CFL2     | 0 | 0.388808 | 0.369 | 0.051 | 0 Stro |
| FERMT2   | 0 | 0.384627 | 0.312 | 0.005 | 0 Stro |
| IL13RA1  | 0 | 0.383904 | 0.387 | 0.077 | 0 Stro |
| NTRK3    | 0 | 0.383259 | 0.314 | 0.002 | 0 Stro |
| MXRA5    | 0 | 0.382583 | 0.288 | 0.034 | 0 Stro |
| ANG      | 0 | 0.376882 | 0.415 | 0.115 | 0 Stro |
| SLC9A3R2 | 0 | 0.376801 | 0.343 | 0.033 | 0 Stro |
| EPB41L2  | 0 | 0.375814 | 0.33  | 0.021 | 0 Stro |
| SLC22A4  | 0 | 0.37579  | 0.323 | 0.011 | 0 Stro |
| FLNA     | 0 | 0.375626 | 0.397 | 0.102 | 0 Stro |
| CCDC107  | 0 | 0.373319 | 0.415 | 0.116 | 0 Stro |
| ZNF106   | 0 | 0.370837 | 0.384 | 0.077 | 0 Stro |
| SYBU     | 0 | 0.370664 | 0.307 | 0.01  | 0 Stro |
| PFKFB3   | 0 | 0.370328 | 0.331 | 0.073 | 0 Stro |
| CRY1     | 0 | 0.369783 | 0.333 | 0.068 | 0 Stro |
| MAGEH1   | 0 | 0.368605 | 0.389 | 0.083 | 0 Stro |
| C4orf48  | 0 | 0.367945 | 0.404 | 0.111 | 0 Stro |
| VOPP1    | 0 | 0.364095 | 0.367 | 0.067 | 0 Stro |
| NFIX     | 0 | 0.363767 | 0.375 | 0.089 | 0 Stro |
| C12orf23 | 0 | 0.362868 | 0.36  | 0.073 | 0 Stro |
| ADAMTS1  | 0 | 0.362058 | 0.273 | 0.013 | 0 Stro |
| SLC44A1  | 0 | 0.358926 | 0.357 | 0.068 | 0 Stro |
| SRPX2    | 0 | 0.357931 | 0.293 | 0.023 | 0 Stro |
| CREB3L2  | 0 | 0.354529 | 0.393 | 0.11  | 0 Stro |
| IL11RA   | 0 | 0.3542   | 0.308 | 0.025 | 0 Stro |
| MGLL     | 0 | 0.353273 | 0.374 | 0.075 | 0 Stro |
| SASH1    | 0 | 0.350898 | 0.386 | 0.103 | 0 Stro |
| GOS2     | 0 | 0.350373 | 0.341 | 0.029 | 0 Stro |
| LRIG1    | 0 | 0.349729 | 0.329 | 0.056 | 0 Stro |
| CFB      | 0 | 0.349562 | 0.325 | 0.07  | 0 Stro |
| EFEMP2   | 0 | 0.348787 | 0.324 | 0.032 | 0 Stro |
| GYPE     | 0 | 0.347228 | 0.325 | 0.018 | 0 Stro |

|           |           |          |       |       |           |      |
|-----------|-----------|----------|-------|-------|-----------|------|
| TWSG1     | 0         | 0.346716 | 0.348 | 0.065 | 0         | Stro |
| CD97      | 0         | 0.346657 | 0.32  | 0.035 | 0         | Stro |
| GRK5      | 0         | 0.342114 | 0.291 | 0.004 | 0         | Stro |
| GSTM5     | 0         | 0.341758 | 0.28  | 0.002 | 0         | Stro |
| LY96      | 0         | 0.341319 | 0.295 | 0.01  | 0         | Stro |
| WBP1L     | 0         | 0.338992 | 0.346 | 0.076 | 0         | Stro |
| ITGB5     | 0         | 0.3384   | 0.321 | 0.066 | 0         | Stro |
| COP2      | 0         | 0.337764 | 0.34  | 0.074 | 0         | Stro |
| HEG1      | 0         | 0.337707 | 0.292 | 0.018 | 0         | Stro |
| MAP1A     | 0         | 0.337178 | 0.274 | 0.005 | 0         | Stro |
| NLGN4X    | 0         | 0.337084 | 0.306 | 0.03  | 0         | Stro |
| SESN3     | 0         | 0.336427 | 0.31  | 0.034 | 0         | Stro |
| SLC39A14  | 0         | 0.336189 | 0.305 | 0.05  | 0         | Stro |
| PDGFRA    | 0         | 0.335669 | 0.277 | 0.006 | 0         | Stro |
| NEBL      | 0         | 0.334948 | 0.353 | 0.08  | 0         | Stro |
| GALNT6    | 0         | 0.334948 | 0.292 | 0.019 | 0         | Stro |
| CDC42BPA  | 0         | 0.334649 | 0.32  | 0.047 | 0         | Stro |
| CDON      | 0         | 0.331753 | 0.273 | 0.009 | 0         | Stro |
| TPM2      | 0         | 0.33056  | 0.303 | 0.018 | 0         | Stro |
| MRGPRF    | 0         | 0.330486 | 0.274 | 0.003 | 0         | Stro |
| GOLIM4    | 0         | 0.326337 | 0.314 | 0.062 | 0         | Stro |
| ERG       | 0         | 0.322533 | 0.272 | 0.003 | 0         | Stro |
| TP53I11   | 0         | 0.322011 | 0.289 | 0.024 | 0         | Stro |
| SEPT4     | 0         | 0.316276 | 0.267 | 0.008 | 0         | Stro |
| CD320     | 0         | 0.313048 | 0.309 | 0.051 | 0         | Stro |
| ARMCX1    | 0         | 0.312917 | 0.298 | 0.036 | 0         | Stro |
| IRX1      | 0         | 0.311233 | 0.265 | 0.001 | 0         | Stro |
| B3GNT1    | 0         | 0.311117 | 0.323 | 0.068 | 0         | Stro |
| PLCD3     | 0         | 0.309447 | 0.3   | 0.053 | 0         | Stro |
| COL4A3    | 0         | 0.308037 | 0.27  | 0.01  | 0         | Stro |
| AXIN2     | 0         | 0.307966 | 0.256 | 0.006 | 0         | Stro |
| LURAP1L   | 0         | 0.306766 | 0.255 | 0.008 | 0         | Stro |
| FAM65B    | 0         | 0.306318 | 0.262 | 0.004 | 0         | Stro |
| ADAMTS12  | 0         | 0.304064 | 0.253 | 0.002 | 0         | Stro |
| BMP4      | 0         | 0.303982 | 0.264 | 0.013 | 0         | Stro |
| AP1S2     | 0         | 0.30254  | 0.331 | 0.075 | 0         | Stro |
| DIO2      | 0         | 0.301981 | 0.253 | 0.041 | 0         | Stro |
| ANXA6     | 0         | 0.301618 | 0.274 | 0.007 | 0         | Stro |
| SEC23A    | 0         | 0.301429 | 0.306 | 0.058 | 0         | Stro |
| P4HA1     | 0         | 0.299887 | 0.3   | 0.057 | 0         | Stro |
| ST3GAL5   | 0         | 0.297561 | 0.269 | 0.012 | 0         | Stro |
| RBMS3     | 0         | 0.296488 | 0.253 | 0.008 | 0         | Stro |
| LOC728392 | 0         | 0.293594 | 0.252 | 0.031 | 0         | Stro |
| NCAM1     | 0         | 0.293114 | 0.251 | 0.011 | 0         | Stro |
| NAAA      | 0         | 0.276465 | 0.283 | 0.052 | 0         | Stro |
| TGFBR3    | 0         | 0.261219 | 0.251 | 0.025 | 0         | Stro |
| TULP3     | 2.19E-301 | 0.332157 | 0.355 | 0.093 | 3.98E-297 | Stro |
| COX11     | 4.79E-301 | 0.50097  | 0.63  | 0.327 | 8.72E-297 | Stro |

|          |           |          |       |       |           |      |
|----------|-----------|----------|-------|-------|-----------|------|
| NDN      | 1.40E-300 | 0.450119 | 0.607 | 0.287 | 2.55E-296 | Stro |
| RAB34    | 4.09E-299 | 0.468945 | 0.696 | 0.39  | 7.44E-295 | Stro |
| IRX2     | 1.24E-298 | 0.282622 | 0.287 | 0.058 | 2.26E-294 | Stro |
| KLF9     | 4.02E-297 | 0.429874 | 0.509 | 0.194 | 7.32E-293 | Stro |
| MT1A     | 1.71E-291 | 0.442873 | 0.279 | 0.057 | 3.11E-287 | Stro |
| TMED2    | 9.65E-291 | 0.470597 | 0.906 | 0.761 | 1.76E-286 | Stro |
| ETV5     | 9.87E-288 | 0.268705 | 0.27  | 0.053 | 1.80E-283 | Stro |
| BC016015 | 3.31E-285 | 0.334885 | 0.334 | 0.084 | 6.03E-281 | Stro |
| ABL2     | 1.32E-284 | 0.302803 | 0.286 | 0.061 | 2.41E-280 | Stro |
| ADD3     | 4.67E-284 | 0.374925 | 0.428 | 0.142 | 8.51E-280 | Stro |
| CPXM2    | 1.57E-282 | 0.521308 | 0.703 | 0.396 | 2.86E-278 | Stro |
| IGFBP2   | 1.26E-281 | 0.677868 | 0.766 | 0.518 | 2.29E-277 | Stro |
| TMEM9    | 1.48E-280 | 0.46669  | 0.631 | 0.335 | 2.69E-276 | Stro |
| SOD2     | 3.85E-280 | 0.772157 | 0.57  | 0.277 | 7.02E-276 | Stro |
| ZFAND5   | 1.54E-279 | 0.555055 | 0.85  | 0.631 | 2.80E-275 | Stro |
| KIAA1033 | 1.61E-276 | 0.268314 | 0.281 | 0.06  | 2.93E-272 | Stro |
| SGCB     | 1.31E-275 | 0.274177 | 0.288 | 0.064 | 2.38E-271 | Stro |
| INSIG2   | 2.21E-274 | 0.339665 | 0.374 | 0.112 | 4.03E-270 | Stro |
| REXO2    | 3.74E-274 | 0.491321 | 0.804 | 0.589 | 6.80E-270 | Stro |
| NENF     | 5.78E-274 | 0.460297 | 0.854 | 0.687 | 1.05E-269 | Stro |
| CANX     | 4.22E-273 | 0.487448 | 0.803 | 0.574 | 7.68E-269 | Stro |
| RECQL    | 4.15E-272 | 0.313897 | 0.338 | 0.09  | 7.56E-268 | Stro |
| RP9P     | 4.54E-270 | 0.272643 | 0.255 | 0.05  | 8.26E-266 | Stro |
| ERRFI1   | 6.40E-270 | 0.518098 | 0.557 | 0.254 | 1.17E-265 | Stro |
| SLC20A1  | 4.26E-267 | 0.482775 | 0.697 | 0.382 | 7.76E-263 | Stro |
| HSPA13   | 2.77E-266 | 0.250672 | 0.264 | 0.055 | 5.05E-262 | Stro |
| SYNC     | 7.73E-266 | 0.337408 | 0.419 | 0.142 | 1.41E-261 | Stro |
| MID1IP1  | 3.71E-265 | 0.471621 | 0.561 | 0.27  | 6.76E-261 | Stro |
| AKR1C3   | 4.93E-265 | 0.32775  | 0.319 | 0.081 | 8.97E-261 | Stro |
| SEC61G   | 8.39E-263 | 0.402052 | 0.965 | 0.896 | 1.53E-258 | Stro |
| EEF1A1   | 1.46E-262 | 0.292258 | 1     | 0.999 | 2.65E-258 | Stro |
| METTL7A  | 3.25E-262 | 0.423935 | 0.538 | 0.239 | 5.91E-258 | Stro |
| DNAJC10  | 1.07E-259 | 0.258964 | 0.269 | 0.058 | 1.95E-255 | Stro |
| FNDC3A   | 1.13E-258 | 0.279705 | 0.311 | 0.08  | 2.06E-254 | Stro |
| POLR2L   | 1.36E-258 | 0.366916 | 0.987 | 0.962 | 2.47E-254 | Stro |
| TTC3     | 2.62E-257 | 0.420157 | 0.53  | 0.237 | 4.77E-253 | Stro |
| TTC28    | 1.42E-256 | 0.378845 | 0.467 | 0.186 | 2.58E-252 | Stro |
| PPAPDC1B | 1.25E-255 | 0.373131 | 0.433 | 0.16  | 2.27E-251 | Stro |
| GLG1     | 6.52E-254 | 0.342489 | 0.39  | 0.13  | 1.19E-249 | Stro |
| HSP90AB1 | 3.60E-252 | 0.382652 | 0.988 | 0.959 | 6.55E-248 | Stro |
| ERLEC1   | 2.16E-248 | 0.42787  | 0.559 | 0.273 | 3.94E-244 | Stro |
| TMCO3    | 3.00E-248 | 0.309852 | 0.349 | 0.105 | 5.46E-244 | Stro |
| CDK5RAP2 | 4.71E-247 | 0.270273 | 0.29  | 0.072 | 8.57E-243 | Stro |
| STMN1    | 4.88E-246 | 0.260124 | 0.45  | 0.164 | 8.89E-242 | Stro |
| OAT      | 1.02E-245 | 0.418678 | 0.633 | 0.337 | 1.86E-241 | Stro |
| RBMS1    | 7.06E-245 | 0.332291 | 0.396 | 0.137 | 1.29E-240 | Stro |
| OS9      | 1.30E-244 | 0.453652 | 0.804 | 0.613 | 2.37E-240 | Stro |
| C16orf45 | 8.27E-244 | 0.284562 | 0.299 | 0.078 | 1.51E-239 | Stro |

|           |           |          |       |       |           |      |
|-----------|-----------|----------|-------|-------|-----------|------|
| C9orf3    | 5.32E-243 | 0.410818 | 0.567 | 0.281 | 9.68E-239 | Stro |
| CHPF      | 2.04E-242 | 0.438933 | 0.538 | 0.26  | 3.72E-238 | Stro |
| TSPYL2    | 3.10E-242 | 0.405163 | 0.484 | 0.202 | 5.64E-238 | Stro |
| PTPRS     | 3.55E-242 | 0.403318 | 0.284 | 0.071 | 6.47E-238 | Stro |
| TMBIM1    | 5.74E-242 | 0.458235 | 0.781 | 0.571 | 1.05E-237 | Stro |
| PPT1      | 4.57E-241 | 0.453986 | 0.785 | 0.546 | 8.33E-237 | Stro |
| B4GALT1   | 1.04E-240 | 0.484295 | 0.327 | 0.096 | 1.90E-236 | Stro |
| FCGRT     | 1.35E-240 | 0.367561 | 0.562 | 0.266 | 2.45E-236 | Stro |
| CRTAP     | 3.32E-240 | 0.37424  | 0.51  | 0.227 | 6.05E-236 | Stro |
| NUDT4     | 7.06E-238 | 0.365542 | 0.435 | 0.169 | 1.29E-233 | Stro |
| YBX1      | 4.15E-237 | 0.319537 | 0.995 | 0.98  | 7.56E-233 | Stro |
| MBNL1     | 2.23E-236 | 0.309252 | 0.344 | 0.106 | 4.06E-232 | Stro |
| C6orf62   | 3.98E-236 | 0.319012 | 0.35  | 0.111 | 7.25E-232 | Stro |
| PRDX4     | 3.33E-235 | 0.44104  | 0.668 | 0.414 | 6.06E-231 | Stro |
| CCNG2     | 9.82E-232 | 0.28952  | 0.311 | 0.088 | 1.79E-227 | Stro |
| CD81      | 2.26E-230 | 0.389915 | 0.459 | 0.189 | 4.12E-226 | Stro |
| TACC1     | 1.92E-226 | 0.354343 | 0.449 | 0.182 | 3.49E-222 | Stro |
| SERPINH1  | 2.00E-222 | 0.327601 | 0.393 | 0.142 | 3.63E-218 | Stro |
| LEPROT    | 5.09E-222 | 0.443099 | 0.701 | 0.471 | 9.27E-218 | Stro |
| HSPA8     | 5.87E-222 | 0.414543 | 0.916 | 0.77  | 1.07E-217 | Stro |
| NRP2      | 2.28E-221 | 0.307043 | 0.325 | 0.1   | 4.15E-217 | Stro |
| RPS27L    | 2.56E-220 | 0.432082 | 0.936 | 0.829 | 4.67E-216 | Stro |
| NDUFA4L2  | 2.91E-217 | 0.538991 | 0.869 | 0.617 | 5.30E-213 | Stro |
| NGFRAP1   | 4.49E-216 | 0.465046 | 0.886 | 0.742 | 8.17E-212 | Stro |
| GFPT1     | 1.31E-213 | 0.281104 | 0.33  | 0.105 | 2.38E-209 | Stro |
| SLITRK6   | 2.00E-213 | 0.267816 | 0.252 | 0.062 | 3.64E-209 | Stro |
| TMEM43    | 2.01E-213 | 0.376346 | 0.553 | 0.283 | 3.65E-209 | Stro |
| RUNX1     | 1.06E-212 | 0.299833 | 0.322 | 0.101 | 1.93E-208 | Stro |
| CHCHD10   | 3.90E-212 | 0.317951 | 0.549 | 0.237 | 7.11E-208 | Stro |
| PKIG      | 8.82E-212 | 0.311158 | 0.381 | 0.14  | 1.61E-207 | Stro |
| PIGK      | 1.25E-211 | 0.331041 | 0.415 | 0.166 | 2.28E-207 | Stro |
| TXNDC15   | 2.10E-211 | 0.36969  | 0.541 | 0.278 | 3.82E-207 | Stro |
| PELI1     | 3.00E-211 | 0.359724 | 0.456 | 0.188 | 5.46E-207 | Stro |
| TMEM50B   | 8.90E-210 | 0.410425 | 0.659 | 0.411 | 1.62E-205 | Stro |
| SLC16A3   | 4.20E-209 | 0.306379 | 0.335 | 0.109 | 7.64E-205 | Stro |
| OSTC      | 2.77E-208 | 0.420136 | 0.791 | 0.609 | 5.04E-204 | Stro |
| ARL2      | 3.63E-206 | 0.405184 | 0.666 | 0.427 | 6.60E-202 | Stro |
| EXTL2     | 4.49E-206 | 0.252852 | 0.299 | 0.089 | 8.18E-202 | Stro |
| SNHG5     | 2.18E-204 | 0.391811 | 0.975 | 0.908 | 3.96E-200 | Stro |
| SSR1      | 3.52E-203 | 0.38847  | 0.619 | 0.369 | 6.40E-199 | Stro |
| SSR3      | 5.05E-203 | 0.410816 | 0.69  | 0.464 | 9.19E-199 | Stro |
| LOC654342 | 2.72E-201 | 0.354617 | 0.437 | 0.189 | 4.95E-197 | Stro |
| CTNNB1    | 2.48E-199 | 0.508084 | 0.428 | 0.182 | 4.51E-195 | Stro |
| AKIRIN2   | 1.21E-198 | 0.421849 | 0.722 | 0.511 | 2.20E-194 | Stro |
| MORF4L2   | 1.60E-195 | 0.395898 | 0.896 | 0.797 | 2.92E-191 | Stro |
| SRM       | 5.53E-194 | 0.327983 | 0.368 | 0.14  | 1.01E-189 | Stro |
| MRC2      | 2.64E-192 | 0.279016 | 0.311 | 0.101 | 4.81E-188 | Stro |
| LMAN1     | 1.37E-190 | 0.386705 | 0.615 | 0.367 | 2.50E-186 | Stro |

|          |           |          |       |       |           |      |
|----------|-----------|----------|-------|-------|-----------|------|
| CD40     | 1.40E-190 | 0.259426 | 0.299 | 0.094 | 2.54E-186 | Stro |
| C6orf48  | 4.44E-190 | 0.429885 | 0.802 | 0.624 | 8.08E-186 | Stro |
| AK1      | 8.82E-190 | 0.352478 | 0.511 | 0.262 | 1.61E-185 | Stro |
| PRKAR1A  | 2.10E-189 | 0.39043  | 0.677 | 0.438 | 3.83E-185 | Stro |
| FAM63B   | 8.25E-189 | 0.33469  | 0.508 | 0.253 | 1.50E-184 | Stro |
| HERPUD1  | 1.06E-187 | 0.397786 | 0.972 | 0.937 | 1.93E-183 | Stro |
| C5orf38  | 7.85E-187 | 0.27485  | 0.335 | 0.118 | 1.43E-182 | Stro |
| NFIC     | 9.31E-186 | 0.374597 | 0.614 | 0.365 | 1.70E-181 | Stro |
| MCFD2    | 6.08E-185 | 0.328515 | 0.416 | 0.183 | 1.11E-180 | Stro |
| EHD1     | 6.96E-185 | 0.381212 | 0.425 | 0.191 | 1.27E-180 | Stro |
| SORBS3   | 9.79E-185 | 0.299575 | 0.408 | 0.173 | 1.78E-180 | Stro |
| MLEC     | 1.87E-184 | 0.33238  | 0.462 | 0.221 | 3.41E-180 | Stro |
| SLC39A1  | 4.62E-184 | 0.392178 | 0.713 | 0.513 | 8.42E-180 | Stro |
| STRAP    | 1.73E-183 | 0.38347  | 0.739 | 0.535 | 3.16E-179 | Stro |
| GADD45G  | 3.09E-182 | 0.533804 | 0.621 | 0.374 | 5.63E-178 | Stro |
| SNHG8    | 5.34E-182 | 0.366298 | 0.844 | 0.675 | 9.73E-178 | Stro |
| NFIB     | 7.33E-182 | 0.293799 | 0.355 | 0.133 | 1.33E-177 | Stro |
| ARL5A    | 8.30E-182 | 0.38879  | 0.696 | 0.49  | 1.51E-177 | Stro |
| GPAA1    | 1.01E-180 | 0.353421 | 0.525 | 0.284 | 1.83E-176 | Stro |
| CSDE1    | 4.79E-180 | 0.377175 | 0.871 | 0.722 | 8.72E-176 | Stro |
| TMEM30A  | 1.14E-178 | 0.284049 | 0.366 | 0.143 | 2.08E-174 | Stro |
| ALKBH5   | 1.33E-178 | 0.361097 | 0.529 | 0.285 | 2.42E-174 | Stro |
| TMED10   | 9.24E-178 | 0.350366 | 0.901 | 0.801 | 1.68E-173 | Stro |
| FHL2     | 9.82E-176 | 0.356903 | 0.592 | 0.328 | 1.79E-171 | Stro |
| SEC61A1  | 2.55E-174 | 0.311183 | 0.425 | 0.196 | 4.65E-170 | Stro |
| LGMN     | 2.60E-174 | 0.330595 | 0.48  | 0.241 | 4.73E-170 | Stro |
| UBE2J1   | 1.03E-172 | 0.356601 | 0.475 | 0.243 | 1.88E-168 | Stro |
| DDX3X    | 8.75E-172 | 0.443024 | 0.767 | 0.598 | 1.59E-167 | Stro |
| STOM     | 1.29E-170 | 0.364989 | 0.585 | 0.349 | 2.34E-166 | Stro |
| SLC25A33 | 1.41E-170 | 0.366065 | 0.472 | 0.243 | 2.56E-166 | Stro |
| USP22    | 1.83E-169 | 0.258963 | 0.298 | 0.103 | 3.33E-165 | Stro |
| CMPK1    | 8.90E-167 | 0.363833 | 0.74  | 0.529 | 1.62E-162 | Stro |
| CAPZA2   | 3.64E-165 | 0.368997 | 0.77  | 0.595 | 6.63E-161 | Stro |
| NFIA     | 1.22E-164 | 0.340038 | 0.49  | 0.257 | 2.23E-160 | Stro |
| GNAI1    | 3.57E-163 | 0.352569 | 0.528 | 0.3   | 6.50E-159 | Stro |
| PNRC1    | 4.74E-163 | 0.384695 | 0.929 | 0.857 | 8.62E-159 | Stro |
| PPFIBP1  | 5.11E-163 | 0.34395  | 0.54  | 0.305 | 9.31E-159 | Stro |
| IDS      | 5.79E-163 | 0.349577 | 0.595 | 0.367 | 1.05E-158 | Stro |
| PTTG1IP  | 2.23E-162 | 0.362509 | 0.738 | 0.56  | 4.06E-158 | Stro |
| SDF4     | 2.99E-162 | 0.366969 | 0.648 | 0.443 | 5.44E-158 | Stro |
| S100A10  | 4.96E-162 | 0.278035 | 0.999 | 0.942 | 9.03E-158 | Stro |
| MAGED1   | 5.11E-162 | 0.294493 | 0.398 | 0.179 | 9.31E-158 | Stro |
| DAD1     | 7.26E-162 | 0.318736 | 0.905 | 0.827 | 1.32E-157 | Stro |
| NTAN1    | 3.26E-161 | 0.296683 | 0.439 | 0.215 | 5.94E-157 | Stro |
| SPG20    | 6.53E-161 | 0.326026 | 0.442 | 0.22  | 1.19E-156 | Stro |
| TMEM120A | 7.56E-161 | 0.295503 | 0.424 | 0.203 | 1.38E-156 | Stro |
| TMX4     | 8.91E-161 | 0.30002  | 0.425 | 0.199 | 1.62E-156 | Stro |
| PCNP     | 4.05E-159 | 0.360483 | 0.815 | 0.66  | 7.38E-155 | Stro |

|          |           |          |       |       |           |      |
|----------|-----------|----------|-------|-------|-----------|------|
| EGR1     | 4.83E-159 | 0.45916  | 0.94  | 0.853 | 8.80E-155 | Stro |
| SPTBN1   | 5.31E-158 | 0.280605 | 0.382 | 0.166 | 9.66E-154 | Stro |
| PSIP1    | 5.76E-158 | 0.304257 | 0.456 | 0.227 | 1.05E-153 | Stro |
| JMJD6    | 8.79E-157 | 0.347219 | 0.488 | 0.262 | 1.60E-152 | Stro |
| DEGS1    | 1.65E-155 | 0.267099 | 0.613 | 0.338 | 3.00E-151 | Stro |
| CCNL1    | 6.97E-155 | 0.382353 | 0.901 | 0.789 | 1.27E-150 | Stro |
| CASC4    | 1.11E-154 | 0.26922  | 0.346 | 0.144 | 2.02E-150 | Stro |
| MAP1LC3A | 2.01E-153 | 0.274492 | 0.381 | 0.169 | 3.66E-149 | Stro |
| ATP6AP2  | 2.30E-152 | 0.354038 | 0.852 | 0.749 | 4.19E-148 | Stro |
| C12orf57 | 1.51E-151 | 0.349112 | 0.839 | 0.725 | 2.74E-147 | Stro |
| CCDC85B  | 2.00E-151 | 0.360704 | 0.723 | 0.52  | 3.63E-147 | Stro |
| SMPD1    | 5.18E-151 | 0.268952 | 0.335 | 0.139 | 9.43E-147 | Stro |
| C16orf80 | 1.95E-149 | 0.382777 | 0.588 | 0.384 | 3.56E-145 | Stro |
| LAMP1    | 4.57E-149 | 0.310732 | 0.892 | 0.801 | 8.32E-145 | Stro |
| NFKBIZ   | 6.67E-149 | 0.411212 | 0.53  | 0.31  | 1.21E-144 | Stro |
| LMNA     | 6.83E-149 | 0.354653 | 0.978 | 0.965 | 1.24E-144 | Stro |
| KLF6     | 7.00E-149 | 0.310102 | 0.812 | 0.652 | 1.27E-144 | Stro |
| RCN1     | 1.04E-148 | 0.350781 | 0.584 | 0.377 | 1.90E-144 | Stro |
| PBXIP1   | 1.07E-148 | 0.264897 | 0.375 | 0.165 | 1.95E-144 | Stro |
| NTRK2    | 6.86E-148 | 0.25327  | 0.538 | 0.26  | 1.25E-143 | Stro |
| SELK     | 4.69E-146 | 0.264826 | 0.938 | 0.847 | 8.54E-142 | Stro |
| SSPN     | 3.63E-145 | 0.295615 | 0.39  | 0.183 | 6.62E-141 | Stro |
| PDIA6    | 4.67E-144 | 0.329599 | 0.849 | 0.752 | 8.51E-140 | Stro |
| UGDH     | 1.11E-143 | 0.256742 | 0.346 | 0.149 | 2.02E-139 | Stro |
| PDLIM5   | 1.67E-143 | 0.275397 | 0.488 | 0.259 | 3.04E-139 | Stro |
| BOC      | 3.01E-143 | 0.266406 | 0.36  | 0.158 | 5.49E-139 | Stro |
| GADD45A  | 4.05E-143 | 0.429829 | 0.748 | 0.575 | 7.37E-139 | Stro |
| CSRNP1   | 4.60E-143 | 0.369008 | 0.599 | 0.384 | 8.37E-139 | Stro |
| EIF5B    | 3.37E-142 | 0.337736 | 0.766 | 0.613 | 6.15E-138 | Stro |
| TSPAN6   | 1.12E-141 | 0.290582 | 0.475 | 0.261 | 2.05E-137 | Stro |
| DHRS7    | 3.59E-141 | 0.320905 | 0.599 | 0.396 | 6.54E-137 | Stro |
| CEBPB    | 5.71E-140 | 0.301528 | 0.802 | 0.62  | 1.04E-135 | Stro |
| GUSB     | 1.03E-138 | 0.307173 | 0.469 | 0.258 | 1.87E-134 | Stro |
| TXLNG    | 8.01E-138 | 0.260206 | 0.298 | 0.119 | 1.46E-133 | Stro |
| PRAF2    | 1.21E-137 | 0.262467 | 0.359 | 0.163 | 2.21E-133 | Stro |
| MLF1     | 3.36E-137 | 0.351978 | 0.474 | 0.261 | 6.12E-133 | Stro |
| COPRS    | 9.27E-137 | 0.274965 | 0.395 | 0.196 | 1.69E-132 | Stro |
| HEXIM1   | 6.83E-135 | 0.337736 | 0.585 | 0.376 | 1.24E-130 | Stro |
| TMED7    | 1.02E-134 | 0.274432 | 0.379 | 0.183 | 1.85E-130 | Stro |
| ARL6IP5  | 1.87E-134 | 0.299019 | 0.883 | 0.776 | 3.40E-130 | Stro |
| TCTN3    | 9.43E-134 | 0.261707 | 0.419 | 0.212 | 1.72E-129 | Stro |
| IFRD1    | 4.27E-133 | 0.350074 | 0.587 | 0.38  | 7.78E-129 | Stro |
| PQLC3    | 4.47E-133 | 0.2882   | 0.465 | 0.255 | 8.13E-129 | Stro |
| PGM1     | 6.28E-133 | 0.275404 | 0.434 | 0.231 | 1.14E-128 | Stro |
| KCTD10   | 1.09E-131 | 0.263425 | 0.394 | 0.196 | 1.98E-127 | Stro |
| NTF3     | 1.99E-129 | 0.290755 | 0.4   | 0.196 | 3.62E-125 | Stro |
| NAP1L1   | 9.63E-129 | 0.273782 | 0.843 | 0.716 | 1.75E-124 | Stro |
| TGOLN2   | 2.07E-128 | 0.283029 | 0.452 | 0.25  | 3.77E-124 | Stro |



|          |           |          |       |       |           |      |
|----------|-----------|----------|-------|-------|-----------|------|
| UNC50    | 2.10E-128 | 0.300772 | 0.594 | 0.397 | 3.81E-124 | Stro |
| RABAC1   | 4.72E-128 | 0.311839 | 0.843 | 0.741 | 8.59E-124 | Stro |
| MYADM    | 2.28E-127 | 0.297366 | 0.448 | 0.238 | 4.14E-123 | Stro |
| MED10    | 3.51E-127 | 0.31843  | 0.701 | 0.538 | 6.40E-123 | Stro |
| DLST     | 4.90E-127 | 0.255518 | 0.383 | 0.189 | 8.92E-123 | Stro |
| SERINC3  | 1.12E-125 | 0.280628 | 0.502 | 0.3   | 2.05E-121 | Stro |
| SEPT2    | 8.33E-125 | 0.319288 | 0.656 | 0.477 | 1.52E-120 | Stro |
| CMSS1    | 3.45E-123 | 0.257273 | 0.38  | 0.187 | 6.28E-119 | Stro |
| ITFG1    | 3.96E-122 | 0.288036 | 0.513 | 0.317 | 7.21E-118 | Stro |
| TMEM248  | 1.74E-121 | 0.297447 | 0.536 | 0.347 | 3.17E-117 | Stro |
| SON      | 2.07E-121 | 0.313979 | 0.801 | 0.67  | 3.77E-117 | Stro |
| EPHX1    | 4.92E-121 | 0.301984 | 0.656 | 0.466 | 8.97E-117 | Stro |
| SURF4    | 1.57E-120 | 0.307215 | 0.581 | 0.397 | 2.86E-116 | Stro |
| RABGEF1  | 1.40E-119 | 0.268175 | 0.349 | 0.168 | 2.56E-115 | Stro |
| PITPNB   | 1.94E-118 | 0.292712 | 0.509 | 0.312 | 3.54E-114 | Stro |
| KLF4     | 4.99E-118 | 0.347819 | 0.952 | 0.911 | 9.09E-114 | Stro |
| PELO     | 1.49E-117 | 0.302712 | 0.441 | 0.255 | 2.71E-113 | Stro |
| TMEM109  | 6.25E-117 | 0.292351 | 0.672 | 0.5   | 1.14E-112 | Stro |
| FBXO21   | 1.84E-116 | 0.250075 | 0.394 | 0.202 | 3.35E-112 | Stro |
| EIF4B    | 1.55E-115 | 0.304598 | 0.64  | 0.465 | 2.82E-111 | Stro |
| C1orf122 | 7.24E-114 | 0.282736 | 0.499 | 0.311 | 1.32E-109 | Stro |
| PTP4A2   | 8.26E-114 | 0.288045 | 0.556 | 0.364 | 1.50E-109 | Stro |
| PHACTR2  | 1.14E-113 | 0.278272 | 0.428 | 0.239 | 2.07E-109 | Stro |
| RSL24D1  | 1.10E-111 | 0.295983 | 0.775 | 0.649 | 2.00E-107 | Stro |
| DKK3     | 4.79E-110 | 0.284714 | 0.843 | 0.612 | 8.71E-106 | Stro |
| TPBG     | 1.63E-109 | 0.289715 | 0.52  | 0.334 | 2.96E-105 | Stro |
| VAMP2    | 2.38E-109 | 0.26991  | 0.838 | 0.736 | 4.34E-105 | Stro |
| MTDH     | 1.84E-108 | 0.308217 | 0.705 | 0.551 | 3.34E-104 | Stro |
| KLC1     | 2.22E-108 | 0.277164 | 0.503 | 0.325 | 4.04E-104 | Stro |
| S100A13  | 3.01E-108 | 0.289133 | 0.748 | 0.592 | 5.49E-104 | Stro |
| ACAT1    | 2.39E-107 | 0.271922 | 0.481 | 0.295 | 4.35E-103 | Stro |
| CTSB     | 3.74E-107 | 0.323149 | 0.837 | 0.772 | 6.82E-103 | Stro |
| BSG      | 7.04E-107 | 0.279367 | 0.908 | 0.839 | 1.28E-102 | Stro |
| SVIP     | 7.16E-107 | 0.279466 | 0.497 | 0.305 | 1.30E-102 | Stro |
| H1FO     | 3.29E-104 | 0.291388 | 0.477 | 0.285 | 5.99E-100 | Stro |
| WSB1     | 4.97E-104 | 0.286614 | 0.735 | 0.584 | 9.06E-100 | Stro |
| SPG21    | 8.53E-103 | 0.266857 | 0.547 | 0.364 | 1.55E-98  | Stro |
| KDELR2   | 2.11E-102 | 0.290565 | 0.754 | 0.644 | 3.85E-98  | Stro |
| MCL1     | 3.15E-102 | 0.285911 | 0.806 | 0.68  | 5.74E-98  | Stro |
| BRD2     | 4.59E-101 | 0.302826 | 0.716 | 0.575 | 8.35E-97  | Stro |
| KIF5B    | 1.47E-100 | 0.2712   | 0.8   | 0.694 | 2.68E-96  | Stro |
| SERINC1  | 2.23E-100 | 0.260153 | 0.673 | 0.506 | 4.06E-96  | Stro |
| SLC39A7  | 3.78E-100 | 0.250291 | 0.414 | 0.24  | 6.88E-96  | Stro |
| EIF1B    | 7.72E-100 | 0.295962 | 0.789 | 0.7   | 1.41E-95  | Stro |
| ESD      | 1.18E-99  | 0.270196 | 0.671 | 0.51  | 2.14E-95  | Stro |
| SLC44A2  | 1.02E-98  | 0.262682 | 0.484 | 0.309 | 1.86E-94  | Stro |
| NXF1     | 1.07E-98  | 0.298406 | 0.386 | 0.218 | 1.96E-94  | Stro |
| MGME1    | 2.80E-96  | 0.264461 | 0.464 | 0.293 | 5.09E-92  | Stro |

|            |          |          |       |       |          |        |
|------------|----------|----------|-------|-------|----------|--------|
| MPHOSPH8   | 4.21E-93 | 0.264897 | 0.617 | 0.459 | 7.66E-89 | Stro   |
| RBM7       | 4.40E-93 | 0.264089 | 0.447 | 0.279 | 8.01E-89 | Stro   |
| ADI1       | 2.54E-90 | 0.269704 | 0.852 | 0.771 | 4.63E-86 | Stro   |
| RPN2       | 3.06E-90 | 0.259653 | 0.821 | 0.734 | 5.58E-86 | Stro   |
| EIF4G2     | 4.12E-89 | 0.251349 | 0.878 | 0.789 | 7.50E-85 | Stro   |
| BZW1       | 7.00E-89 | 0.273019 | 0.815 | 0.699 | 1.28E-84 | Stro   |
| VIMP       | 4.79E-87 | 0.272915 | 0.839 | 0.768 | 8.72E-83 | Stro   |
| CCDC47     | 5.06E-87 | 0.263985 | 0.669 | 0.529 | 9.22E-83 | Stro   |
| RASD1      | 1.20E-84 | 0.270354 | 0.598 | 0.415 | 2.19E-80 | Stro   |
| MATR3      | 4.39E-83 | 0.25349  | 0.652 | 0.512 | 7.99E-79 | Stro   |
| CNOT2      | 1.61E-82 | 0.26911  | 0.448 | 0.298 | 2.93E-78 | Stro   |
| INSIG1     | 5.63E-82 | 0.265873 | 0.36  | 0.204 | 1.02E-77 | Stro   |
| SDF2L1     | 6.20E-82 | 0.262    | 0.533 | 0.374 | 1.13E-77 | Stro   |
| DDX24      | 1.92E-81 | 0.265404 | 0.746 | 0.641 | 3.49E-77 | Stro   |
| ARID5B     | 9.64E-81 | 0.38467  | 0.543 | 0.41  | 1.76E-76 | Stro   |
| SCPEP1     | 1.32E-80 | 0.25534  | 0.578 | 0.431 | 2.40E-76 | Stro   |
| MAP1LC3B   | 5.58E-79 | 0.293258 | 0.862 | 0.806 | 1.02E-74 | Stro   |
| MAT2A      | 2.24E-78 | 0.265048 | 0.355 | 0.205 | 4.08E-74 | Stro   |
| IRF2BPL    | 6.51E-73 | 0.258705 | 0.432 | 0.287 | 1.19E-68 | Stro   |
| DNTTIP2    | 3.45E-69 | 0.260622 | 0.594 | 0.467 | 6.29E-65 | Stro   |
| GRPEL1     | 2.90E-67 | 0.282682 | 0.63  | 0.527 | 5.28E-63 | Stro   |
| OSER1      | 7.90E-59 | 0.259919 | 0.6   | 0.486 | 1.44E-54 | Stro   |
| KRT13      | 0        | 1.961534 | 0.998 | 0.604 | 0        | Conj-1 |
| KRT4       | 0        | 1.609484 | 0.759 | 0.121 | 0        | Conj-1 |
| SLPI       | 0        | 1.396151 | 0.998 | 0.384 | 0        | Conj-1 |
| AQP5       | 0        | 1.368298 | 0.756 | 0.13  | 0        | Conj-1 |
| AQP3       | 0        | 1.295185 | 0.997 | 0.621 | 0        | Conj-1 |
| HIST2H2AA4 | 0        | 1.290604 | 0.97  | 0.683 | 0        | Conj-1 |
| OSR2       | 0        | 1.240673 | 0.89  | 0.17  | 0        | Conj-1 |
| CXCL17     | 0        | 1.207503 | 0.921 | 0.331 | 0        | Conj-1 |
| S100A9     | 0        | 1.193149 | 0.786 | 0.347 | 0        | Conj-1 |
| IGFBP3     | 0        | 1.018637 | 0.642 | 0.147 | 0        | Conj-1 |
| ELF3       | 0        | 0.990826 | 0.997 | 0.784 | 0        | Conj-1 |
| F3         | 0        | 0.978395 | 0.741 | 0.178 | 0        | Conj-1 |
| S100A11    | 0        | 0.972731 | 1     | 0.984 | 0        | Conj-1 |
| KRT8       | 0        | 0.969159 | 0.829 | 0.336 | 0        | Conj-1 |
| HOPX       | 0        | 0.947441 | 0.971 | 0.504 | 0        | Conj-1 |
| CFD        | 0        | 0.936228 | 0.813 | 0.296 | 0        | Conj-1 |
| HIST1H2AC  | 0        | 0.891263 | 0.617 | 0.123 | 0        | Conj-1 |
| LSP1       | 0        | 0.888146 | 0.822 | 0.259 | 0        | Conj-1 |
| DDIT4      | 0        | 0.882586 | 0.855 | 0.408 | 0        | Conj-1 |
| FAM213A    | 0        | 0.85451  | 0.862 | 0.271 | 0        | Conj-1 |
| NUPR1      | 0        | 0.826364 | 0.975 | 0.649 | 0        | Conj-1 |
| RHOV       | 0        | 0.800939 | 0.98  | 0.594 | 0        | Conj-1 |
| SYT8       | 0        | 0.782984 | 0.987 | 0.728 | 0        | Conj-1 |
| FMO1       | 0        | 0.780868 | 0.598 | 0.12  | 0        | Conj-1 |
| LCN2       | 0        | 0.752909 | 0.65  | 0.161 | 0        | Conj-1 |
| ZFP36L1    | 0        | 0.751756 | 0.978 | 0.829 | 0        | Conj-1 |

|           |   |          |       |       |   |        |
|-----------|---|----------|-------|-------|---|--------|
| PHLDA2    | 0 | 0.749422 | 0.998 | 0.891 | 0 | Conj-1 |
| HIST1H2BC | 0 | 0.739327 | 0.492 | 0.088 | 0 | Conj-1 |
| MDK       | 0 | 0.696436 | 0.737 | 0.22  | 0 | Conj-1 |
| CLEC2B    | 0 | 0.691921 | 0.935 | 0.6   | 0 | Conj-1 |
| LMO4      | 0 | 0.688849 | 0.872 | 0.534 | 0 | Conj-1 |
| C9orf16   | 0 | 0.688617 | 0.977 | 0.843 | 0 | Conj-1 |
| KLF5      | 0 | 0.684676 | 0.962 | 0.647 | 0 | Conj-1 |
| TNNI2     | 0 | 0.675073 | 0.682 | 0.212 | 0 | Conj-1 |
| B2M       | 0 | 0.669085 | 1     | 0.997 | 0 | Conj-1 |
| HIST2H2BE | 0 | 0.667654 | 0.655 | 0.202 | 0 | Conj-1 |
| ID1       | 0 | 0.654483 | 0.996 | 0.954 | 0 | Conj-1 |
| BTG1      | 0 | 0.652022 | 0.993 | 0.947 | 0 | Conj-1 |
| CAPNS2    | 0 | 0.647519 | 0.874 | 0.551 | 0 | Conj-1 |
| FAM3B     | 0 | 0.646291 | 0.613 | 0.111 | 0 | Conj-1 |
| SERTAD1   | 0 | 0.644603 | 0.856 | 0.562 | 0 | Conj-1 |
| HSPB1     | 0 | 0.613099 | 1     | 0.983 | 0 | Conj-1 |
| S100A16   | 0 | 0.60601  | 0.953 | 0.689 | 0 | Conj-1 |
| RARRES3   | 0 | 0.595588 | 0.758 | 0.365 | 0 | Conj-1 |
| CSTA      | 0 | 0.594707 | 0.982 | 0.732 | 0 | Conj-1 |
| A4GALT    | 0 | 0.593256 | 0.839 | 0.486 | 0 | Conj-1 |
| POLR2J2   | 0 | 0.586182 | 1     | 0.865 | 0 | Conj-1 |
| HIST1H2BD | 0 | 0.571612 | 0.508 | 0.111 | 0 | Conj-1 |
| CHCHD10   | 0 | 0.570555 | 0.682 | 0.228 | 0 | Conj-1 |
| CD74      | 0 | 0.563339 | 0.805 | 0.373 | 0 | Conj-1 |
| BAALC     | 0 | 0.555794 | 0.487 | 0.08  | 0 | Conj-1 |
| BAG1      | 0 | 0.549953 | 0.985 | 0.894 | 0 | Conj-1 |
| TNNT3     | 0 | 0.546974 | 0.806 | 0.405 | 0 | Conj-1 |
| HES4      | 0 | 0.544704 | 0.772 | 0.347 | 0 | Conj-1 |
| BARX2     | 0 | 0.542924 | 0.535 | 0.073 | 0 | Conj-1 |
| CP        | 0 | 0.542859 | 0.503 | 0.049 | 0 | Conj-1 |
| DEFB1     | 0 | 0.537387 | 0.77  | 0.35  | 0 | Conj-1 |
| RERG      | 0 | 0.517091 | 0.594 | 0.146 | 0 | Conj-1 |
| KLK11     | 0 | 0.513991 | 0.706 | 0.305 | 0 | Conj-1 |
| ABRACL    | 0 | 0.511724 | 0.748 | 0.359 | 0 | Conj-1 |
| HIST1H2BK | 0 | 0.476313 | 0.52  | 0.136 | 0 | Conj-1 |
| HIST1H2AE | 0 | 0.475341 | 0.418 | 0.091 | 0 | Conj-1 |
| HIST1H2BG | 0 | 0.471135 | 0.401 | 0.063 | 0 | Conj-1 |
| RPS29     | 0 | 0.450481 | 0.998 | 0.996 | 0 | Conj-1 |
| ZNF296    | 0 | 0.44936  | 0.487 | 0.123 | 0 | Conj-1 |
| RPS6      | 0 | 0.437619 | 0.999 | 0.999 | 0 | Conj-1 |
| CTSS      | 0 | 0.423727 | 0.573 | 0.189 | 0 | Conj-1 |
| RPL10     | 0 | 0.420168 | 1     | 1     | 0 | Conj-1 |
| RPLP1     | 0 | 0.418952 | 1     | 1     | 0 | Conj-1 |
| RPS15A    | 0 | 0.417398 | 0.999 | 0.996 | 0 | Conj-1 |
| PRSS22    | 0 | 0.403029 | 0.473 | 0.133 | 0 | Conj-1 |
| RPS28     | 0 | 0.391504 | 1     | 0.999 | 0 | Conj-1 |
| RPL18A    | 0 | 0.388289 | 0.999 | 0.997 | 0 | Conj-1 |
| RPL29     | 0 | 0.387061 | 0.997 | 0.992 | 0 | Conj-1 |

|          |           |          |       |       |           |        |
|----------|-----------|----------|-------|-------|-----------|--------|
| IFT172   | 0         | 0.386226 | 0.423 | 0.082 | 0         | Conj-1 |
| RPL13    | 0         | 0.384935 | 1     | 0.999 | 0         | Conj-1 |
| RHCG     | 0         | 0.383754 | 0.323 | 0.054 | 0         | Conj-1 |
| RPS27    | 0         | 0.380355 | 1     | 1     | 0         | Conj-1 |
| RPL41    | 0         | 0.372537 | 1     | 1     | 0         | Conj-1 |
| RPS18    | 0         | 0.370506 | 1     | 1     | 0         | Conj-1 |
| RPL27A   | 0         | 0.359315 | 1     | 0.998 | 0         | Conj-1 |
| RPL12    | 0         | 0.351972 | 0.999 | 0.998 | 0         | Conj-1 |
| RPL10A   | 0         | 0.351785 | 0.998 | 0.994 | 0         | Conj-1 |
| MX1      | 0         | 0.349703 | 0.4   | 0.092 | 0         | Conj-1 |
| RPS14    | 0         | 0.34951  | 1     | 1     | 0         | Conj-1 |
| RPL23A   | 0         | 0.338191 | 0.999 | 0.999 | 0         | Conj-1 |
| RPL13A   | 0         | 0.335813 | 1     | 0.999 | 0         | Conj-1 |
| RPL21    | 0         | 0.334296 | 0.999 | 0.999 | 0         | Conj-1 |
| PPP1R1B  | 0         | 0.329836 | 0.33  | 0.04  | 0         | Conj-1 |
| RPL34    | 0         | 0.325606 | 1     | 1     | 0         | Conj-1 |
| LRG1     | 0         | 0.322319 | 0.319 | 0.03  | 0         | Conj-1 |
| CYP4B1   | 0         | 0.295533 | 0.307 | 0.043 | 0         | Conj-1 |
| SOX7     | 0         | 0.29307  | 0.331 | 0.062 | 0         | Conj-1 |
| RPS13    | 0         | 0.291561 | 0.997 | 0.998 | 0         | Conj-1 |
| TF       | 0         | 0.272037 | 0.328 | 0.062 | 0         | Conj-1 |
| HLA-DRA  | 0         | 0.255964 | 0.545 | 0.163 | 0         | Conj-1 |
| DNAJB1   | 1.78E-307 | 0.500605 | 0.987 | 0.902 | 3.25E-303 | Conj-1 |
| DUSP2    | 1.98E-307 | 0.537872 | 0.473 | 0.138 | 3.60E-303 | Conj-1 |
| RPL32    | 5.79E-304 | 0.305581 | 0.998 | 0.999 | 1.05E-299 | Conj-1 |
| SLC9A3R1 | 2.19E-302 | 0.518386 | 0.807 | 0.457 | 3.99E-298 | Conj-1 |
| GBP2     | 1.17E-299 | 0.273384 | 0.308 | 0.058 | 2.13E-295 | Conj-1 |
| S100A8   | 2.59E-295 | 1.010454 | 0.695 | 0.379 | 4.72E-291 | Conj-1 |
| RPL8     | 9.18E-294 | 0.309989 | 0.999 | 0.998 | 1.67E-289 | Conj-1 |
| POLR2J3  | 6.59E-287 | 0.556196 | 0.999 | 0.856 | 1.20E-282 | Conj-1 |
| ZNF385A  | 1.07E-286 | 0.47119  | 0.768 | 0.411 | 1.94E-282 | Conj-1 |
| RPLP0    | 6.61E-285 | 0.44406  | 0.998 | 0.991 | 1.20E-280 | Conj-1 |
| RPS8     | 1.59E-280 | 0.33865  | 0.999 | 0.999 | 2.89E-276 | Conj-1 |
| HLA-B    | 1.82E-274 | 0.587566 | 0.983 | 0.917 | 3.32E-270 | Conj-1 |
| SOX15    | 3.59E-273 | 0.510353 | 0.957 | 0.754 | 6.54E-269 | Conj-1 |
| RPS19    | 1.33E-272 | 0.373249 | 0.999 | 0.998 | 2.42E-268 | Conj-1 |
| TACSTD2  | 2.31E-271 | 0.479957 | 1     | 0.888 | 4.20E-267 | Conj-1 |
| AX747171 | 6.26E-270 | 0.395679 | 0.469 | 0.152 | 1.14E-265 | Conj-1 |
| CLIC1    | 1.87E-269 | 0.424861 | 0.982 | 0.904 | 3.41E-265 | Conj-1 |
| SOCS1    | 2.53E-269 | 0.41499  | 0.431 | 0.131 | 4.60E-265 | Conj-1 |
| RPS9     | 7.30E-268 | 0.294271 | 0.999 | 0.998 | 1.33E-263 | Conj-1 |
| KRT7     | 1.96E-266 | 0.382467 | 0.289 | 0.057 | 3.58E-262 | Conj-1 |
| RPL28    | 1.98E-263 | 0.43228  | 0.999 | 0.991 | 3.60E-259 | Conj-1 |
| ARL4A    | 2.29E-259 | 0.561618 | 0.864 | 0.582 | 4.16E-255 | Conj-1 |
| TXNIP    | 1.84E-257 | 0.716335 | 0.882 | 0.647 | 3.35E-253 | Conj-1 |
| WFDC2    | 4.73E-257 | 0.341938 | 0.295 | 0.061 | 8.60E-253 | Conj-1 |
| PLK2     | 3.52E-251 | 0.535866 | 0.827 | 0.49  | 6.42E-247 | Conj-1 |
| CALML3   | 2.02E-250 | 0.575513 | 0.929 | 0.67  | 3.67E-246 | Conj-1 |

|          |           |          |       |       |           |        |
|----------|-----------|----------|-------|-------|-----------|--------|
| MARCKSL1 | 1.63E-249 | 0.483417 | 0.545 | 0.207 | 2.97E-245 | Conj-1 |
| NPL      | 8.23E-247 | 0.304635 | 0.392 | 0.115 | 1.50E-242 | Conj-1 |
| H2AFX    | 1.45E-243 | 0.390048 | 0.482 | 0.172 | 2.63E-239 | Conj-1 |
| MUC20    | 1.44E-239 | 0.419361 | 0.693 | 0.325 | 2.63E-235 | Conj-1 |
| TMEM40   | 3.04E-239 | 0.417191 | 0.639 | 0.297 | 5.53E-235 | Conj-1 |
| ZFP36    | 9.16E-239 | 0.466542 | 0.996 | 0.973 | 1.67E-234 | Conj-1 |
| RPL19    | 2.50E-238 | 0.27039  | 0.999 | 0.999 | 4.54E-234 | Conj-1 |
| FAM3D    | 2.87E-237 | 0.307008 | 0.489 | 0.162 | 5.23E-233 | Conj-1 |
| MAOA     | 4.52E-237 | 0.389226 | 0.534 | 0.212 | 8.23E-233 | Conj-1 |
| RPS27A   | 7.39E-236 | 0.268261 | 0.998 | 0.997 | 1.35E-231 | Conj-1 |
| KCNK6    | 7.99E-236 | 0.312292 | 0.427 | 0.137 | 1.46E-231 | Conj-1 |
| RPS4X    | 7.67E-235 | 0.305956 | 0.999 | 0.999 | 1.40E-230 | Conj-1 |
| CSRP2    | 1.35E-234 | 0.533625 | 0.993 | 0.866 | 2.46E-230 | Conj-1 |
| RPL35    | 6.51E-234 | 0.266226 | 0.999 | 0.999 | 1.18E-229 | Conj-1 |
| C1orf63  | 1.26E-233 | 0.508037 | 0.771 | 0.477 | 2.30E-229 | Conj-1 |
| TNFRSF21 | 2.00E-228 | 0.268342 | 0.293 | 0.068 | 3.64E-224 | Conj-1 |
| RPL14    | 3.49E-227 | 0.274107 | 0.998 | 0.995 | 6.36E-223 | Conj-1 |
| CLINT1   | 8.14E-227 | 0.431084 | 0.721 | 0.395 | 1.48E-222 | Conj-1 |
| ZC3H12A  | 8.53E-227 | 0.437002 | 0.552 | 0.229 | 1.55E-222 | Conj-1 |
| PABPC1   | 9.02E-225 | 0.449387 | 0.964 | 0.893 | 1.64E-220 | Conj-1 |
| RPS10    | 5.39E-224 | 0.350613 | 0.99  | 0.977 | 9.81E-220 | Conj-1 |
| FABP5    | 7.79E-222 | 0.554111 | 1     | 0.937 | 1.42E-217 | Conj-1 |
| RPL18    | 8.47E-222 | 0.291793 | 0.999 | 0.996 | 1.54E-217 | Conj-1 |
| RPL36    | 3.59E-219 | 0.266131 | 0.998 | 0.997 | 6.53E-215 | Conj-1 |
| RPL37A   | 1.51E-217 | 0.29375  | 0.998 | 0.998 | 2.75E-213 | Conj-1 |
| PPAP2C   | 2.18E-214 | 0.303419 | 0.414 | 0.137 | 3.96E-210 | Conj-1 |
| ADM      | 5.62E-214 | 0.495308 | 0.988 | 0.875 | 1.02E-209 | Conj-1 |
| S100A14  | 9.10E-214 | 0.438581 | 0.987 | 0.749 | 1.66E-209 | Conj-1 |
| CCDC80   | 1.30E-213 | 0.353027 | 0.345 | 0.098 | 2.37E-209 | Conj-1 |
| ZFAS1    | 1.43E-213 | 0.411209 | 0.956 | 0.854 | 2.60E-209 | Conj-1 |
| RPS17L   | 2.18E-213 | 0.289858 | 0.998 | 0.996 | 3.97E-209 | Conj-1 |
| EHF      | 3.13E-212 | 0.505369 | 0.627 | 0.294 | 5.70E-208 | Conj-1 |
| PTGR1    | 1.52E-211 | 0.543647 | 0.653 | 0.367 | 2.77E-207 | Conj-1 |
| BCAS1    | 7.03E-211 | 0.260958 | 0.313 | 0.082 | 1.28E-206 | Conj-1 |
| RPS3A    | 8.49E-211 | 0.254146 | 0.998 | 0.998 | 1.55E-206 | Conj-1 |
| RPS20    | 1.29E-210 | 0.274887 | 0.998 | 0.996 | 2.34E-206 | Conj-1 |
| GPNMB    | 6.06E-208 | 0.418689 | 0.846 | 0.51  | 1.10E-203 | Conj-1 |
| RPL5     | 1.74E-205 | 0.265554 | 0.998 | 0.992 | 3.17E-201 | Conj-1 |
| HES1     | 2.00E-205 | 0.657611 | 0.902 | 0.738 | 3.64E-201 | Conj-1 |
| CLDN4    | 2.61E-204 | 0.407709 | 0.941 | 0.576 | 4.75E-200 | Conj-1 |
| MGST2    | 6.68E-204 | 0.402324 | 0.926 | 0.701 | 1.22E-199 | Conj-1 |
| PMAIP1   | 8.37E-204 | 0.484525 | 0.936 | 0.672 | 1.52E-199 | Conj-1 |
| RPS24    | 1.06E-202 | 0.29465  | 1     | 0.998 | 1.93E-198 | Conj-1 |
| DDIT3    | 2.88E-202 | 0.529069 | 0.788 | 0.515 | 5.25E-198 | Conj-1 |
| FAM46B   | 7.93E-202 | 0.403008 | 0.647 | 0.326 | 1.44E-197 | Conj-1 |
| SERINC2  | 1.01E-201 | 0.44645  | 0.806 | 0.519 | 1.85E-197 | Conj-1 |
| RPL17    | 8.01E-201 | 0.306653 | 0.993 | 0.984 | 1.46E-196 | Conj-1 |
| C19orf33 | 3.10E-200 | 0.389404 | 0.996 | 0.833 | 5.65E-196 | Conj-1 |

|                |           |          |       |       |           |        |
|----------------|-----------|----------|-------|-------|-----------|--------|
| GADD45G        | 7.91E-199 | 0.475151 | 0.68  | 0.373 | 1.44E-194 | Conj-1 |
| SERPIN2        | 2.16E-198 | 0.748274 | 0.321 | 0.09  | 3.93E-194 | Conj-1 |
| UAP1           | 3.39E-197 | 0.395896 | 0.643 | 0.32  | 6.17E-193 | Conj-1 |
| GSTK1          | 3.11E-196 | 0.401174 | 0.834 | 0.604 | 5.66E-192 | Conj-1 |
| RASD1          | 1.56E-193 | 0.463174 | 0.718 | 0.404 | 2.85E-189 | Conj-1 |
| PITPNC1        | 3.94E-192 | 0.253894 | 0.394 | 0.134 | 7.18E-188 | Conj-1 |
| CDKN1A         | 1.49E-191 | 0.394186 | 0.911 | 0.661 | 2.71E-187 | Conj-1 |
| RPL36A         | 1.38E-188 | 0.303559 | 0.995 | 0.988 | 2.51E-184 | Conj-1 |
| ENSG0000021145 | 8.93E-187 | 0.552305 | 1     | 0.997 | 1.63E-182 | Conj-1 |
| NUAK2          | 1.96E-186 | 0.41152  | 0.711 | 0.377 | 3.58E-182 | Conj-1 |
| NRARP          | 1.15E-185 | 0.299074 | 0.416 | 0.151 | 2.09E-181 | Conj-1 |
| CALM1          | 2.13E-185 | 0.330073 | 0.982 | 0.957 | 3.88E-181 | Conj-1 |
| RPS14P3        | 1.38E-184 | 0.313826 | 0.985 | 0.958 | 2.52E-180 | Conj-1 |
| SFN            | 4.30E-183 | 0.429477 | 0.997 | 0.86  | 7.83E-179 | Conj-1 |
| BTG2           | 6.28E-182 | 0.463131 | 0.87  | 0.621 | 1.14E-177 | Conj-1 |
| MIDN           | 1.36E-181 | 0.429126 | 0.739 | 0.461 | 2.48E-177 | Conj-1 |
| CRNDE          | 7.22E-181 | 0.30464  | 0.66  | 0.311 | 1.31E-176 | Conj-1 |
| JUNB           | 1.27E-180 | 0.379864 | 0.998 | 0.995 | 2.31E-176 | Conj-1 |
| DEGS1          | 2.23E-179 | 0.40263  | 0.656 | 0.34  | 4.06E-175 | Conj-1 |
| RPS2           | 5.42E-179 | 0.271587 | 0.998 | 0.997 | 9.86E-175 | Conj-1 |
| BBC3           | 6.38E-179 | 0.285352 | 0.394 | 0.142 | 1.16E-174 | Conj-1 |
| SLC1A5         | 7.85E-179 | 0.391124 | 0.71  | 0.425 | 1.43E-174 | Conj-1 |
| ENSG0000021008 | 7.22E-178 | 0.403337 | 1     | 1     | 1.31E-173 | Conj-1 |
| PDLIM1         | 3.03E-176 | 0.386217 | 0.928 | 0.75  | 5.51E-172 | Conj-1 |
| RPLP2          | 4.74E-176 | 0.259865 | 0.999 | 0.999 | 8.63E-172 | Conj-1 |
| EEF1G          | 1.12E-175 | 0.267416 | 0.993 | 0.988 | 2.04E-171 | Conj-1 |
| GADD45B        | 2.81E-175 | 0.404461 | 0.981 | 0.92  | 5.11E-171 | Conj-1 |
| MYLIP          | 1.24E-174 | 0.380557 | 0.602 | 0.317 | 2.25E-170 | Conj-1 |
| CTAGE5         | 5.07E-174 | 0.277185 | 0.426 | 0.166 | 9.23E-170 | Conj-1 |
| COX7A1         | 7.08E-174 | 0.440603 | 0.761 | 0.444 | 1.29E-169 | Conj-1 |
| IRF1           | 4.01E-173 | 0.401164 | 0.633 | 0.341 | 7.30E-169 | Conj-1 |
| LINC00673      | 5.56E-170 | 0.271521 | 0.379 | 0.135 | 1.01E-165 | Conj-1 |
| ID3            | 7.92E-168 | 0.324222 | 0.923 | 0.737 | 1.44E-163 | Conj-1 |
| H2AFJ          | 3.63E-167 | 0.376015 | 0.785 | 0.521 | 6.61E-163 | Conj-1 |
| HLA-C          | 4.68E-165 | 0.359684 | 0.983 | 0.952 | 8.52E-161 | Conj-1 |
| ENSG0000019876 | 9.12E-165 | 0.419668 | 0.999 | 0.981 | 1.66E-160 | Conj-1 |
| HBEGF          | 3.28E-162 | 0.328833 | 0.576 | 0.28  | 5.98E-158 | Conj-1 |
| NDRG2          | 6.55E-162 | 0.334061 | 0.615 | 0.321 | 1.19E-157 | Conj-1 |
| KRT17          | 1.19E-161 | 0.780389 | 0.673 | 0.386 | 2.16E-157 | Conj-1 |
| PITX1          | 2.40E-161 | 0.264175 | 0.291 | 0.088 | 4.36E-157 | Conj-1 |
| AREG           | 1.10E-159 | 0.477017 | 0.71  | 0.408 | 2.01E-155 | Conj-1 |
| EVA1A          | 1.34E-159 | 0.261742 | 0.418 | 0.167 | 2.44E-155 | Conj-1 |
| IL20RB         | 4.57E-159 | 0.378583 | 0.776 | 0.504 | 8.32E-155 | Conj-1 |
| RRAD           | 4.31E-158 | 0.305826 | 0.323 | 0.107 | 7.84E-154 | Conj-1 |
| NFE2L2         | 7.20E-158 | 0.444191 | 0.895 | 0.799 | 1.31E-153 | Conj-1 |
| OVOL1          | 2.25E-156 | 0.334691 | 0.631 | 0.327 | 4.09E-152 | Conj-1 |
| RPS16          | 9.53E-156 | 0.266542 | 0.997 | 0.994 | 1.74E-151 | Conj-1 |
| ZNF593         | 2.40E-155 | 0.333484 | 0.584 | 0.298 | 4.36E-151 | Conj-1 |

|                |           |          |       |       |           |        |
|----------------|-----------|----------|-------|-------|-----------|--------|
| TXN            | 3.19E-155 | 0.46864  | 0.998 | 0.979 | 5.80E-151 | Conj-1 |
| RAC1           | 7.57E-155 | 0.283559 | 0.979 | 0.951 | 1.38E-150 | Conj-1 |
| EHBP1          | 2.30E-153 | 0.275693 | 0.441 | 0.188 | 4.19E-149 | Conj-1 |
| TNFSF10        | 7.85E-153 | 0.419326 | 0.851 | 0.624 | 1.43E-148 | Conj-1 |
| FAM83A         | 3.66E-152 | 0.381045 | 0.804 | 0.553 | 6.66E-148 | Conj-1 |
| HNRNPA1        | 3.82E-147 | 0.263748 | 0.984 | 0.968 | 6.96E-143 | Conj-1 |
| SRSF5          | 5.30E-147 | 0.319357 | 0.979 | 0.933 | 9.66E-143 | Conj-1 |
| GPRC5C         | 7.39E-142 | 0.304871 | 0.53  | 0.273 | 1.35E-137 | Conj-1 |
| TUBB2A         | 1.88E-140 | 0.374087 | 0.916 | 0.746 | 3.42E-136 | Conj-1 |
| AES            | 1.38E-138 | 0.331197 | 0.835 | 0.618 | 2.50E-134 | Conj-1 |
| AKR1A1         | 2.61E-137 | 0.342615 | 0.835 | 0.64  | 4.76E-133 | Conj-1 |
| ARPC3          | 3.86E-137 | 0.302765 | 0.948 | 0.872 | 7.03E-133 | Conj-1 |
| ALDH2          | 4.86E-137 | 0.305241 | 0.627 | 0.349 | 8.85E-133 | Conj-1 |
| TUBB4B         | 2.69E-135 | 0.376644 | 0.972 | 0.915 | 4.91E-131 | Conj-1 |
| ZNF750         | 1.82E-134 | 0.278522 | 0.561 | 0.283 | 3.31E-130 | Conj-1 |
| MDH2           | 5.39E-134 | 0.315776 | 0.81  | 0.596 | 9.82E-130 | Conj-1 |
| FXD3           | 1.73E-131 | 0.314606 | 0.995 | 0.847 | 3.16E-127 | Conj-1 |
| RIPK4          | 1.64E-124 | 0.317308 | 0.615 | 0.354 | 3.00E-120 | Conj-1 |
| GLTSCR2        | 4.61E-124 | 0.28251  | 0.909 | 0.816 | 8.39E-120 | Conj-1 |
| BHLHE40        | 6.10E-124 | 0.34065  | 0.889 | 0.711 | 1.11E-119 | Conj-1 |
| SLC25A5        | 2.50E-123 | 0.316186 | 0.94  | 0.865 | 4.54E-119 | Conj-1 |
| HIST1H1C       | 3.67E-123 | 0.329441 | 0.427 | 0.197 | 6.68E-119 | Conj-1 |
| EFNA1          | 1.05E-122 | 0.343627 | 0.871 | 0.677 | 1.90E-118 | Conj-1 |
| PSMB8          | 1.06E-122 | 0.312896 | 0.694 | 0.452 | 1.93E-118 | Conj-1 |
| ATF3           | 3.15E-122 | 0.265345 | 0.897 | 0.672 | 5.74E-118 | Conj-1 |
| MGST1          | 5.26E-121 | 0.491798 | 0.451 | 0.229 | 9.57E-117 | Conj-1 |
| COX8A          | 2.11E-120 | 0.27602  | 0.935 | 0.838 | 3.85E-116 | Conj-1 |
| ETS2           | 1.68E-118 | 0.270441 | 0.585 | 0.326 | 3.07E-114 | Conj-1 |
| TCEA3          | 2.55E-117 | 0.289092 | 0.726 | 0.467 | 4.64E-113 | Conj-1 |
| PIM3           | 3.25E-117 | 0.315207 | 0.746 | 0.515 | 5.91E-113 | Conj-1 |
| CDKN2B         | 5.92E-117 | 0.273778 | 0.498 | 0.253 | 1.08E-112 | Conj-1 |
| VAV3           | 1.33E-115 | 0.311846 | 0.645 | 0.399 | 2.42E-111 | Conj-1 |
| GPR87          | 1.50E-114 | 0.273989 | 0.528 | 0.29  | 2.73E-110 | Conj-1 |
| PSMB10         | 3.19E-111 | 0.30523  | 0.671 | 0.44  | 5.81E-107 | Conj-1 |
| GAS5           | 1.62E-110 | 0.253196 | 0.98  | 0.928 | 2.95E-106 | Conj-1 |
| NOTCH2NL       | 9.83E-109 | 0.302437 | 0.749 | 0.528 | 1.79E-104 | Conj-1 |
| NFKBIA         | 1.10E-106 | 0.305084 | 0.978 | 0.938 | 2.00E-102 | Conj-1 |
| NFKBIZ         | 1.43E-103 | 0.271445 | 0.549 | 0.314 | 2.60E-99  | Conj-1 |
| HS3ST1         | 8.65E-102 | 0.348913 | 0.333 | 0.146 | 1.57E-97  | Conj-1 |
| EIF6           | 1.27E-101 | 0.286746 | 0.902 | 0.753 | 2.31E-97  | Conj-1 |
| RAB25          | 6.07E-99  | 0.258585 | 0.813 | 0.555 | 1.11E-94  | Conj-1 |
| PRSS8          | 1.13E-97  | 0.254983 | 0.592 | 0.359 | 2.06E-93  | Conj-1 |
| NOL3           | 2.23E-97  | 0.260857 | 0.547 | 0.323 | 4.06E-93  | Conj-1 |
| ARL4D          | 2.15E-96  | 0.319302 | 0.938 | 0.807 | 3.92E-92  | Conj-1 |
| ENSG0000019888 | 3.99E-96  | 0.312626 | 0.997 | 0.955 | 7.27E-92  | Conj-1 |
| CCDC12         | 7.92E-96  | 0.280636 | 0.8   | 0.586 | 1.44E-91  | Conj-1 |
| CITED2         | 1.75E-95  | 0.274378 | 0.809 | 0.627 | 3.19E-91  | Conj-1 |
| POLR1D         | 7.59E-93  | 0.253713 | 0.935 | 0.814 | 1.38E-88  | Conj-1 |

|                 |          |          |       |       |          |        |
|-----------------|----------|----------|-------|-------|----------|--------|
| CYBA            | 5.54E-92 | 0.265772 | 0.728 | 0.53  | 1.01E-87 | Conj-1 |
| CHMP1B          | 1.45E-89 | 0.297988 | 0.877 | 0.722 | 2.63E-85 | Conj-1 |
| L32131          | 1.89E-88 | 0.260601 | 0.878 | 0.726 | 3.44E-84 | Conj-1 |
| TOB2            | 3.39E-87 | 0.25217  | 0.562 | 0.348 | 6.18E-83 | Conj-1 |
| PDCD4           | 3.97E-85 | 0.294789 | 0.854 | 0.691 | 7.23E-81 | Conj-1 |
| PTP4A1          | 7.75E-83 | 0.298103 | 0.782 | 0.596 | 1.41E-78 | Conj-1 |
| ARL6IP1         | 1.53E-82 | 0.25236  | 0.878 | 0.765 | 2.79E-78 | Conj-1 |
| MPZL2           | 1.57E-81 | 0.292729 | 0.858 | 0.662 | 2.87E-77 | Conj-1 |
| RPL22L1         | 7.47E-80 | 0.253057 | 0.742 | 0.56  | 1.36E-75 | Conj-1 |
| THRB            | 2.17E-79 | 0.264548 | 0.764 | 0.559 | 3.95E-75 | Conj-1 |
| IL1RN           | 2.42E-79 | 0.630563 | 0.698 | 0.542 | 4.41E-75 | Conj-1 |
| SAT1            | 2.11E-72 | 0.25746  | 1     | 0.989 | 3.85E-68 | Conj-1 |
| ENSG00000198841 | 3.87E-71 | 0.28373  | 0.975 | 0.87  | 7.05E-67 | Conj-1 |
| APOBEC3A        | 5.34E-68 | 0.636582 | 0.518 | 0.321 | 9.73E-64 | Conj-1 |
| SERPIN1         | 1.73E-61 | 0.281932 | 0.735 | 0.583 | 3.14E-57 | Conj-1 |
| FOSL1           | 9.50E-49 | 0.42678  | 0.453 | 0.298 | 1.73E-44 | Conj-1 |
| CRIP1           | 9.47E-30 | 0.437973 | 0.794 | 0.746 | 1.72E-25 | Conj-1 |
| GADD45A         | 4.20E-28 | 0.253936 | 0.685 | 0.59  | 7.64E-24 | Conj-1 |
| PLAUR           | 4.65E-24 | 0.417961 | 0.38  | 0.278 | 8.46E-20 | Conj-1 |
| FGFBP1          | 7.18E-08 | 0.264509 | 0.479 | 0.429 | 0.001307 | Conj-1 |
| TM4SF1          | 6.51E-07 | 0.399774 | 0.722 | 0.682 | 0.011848 | Conj-1 |
| CXCL14          | 0        | 1.591442 | 1     | 0.876 | 0        | Epi-B1 |
| KRT14           | 0        | 1.5182   | 0.933 | 0.531 | 0        | Epi-B1 |
| CPVL            | 0        | 1.327566 | 0.902 | 0.095 | 0        | Epi-B1 |
| IGFBP7          | 0        | 1.304826 | 0.998 | 0.611 | 0        | Epi-B1 |
| ALDH3A1         | 0        | 1.199679 | 0.999 | 0.974 | 0        | Epi-B1 |
| BCAM            | 0        | 1.156444 | 0.927 | 0.249 | 0        | Epi-B1 |
| GJB6            | 0        | 1.1312   | 0.998 | 0.573 | 0        | Epi-B1 |
| SPARC           | 0        | 1.100211 | 0.977 | 0.381 | 0        | Epi-B1 |
| COL17A1         | 0        | 1.079008 | 0.979 | 0.42  | 0        | Epi-B1 |
| NQO1            | 0        | 1.068249 | 0.999 | 0.94  | 0        | Epi-B1 |
| CAV1            | 0        | 1.041249 | 0.878 | 0.179 | 0        | Epi-B1 |
| CTSL2           | 0        | 0.990495 | 0.998 | 0.604 | 0        | Epi-B1 |
| NTRK2           | 0        | 0.986706 | 0.885 | 0.221 | 0        | Epi-B1 |
| TGFBI           | 0        | 0.918198 | 0.999 | 0.89  | 0        | Epi-B1 |
| FTH1            | 0        | 0.874095 | 1     | 1     | 0        | Epi-B1 |
| S100A2          | 0        | 0.839896 | 0.803 | 0.379 | 0        | Epi-B1 |
| CRTAC1          | 0        | 0.834616 | 0.992 | 0.661 | 0        | Epi-B1 |
| S100A10         | 0        | 0.813292 | 1     | 0.944 | 0        | Epi-B1 |
| HOMER3          | 0        | 0.791025 | 0.867 | 0.368 | 0        | Epi-B1 |
| MOXD1           | 0        | 0.782163 | 0.705 | 0.106 | 0        | Epi-B1 |
| DST             | 0        | 0.768071 | 0.828 | 0.3   | 0        | Epi-B1 |
| EFEMP1          | 0        | 0.766986 | 0.823 | 0.244 | 0        | Epi-B1 |
| CLU             | 0        | 0.759112 | 1     | 0.99  | 0        | Epi-B1 |
| IVNS1ABP        | 0        | 0.746211 | 0.859 | 0.405 | 0        | Epi-B1 |
| GAPDH           | 0        | 0.738834 | 1     | 0.998 | 0        | Epi-B1 |
| WNT10A          | 0        | 0.738677 | 0.668 | 0.051 | 0        | Epi-B1 |
| GJB2            | 0        | 0.73511  | 0.997 | 0.633 | 0        | Epi-B1 |



|                |           |          |       |       |           |        |
|----------------|-----------|----------|-------|-------|-----------|--------|
| ATP1B3         | 0         | 0.710723 | 0.983 | 0.802 | 0         | Epi-B1 |
| SUCO           | 0         | 0.702307 | 0.925 | 0.494 | 0         | Epi-B1 |
| RASSF6         | 0         | 0.681604 | 0.761 | 0.278 | 0         | Epi-B1 |
| TKT            | 0         | 0.676103 | 0.999 | 0.849 | 0         | Epi-B1 |
| KCNN4          | 0         | 0.670544 | 0.814 | 0.292 | 0         | Epi-B1 |
| VIT            | 0         | 0.656052 | 0.683 | 0.099 | 0         | Epi-B1 |
| TSPAN1         | 0         | 0.655157 | 0.847 | 0.497 | 0         | Epi-B1 |
| HSD17B2        | 0         | 0.636309 | 0.612 | 0.103 | 0         | Epi-B1 |
| IGFBP6         | 0         | 0.612162 | 1     | 0.821 | 0         | Epi-B1 |
| ASCL2          | 0         | 0.606588 | 0.598 | 0.117 | 0         | Epi-B1 |
| SLC3A2         | 0         | 0.604098 | 0.967 | 0.763 | 0         | Epi-B1 |
| C1QBP          | 0         | 0.592019 | 0.989 | 0.859 | 0         | Epi-B1 |
| CLTB           | 0         | 0.576101 | 0.986 | 0.89  | 0         | Epi-B1 |
| HSPA2          | 0         | 0.574617 | 0.764 | 0.359 | 0         | Epi-B1 |
| DAAM1          | 0         | 0.57385  | 0.929 | 0.599 | 0         | Epi-B1 |
| FTH1P3         | 0         | 0.572356 | 0.887 | 0.547 | 0         | Epi-B1 |
| AKR1B1         | 0         | 0.571277 | 0.832 | 0.417 | 0         | Epi-B1 |
| PKM            | 0         | 0.563074 | 0.999 | 0.978 | 0         | Epi-B1 |
| CAV2           | 0         | 0.557461 | 0.698 | 0.226 | 0         | Epi-B1 |
| LGALS7         | 0         | 0.553182 | 0.682 | 0.276 | 0         | Epi-B1 |
| PYCR2          | 0         | 0.54835  | 0.753 | 0.364 | 0         | Epi-B1 |
| TMEM100        | 0         | 0.542387 | 0.665 | 0.245 | 0         | Epi-B1 |
| CLCA2          | 0         | 0.518869 | 0.796 | 0.398 | 0         | Epi-B1 |
| HMGN3          | 0         | 0.512332 | 0.998 | 0.921 | 0         | Epi-B1 |
| GDPD2          | 0         | 0.487692 | 0.615 | 0.208 | 0         | Epi-B1 |
| SOD1           | 0         | 0.480129 | 0.988 | 0.888 | 0         | Epi-B1 |
| LDHA           | 0         | 0.477725 | 1     | 0.989 | 0         | Epi-B1 |
| MMP28          | 0         | 0.46633  | 0.541 | 0.115 | 0         | Epi-B1 |
| GPX1           | 0         | 0.462709 | 0.995 | 0.94  | 0         | Epi-B1 |
| SLC7A8         | 0         | 0.449605 | 0.608 | 0.2   | 0         | Epi-B1 |
| AGL            | 0         | 0.40738  | 0.566 | 0.188 | 0         | Epi-B1 |
| TGM2           | 0         | 0.40471  | 0.525 | 0.157 | 0         | Epi-B1 |
| CDH13          | 0         | 0.38239  | 0.461 | 0.099 | 0         | Epi-B1 |
| CRLF1          | 0         | 0.312884 | 0.397 | 0.091 | 0         | Epi-B1 |
| LAMA3          | 0         | 0.275625 | 0.346 | 0.06  | 0         | Epi-B1 |
| PDPN           | 0         | 0.264539 | 0.349 | 0.065 | 0         | Epi-B1 |
| BASP1          | 0         | 0.263751 | 0.3   | 0.051 | 0         | Epi-B1 |
| GSTA4          | 4.13E-302 | 0.531623 | 0.901 | 0.571 | 7.51E-298 | Epi-B1 |
| RGS20          | 2.15E-301 | 0.255419 | 0.306 | 0.057 | 3.91E-297 | Epi-B1 |
| PTRF           | 3.98E-293 | 0.359777 | 0.862 | 0.399 | 7.25E-289 | Epi-B1 |
| TNNT1          | 4.04E-291 | 0.280119 | 0.297 | 0.056 | 7.36E-287 | Epi-B1 |
| GJA1           | 3.08E-289 | 0.537322 | 0.957 | 0.658 | 5.60E-285 | Epi-B1 |
| TSPAN15        | 2.56E-284 | 0.37524  | 0.499 | 0.163 | 4.66E-280 | Epi-B1 |
| HCFC1R1        | 2.63E-280 | 0.47438  | 0.795 | 0.447 | 4.79E-276 | Epi-B1 |
| LGALS7B        | 1.14E-277 | 0.584203 | 0.649 | 0.277 | 2.07E-273 | Epi-B1 |
| ENSG0000019880 | 2.41E-273 | 0.381867 | 0.998 | 0.998 | 4.39E-269 | Epi-B1 |
| ARHGDI         | 1.51E-270 | 0.493917 | 0.755 | 0.395 | 2.74E-266 | Epi-B1 |
| LAMB1          | 6.45E-270 | 0.26325  | 0.327 | 0.072 | 1.17E-265 | Epi-B1 |

|                |           |          |       |       |           |        |
|----------------|-----------|----------|-------|-------|-----------|--------|
| PTGES          | 2.66E-269 | 0.495845 | 0.929 | 0.688 | 4.85E-265 | Epi-B1 |
| RDX            | 9.92E-268 | 0.476204 | 0.872 | 0.57  | 1.81E-263 | Epi-B1 |
| SLC2A1         | 1.92E-264 | 0.512526 | 0.974 | 0.844 | 3.50E-260 | Epi-B1 |
| P4HA2          | 8.04E-261 | 0.371329 | 0.529 | 0.185 | 1.46E-256 | Epi-B1 |
| S100A6         | 1.72E-252 | 0.3116   | 1     | 0.999 | 3.13E-248 | Epi-B1 |
| ENSG0000019889 | 1.99E-250 | 0.410931 | 0.998 | 0.986 | 3.62E-246 | Epi-B1 |
| ENSG0000019888 | 4.70E-250 | 0.382133 | 0.999 | 0.998 | 8.55E-246 | Epi-B1 |
| ENO1           | 1.57E-249 | 0.415972 | 1     | 0.993 | 2.87E-245 | Epi-B1 |
| LAMB3          | 5.77E-242 | 0.361231 | 0.576 | 0.225 | 1.05E-237 | Epi-B1 |
| GSN            | 5.99E-242 | 0.406887 | 0.996 | 0.894 | 1.09E-237 | Epi-B1 |
| SOSTDC1        | 6.79E-242 | 0.272574 | 0.339 | 0.086 | 1.24E-237 | Epi-B1 |
| HN1            | 1.89E-240 | 0.437659 | 0.854 | 0.542 | 3.44E-236 | Epi-B1 |
| SLC31A2        | 2.44E-240 | 0.337541 | 0.469 | 0.163 | 4.44E-236 | Epi-B1 |
| ENSG0000021145 | 3.20E-238 | 0.505893 | 0.997 | 0.997 | 5.82E-234 | Epi-B1 |
| TNFRSF12A      | 5.79E-236 | 0.497631 | 0.703 | 0.342 | 1.05E-231 | Epi-B1 |
| GAS1           | 9.69E-235 | 0.349112 | 0.452 | 0.15  | 1.77E-230 | Epi-B1 |
| FAM134B        | 2.56E-232 | 0.391631 | 0.615 | 0.267 | 4.67E-228 | Epi-B1 |
| RAB4A          | 1.97E-231 | 0.414239 | 0.922 | 0.712 | 3.59E-227 | Epi-B1 |
| PLLP           | 2.84E-231 | 0.329545 | 0.493 | 0.182 | 5.17E-227 | Epi-B1 |
| IMPA2          | 7.27E-229 | 0.37336  | 0.58  | 0.246 | 1.32E-224 | Epi-B1 |
| SNAI2          | 8.19E-226 | 0.421472 | 0.671 | 0.319 | 1.49E-221 | Epi-B1 |
| WDR54          | 7.28E-225 | 0.309302 | 0.472 | 0.166 | 1.33E-220 | Epi-B1 |
| ENSG0000019893 | 5.26E-222 | 0.362702 | 0.997 | 0.998 | 9.58E-218 | Epi-B1 |
| LYPD6B         | 1.05E-215 | 0.35191  | 0.614 | 0.273 | 1.90E-211 | Epi-B1 |
| ETV4           | 1.30E-215 | 0.254509 | 0.349 | 0.1   | 2.36E-211 | Epi-B1 |
| ALDH1A1        | 1.27E-205 | 0.423387 | 0.997 | 0.858 | 2.31E-201 | Epi-B1 |
| S100A13        | 1.42E-205 | 0.406539 | 0.852 | 0.583 | 2.58E-201 | Epi-B1 |
| APP            | 1.70E-198 | 0.395581 | 0.827 | 0.531 | 3.10E-194 | Epi-B1 |
| C16orf74       | 8.17E-197 | 0.29999  | 0.498 | 0.2   | 1.49E-192 | Epi-B1 |
| PHGDH          | 2.15E-196 | 0.366667 | 0.67  | 0.348 | 3.92E-192 | Epi-B1 |
| ENSG0000019878 | 8.87E-193 | 0.380523 | 0.994 | 0.972 | 1.62E-188 | Epi-B1 |
| CAPS           | 4.58E-190 | 0.402706 | 0.796 | 0.474 | 8.34E-186 | Epi-B1 |
| CBR1           | 5.91E-190 | 0.392913 | 0.892 | 0.663 | 1.08E-185 | Epi-B1 |
| PDLIM1         | 1.31E-189 | 0.357509 | 0.946 | 0.748 | 2.38E-185 | Epi-B1 |
| FHOD3          | 2.54E-186 | 0.278829 | 0.452 | 0.171 | 4.63E-182 | Epi-B1 |
| KRT18          | 1.37E-184 | 0.426378 | 0.944 | 0.716 | 2.49E-180 | Epi-B1 |
| ARL4C          | 8.82E-183 | 0.311516 | 0.424 | 0.159 | 1.61E-178 | Epi-B1 |
| ENSG0000019872 | 1.26E-179 | 0.309664 | 0.998 | 0.993 | 2.30E-175 | Epi-B1 |
| G6PD           | 1.08E-178 | 0.357835 | 0.635 | 0.337 | 1.97E-174 | Epi-B1 |
| NTF3           | 9.03E-177 | 0.289106 | 0.481 | 0.192 | 1.64E-172 | Epi-B1 |
| GPX4           | 1.07E-175 | 0.305748 | 0.992 | 0.962 | 1.94E-171 | Epi-B1 |
| BHLHE41        | 9.77E-172 | 0.351189 | 0.598 | 0.298 | 1.78E-167 | Epi-B1 |
| GYG1           | 3.08E-169 | 0.360337 | 0.857 | 0.556 | 5.60E-165 | Epi-B1 |
| NGFRAP1        | 2.84E-168 | 0.344745 | 0.932 | 0.74  | 5.18E-164 | Epi-B1 |
| ACTG1          | 3.97E-168 | 0.264527 | 0.999 | 0.994 | 7.22E-164 | Epi-B1 |
| CNTN4          | 6.26E-166 | 0.261964 | 0.413 | 0.156 | 1.14E-161 | Epi-B1 |
| CRYAB          | 4.17E-163 | 0.370698 | 0.982 | 0.867 | 7.60E-159 | Epi-B1 |
| C17orf76-AS1   | 5.50E-160 | 0.284579 | 0.997 | 0.96  | 1.00E-155 | Epi-B1 |

|                |           |          |       |       |           |        |
|----------------|-----------|----------|-------|-------|-----------|--------|
| CFI            | 3.23E-159 | 0.271075 | 0.494 | 0.222 | 5.88E-155 | Epi-B1 |
| NUDT14         | 4.13E-158 | 0.299986 | 0.601 | 0.309 | 7.52E-154 | Epi-B1 |
| ENSG0000021008 | 5.63E-156 | 0.342173 | 0.999 | 1     | 1.02E-151 | Epi-B1 |
| EXOSC7         | 3.25E-153 | 0.33818  | 0.815 | 0.572 | 5.93E-149 | Epi-B1 |
| DUSP14         | 1.57E-150 | 0.321291 | 0.623 | 0.347 | 2.86E-146 | Epi-B1 |
| UACA           | 5.13E-149 | 0.308722 | 0.485 | 0.229 | 9.34E-145 | Epi-B1 |
| TMEM14A        | 3.51E-147 | 0.335463 | 0.747 | 0.478 | 6.40E-143 | Epi-B1 |
| MATN2          | 8.76E-146 | 0.271832 | 0.532 | 0.251 | 1.60E-141 | Epi-B1 |
| ZBED2          | 9.92E-146 | 0.25912  | 0.404 | 0.165 | 1.81E-141 | Epi-B1 |
| RNF39          | 5.08E-145 | 0.38095  | 0.705 | 0.422 | 9.25E-141 | Epi-B1 |
| SRPK2          | 3.35E-143 | 0.309613 | 0.687 | 0.414 | 6.10E-139 | Epi-B1 |
| CCDC51         | 4.62E-143 | 0.313848 | 0.571 | 0.3   | 8.40E-139 | Epi-B1 |
| DDB2           | 4.67E-139 | 0.292381 | 0.608 | 0.33  | 8.50E-135 | Epi-B1 |
| BSG            | 1.06E-138 | 0.302059 | 0.95  | 0.836 | 1.92E-134 | Epi-B1 |
| TUBB           | 9.04E-138 | 0.322273 | 0.936 | 0.814 | 1.65E-133 | Epi-B1 |
| ADH5           | 2.35E-135 | 0.326466 | 0.799 | 0.565 | 4.27E-131 | Epi-B1 |
| TSPAN3         | 2.76E-134 | 0.296892 | 0.632 | 0.361 | 5.03E-130 | Epi-B1 |
| TPD52L1        | 4.45E-133 | 0.29667  | 0.794 | 0.521 | 8.10E-129 | Epi-B1 |
| PRNP           | 2.03E-132 | 0.364509 | 0.897 | 0.735 | 3.69E-128 | Epi-B1 |
| IL18           | 5.15E-131 | 0.303637 | 0.741 | 0.463 | 9.38E-127 | Epi-B1 |
| DUSP23         | 3.78E-130 | 0.296268 | 0.938 | 0.782 | 6.89E-126 | Epi-B1 |
| ALDH7A1        | 2.84E-128 | 0.303722 | 0.819 | 0.578 | 5.17E-124 | Epi-B1 |
| TNFRSF1A       | 1.07E-127 | 0.310279 | 0.795 | 0.577 | 1.94E-123 | Epi-B1 |
| TP53TG1        | 2.10E-126 | 0.322448 | 0.871 | 0.683 | 3.81E-122 | Epi-B1 |
| PLP2           | 8.25E-125 | 0.268092 | 0.986 | 0.887 | 1.50E-120 | Epi-B1 |
| CRYZ           | 1.02E-123 | 0.280428 | 0.536 | 0.284 | 1.85E-119 | Epi-B1 |
| CCDC109B       | 4.45E-123 | 0.262151 | 0.538 | 0.288 | 8.11E-119 | Epi-B1 |
| ENSG0000021290 | 3.57E-119 | 0.306417 | 0.951 | 0.824 | 6.50E-115 | Epi-B1 |
| RHBDD2         | 3.03E-118 | 0.31606  | 0.775 | 0.555 | 5.51E-114 | Epi-B1 |
| ITGA6          | 2.38E-117 | 0.25377  | 0.497 | 0.251 | 4.34E-113 | Epi-B1 |
| ENSG0000019884 | 6.53E-117 | 0.320293 | 0.98  | 0.87  | 1.19E-112 | Epi-B1 |
| RAET1G         | 1.19E-115 | 0.275552 | 0.679 | 0.411 | 2.16E-111 | Epi-B1 |
| PID1           | 7.11E-114 | 0.271001 | 0.594 | 0.33  | 1.29E-109 | Epi-B1 |
| ENSG0000019888 | 2.54E-112 | 0.268313 | 0.994 | 0.955 | 4.62E-108 | Epi-B1 |
| RNASET2        | 5.09E-112 | 0.253395 | 0.654 | 0.408 | 9.27E-108 | Epi-B1 |
| OCIAD2         | 1.98E-111 | 0.286038 | 0.838 | 0.609 | 3.60E-107 | Epi-B1 |
| SMARCA2        | 5.83E-111 | 0.272096 | 0.599 | 0.354 | 1.06E-106 | Epi-B1 |
| ITGB1          | 1.26E-109 | 0.298486 | 0.803 | 0.575 | 2.29E-105 | Epi-B1 |
| MAT2B          | 6.10E-108 | 0.258576 | 0.646 | 0.398 | 1.11E-103 | Epi-B1 |
| HCAR2          | 4.27E-107 | 0.511448 | 0.884 | 0.663 | 7.78E-103 | Epi-B1 |
| BCL2L13        | 1.62E-106 | 0.270834 | 0.937 | 0.743 | 2.94E-102 | Epi-B1 |
| MED24          | 1.01E-105 | 0.292855 | 0.449 | 0.237 | 1.84E-101 | Epi-B1 |
| AGR2           | 1.56E-104 | 0.259962 | 0.88  | 0.616 | 2.84E-100 | Epi-B1 |
| IER3           | 6.67E-104 | 0.308562 | 0.953 | 0.815 | 1.21E-99  | Epi-B1 |
| MRPS6          | 8.35E-104 | 0.28494  | 0.773 | 0.562 | 1.52E-99  | Epi-B1 |
| IL20RB         | 1.86E-102 | 0.280079 | 0.753 | 0.508 | 3.38E-98  | Epi-B1 |
| GSTO1          | 9.19E-102 | 0.273307 | 0.882 | 0.755 | 1.67E-97  | Epi-B1 |
| BLCAP          | 1.49E-101 | 0.262758 | 0.731 | 0.505 | 2.72E-97  | Epi-B1 |

|                |           |          |       |       |           |        |
|----------------|-----------|----------|-------|-------|-----------|--------|
| LIPA           | 8.69E-99  | 0.259365 | 0.469 | 0.256 | 1.58E-94  | Epi-B1 |
| AVPI1          | 1.66E-93  | 0.3129   | 0.72  | 0.505 | 3.02E-89  | Epi-B1 |
| C7orf73        | 7.20E-92  | 0.265207 | 0.818 | 0.643 | 1.31E-87  | Epi-B1 |
| NEDD9          | 3.54E-75  | 0.280616 | 0.319 | 0.154 | 6.44E-71  | Epi-B1 |
| KRT12          | 3.39E-74  | 0.255655 | 0.997 | 0.805 | 6.17E-70  | Epi-B1 |
| PLK2           | 1.92E-72  | 0.281674 | 0.713 | 0.507 | 3.50E-68  | Epi-B1 |
| ARL4D          | 2.86E-68  | 0.254558 | 0.962 | 0.804 | 5.21E-64  | Epi-B1 |
| SRSF7          | 4.08E-65  | 0.290193 | 0.935 | 0.843 | 7.43E-61  | Epi-B1 |
| HSPA5          | 3.35E-51  | 0.303191 | 0.968 | 0.958 | 6.09E-47  | Epi-B1 |
| CITED2         | 8.48E-43  | 0.38709  | 0.748 | 0.636 | 1.54E-38  | Epi-B1 |
| HCAR3          | 2.54E-27  | 0.369616 | 0.675 | 0.571 | 4.62E-23  | Epi-B1 |
| CRTAC1         | 0         | 0.784068 | 0.977 | 0.671 | 0         | Epi-S1 |
| KRT5           | 1.22E-286 | 0.615947 | 1     | 0.869 | 2.23E-282 | Epi-S1 |
| GJB2           | 2.83E-278 | 0.666073 | 0.981 | 0.645 | 5.16E-274 | Epi-S1 |
| MT1X           | 4.30E-271 | 0.616215 | 0.997 | 0.974 | 7.82E-267 | Epi-S1 |
| DSP            | 1.37E-262 | 0.617343 | 0.977 | 0.738 | 2.49E-258 | Epi-S1 |
| GSN            | 9.29E-217 | 0.51302  | 0.99  | 0.898 | 1.69E-212 | Epi-S1 |
| KRT12          | 2.13E-196 | 0.62124  | 0.978 | 0.812 | 3.88E-192 | Epi-S1 |
| GJA1           | 6.71E-193 | 0.54498  | 0.922 | 0.669 | 1.22E-188 | Epi-S1 |
| ALDH1A1        | 4.15E-181 | 0.473721 | 0.993 | 0.863 | 7.55E-177 | Epi-S1 |
| IGFBP7         | 2.23E-179 | 0.438207 | 0.933 | 0.628 | 4.07E-175 | Epi-S1 |
| COL17A1        | 1.32E-177 | 0.592557 | 0.823 | 0.452 | 2.41E-173 | Epi-S1 |
| FAM84A         | 4.15E-168 | 0.511948 | 0.675 | 0.383 | 7.56E-164 | Epi-S1 |
| VSNL1          | 6.03E-168 | 0.497798 | 0.826 | 0.581 | 1.10E-163 | Epi-S1 |
| LYPD1          | 3.71E-162 | 0.34328  | 0.346 | 0.11  | 6.75E-158 | Epi-S1 |
| ENSG0000019880 | 4.32E-156 | 0.470343 | 1     | 0.998 | 7.86E-152 | Epi-S1 |
| CXCL14         | 4.48E-156 | 0.337688 | 0.973 | 0.882 | 8.16E-152 | Epi-S1 |
| LY6D           | 2.48E-155 | 0.688238 | 0.699 | 0.409 | 4.51E-151 | Epi-S1 |
| SEC16B         | 4.60E-149 | 0.373227 | 0.42  | 0.16  | 8.38E-145 | Epi-S1 |
| CCND1          | 1.68E-142 | 0.489817 | 0.842 | 0.646 | 3.07E-138 | Epi-S1 |
| GJB6           | 8.87E-140 | 0.40466  | 0.952 | 0.589 | 1.61E-135 | Epi-S1 |
| TGFBI          | 6.97E-139 | 0.455446 | 0.986 | 0.894 | 1.27E-134 | Epi-S1 |
| ELP4           | 1.70E-134 | 0.423219 | 0.586 | 0.319 | 3.10E-130 | Epi-S1 |
| FABP5          | 4.19E-134 | 0.417464 | 0.997 | 0.939 | 7.64E-130 | Epi-S1 |
| AIM1           | 2.12E-126 | 0.422012 | 0.725 | 0.434 | 3.86E-122 | Epi-S1 |
| ENSG0000019889 | 2.57E-125 | 0.429685 | 1     | 0.986 | 4.67E-121 | Epi-S1 |
| ENSG0000019871 | 2.85E-125 | 0.435254 | 1     | 0.996 | 5.20E-121 | Epi-S1 |
| TKT            | 8.85E-123 | 0.400131 | 0.986 | 0.855 | 1.61E-118 | Epi-S1 |
| LDHB           | 4.80E-122 | 0.467964 | 0.891 | 0.832 | 8.74E-118 | Epi-S1 |
| SUCO           | 2.47E-121 | 0.395825 | 0.781 | 0.522 | 4.50E-117 | Epi-S1 |
| DSC2           | 2.94E-119 | 0.415015 | 0.786 | 0.505 | 5.35E-115 | Epi-S1 |
| DSC3           | 9.77E-119 | 0.474357 | 0.738 | 0.493 | 1.78E-114 | Epi-S1 |
| KRT3           | 5.15E-117 | 0.495363 | 0.857 | 0.547 | 9.38E-113 | Epi-S1 |
| CSRP2          | 1.41E-113 | 0.410877 | 0.977 | 0.871 | 2.56E-109 | Epi-S1 |
| FA2H           | 6.56E-113 | 0.406157 | 0.604 | 0.346 | 1.19E-108 | Epi-S1 |
| ENSG0000019888 | 9.59E-113 | 0.38719  | 1     | 0.998 | 1.75E-108 | Epi-S1 |
| MRPL33         | 1.13E-110 | 0.324407 | 0.966 | 0.897 | 2.06E-106 | Epi-S1 |
| DSG1           | 2.45E-106 | 0.422958 | 0.719 | 0.464 | 4.46E-102 | Epi-S1 |

|                |           |          |       |       |           |        |
|----------------|-----------|----------|-------|-------|-----------|--------|
| MYH14          | 1.08E-105 | 0.383246 | 0.587 | 0.333 | 1.96E-101 | Epi-S1 |
| TRIM36         | 2.02E-99  | 0.333803 | 0.636 | 0.37  | 3.67E-95  | Epi-S1 |
| C8orf47        | 1.22E-93  | 0.306208 | 0.943 | 0.737 | 2.22E-89  | Epi-S1 |
| ENO1           | 2.31E-93  | 0.283237 | 0.997 | 0.994 | 4.20E-89  | Epi-S1 |
| UPK1B          | 3.16E-91  | 0.278139 | 0.937 | 0.707 | 5.76E-87  | Epi-S1 |
| LAMB3          | 5.53E-90  | 0.337851 | 0.47  | 0.246 | 1.01E-85  | Epi-S1 |
| ENSG0000019872 | 4.68E-88  | 0.359963 | 1     | 0.993 | 8.51E-84  | Epi-S1 |
| S100A4         | 2.75E-87  | 0.256706 | 1     | 0.995 | 5.01E-83  | Epi-S1 |
| TNFAIP3        | 6.22E-87  | 0.460954 | 0.494 | 0.283 | 1.13E-82  | Epi-S1 |
| PSAT1          | 6.65E-87  | 0.368723 | 0.735 | 0.543 | 1.21E-82  | Epi-S1 |
| CLCA2          | 7.74E-87  | 0.354895 | 0.648 | 0.425 | 1.41E-82  | Epi-S1 |
| RB1            | 1.06E-86  | 0.269867 | 0.777 | 0.497 | 1.93E-82  | Epi-S1 |
| CLDN1          | 3.49E-86  | 0.36778  | 0.775 | 0.554 | 6.36E-82  | Epi-S1 |
| CTSL2          | 2.36E-85  | 0.274016 | 0.957 | 0.619 | 4.30E-81  | Epi-S1 |
| NDUFA4L2       | 6.62E-85  | 0.341703 | 0.806 | 0.639 | 1.21E-80  | Epi-S1 |
| S100A10        | 5.86E-81  | 0.279197 | 0.973 | 0.948 | 1.07E-76  | Epi-S1 |
| MGARP          | 7.13E-79  | 0.3037   | 0.972 | 0.812 | 1.30E-74  | Epi-S1 |
| YBX3           | 3.06E-78  | 0.25847  | 0.936 | 0.918 | 5.57E-74  | Epi-S1 |
| ENSG0000019893 | 1.12E-77  | 0.348926 | 1     | 0.997 | 2.03E-73  | Epi-S1 |
| ENSG0000019878 | 7.81E-76  | 0.351654 | 0.997 | 0.973 | 1.42E-71  | Epi-S1 |
| DKK3           | 1.73E-75  | 0.317446 | 0.828 | 0.627 | 3.16E-71  | Epi-S1 |
| PIR            | 2.47E-73  | 0.26713  | 0.714 | 0.511 | 4.49E-69  | Epi-S1 |
| SERPINB5       | 7.95E-68  | 0.318771 | 0.901 | 0.705 | 1.45E-63  | Epi-S1 |
| TRIM29         | 2.43E-67  | 0.27898  | 0.938 | 0.762 | 4.42E-63  | Epi-S1 |
| TSPAN1         | 3.59E-67  | 0.277511 | 0.711 | 0.521 | 6.54E-63  | Epi-S1 |
| CAPG           | 8.55E-67  | 0.262634 | 0.892 | 0.823 | 1.56E-62  | Epi-S1 |
| ASPH           | 4.37E-64  | 0.289902 | 0.913 | 0.836 | 7.96E-60  | Epi-S1 |
| FRMD4B         | 6.34E-63  | 0.294722 | 0.531 | 0.344 | 1.15E-58  | Epi-S1 |
| ARHGEF3        | 3.87E-62  | 0.272454 | 0.523 | 0.338 | 7.06E-58  | Epi-S1 |
| PHLDA3         | 2.77E-61  | 0.25714  | 0.865 | 0.741 | 5.04E-57  | Epi-S1 |
| MT1G           | 4.63E-61  | 0.40507  | 0.452 | 0.267 | 8.43E-57  | Epi-S1 |
| LGALS7         | 1.08E-60  | 0.260178 | 0.502 | 0.306 | 1.97E-56  | Epi-S1 |
| SPINK5         | 3.55E-58  | 0.28661  | 0.43  | 0.257 | 6.46E-54  | Epi-S1 |
| CKAP4          | 1.37E-57  | 0.287172 | 0.602 | 0.424 | 2.50E-53  | Epi-S1 |
| SCD5           | 3.27E-57  | 0.258806 | 0.638 | 0.439 | 5.95E-53  | Epi-S1 |
| CTSC           | 5.35E-57  | 0.274759 | 0.748 | 0.561 | 9.73E-53  | Epi-S1 |
| JUP            | 8.20E-57  | 0.308298 | 0.821 | 0.645 | 1.49E-52  | Epi-S1 |
| NUP93          | 2.50E-53  | 0.25499  | 0.488 | 0.317 | 4.55E-49  | Epi-S1 |
| SIK1           | 1.27E-50  | 0.403325 | 0.61  | 0.448 | 2.32E-46  | Epi-S1 |
| DMRTA2         | 1.83E-50  | 0.266102 | 0.372 | 0.217 | 3.34E-46  | Epi-S1 |
| MARCKS         | 9.67E-49  | 0.29405  | 0.601 | 0.454 | 1.76E-44  | Epi-S1 |
| CDH1           | 8.11E-44  | 0.318081 | 0.389 | 0.244 | 1.48E-39  | Epi-S1 |
| IRF6           | 7.89E-43  | 0.270103 | 0.643 | 0.493 | 1.44E-38  | Epi-S1 |
| WNK1           | 1.23E-42  | 0.252071 | 0.422 | 0.28  | 2.25E-38  | Epi-S1 |
| PPL            | 4.99E-39  | 0.277308 | 0.457 | 0.318 | 9.09E-35  | Epi-S1 |
| GPNMB          | 8.06E-39  | 0.361344 | 0.658 | 0.54  | 1.47E-34  | Epi-S1 |
| RHOB           | 1.42E-38  | 0.269255 | 0.853 | 0.766 | 2.58E-34  | Epi-S1 |
| RAP2B          | 2.36E-36  | 0.283279 | 0.532 | 0.391 | 4.30E-32  | Epi-S1 |

|                |           |          |       |       |           |        |
|----------------|-----------|----------|-------|-------|-----------|--------|
| MALAT1         | 1.88E-35  | 0.327476 | 1     | 0.998 | 3.43E-31  | Epi-S1 |
| NEAT1          | 3.75E-33  | 0.388641 | 0.96  | 0.93  | 6.83E-29  | Epi-S1 |
| DSG3           | 5.91E-33  | 0.260317 | 0.289 | 0.172 | 1.08E-28  | Epi-S1 |
| ENSG0000021290 | 1.25E-30  | 0.259722 | 0.889 | 0.834 | 2.27E-26  | Epi-S1 |
| MBD2           | 2.75E-30  | 0.272572 | 0.386 | 0.269 | 5.00E-26  | Epi-S1 |
| RND3           | 1.60E-27  | 0.342187 | 0.713 | 0.609 | 2.91E-23  | Epi-S1 |
| FOSB           | 8.28E-27  | 0.355357 | 0.875 | 0.827 | 1.51E-22  | Epi-S1 |
| JUND           | 2.86E-18  | 0.495937 | 0.705 | 0.634 | 5.21E-14  | Epi-S1 |
| NR4A1          | 1.13E-16  | 0.297666 | 0.519 | 0.447 | 2.06E-12  | Epi-S1 |
| EGR1           | 3.08E-13  | 0.27295  | 0.901 | 0.862 | 5.60E-09  | Epi-S1 |
| KRT15          | 0         | 1.85377  | 0.872 | 0.401 | 0         | Epi-T  |
| RPS18          | 1.86E-289 | 0.533636 | 1     | 1     | 3.39E-285 | Epi-T  |
| RPS6           | 7.70E-271 | 0.516318 | 0.999 | 0.999 | 1.40E-266 | Epi-T  |
| RPS14          | 5.16E-250 | 0.400304 | 1     | 1     | 9.39E-246 | Epi-T  |
| RPL10          | 1.47E-247 | 0.448496 | 1     | 1     | 2.67E-243 | Epi-T  |
| RPL13          | 6.01E-246 | 0.492865 | 0.999 | 0.999 | 1.09E-241 | Epi-T  |
| RPL12          | 2.89E-245 | 0.498371 | 0.998 | 0.998 | 5.26E-241 | Epi-T  |
| RPL41          | 3.18E-240 | 0.350663 | 1     | 1     | 5.79E-236 | Epi-T  |
| RPLP1          | 7.09E-234 | 0.434466 | 1     | 1     | 1.29E-229 | Epi-T  |
| RPL32          | 1.16E-233 | 0.435756 | 0.998 | 0.999 | 2.12E-229 | Epi-T  |
| NUPR1          | 1.54E-223 | 0.705847 | 0.96  | 0.67  | 2.81E-219 | Epi-T  |
| CA12           | 5.27E-220 | 0.396756 | 0.42  | 0.101 | 9.60E-216 | Epi-T  |
| RPS15A         | 1.39E-219 | 0.467822 | 0.998 | 0.997 | 2.54E-215 | Epi-T  |
| RPL39          | 1.69E-211 | 0.384705 | 0.998 | 0.999 | 3.08E-207 | Epi-T  |
| AQP3           | 2.66E-211 | 0.731519 | 0.979 | 0.645 | 4.84E-207 | Epi-T  |
| RPL26          | 5.69E-210 | 0.388186 | 0.998 | 0.999 | 1.04E-205 | Epi-T  |
| RPL36          | 1.65E-209 | 0.386777 | 0.996 | 0.997 | 3.01E-205 | Epi-T  |
| RPS15          | 1.96E-208 | 0.337344 | 1     | 0.999 | 3.58E-204 | Epi-T  |
| RPS3A          | 6.13E-207 | 0.408202 | 0.999 | 0.998 | 1.12E-202 | Epi-T  |
| RPL10A         | 6.14E-207 | 0.406092 | 0.999 | 0.995 | 1.12E-202 | Epi-T  |
| FMO1           | 3.67E-205 | 0.53705  | 0.514 | 0.156 | 6.68E-201 | Epi-T  |
| RPL21          | 7.84E-204 | 0.386025 | 1     | 0.999 | 1.43E-199 | Epi-T  |
| RPL35          | 1.65E-202 | 0.363917 | 0.999 | 0.999 | 3.00E-198 | Epi-T  |
| RPL34          | 6.49E-202 | 0.387399 | 1     | 1     | 1.18E-197 | Epi-T  |
| RPL8           | 1.67E-201 | 0.399753 | 0.998 | 0.998 | 3.05E-197 | Epi-T  |
| RPL18A         | 5.82E-199 | 0.442175 | 0.997 | 0.997 | 1.06E-194 | Epi-T  |
| RPS19          | 4.02E-198 | 0.480441 | 0.998 | 0.998 | 7.32E-194 | Epi-T  |
| RPS28          | 1.19E-194 | 0.378678 | 1     | 0.999 | 2.18E-190 | Epi-T  |
| NDUFA4L2       | 1.91E-194 | 0.744605 | 0.929 | 0.635 | 3.48E-190 | Epi-T  |
| RPS27          | 7.65E-192 | 0.37741  | 1     | 1     | 1.39E-187 | Epi-T  |
| RPL11          | 8.51E-187 | 0.343048 | 0.999 | 0.999 | 1.55E-182 | Epi-T  |
| RPS13          | 3.11E-185 | 0.334204 | 1     | 0.998 | 5.67E-181 | Epi-T  |
| RPL29          | 7.26E-184 | 0.438326 | 0.995 | 0.992 | 1.32E-179 | Epi-T  |
| GPNMB          | 1.94E-183 | 0.639859 | 0.871 | 0.529 | 3.53E-179 | Epi-T  |
| RPS2           | 4.25E-182 | 0.447149 | 0.997 | 0.997 | 7.74E-178 | Epi-T  |
| LY6D           | 1.26E-180 | 1.003864 | 0.77  | 0.413 | 2.29E-176 | Epi-T  |
| RPL35A         | 1.63E-177 | 0.314706 | 1     | 0.998 | 2.96E-173 | Epi-T  |
| BTG1           | 2.88E-176 | 0.506623 | 0.995 | 0.95  | 5.25E-172 | Epi-T  |

|         |           |          |       |       |           |       |
|---------|-----------|----------|-------|-------|-----------|-------|
| MT1X    | 6.40E-176 | 0.58486  | 1     | 0.975 | 1.17E-171 | Epi-T |
| RPL27A  | 6.78E-172 | 0.344214 | 0.998 | 0.998 | 1.23E-167 | Epi-T |
| RPL15   | 8.14E-172 | 0.287259 | 0.999 | 0.998 | 1.48E-167 | Epi-T |
| RPL36A  | 2.37E-170 | 0.422248 | 0.994 | 0.989 | 4.31E-166 | Epi-T |
| ARL4A   | 5.40E-169 | 0.560809 | 0.901 | 0.596 | 9.83E-165 | Epi-T |
| RPL13A  | 2.80E-161 | 0.359479 | 1     | 0.999 | 5.10E-157 | Epi-T |
| CFD     | 5.41E-161 | 0.645025 | 0.704 | 0.336 | 9.84E-157 | Epi-T |
| RPS8    | 2.57E-159 | 0.387591 | 0.998 | 0.999 | 4.67E-155 | Epi-T |
| RPS7    | 1.99E-157 | 0.34595  | 1     | 0.993 | 3.63E-153 | Epi-T |
| DEFB1   | 1.49E-156 | 0.632673 | 0.742 | 0.378 | 2.71E-152 | Epi-T |
| RPS4X   | 1.98E-155 | 0.38913  | 1     | 0.999 | 3.60E-151 | Epi-T |
| RPS25   | 1.08E-154 | 0.291722 | 0.999 | 0.998 | 1.97E-150 | Epi-T |
| RPL31   | 3.11E-154 | 0.338174 | 0.999 | 0.998 | 5.66E-150 | Epi-T |
| RPL23A  | 5.47E-153 | 0.301222 | 0.999 | 0.998 | 9.97E-149 | Epi-T |
| RPL3    | 8.05E-153 | 0.345265 | 0.999 | 0.999 | 1.47E-148 | Epi-T |
| RPS9    | 3.83E-151 | 0.334901 | 0.998 | 0.998 | 6.97E-147 | Epi-T |
| RPS10   | 1.11E-147 | 0.414551 | 0.988 | 0.978 | 2.01E-143 | Epi-T |
| SLPI    | 1.96E-147 | 0.514974 | 0.818 | 0.434 | 3.57E-143 | Epi-T |
| B2M     | 3.78E-147 | 0.418873 | 1     | 0.997 | 6.89E-143 | Epi-T |
| LGALS7B | 1.65E-146 | 0.568864 | 0.64  | 0.299 | 3.00E-142 | Epi-T |
| RPL5    | 5.39E-145 | 0.363858 | 0.997 | 0.993 | 9.82E-141 | Epi-T |
| RPL37A  | 5.14E-144 | 0.336793 | 0.998 | 0.998 | 9.35E-140 | Epi-T |
| RPS29   | 7.88E-143 | 0.337917 | 0.995 | 0.996 | 1.44E-138 | Epi-T |
| S100A16 | 8.97E-143 | 0.58301  | 0.902 | 0.709 | 1.63E-138 | Epi-T |
| MSS51   | 1.01E-141 | 0.381979 | 0.991 | 0.978 | 1.84E-137 | Epi-T |
| RPL30   | 7.32E-141 | 0.325678 | 0.999 | 0.998 | 1.33E-136 | Epi-T |
| RPS17L  | 1.27E-140 | 0.335957 | 0.996 | 0.996 | 2.32E-136 | Epi-T |
| RPL19   | 6.47E-139 | 0.296679 | 1     | 0.998 | 1.18E-134 | Epi-T |
| RPS14P3 | 1.30E-136 | 0.383411 | 0.984 | 0.96  | 2.37E-132 | Epi-T |
| NACA    | 2.78E-136 | 0.297852 | 0.999 | 0.996 | 5.07E-132 | Epi-T |
| KRT14   | 5.31E-133 | 1.061753 | 0.834 | 0.562 | 9.66E-129 | Epi-T |
| RPL14   | 1.57E-131 | 0.307195 | 0.998 | 0.995 | 2.86E-127 | Epi-T |
| PTN     | 7.43E-130 | 0.435235 | 0.298 | 0.08  | 1.35E-125 | Epi-T |
| RPS24   | 3.30E-128 | 0.322268 | 0.998 | 0.998 | 6.01E-124 | Epi-T |
| RPL28   | 4.45E-127 | 0.375567 | 0.998 | 0.992 | 8.10E-123 | Epi-T |
| EEF1G   | 1.54E-126 | 0.347449 | 0.995 | 0.988 | 2.80E-122 | Epi-T |
| RPL37   | 6.98E-125 | 0.347675 | 0.996 | 0.995 | 1.27E-120 | Epi-T |
| LGALS7  | 1.06E-124 | 0.490982 | 0.614 | 0.304 | 1.93E-120 | Epi-T |
| RPL18   | 5.41E-123 | 0.316864 | 0.998 | 0.996 | 9.84E-119 | Epi-T |
| CLEC2B  | 2.18E-122 | 0.514903 | 0.885 | 0.624 | 3.97E-118 | Epi-T |
| RPS20   | 2.66E-119 | 0.287736 | 0.996 | 0.997 | 4.84E-115 | Epi-T |
| RPS3    | 1.00E-117 | 0.321536 | 0.996 | 0.996 | 1.83E-113 | Epi-T |
| HLA-B   | 1.43E-117 | 0.475572 | 0.985 | 0.921 | 2.60E-113 | Epi-T |
| GAS5    | 4.97E-117 | 0.418932 | 0.981 | 0.931 | 9.05E-113 | Epi-T |
| RPL17   | 1.04E-116 | 0.360363 | 0.988 | 0.985 | 1.90E-112 | Epi-T |
| RPS12   | 9.93E-116 | 0.359366 | 0.998 | 0.999 | 1.81E-111 | Epi-T |
| RPL7    | 1.30E-114 | 0.300045 | 0.998 | 0.999 | 2.36E-110 | Epi-T |
| RPS21   | 7.57E-114 | 0.308008 | 0.995 | 0.989 | 1.38E-109 | Epi-T |

|              |           |          |       |       |           |       |
|--------------|-----------|----------|-------|-------|-----------|-------|
| RPL27        | 1.52E-108 | 0.27271  | 0.998 | 0.994 | 2.77E-104 | Epi-T |
| CSRP2        | 1.59E-103 | 0.463047 | 0.993 | 0.874 | 2.89E-99  | Epi-T |
| DEGS1        | 1.74E-100 | 0.475418 | 0.636 | 0.361 | 3.16E-96  | Epi-T |
| MGST1        | 3.42E-100 | 0.607614 | 0.498 | 0.239 | 6.23E-96  | Epi-T |
| RPS23        | 2.23E-99  | 0.256535 | 1     | 0.998 | 4.07E-95  | Epi-T |
| FABP5        | 6.28E-97  | 0.45159  | 0.997 | 0.941 | 1.14E-92  | Epi-T |
| RPLP2        | 3.55E-96  | 0.277335 | 1     | 0.999 | 6.46E-92  | Epi-T |
| RPL6         | 2.32E-95  | 0.295941 | 0.995 | 0.991 | 4.23E-91  | Epi-T |
| KRT13        | 2.95E-94  | 0.481467 | 0.854 | 0.639 | 5.37E-90  | Epi-T |
| RPL7A        | 2.08E-93  | 0.316903 | 0.997 | 0.987 | 3.79E-89  | Epi-T |
| GPX2         | 1.89E-91  | 0.476009 | 0.63  | 0.37  | 3.43E-87  | Epi-T |
| RPL4         | 3.65E-90  | 0.291869 | 0.992 | 0.986 | 6.64E-86  | Epi-T |
| HLA-C        | 9.46E-89  | 0.361577 | 0.987 | 0.954 | 1.72E-84  | Epi-T |
| FOXP1        | 6.84E-86  | 0.290043 | 0.974 | 0.943 | 1.25E-81  | Epi-T |
| PSAT1        | 4.55E-85  | 0.440507 | 0.776 | 0.546 | 8.28E-81  | Epi-T |
| RPS11        | 5.24E-85  | 0.298436 | 0.997 | 0.984 | 9.54E-81  | Epi-T |
| BAG1         | 6.65E-85  | 0.304736 | 0.987 | 0.899 | 1.21E-80  | Epi-T |
| L32131       | 1.54E-84  | 0.383563 | 0.872 | 0.736 | 2.80E-80  | Epi-T |
| IGFBP3       | 2.32E-84  | 0.488569 | 0.437 | 0.192 | 4.22E-80  | Epi-T |
| RPL23        | 5.84E-83  | 0.267787 | 0.994 | 0.984 | 1.06E-78  | Epi-T |
| RPS5         | 1.91E-82  | 0.276419 | 0.995 | 0.989 | 3.48E-78  | Epi-T |
| PCP4L1       | 5.15E-82  | 0.306499 | 0.475 | 0.231 | 9.37E-78  | Epi-T |
| HIST2H2AA4   | 4.64E-81  | 0.286156 | 0.91  | 0.705 | 8.45E-77  | Epi-T |
| GAPDH        | 1.66E-78  | 0.279475 | 1     | 0.998 | 3.03E-74  | Epi-T |
| ALDH2        | 2.57E-78  | 0.317988 | 0.627 | 0.366 | 4.68E-74  | Epi-T |
| KRT5         | 8.55E-78  | 0.373143 | 1     | 0.874 | 1.56E-73  | Epi-T |
| IMPA2        | 3.42E-77  | 0.294254 | 0.509 | 0.27  | 6.22E-73  | Epi-T |
| RPLP0        | 9.88E-77  | 0.317748 | 0.998 | 0.992 | 1.80E-72  | Epi-T |
| PABPC1       | 2.01E-74  | 0.356252 | 0.964 | 0.898 | 3.66E-70  | Epi-T |
| RPS16        | 3.98E-74  | 0.259011 | 0.997 | 0.994 | 7.26E-70  | Epi-T |
| EVA1A        | 1.47E-70  | 0.255356 | 0.392 | 0.184 | 2.68E-66  | Epi-T |
| DBI          | 2.25E-68  | 0.319183 | 0.971 | 0.917 | 4.10E-64  | Epi-T |
| GLTSCR2      | 4.08E-68  | 0.30403  | 0.914 | 0.822 | 7.44E-64  | Epi-T |
| TMSB4X       | 3.64E-65  | 0.273734 | 1     | 0.998 | 6.64E-61  | Epi-T |
| GNB2L1       | 1.08E-64  | 0.254934 | 0.991 | 0.99  | 1.96E-60  | Epi-T |
| MIF          | 4.89E-62  | 0.258739 | 0.996 | 0.993 | 8.91E-58  | Epi-T |
| MGST2        | 1.35E-60  | 0.288486 | 0.876 | 0.718 | 2.47E-56  | Epi-T |
| EPAS1        | 3.61E-59  | 0.30737  | 0.497 | 0.293 | 6.57E-55  | Epi-T |
| S100A2       | 4.87E-59  | 0.826011 | 0.629 | 0.416 | 8.87E-55  | Epi-T |
| TPT1         | 2.94E-58  | 0.256837 | 0.997 | 0.997 | 5.35E-54  | Epi-T |
| RHOV         | 5.47E-58  | 0.31621  | 0.872 | 0.626 | 9.96E-54  | Epi-T |
| NPM1         | 2.10E-55  | 0.268715 | 0.971 | 0.925 | 3.83E-51  | Epi-T |
| SLC2A1       | 1.11E-54  | 0.303864 | 0.942 | 0.854 | 2.02E-50  | Epi-T |
| VAV3         | 1.44E-53  | 0.286727 | 0.623 | 0.416 | 2.62E-49  | Epi-T |
| C17orf76-AS1 | 2.32E-53  | 0.296627 | 0.978 | 0.963 | 4.22E-49  | Epi-T |
| TMEM123      | 6.57E-51  | 0.30663  | 0.741 | 0.573 | 1.20E-46  | Epi-T |
| POLR1D       | 9.25E-51  | 0.253164 | 0.922 | 0.822 | 1.68E-46  | Epi-T |
| ADM          | 3.09E-49  | 0.320574 | 0.967 | 0.884 | 5.63E-45  | Epi-T |



|            |           |          |       |       |           |        |
|------------|-----------|----------|-------|-------|-----------|--------|
| SCGB2A1    | 5.40E-49  | 0.400859 | 0.655 | 0.432 | 9.84E-45  | Epi-T  |
| HLA-A      | 1.84E-47  | 0.298486 | 0.983 | 0.96  | 3.35E-43  | Epi-T  |
| MT1G       | 1.88E-46  | 0.531682 | 0.458 | 0.273 | 3.42E-42  | Epi-T  |
| TXN        | 1.75E-44  | 0.313808 | 0.987 | 0.981 | 3.19E-40  | Epi-T  |
| SNORA33    | 4.97E-44  | 0.266652 | 0.851 | 0.761 | 9.04E-40  | Epi-T  |
| CCND1      | 8.77E-42  | 0.338999 | 0.795 | 0.656 | 1.60E-37  | Epi-T  |
| CBR1       | 1.18E-39  | 0.303266 | 0.822 | 0.681 | 2.15E-35  | Epi-T  |
| TXNIP      | 4.69E-37  | 0.256707 | 0.803 | 0.667 | 8.53E-33  | Epi-T  |
| S100A14    | 5.19E-34  | 0.259086 | 0.938 | 0.768 | 9.46E-30  | Epi-T  |
| NEAT1      | 5.42E-30  | 0.277682 | 0.946 | 0.932 | 9.86E-26  | Epi-T  |
| SFN        | 1.46E-29  | 0.34585  | 0.995 | 0.868 | 2.65E-25  | Epi-T  |
| CRIP1      | 4.33E-19  | 0.394096 | 0.778 | 0.75  | 7.89E-15  | Epi-T  |
| MYC        | 1.59E-16  | 0.254205 | 0.656 | 0.56  | 2.90E-12  | Epi-T  |
| SPRR1B     | 0         | 1.796826 | 0.439 | 0.053 | 0         | Conj-2 |
| SPRR2A     | 0         | 1.684953 | 0.392 | 0.053 | 0         | Conj-2 |
| KRT13      | 0         | 1.648261 | 0.985 | 0.632 | 0         | Conj-2 |
| SPRR1A     | 0         | 1.58991  | 0.501 | 0.075 | 0         | Conj-2 |
| SLPI       | 0         | 1.491691 | 0.962 | 0.429 | 0         | Conj-2 |
| AQP5       | 0         | 1.335695 | 0.659 | 0.18  | 0         | Conj-2 |
| CXCL17     | 0         | 1.104292 | 0.885 | 0.375 | 0         | Conj-2 |
| S100A11    | 0         | 1.042838 | 1     | 0.985 | 0         | Conj-2 |
| FAM3B      | 0         | 0.787783 | 0.661 | 0.143 | 0         | Conj-2 |
| PITX1      | 0         | 0.619437 | 0.476 | 0.09  | 0         | Conj-2 |
| AQP3       | 5.07E-301 | 1.049623 | 0.994 | 0.647 | 9.22E-297 | Conj-2 |
| CSTA       | 8.31E-301 | 1.35931  | 0.984 | 0.75  | 1.51E-296 | Conj-2 |
| F3         | 6.90E-290 | 1.058783 | 0.701 | 0.22  | 1.26E-285 | Conj-2 |
| LCN2       | 5.79E-286 | 1.15106  | 0.655 | 0.195 | 1.05E-281 | Conj-2 |
| SERPINB2   | 1.93E-259 | 1.541231 | 0.453 | 0.097 | 3.51E-255 | Conj-2 |
| FAM3D      | 5.82E-255 | 0.663844 | 0.609 | 0.177 | 1.06E-250 | Conj-2 |
| FAM213A    | 5.82E-240 | 0.698542 | 0.781 | 0.317 | 1.06E-235 | Conj-2 |
| DEFB1      | 3.03E-238 | 0.906303 | 0.813 | 0.377 | 5.52E-234 | Conj-2 |
| S100A8     | 3.25E-232 | 2.364239 | 0.772 | 0.397 | 5.93E-228 | Conj-2 |
| S100A16    | 4.50E-230 | 0.808188 | 0.945 | 0.708 | 8.19E-226 | Conj-2 |
| APOBEC3A   | 1.53E-229 | 1.900504 | 0.724 | 0.322 | 2.78E-225 | Conj-2 |
| MDK        | 1.16E-225 | 0.667017 | 0.699 | 0.259 | 2.11E-221 | Conj-2 |
| BARX2      | 6.40E-222 | 0.452283 | 0.465 | 0.11  | 1.17E-217 | Conj-2 |
| BAALC      | 1.96E-219 | 0.521325 | 0.457 | 0.111 | 3.57E-215 | Conj-2 |
| IVL        | 2.13E-218 | 0.42342  | 0.32  | 0.055 | 3.88E-214 | Conj-2 |
| KLK11      | 7.50E-217 | 0.720902 | 0.743 | 0.331 | 1.37E-212 | Conj-2 |
| HSPB1      | 2.40E-213 | 0.620557 | 1     | 0.984 | 4.37E-209 | Conj-2 |
| TMSB4X     | 3.85E-213 | 0.52484  | 1     | 0.998 | 7.02E-209 | Conj-2 |
| HOPX       | 1.64E-211 | 0.85455  | 0.91  | 0.54  | 2.99E-207 | Conj-2 |
| S100A9     | 1.02E-208 | 1.88624  | 0.742 | 0.381 | 1.86E-204 | Conj-2 |
| HIST2H2AA4 | 1.36E-208 | 0.878399 | 0.957 | 0.704 | 2.47E-204 | Conj-2 |
| KRT6A      | 2.28E-204 | 1.483632 | 0.425 | 0.109 | 4.16E-200 | Conj-2 |
| RPL41      | 1.11E-190 | 0.334041 | 1     | 1     | 2.03E-186 | Conj-2 |
| POLR2J2    | 1.23E-189 | 0.746871 | 1     | 0.874 | 2.24E-185 | Conj-2 |
| KRT23      | 3.28E-189 | 0.582906 | 0.284 | 0.049 | 5.96E-185 | Conj-2 |

|           |           |          |       |       |           |        |
|-----------|-----------|----------|-------|-------|-----------|--------|
| POLR2J3   | 3.75E-189 | 0.77105  | 0.999 | 0.866 | 6.83E-185 | Conj-2 |
| PHLDA2    | 3.38E-188 | 0.831203 | 0.998 | 0.898 | 6.15E-184 | Conj-2 |
| B2M       | 3.84E-184 | 0.571309 | 0.999 | 0.997 | 6.99E-180 | Conj-2 |
| TMEM45B   | 7.59E-172 | 0.261003 | 0.307 | 0.061 | 1.38E-167 | Conj-2 |
| ISG20     | 4.47E-171 | 0.783585 | 0.451 | 0.139 | 8.14E-167 | Conj-2 |
| IL1RN     | 4.28E-165 | 1.060239 | 0.84  | 0.544 | 7.79E-161 | Conj-2 |
| HIST1H2AC | 6.14E-160 | 0.442196 | 0.513 | 0.164 | 1.12E-155 | Conj-2 |
| C19orf33  | 5.70E-159 | 0.562721 | 0.997 | 0.844 | 1.04E-154 | Conj-2 |
| SULT2B1   | 4.42E-158 | 0.596992 | 0.665 | 0.287 | 8.04E-154 | Conj-2 |
| HS3ST1    | 1.54E-156 | 0.697533 | 0.459 | 0.151 | 2.80E-152 | Conj-2 |
| PDZK1IP1  | 2.02E-152 | 0.335412 | 0.288 | 0.062 | 3.67E-148 | Conj-2 |
| EIF6      | 1.86E-151 | 0.531823 | 0.925 | 0.762 | 3.39E-147 | Conj-2 |
| AREG      | 2.97E-151 | 1.376118 | 0.762 | 0.425 | 5.41E-147 | Conj-2 |
| SCGB2A1   | 9.56E-149 | 0.913916 | 0.781 | 0.426 | 1.74E-144 | Conj-2 |
| SFN       | 3.48E-146 | 0.789475 | 1     | 0.869 | 6.33E-142 | Conj-2 |
| TMSB10    | 4.60E-145 | 0.43795  | 0.999 | 0.997 | 8.38E-141 | Conj-2 |
| SAT1      | 5.46E-144 | 0.599987 | 0.999 | 0.99  | 9.94E-140 | Conj-2 |
| RPS29     | 5.27E-143 | 0.386363 | 0.999 | 0.996 | 9.60E-139 | Conj-2 |
| RHCG      | 1.05E-142 | 0.667088 | 0.31  | 0.074 | 1.92E-138 | Conj-2 |
| TMEM40    | 1.05E-141 | 0.493629 | 0.667 | 0.319 | 1.92E-137 | Conj-2 |
| HIST1H2BK | 1.19E-141 | 0.418774 | 0.485 | 0.165 | 2.16E-137 | Conj-2 |
| KRT4      | 1.17E-140 | 1.144315 | 0.505 | 0.182 | 2.14E-136 | Conj-2 |
| RPS18     | 3.92E-139 | 0.366238 | 1     | 1     | 7.13E-135 | Conj-2 |
| CFD       | 1.23E-138 | 0.618997 | 0.706 | 0.339 | 2.25E-134 | Conj-2 |
| LOC645638 | 3.96E-138 | 0.877372 | 0.511 | 0.187 | 7.20E-134 | Conj-2 |
| MYL6      | 6.12E-138 | 0.386593 | 0.999 | 0.987 | 1.11E-133 | Conj-2 |
| CDKN2B    | 1.20E-137 | 0.568566 | 0.595 | 0.264 | 2.18E-133 | Conj-2 |
| TXN       | 5.67E-136 | 0.742685 | 0.999 | 0.98  | 1.03E-131 | Conj-2 |
| RAC1      | 1.18E-134 | 0.405459 | 0.967 | 0.954 | 2.15E-130 | Conj-2 |
| BAG1      | 1.13E-133 | 0.515906 | 0.968 | 0.901 | 2.06E-129 | Conj-2 |
| FABP5     | 6.92E-130 | 0.616748 | 0.999 | 0.941 | 1.26E-125 | Conj-2 |
| FXYD3     | 1.18E-124 | 0.436997 | 0.999 | 0.857 | 2.14E-120 | Conj-2 |
| CLIC1     | 1.54E-123 | 0.443943 | 0.956 | 0.911 | 2.81E-119 | Conj-2 |
| CDKN2A    | 2.19E-122 | 0.3334   | 0.253 | 0.058 | 3.99E-118 | Conj-2 |
| PRSS22    | 1.82E-117 | 0.394542 | 0.441 | 0.159 | 3.31E-113 | Conj-2 |
| BTG1      | 3.15E-117 | 0.665266 | 0.971 | 0.952 | 5.74E-113 | Conj-2 |
| DBI       | 5.38E-117 | 0.560089 | 0.944 | 0.919 | 9.79E-113 | Conj-2 |
| SMIM5     | 8.02E-117 | 0.591302 | 0.586 | 0.257 | 1.46E-112 | Conj-2 |
| S100A14   | 8.21E-115 | 0.619632 | 0.965 | 0.767 | 1.49E-110 | Conj-2 |
| MUC20     | 2.87E-114 | 0.458317 | 0.695 | 0.351 | 5.22E-110 | Conj-2 |
| RPS28     | 7.81E-113 | 0.305487 | 1     | 0.999 | 1.42E-108 | Conj-2 |
| TACSTD2   | 1.84E-112 | 0.534851 | 1     | 0.896 | 3.36E-108 | Conj-2 |
| HIST1H2BC | 2.65E-111 | 0.456043 | 0.379 | 0.123 | 4.83E-107 | Conj-2 |
| RPS14     | 1.32E-109 | 0.263647 | 0.999 | 1     | 2.40E-105 | Conj-2 |
| BCAS1     | 2.22E-109 | 0.26906  | 0.329 | 0.097 | 4.05E-105 | Conj-2 |
| RPL36     | 9.39E-108 | 0.317401 | 0.996 | 0.998 | 1.71E-103 | Conj-2 |
| RPL10     | 2.07E-107 | 0.257041 | 1     | 1     | 3.77E-103 | Conj-2 |
| LYPD3     | 2.49E-107 | 0.492206 | 0.992 | 0.837 | 4.53E-103 | Conj-2 |

|           |           |          |       |       |           |        |
|-----------|-----------|----------|-------|-------|-----------|--------|
| CLDN4     | 6.55E-105 | 0.611549 | 0.911 | 0.603 | 1.19E-100 | Conj-2 |
| NUPR1     | 7.22E-105 | 0.606875 | 0.895 | 0.677 | 1.32E-100 | Conj-2 |
| FGFBP1    | 9.73E-105 | 0.86015  | 0.688 | 0.42  | 1.77E-100 | Conj-2 |
| PLAUR     | 2.06E-103 | 1.247657 | 0.527 | 0.275 | 3.74E-99  | Conj-2 |
| OSR2      | 1.66E-102 | 0.325335 | 0.578 | 0.24  | 3.03E-98  | Conj-2 |
| CSTB      | 2.67E-102 | 0.84831  | 0.978 | 0.936 | 4.85E-98  | Conj-2 |
| EHF       | 7.03E-102 | 0.668376 | 0.603 | 0.319 | 1.28E-97  | Conj-2 |
| HIST1H2BD | 1.53E-101 | 0.344546 | 0.405 | 0.145 | 2.79E-97  | Conj-2 |
| MUC21     | 2.20E-101 | 0.522551 | 0.373 | 0.131 | 4.00E-97  | Conj-2 |
| LGALS3    | 8.15E-101 | 0.394834 | 0.999 | 0.988 | 1.48E-96  | Conj-2 |
| C9orf16   | 1.84E-99  | 0.40193  | 0.947 | 0.854 | 3.35E-95  | Conj-2 |
| CD55      | 1.07E-97  | 0.630197 | 0.768 | 0.554 | 1.94E-93  | Conj-2 |
| HES4      | 2.62E-97  | 0.519763 | 0.68  | 0.382 | 4.77E-93  | Conj-2 |
| COX7A1    | 7.67E-96  | 0.591908 | 0.744 | 0.467 | 1.40E-91  | Conj-2 |
| RPL35     | 1.24E-93  | 0.258972 | 1     | 0.998 | 2.26E-89  | Conj-2 |
| RPL39     | 2.56E-93  | 0.278477 | 1     | 0.998 | 4.66E-89  | Conj-2 |
| ELF3      | 2.63E-91  | 0.50861  | 0.98  | 0.8   | 4.79E-87  | Conj-2 |
| EVA1A     | 4.61E-91  | 0.326311 | 0.441 | 0.183 | 8.40E-87  | Conj-2 |
| RPL27A    | 3.14E-90  | 0.279209 | 0.999 | 0.998 | 5.72E-86  | Conj-2 |
| ABRACL    | 3.54E-89  | 0.414186 | 0.669 | 0.391 | 6.44E-85  | Conj-2 |
| ZNF593    | 6.10E-89  | 0.470812 | 0.587 | 0.318 | 1.11E-84  | Conj-2 |
| CLEC2B    | 1.68E-88  | 0.486696 | 0.868 | 0.628 | 3.05E-84  | Conj-2 |
| THRB      | 3.89E-87  | 0.544696 | 0.778 | 0.573 | 7.08E-83  | Conj-2 |
| CTSS      | 1.00E-86  | 0.307207 | 0.498 | 0.22  | 1.83E-82  | Conj-2 |
| PRDX6     | 2.45E-86  | 0.489136 | 0.906 | 0.852 | 4.45E-82  | Conj-2 |
| GSTP1     | 3.28E-86  | 0.293775 | 1     | 0.996 | 5.98E-82  | Conj-2 |
| IGFBP3    | 6.93E-86  | 0.707693 | 0.443 | 0.194 | 1.26E-81  | Conj-2 |
| CALML3    | 1.23E-84  | 0.566473 | 0.897 | 0.69  | 2.24E-80  | Conj-2 |
| MARCKSL1  | 1.50E-84  | 0.568842 | 0.492 | 0.234 | 2.74E-80  | Conj-2 |
| CDKN1A    | 2.09E-84  | 0.482502 | 0.852 | 0.683 | 3.81E-80  | Conj-2 |
| CD68      | 2.65E-84  | 0.250582 | 0.254 | 0.075 | 4.83E-80  | Conj-2 |
| ARPC3     | 1.36E-83  | 0.340892 | 0.922 | 0.879 | 2.47E-79  | Conj-2 |
| FOSL1     | 3.11E-83  | 0.720485 | 0.549 | 0.303 | 5.67E-79  | Conj-2 |
| MGST1     | 8.92E-83  | 0.462349 | 0.507 | 0.241 | 1.62E-78  | Conj-2 |
| CD9       | 9.42E-83  | 0.3166   | 0.988 | 0.992 | 1.72E-78  | Conj-2 |
| LSP1      | 5.57E-82  | 0.388461 | 0.616 | 0.312 | 1.01E-77  | Conj-2 |
| H2AFJ     | 3.34E-81  | 0.410848 | 0.767 | 0.541 | 6.08E-77  | Conj-2 |
| SERPINB1  | 4.27E-81  | 0.739567 | 0.745 | 0.593 | 7.78E-77  | Conj-2 |
| SLC9A3R1  | 4.73E-81  | 0.383747 | 0.727 | 0.487 | 8.61E-77  | Conj-2 |
| RPL12     | 1.54E-79  | 0.267976 | 0.998 | 0.998 | 2.81E-75  | Conj-2 |
| ATP6V1G1  | 1.63E-78  | 0.302722 | 0.967 | 0.965 | 2.97E-74  | Conj-2 |
| RPS15A    | 2.79E-78  | 0.281106 | 1     | 0.997 | 5.08E-74  | Conj-2 |
| RPS14P3   | 7.55E-78  | 0.303301 | 0.988 | 0.96  | 1.37E-73  | Conj-2 |
| KRT17     | 1.93E-77  | 1.06818  | 0.65  | 0.408 | 3.51E-73  | Conj-2 |
| PCP4L1    | 6.99E-77  | 0.321467 | 0.492 | 0.232 | 1.27E-72  | Conj-2 |
| BID       | 1.08E-75  | 0.355016 | 0.53  | 0.274 | 1.97E-71  | Conj-2 |
| SH3BGRL3  | 1.69E-75  | 0.484698 | 0.994 | 0.95  | 3.07E-71  | Conj-2 |
| A4GALT    | 6.59E-75  | 0.402322 | 0.762 | 0.515 | 1.20E-70  | Conj-2 |

|           |          |          |       |       |          |        |
|-----------|----------|----------|-------|-------|----------|--------|
| GNA15     | 7.51E-75 | 0.292247 | 0.501 | 0.247 | 1.37E-70 | Conj-2 |
| RPL29     | 1.82E-74 | 0.264783 | 0.998 | 0.992 | 3.31E-70 | Conj-2 |
| HIST2H2BE | 4.95E-74 | 0.363162 | 0.501 | 0.244 | 9.01E-70 | Conj-2 |
| LINC00673 | 1.66E-72 | 0.268282 | 0.373 | 0.153 | 3.03E-68 | Conj-2 |
| EZR       | 2.10E-71 | 0.446299 | 0.942 | 0.839 | 3.83E-67 | Conj-2 |
| RARRES3   | 7.33E-71 | 0.47828  | 0.638 | 0.4   | 1.33E-66 | Conj-2 |
| ZNF385A   | 2.30E-70 | 0.326039 | 0.691 | 0.441 | 4.19E-66 | Conj-2 |
| UNC5B-AS1 | 1.23E-69 | 0.58234  | 0.541 | 0.306 | 2.23E-65 | Conj-2 |
| RAB25     | 1.70E-69 | 0.360847 | 0.789 | 0.574 | 3.09E-65 | Conj-2 |
| TMA7      | 1.88E-69 | 0.279312 | 0.988 | 0.978 | 3.43E-65 | Conj-2 |
| DSG3      | 4.28E-69 | 0.286579 | 0.391 | 0.171 | 7.79E-65 | Conj-2 |
| DEGS2     | 1.02E-68 | 0.25175  | 0.262 | 0.089 | 1.86E-64 | Conj-2 |
| COX8A     | 2.44E-67 | 0.318249 | 0.927 | 0.845 | 4.45E-63 | Conj-2 |
| RPL36A    | 3.71E-67 | 0.303007 | 0.995 | 0.989 | 6.76E-63 | Conj-2 |
| RPL24     | 1.55E-66 | 0.285392 | 0.999 | 0.993 | 2.82E-62 | Conj-2 |
| RAB11FIP1 | 6.90E-66 | 0.314116 | 0.322 | 0.13  | 1.26E-61 | Conj-2 |
| KLF5      | 8.83E-66 | 0.350531 | 0.882 | 0.674 | 1.61E-61 | Conj-2 |
| PPDPF     | 1.00E-65 | 0.303143 | 0.993 | 0.966 | 1.82E-61 | Conj-2 |
| CYB5A     | 3.31E-65 | 0.414087 | 0.684 | 0.487 | 6.03E-61 | Conj-2 |
| TGM1      | 4.25E-65 | 0.28887  | 0.344 | 0.146 | 7.73E-61 | Conj-2 |
| GUK1      | 4.26E-65 | 0.308191 | 0.928 | 0.898 | 7.76E-61 | Conj-2 |
| PFN1      | 4.97E-61 | 0.263904 | 0.995 | 0.985 | 9.04E-57 | Conj-2 |
| RRAD      | 8.51E-61 | 0.380124 | 0.305 | 0.123 | 1.55E-56 | Conj-2 |
| BIK       | 1.29E-60 | 0.374872 | 0.526 | 0.307 | 2.34E-56 | Conj-2 |
| HEBP2     | 2.08E-60 | 0.36499  | 0.763 | 0.604 | 3.79E-56 | Conj-2 |
| CAST      | 2.24E-60 | 0.337061 | 0.871 | 0.788 | 4.08E-56 | Conj-2 |
| EHBP1     | 3.15E-60 | 0.270136 | 0.425 | 0.207 | 5.74E-56 | Conj-2 |
| CLINT1    | 1.05E-59 | 0.312817 | 0.67  | 0.421 | 1.91E-55 | Conj-2 |
| SERINC2   | 4.26E-59 | 0.358301 | 0.747 | 0.543 | 7.75E-55 | Conj-2 |
| LRRC8A    | 1.66E-57 | 0.28313  | 0.37  | 0.174 | 3.03E-53 | Conj-2 |
| ANXA1     | 3.01E-57 | 0.56778  | 0.996 | 0.983 | 5.48E-53 | Conj-2 |
| MALL      | 1.00E-56 | 0.352823 | 0.849 | 0.715 | 1.83E-52 | Conj-2 |
| MGST2     | 2.23E-56 | 0.347816 | 0.868 | 0.72  | 4.06E-52 | Conj-2 |
| SELK      | 5.74E-55 | 0.426533 | 0.916 | 0.858 | 1.05E-50 | Conj-2 |
| CHMP4B    | 7.46E-55 | 0.309641 | 0.87  | 0.76  | 1.36E-50 | Conj-2 |
| TPM4      | 8.77E-55 | 0.399149 | 0.666 | 0.482 | 1.60E-50 | Conj-2 |
| CCDC12    | 3.58E-53 | 0.374982 | 0.769 | 0.603 | 6.53E-49 | Conj-2 |
| DNAJB1    | 4.85E-53 | 0.285567 | 0.963 | 0.909 | 8.83E-49 | Conj-2 |
| RHOV      | 6.03E-53 | 0.288354 | 0.928 | 0.624 | 1.10E-48 | Conj-2 |
| LMO4      | 6.09E-53 | 0.360874 | 0.737 | 0.567 | 1.11E-48 | Conj-2 |
| ATP6V1F   | 7.11E-53 | 0.261141 | 0.959 | 0.89  | 1.29E-48 | Conj-2 |
| UQCRCQ    | 1.75E-52 | 0.254522 | 0.971 | 0.949 | 3.18E-48 | Conj-2 |
| CRIP1     | 1.92E-52 | 1.000894 | 0.823 | 0.748 | 3.50E-48 | Conj-2 |
| HIST1H1C  | 8.48E-52 | 0.376581 | 0.416 | 0.213 | 1.54E-47 | Conj-2 |
| SMAGP     | 2.05E-50 | 0.297119 | 0.584 | 0.372 | 3.73E-46 | Conj-2 |
| TM4SF1    | 5.18E-50 | 0.977043 | 0.757 | 0.682 | 9.43E-46 | Conj-2 |
| SEPW1     | 5.47E-50 | 0.31185  | 0.594 | 0.38  | 9.95E-46 | Conj-2 |
| ZFAS1     | 5.60E-50 | 0.285717 | 0.922 | 0.863 | 1.02E-45 | Conj-2 |

|          |          |          |       |       |          |        |
|----------|----------|----------|-------|-------|----------|--------|
| CAPNS2   | 1.13E-49 | 0.355851 | 0.746 | 0.582 | 2.05E-45 | Conj-2 |
| KRT8     | 2.87E-48 | 0.341826 | 0.605 | 0.384 | 5.23E-44 | Conj-2 |
| RPS26    | 4.02E-47 | 0.268888 | 0.962 | 0.942 | 7.32E-43 | Conj-2 |
| PERP     | 2.52E-46 | 0.280215 | 1     | 0.916 | 4.59E-42 | Conj-2 |
| C9orf169 | 5.06E-46 | 0.405935 | 0.298 | 0.137 | 9.21E-42 | Conj-2 |
| GPR87    | 1.05E-45 | 0.259181 | 0.518 | 0.307 | 1.91E-41 | Conj-2 |
| CHMP1B   | 2.38E-45 | 0.35649  | 0.838 | 0.735 | 4.33E-41 | Conj-2 |
| MAP3K8   | 6.24E-45 | 0.36124  | 0.44  | 0.255 | 1.14E-40 | Conj-2 |
| SERP1    | 1.95E-44 | 0.290099 | 0.896 | 0.831 | 3.55E-40 | Conj-2 |
| CRB3     | 2.82E-44 | 0.27734  | 0.426 | 0.236 | 5.14E-40 | Conj-2 |
| ST14     | 7.06E-44 | 0.252045 | 0.359 | 0.184 | 1.28E-39 | Conj-2 |
| SYT8     | 8.19E-44 | 0.314976 | 0.939 | 0.749 | 1.49E-39 | Conj-2 |
| IRF2BP2  | 1.25E-43 | 0.313031 | 0.543 | 0.342 | 2.28E-39 | Conj-2 |
| UAP1     | 7.88E-43 | 0.303799 | 0.546 | 0.349 | 1.43E-38 | Conj-2 |
| ETS2     | 2.36E-42 | 0.268844 | 0.553 | 0.346 | 4.30E-38 | Conj-2 |
| ZFP36L1  | 3.08E-42 | 0.32912  | 0.914 | 0.843 | 5.60E-38 | Conj-2 |
| POLR1D   | 6.21E-42 | 0.261444 | 0.907 | 0.824 | 1.13E-37 | Conj-2 |
| NUAK2    | 2.88E-41 | 0.413064 | 0.601 | 0.407 | 5.25E-37 | Conj-2 |
| HBEGF    | 5.90E-41 | 0.290325 | 0.496 | 0.306 | 1.07E-36 | Conj-2 |
| SOX15    | 6.86E-40 | 0.273561 | 0.901 | 0.772 | 1.25E-35 | Conj-2 |
| SRA1     | 1.07E-39 | 0.370065 | 0.639 | 0.483 | 1.95E-35 | Conj-2 |
| TXNDC17  | 2.07E-39 | 0.262721 | 0.869 | 0.792 | 3.77E-35 | Conj-2 |
| TUBB2A   | 3.23E-39 | 0.324533 | 0.851 | 0.762 | 5.88E-35 | Conj-2 |
| ARHGDI8  | 3.75E-39 | 0.267194 | 0.626 | 0.427 | 6.83E-35 | Conj-2 |
| CYBA     | 3.95E-39 | 0.310301 | 0.703 | 0.545 | 7.18E-35 | Conj-2 |
| NDRG2    | 2.24E-38 | 0.266728 | 0.537 | 0.347 | 4.08E-34 | Conj-2 |
| LYPD2    | 4.22E-38 | 0.583204 | 0.279 | 0.134 | 7.68E-34 | Conj-2 |
| CLIC3    | 1.42E-37 | 0.304367 | 0.346 | 0.186 | 2.58E-33 | Conj-2 |
| C11orf31 | 4.29E-37 | 0.263628 | 0.867 | 0.782 | 7.81E-33 | Conj-2 |
| NOTCH2NL | 4.59E-37 | 0.276925 | 0.702 | 0.547 | 8.36E-33 | Conj-2 |
| DDIT4    | 1.08E-36 | 0.309928 | 0.643 | 0.452 | 1.96E-32 | Conj-2 |
| TNNT3    | 1.17E-36 | 0.283877 | 0.628 | 0.445 | 2.13E-32 | Conj-2 |
| ST3GAL4  | 1.02E-35 | 0.2607   | 0.506 | 0.325 | 1.86E-31 | Conj-2 |
| PLAU     | 1.39E-35 | 0.628505 | 0.615 | 0.49  | 2.52E-31 | Conj-2 |
| PMAIP1   | 1.50E-35 | 0.336535 | 0.84  | 0.697 | 2.74E-31 | Conj-2 |
| MAP2K3   | 1.60E-35 | 0.274278 | 0.621 | 0.449 | 2.91E-31 | Conj-2 |
| H19      | 3.38E-35 | 0.254011 | 0.269 | 0.131 | 6.15E-31 | Conj-2 |
| MIDN     | 6.69E-35 | 0.320611 | 0.654 | 0.485 | 1.22E-30 | Conj-2 |
| PDLIM5   | 1.34E-34 | 0.318867 | 0.443 | 0.285 | 2.44E-30 | Conj-2 |
| BCL10    | 2.83E-34 | 0.271371 | 0.395 | 0.234 | 5.15E-30 | Conj-2 |
| KRT10    | 3.12E-34 | 0.460016 | 0.955 | 0.927 | 5.68E-30 | Conj-2 |
| CKB      | 1.48E-33 | 0.255229 | 0.522 | 0.345 | 2.70E-29 | Conj-2 |
| EPHA2    | 2.00E-32 | 0.319927 | 0.459 | 0.297 | 3.64E-28 | Conj-2 |
| FAM46B   | 2.40E-31 | 0.268951 | 0.526 | 0.357 | 4.36E-27 | Conj-2 |
| HMGA1    | 1.13E-30 | 0.425344 | 0.563 | 0.426 | 2.06E-26 | Conj-2 |
| OVOL1    | 3.15E-30 | 0.289659 | 0.532 | 0.354 | 5.73E-26 | Conj-2 |
| GLTP     | 3.33E-30 | 0.300852 | 0.659 | 0.513 | 6.07E-26 | Conj-2 |
| CYSTM1   | 2.92E-29 | 0.360072 | 0.585 | 0.457 | 5.32E-25 | Conj-2 |

|           |           |          |       |       |           |        |
|-----------|-----------|----------|-------|-------|-----------|--------|
| PRELID1   | 5.59E-27  | 0.321462 | 0.815 | 0.775 | 1.02E-22  | Conj-2 |
| ARL4A     | 1.17E-26  | 0.337535 | 0.725 | 0.61  | 2.13E-22  | Conj-2 |
| USP53     | 1.56E-25  | 0.283268 | 0.286 | 0.169 | 2.84E-21  | Conj-2 |
| CD24      | 9.78E-25  | 0.5396   | 0.316 | 0.198 | 1.78E-20  | Conj-2 |
| IFI27     | 3.55E-24  | 0.424647 | 0.649 | 0.523 | 6.47E-20  | Conj-2 |
| MSLN      | 6.40E-24  | 0.261222 | 0.385 | 0.25  | 1.16E-19  | Conj-2 |
| TRIM16    | 2.31E-23  | 0.251626 | 0.541 | 0.408 | 4.21E-19  | Conj-2 |
| CFLAR     | 7.10E-23  | 0.285465 | 0.414 | 0.293 | 1.29E-18  | Conj-2 |
| PFDN2     | 1.66E-22  | 0.27551  | 0.866 | 0.817 | 3.02E-18  | Conj-2 |
| GADD45A   | 1.55E-20  | 0.482058 | 0.666 | 0.598 | 2.83E-16  | Conj-2 |
| TXNIP     | 3.20E-18  | 0.30977  | 0.729 | 0.673 | 5.83E-14  | Conj-2 |
| LY6D      | 9.95E-18  | 0.423783 | 0.538 | 0.431 | 1.81E-13  | Conj-2 |
| RAP2B     | 2.39E-16  | 0.337631 | 0.5   | 0.399 | 4.35E-12  | Conj-2 |
| TNFRSF12A | 1.99E-14  | 0.262372 | 0.47  | 0.381 | 3.63E-10  | Conj-2 |
| CLDN1     | 1.76E-13  | 0.485315 | 0.624 | 0.573 | 3.21E-09  | Conj-2 |
| HES1      | 5.56E-13  | 0.282231 | 0.813 | 0.755 | 1.01E-08  | Conj-2 |
| KRT24     | 2.82E-07  | 0.452764 | 0.33  | 0.262 | 0.005133  | Conj-2 |
| MT1G      | 2.96E-05  | 0.275192 | 0.336 | 0.282 | 0.539412  | Conj-2 |
| KRT24     | 0         | 2.916824 | 0.944 | 0.227 | 0         | Epi-S3 |
| LYPD2     | 0         | 1.863657 | 0.87  | 0.101 | 0         | Epi-S3 |
| LOC645638 | 0         | 1.847968 | 0.802 | 0.172 | 0         | Epi-S3 |
| PSCA      | 0         | 1.541166 | 0.743 | 0.163 | 0         | Epi-S3 |
| MAL       | 0         | 1.280111 | 0.991 | 0.437 | 0         | Epi-S3 |
| MSMB      | 0         | 1.238666 | 0.564 | 0.111 | 0         | Epi-S3 |
| ADIRF     | 0         | 1.177503 | 1     | 0.985 | 0         | Epi-S3 |
| LYPD3     | 0         | 1.011797 | 1     | 0.838 | 0         | Epi-S3 |
| CLIC3     | 0         | 1.003253 | 0.783 | 0.162 | 0         | Epi-S3 |
| LGALS3    | 0         | 0.998977 | 1     | 0.988 | 0         | Epi-S3 |
| SULT2B1   | 0         | 0.977619 | 0.882 | 0.276 | 0         | Epi-S3 |
| ASPG      | 0         | 0.967246 | 0.592 | 0.045 | 0         | Epi-S3 |
| SMIM5     | 0         | 0.954378 | 0.897 | 0.241 | 0         | Epi-S3 |
| UPK1B     | 0         | 0.951006 | 0.994 | 0.714 | 0         | Epi-S3 |
| CLDN7     | 0         | 0.946088 | 0.998 | 0.602 | 0         | Epi-S3 |
| SLURP1    | 0         | 0.921053 | 0.764 | 0.215 | 0         | Epi-S3 |
| SCEL      | 0         | 0.892187 | 0.9   | 0.401 | 0         | Epi-S3 |
| FAM3D     | 0         | 0.846544 | 0.741 | 0.172 | 0         | Epi-S3 |
| MUC21     | 0         | 0.824903 | 0.654 | 0.117 | 0         | Epi-S3 |
| C9orf169  | 0         | 0.764162 | 0.6   | 0.12  | 0         | Epi-S3 |
| LGALS9C   | 0         | 0.665625 | 0.589 | 0.073 | 0         | Epi-S3 |
| EPS8L1    | 0         | 0.658543 | 0.676 | 0.175 | 0         | Epi-S3 |
| LIPH      | 0         | 0.531145 | 0.604 | 0.132 | 0         | Epi-S3 |
| CD36      | 0         | 0.520629 | 0.451 | 0.061 | 0         | Epi-S3 |
| MYEOV     | 0         | 0.458269 | 0.358 | 0.026 | 0         | Epi-S3 |
| GDPD3     | 0         | 0.295225 | 0.292 | 0.023 | 0         | Epi-S3 |
| RELL1     | 2.32E-305 | 0.897741 | 0.776 | 0.26  | 4.23E-301 | Epi-S3 |
| LAD1      | 7.22E-305 | 0.792771 | 0.932 | 0.448 | 1.32E-300 | Epi-S3 |
| C4orf19   | 6.86E-300 | 0.722644 | 0.797 | 0.283 | 1.25E-295 | Epi-S3 |
| TACSTD2   | 9.76E-300 | 0.766041 | 1     | 0.897 | 1.78E-295 | Epi-S3 |

|           |           |          |       |       |           |        |
|-----------|-----------|----------|-------|-------|-----------|--------|
| LOC729966 | 8.51E-298 | 0.763058 | 0.882 | 0.354 | 1.55E-293 | Epi-S3 |
| MAL2      | 1.58E-296 | 0.941333 | 0.946 | 0.478 | 2.88E-292 | Epi-S3 |
| GIPC1     | 1.73E-291 | 0.802396 | 0.982 | 0.688 | 3.16E-287 | Epi-S3 |
| CALM2     | 1.57E-290 | 0.707787 | 1     | 0.979 | 2.85E-286 | Epi-S3 |
| POLR2J2   | 1.70E-289 | 0.779499 | 1     | 0.875 | 3.10E-285 | Epi-S3 |
| PPDPF     | 3.71E-288 | 0.625825 | 1     | 0.966 | 6.75E-284 | Epi-S3 |
| SDC1      | 3.75E-287 | 0.686625 | 1     | 0.928 | 6.83E-283 | Epi-S3 |
| HM13      | 5.89E-286 | 0.819108 | 0.934 | 0.572 | 1.07E-281 | Epi-S3 |
| MUC16     | 6.50E-286 | 0.372665 | 0.374 | 0.054 | 1.18E-281 | Epi-S3 |
| GJB4      | 2.38E-285 | 0.882291 | 0.926 | 0.443 | 4.33E-281 | Epi-S3 |
| C4orf3    | 1.09E-275 | 0.662757 | 0.997 | 0.928 | 1.98E-271 | Epi-S3 |
| ADH7      | 1.21E-274 | 0.847758 | 0.983 | 0.607 | 2.20E-270 | Epi-S3 |
| APOBEC3A  | 3.05E-267 | 0.813192 | 0.855 | 0.317 | 5.56E-263 | Epi-S3 |
| PRDX5     | 3.20E-267 | 0.571486 | 1     | 0.975 | 5.83E-263 | Epi-S3 |
| CD24      | 9.35E-267 | 0.777802 | 0.638 | 0.181 | 1.70E-262 | Epi-S3 |
| MUC20     | 2.67E-265 | 0.690756 | 0.855 | 0.344 | 4.86E-261 | Epi-S3 |
| KRT3      | 1.46E-260 | 1.099835 | 0.965 | 0.555 | 2.67E-256 | Epi-S3 |
| PRSS27    | 5.74E-258 | 0.305272 | 0.303 | 0.039 | 1.04E-253 | Epi-S3 |
| S100A4    | 1.59E-257 | 0.524402 | 1     | 0.996 | 2.90E-253 | Epi-S3 |
| POLR2J3   | 2.59E-253 | 0.781009 | 1     | 0.867 | 4.71E-249 | Epi-S3 |
| B3GNT3    | 1.28E-251 | 0.352237 | 0.384 | 0.064 | 2.34E-247 | Epi-S3 |
| C12orf75  | 1.75E-251 | 0.801513 | 0.963 | 0.633 | 3.19E-247 | Epi-S3 |
| HOMER2    | 7.47E-251 | 0.480054 | 0.571 | 0.147 | 1.36E-246 | Epi-S3 |
| CALML5    | 8.20E-246 | 1.103203 | 0.682 | 0.232 | 1.49E-241 | Epi-S3 |
| MSLN      | 1.20E-243 | 0.693136 | 0.706 | 0.232 | 2.19E-239 | Epi-S3 |
| PERP      | 1.97E-241 | 0.559196 | 1     | 0.917 | 3.58E-237 | Epi-S3 |
| ANXA11    | 4.38E-240 | 0.689875 | 0.977 | 0.762 | 7.98E-236 | Epi-S3 |
| MRPL33    | 8.77E-239 | 0.720348 | 0.997 | 0.899 | 1.60E-234 | Epi-S3 |
| FXYD3     | 5.25E-230 | 0.568691 | 0.999 | 0.858 | 9.57E-226 | Epi-S3 |
| GPR110    | 3.56E-226 | 0.438294 | 0.508 | 0.127 | 6.48E-222 | Epi-S3 |
| DSC2      | 3.64E-224 | 0.686089 | 0.924 | 0.51  | 6.63E-220 | Epi-S3 |
| IL20RA    | 6.65E-220 | 0.717049 | 0.842 | 0.407 | 1.21E-215 | Epi-S3 |
| TSTD1     | 1.02E-219 | 0.635809 | 0.989 | 0.769 | 1.86E-215 | Epi-S3 |
| HRASLS2   | 1.60E-217 | 0.619879 | 0.565 | 0.168 | 2.91E-213 | Epi-S3 |
| GLRX      | 2.37E-217 | 0.703637 | 0.859 | 0.424 | 4.32E-213 | Epi-S3 |
| ST3GAL4   | 1.06E-216 | 0.63518  | 0.753 | 0.312 | 1.94E-212 | Epi-S3 |
| KRT12     | 1.12E-216 | 0.84141  | 0.991 | 0.819 | 2.04E-212 | Epi-S3 |
| C10orf54  | 2.24E-216 | 0.698441 | 0.966 | 0.719 | 4.09E-212 | Epi-S3 |
| RAB25     | 1.41E-215 | 0.660703 | 0.946 | 0.567 | 2.58E-211 | Epi-S3 |
| SCGB2A1   | 8.98E-213 | 0.780583 | 0.876 | 0.423 | 1.63E-208 | Epi-S3 |
| RB1       | 1.47E-212 | 0.844102 | 0.918 | 0.502 | 2.67E-208 | Epi-S3 |
| GOLM1     | 2.20E-211 | 0.368896 | 0.37  | 0.071 | 4.01E-207 | Epi-S3 |
| RHOD      | 1.58E-209 | 0.641512 | 0.847 | 0.43  | 2.88E-205 | Epi-S3 |
| LGALS1    | 2.10E-204 | 0.561885 | 0.776 | 0.318 | 3.83E-200 | Epi-S3 |
| LMO7      | 5.45E-204 | 0.657393 | 0.73  | 0.302 | 9.92E-200 | Epi-S3 |
| ACTG1     | 2.64E-203 | 0.517453 | 1     | 0.995 | 4.81E-199 | Epi-S3 |
| MSMO1     | 3.25E-202 | 0.641961 | 0.756 | 0.333 | 5.93E-198 | Epi-S3 |
| HSPB1     | 1.69E-201 | 0.588187 | 1     | 0.984 | 3.07E-197 | Epi-S3 |

|          |           |          |       |       |           |        |
|----------|-----------|----------|-------|-------|-----------|--------|
| CLDN4    | 1.89E-201 | 0.652101 | 0.986 | 0.601 | 3.44E-197 | Epi-S3 |
| PRDX1    | 1.27E-198 | 0.458798 | 0.999 | 0.987 | 2.31E-194 | Epi-S3 |
| AGR2     | 8.60E-194 | 0.806224 | 0.954 | 0.631 | 1.57E-189 | Epi-S3 |
| OAS1     | 1.47E-189 | 0.635025 | 0.614 | 0.226 | 2.67E-185 | Epi-S3 |
| MVK      | 3.87E-189 | 0.486178 | 0.64  | 0.233 | 7.04E-185 | Epi-S3 |
| CRYAB    | 2.38E-187 | 0.586132 | 0.991 | 0.875 | 4.33E-183 | Epi-S3 |
| CTSL2    | 1.44E-186 | 0.753083 | 0.992 | 0.633 | 2.62E-182 | Epi-S3 |
| CSTA     | 1.26E-185 | 0.573141 | 0.987 | 0.751 | 2.30E-181 | Epi-S3 |
| MUC15    | 3.97E-184 | 0.60894  | 0.852 | 0.437 | 7.24E-180 | Epi-S3 |
| PVRL4    | 1.45E-179 | 0.581795 | 0.899 | 0.484 | 2.64E-175 | Epi-S3 |
| SPINT1   | 5.28E-179 | 0.582024 | 0.949 | 0.633 | 9.61E-175 | Epi-S3 |
| SHMT1    | 5.53E-178 | 0.479048 | 0.676 | 0.269 | 1.01E-173 | Epi-S3 |
| ULBP2    | 1.12E-175 | 0.488174 | 0.66  | 0.255 | 2.03E-171 | Epi-S3 |
| PKIB     | 1.25E-175 | 0.469502 | 0.585 | 0.198 | 2.28E-171 | Epi-S3 |
| CLC      | 5.80E-175 | 0.365528 | 0.429 | 0.107 | 1.06E-170 | Epi-S3 |
| NQO1     | 1.35E-172 | 0.636404 | 0.999 | 0.944 | 2.45E-168 | Epi-S3 |
| NUAK2    | 2.92E-170 | 0.566003 | 0.83  | 0.395 | 5.33E-166 | Epi-S3 |
| SQLE     | 3.65E-167 | 0.584186 | 0.741 | 0.351 | 6.64E-163 | Epi-S3 |
| PHLDA2   | 3.86E-165 | 0.546759 | 0.999 | 0.899 | 7.04E-161 | Epi-S3 |
| PLBD1    | 1.57E-163 | 0.433404 | 0.543 | 0.182 | 2.86E-159 | Epi-S3 |
| SPINT2   | 3.50E-163 | 0.460939 | 1     | 0.829 | 6.37E-159 | Epi-S3 |
| C19orf33 | 3.73E-162 | 0.45409  | 1     | 0.845 | 6.78E-158 | Epi-S3 |
| DSG1     | 1.05E-160 | 0.536458 | 0.863 | 0.468 | 1.91E-156 | Epi-S3 |
| NLN      | 2.32E-159 | 0.310443 | 0.392 | 0.1   | 4.23E-155 | Epi-S3 |
| ID1      | 3.73E-159 | 0.583475 | 1     | 0.957 | 6.79E-155 | Epi-S3 |
| MYL12B   | 1.62E-158 | 0.374733 | 0.998 | 0.972 | 2.95E-154 | Epi-S3 |
| NDUFA4   | 1.66E-156 | 0.438416 | 0.998 | 0.959 | 3.03E-152 | Epi-S3 |
| ACTB     | 1.37E-155 | 0.39757  | 1     | 0.999 | 2.50E-151 | Epi-S3 |
| CD55     | 6.83E-155 | 0.546935 | 0.891 | 0.548 | 1.24E-150 | Epi-S3 |
| RAET1E   | 2.97E-154 | 0.369992 | 0.501 | 0.159 | 5.41E-150 | Epi-S3 |
| SNCG     | 2.16E-153 | 0.59746  | 0.744 | 0.354 | 3.94E-149 | Epi-S3 |
| VAMP8    | 1.62E-152 | 0.489314 | 0.969 | 0.753 | 2.95E-148 | Epi-S3 |
| RAB11A   | 2.23E-152 | 0.468158 | 0.979 | 0.851 | 4.06E-148 | Epi-S3 |
| S100A6   | 3.73E-152 | 0.330728 | 1     | 0.999 | 6.79E-148 | Epi-S3 |
| SLC25A3  | 5.53E-148 | 0.455625 | 0.984 | 0.906 | 1.01E-143 | Epi-S3 |
| HOPX     | 7.46E-148 | 0.792045 | 0.905 | 0.543 | 1.36E-143 | Epi-S3 |
| C8orf47  | 8.96E-148 | 0.539652 | 0.979 | 0.745 | 1.63E-143 | Epi-S3 |
| EVPL     | 1.07E-146 | 0.430657 | 0.612 | 0.241 | 1.95E-142 | Epi-S3 |
| MYO5A    | 3.64E-145 | 0.427416 | 0.491 | 0.16  | 6.63E-141 | Epi-S3 |
| LMTK3    | 9.26E-145 | 0.286006 | 0.281 | 0.058 | 1.69E-140 | Epi-S3 |
| EMP1     | 9.45E-144 | 0.524655 | 0.997 | 0.921 | 1.72E-139 | Epi-S3 |
| SRP68    | 1.57E-143 | 0.53073  | 0.843 | 0.522 | 2.86E-139 | Epi-S3 |
| CYP26A1  | 1.93E-143 | 0.582105 | 0.438 | 0.129 | 3.51E-139 | Epi-S3 |
| TRIM16   | 4.75E-140 | 0.542115 | 0.751 | 0.397 | 8.64E-136 | Epi-S3 |
| KRT27    | 5.16E-138 | 0.447667 | 0.41  | 0.124 | 9.40E-134 | Epi-S3 |
| GGT6     | 2.78E-137 | 0.356546 | 0.514 | 0.179 | 5.07E-133 | Epi-S3 |
| CD9      | 5.17E-137 | 0.379686 | 1     | 0.991 | 9.42E-133 | Epi-S3 |
| CD82     | 1.10E-135 | 0.50491  | 0.856 | 0.54  | 2.00E-131 | Epi-S3 |



|           |           |          |       |       |           |        |
|-----------|-----------|----------|-------|-------|-----------|--------|
| TUBA4A    | 5.89E-135 | 0.505129 | 0.967 | 0.734 | 1.07E-130 | Epi-S3 |
| HSP90AA1  | 4.51E-134 | 0.409464 | 0.998 | 0.974 | 8.21E-130 | Epi-S3 |
| C1orf116  | 6.87E-134 | 0.377635 | 0.6   | 0.244 | 1.25E-129 | Epi-S3 |
| ATP6V0B   | 1.30E-133 | 0.424378 | 0.986 | 0.867 | 2.37E-129 | Epi-S3 |
| IL1RN     | 6.90E-133 | 0.356315 | 0.916 | 0.541 | 1.26E-128 | Epi-S3 |
| CRB3      | 6.97E-133 | 0.377063 | 0.581 | 0.228 | 1.27E-128 | Epi-S3 |
| TRIM29    | 1.82E-132 | 0.459285 | 0.989 | 0.767 | 3.31E-128 | Epi-S3 |
| FGFBP1    | 1.15E-130 | 0.57894  | 0.783 | 0.416 | 2.09E-126 | Epi-S3 |
| EIF6      | 4.91E-130 | 0.457918 | 0.951 | 0.761 | 8.95E-126 | Epi-S3 |
| CCDC64B   | 1.01E-129 | 0.376158 | 0.559 | 0.215 | 1.83E-125 | Epi-S3 |
| FBP1      | 4.39E-129 | 0.271592 | 0.355 | 0.096 | 7.98E-125 | Epi-S3 |
| DAPL1     | 1.84E-128 | 0.490481 | 0.997 | 0.829 | 3.34E-124 | Epi-S3 |
| LINC00937 | 4.99E-127 | 0.368685 | 0.521 | 0.186 | 9.09E-123 | Epi-S3 |
| MYH14     | 5.15E-127 | 0.435248 | 0.706 | 0.338 | 9.37E-123 | Epi-S3 |
| NDUFV2    | 3.46E-126 | 0.415364 | 0.969 | 0.828 | 6.29E-122 | Epi-S3 |
| COX6A1    | 2.40E-125 | 0.339077 | 1     | 0.976 | 4.37E-121 | Epi-S3 |
| DENND2D   | 8.26E-125 | 0.308782 | 0.483 | 0.172 | 1.50E-120 | Epi-S3 |
| COX7A2    | 1.45E-124 | 0.322899 | 0.999 | 0.975 | 2.63E-120 | Epi-S3 |
| RCBTB2    | 2.92E-124 | 0.417164 | 0.642 | 0.287 | 5.31E-120 | Epi-S3 |
| PDCD4     | 4.49E-123 | 0.490365 | 0.929 | 0.699 | 8.17E-119 | Epi-S3 |
| TMSB4X    | 8.41E-121 | 0.373911 | 1     | 0.998 | 1.53E-116 | Epi-S3 |
| GALNT3    | 4.08E-120 | 0.425622 | 0.654 | 0.303 | 7.43E-116 | Epi-S3 |
| PPP1R14C  | 2.76E-119 | 0.396575 | 0.725 | 0.365 | 5.03E-115 | Epi-S3 |
| TPD52     | 1.22E-118 | 0.447089 | 0.93  | 0.661 | 2.23E-114 | Epi-S3 |
| COX6C     | 3.08E-118 | 0.33672  | 0.993 | 0.966 | 5.61E-114 | Epi-S3 |
| ANXA2     | 1.52E-117 | 0.292666 | 1     | 0.994 | 2.77E-113 | Epi-S3 |
| GPR115    | 1.57E-116 | 0.349171 | 0.491 | 0.184 | 2.86E-112 | Epi-S3 |
| CNGA1     | 5.34E-115 | 0.291272 | 0.413 | 0.132 | 9.72E-111 | Epi-S3 |
| FDFT1     | 5.32E-114 | 0.443196 | 0.786 | 0.465 | 9.69E-110 | Epi-S3 |
| SH2D4A    | 6.04E-114 | 0.375076 | 0.603 | 0.271 | 1.10E-109 | Epi-S3 |
| MFSD4     | 4.33E-113 | 0.38736  | 0.635 | 0.294 | 7.89E-109 | Epi-S3 |
| AGPAT2    | 1.21E-111 | 0.481798 | 0.841 | 0.577 | 2.21E-107 | Epi-S3 |
| MRPS10    | 3.90E-109 | 0.458027 | 0.882 | 0.623 | 7.09E-105 | Epi-S3 |
| SLC12A8   | 2.13E-108 | 0.350038 | 0.407 | 0.143 | 3.88E-104 | Epi-S3 |
| TM7SF2    | 3.42E-107 | 0.298203 | 0.471 | 0.174 | 6.23E-103 | Epi-S3 |
| B4GALT5   | 6.74E-107 | 0.336394 | 0.5   | 0.197 | 1.23E-102 | Epi-S3 |
| FA2H      | 5.86E-106 | 0.425192 | 0.701 | 0.352 | 1.07E-101 | Epi-S3 |
| NAPRT1    | 2.40E-105 | 0.402828 | 0.788 | 0.475 | 4.36E-101 | Epi-S3 |
| EZR       | 7.84E-104 | 0.404583 | 0.994 | 0.836 | 1.43E-99  | Epi-S3 |
| ZFAND6    | 8.44E-104 | 0.412734 | 0.857 | 0.614 | 1.54E-99  | Epi-S3 |
| TP53I3    | 1.07E-102 | 0.40267  | 0.801 | 0.484 | 1.95E-98  | Epi-S3 |
| BID       | 1.29E-102 | 0.356425 | 0.589 | 0.272 | 2.34E-98  | Epi-S3 |
| TMSB10    | 1.69E-101 | 0.306353 | 0.999 | 0.997 | 3.09E-97  | Epi-S3 |
| BNIPL     | 2.06E-101 | 0.388101 | 0.683 | 0.361 | 3.76E-97  | Epi-S3 |
| GSTP1     | 7.09E-100 | 0.310878 | 1     | 0.996 | 1.29E-95  | Epi-S3 |
| DAAM1     | 1.14E-99  | 0.494989 | 0.898 | 0.625 | 2.08E-95  | Epi-S3 |
| MGARP     | 7.98E-99  | 0.442636 | 0.981 | 0.819 | 1.45E-94  | Epi-S3 |
| PMVK      | 8.11E-99  | 0.390908 | 0.937 | 0.724 | 1.48E-94  | Epi-S3 |

|          |          |          |       |       |          |        |
|----------|----------|----------|-------|-------|----------|--------|
| COX7B    | 1.32E-98 | 0.332559 | 0.995 | 0.933 | 2.40E-94 | Epi-S3 |
| PPL      | 3.79E-98 | 0.35544  | 0.641 | 0.314 | 6.90E-94 | Epi-S3 |
| CHMP4B   | 4.75E-98 | 0.367212 | 0.949 | 0.756 | 8.64E-94 | Epi-S3 |
| SH3BGRL3 | 2.62E-97 | 0.348819 | 0.998 | 0.95  | 4.77E-93 | Epi-S3 |
| EML2     | 1.20E-96 | 0.380143 | 0.744 | 0.435 | 2.18E-92 | Epi-S3 |
| ABHD11   | 1.75E-96 | 0.383805 | 0.664 | 0.35  | 3.19E-92 | Epi-S3 |
| RAC1     | 2.04E-96 | 0.319928 | 0.994 | 0.952 | 3.72E-92 | Epi-S3 |
| COX5A    | 2.04E-96 | 0.337956 | 0.977 | 0.856 | 3.72E-92 | Epi-S3 |
| ELF3     | 2.07E-96 | 0.429251 | 0.998 | 0.8   | 3.77E-92 | Epi-S3 |
| SERF2    | 1.15E-95 | 0.2747   | 0.999 | 0.991 | 2.09E-91 | Epi-S3 |
| GNB2     | 5.36E-95 | 0.360747 | 0.963 | 0.836 | 9.75E-91 | Epi-S3 |
| CSTB     | 7.72E-95 | 0.315387 | 0.994 | 0.935 | 1.41E-90 | Epi-S3 |
| CLU      | 2.20E-94 | 0.374014 | 1     | 0.991 | 4.01E-90 | Epi-S3 |
| PIR      | 6.91E-94 | 0.404678 | 0.825 | 0.514 | 1.26E-89 | Epi-S3 |
| DSP      | 8.23E-94 | 0.395924 | 0.974 | 0.749 | 1.50E-89 | Epi-S3 |
| GADD45B  | 2.28E-92 | 0.424627 | 0.985 | 0.925 | 4.16E-88 | Epi-S3 |
| NOP10    | 3.24E-92 | 0.357402 | 0.932 | 0.757 | 5.90E-88 | Epi-S3 |
| S100A14  | 3.02E-91 | 0.390712 | 0.986 | 0.767 | 5.50E-87 | Epi-S3 |
| MBD2     | 4.54E-91 | 0.333448 | 0.561 | 0.265 | 8.26E-87 | Epi-S3 |
| CALM1    | 1.14E-90 | 0.346809 | 0.994 | 0.959 | 2.08E-86 | Epi-S3 |
| BCL2L13  | 3.91E-90 | 0.387185 | 0.953 | 0.756 | 7.12E-86 | Epi-S3 |
| PPIA     | 4.13E-90 | 0.336736 | 0.994 | 0.958 | 7.52E-86 | Epi-S3 |
| SDR16C5  | 4.97E-90 | 0.352966 | 0.661 | 0.343 | 9.05E-86 | Epi-S3 |
| SH3GL3   | 9.19E-89 | 0.268375 | 0.421 | 0.16  | 1.67E-84 | Epi-S3 |
| PHLDB3   | 1.01E-88 | 0.283448 | 0.403 | 0.154 | 1.83E-84 | Epi-S3 |
| BOLA2    | 1.40E-88 | 0.35582  | 0.866 | 0.625 | 2.55E-84 | Epi-S3 |
| CCDC12   | 3.02E-88 | 0.360923 | 0.864 | 0.599 | 5.50E-84 | Epi-S3 |
| AP1M2    | 3.37E-87 | 0.320825 | 0.603 | 0.307 | 6.14E-83 | Epi-S3 |
| RER1     | 7.65E-87 | 0.356888 | 0.936 | 0.741 | 1.39E-82 | Epi-S3 |
| PSAP     | 2.21E-86 | 0.381609 | 0.998 | 0.951 | 4.03E-82 | Epi-S3 |
| TUBB4B   | 2.25E-86 | 0.338973 | 0.995 | 0.918 | 4.10E-82 | Epi-S3 |
| MAPK13   | 1.11E-85 | 0.315807 | 0.574 | 0.279 | 2.02E-81 | Epi-S3 |
| PGD      | 1.98E-85 | 0.380888 | 0.832 | 0.57  | 3.60E-81 | Epi-S3 |
| ATP6V1E1 | 2.73E-85 | 0.369207 | 0.91  | 0.728 | 4.97E-81 | Epi-S3 |
| ARPC2    | 3.50E-85 | 0.30991  | 0.993 | 0.941 | 6.37E-81 | Epi-S3 |
| SPHK1    | 6.25E-85 | 0.26553  | 0.46  | 0.187 | 1.14E-80 | Epi-S3 |
| C6orf132 | 7.76E-85 | 0.309685 | 0.633 | 0.326 | 1.41E-80 | Epi-S3 |
| AMPD3    | 1.05E-84 | 0.321258 | 0.486 | 0.216 | 1.92E-80 | Epi-S3 |
| IER3IP1  | 1.93E-84 | 0.36563  | 0.934 | 0.74  | 3.52E-80 | Epi-S3 |
| KIF21A   | 2.85E-84 | 0.348298 | 0.739 | 0.426 | 5.18E-80 | Epi-S3 |
| ACAT2    | 3.34E-84 | 0.349344 | 0.59  | 0.303 | 6.07E-80 | Epi-S3 |
| CAPNS1   | 3.77E-84 | 0.371625 | 0.873 | 0.627 | 6.87E-80 | Epi-S3 |
| EPS8L2   | 6.10E-84 | 0.343491 | 0.662 | 0.37  | 1.11E-79 | Epi-S3 |
| SCNN1A   | 6.39E-84 | 0.270044 | 0.465 | 0.2   | 1.16E-79 | Epi-S3 |
| ST14     | 8.83E-84 | 0.268718 | 0.443 | 0.18  | 1.61E-79 | Epi-S3 |
| CAMK2N1  | 9.44E-84 | 0.277714 | 0.487 | 0.21  | 1.72E-79 | Epi-S3 |
| CAPN1    | 9.50E-83 | 0.354478 | 0.904 | 0.685 | 1.73E-78 | Epi-S3 |
| AKR1A1   | 3.46E-82 | 0.358368 | 0.884 | 0.652 | 6.31E-78 | Epi-S3 |

|              |          |          |       |       |          |        |
|--------------|----------|----------|-------|-------|----------|--------|
| RAET1G       | 5.49E-82 | 0.363535 | 0.733 | 0.428 | 1.00E-77 | Epi-S3 |
| NSG1         | 1.47E-81 | 0.355458 | 0.74  | 0.438 | 2.67E-77 | Epi-S3 |
| GPR137B      | 4.83E-81 | 0.290784 | 0.446 | 0.192 | 8.80E-77 | Epi-S3 |
| LOC100130476 | 1.04E-80 | 0.269064 | 0.402 | 0.156 | 1.90E-76 | Epi-S3 |
| YWHAZ        | 1.07E-79 | 0.32102  | 0.967 | 0.835 | 1.95E-75 | Epi-S3 |
| SCD5         | 1.92E-79 | 0.376597 | 0.739 | 0.443 | 3.49E-75 | Epi-S3 |
| PIM1         | 3.11E-79 | 0.370259 | 0.8   | 0.528 | 5.67E-75 | Epi-S3 |
| POLE4        | 4.19E-79 | 0.359042 | 0.72  | 0.45  | 7.63E-75 | Epi-S3 |
| TALDO1       | 8.52E-79 | 0.346305 | 0.953 | 0.793 | 1.55E-74 | Epi-S3 |
| ARF1         | 1.46E-78 | 0.282601 | 0.986 | 0.919 | 2.66E-74 | Epi-S3 |
| DYNLRB1      | 5.15E-78 | 0.332518 | 0.958 | 0.809 | 9.38E-74 | Epi-S3 |
| NDUFB9       | 1.26E-77 | 0.309643 | 0.96  | 0.849 | 2.29E-73 | Epi-S3 |
| TINCR        | 1.64E-77 | 0.307232 | 0.511 | 0.244 | 2.99E-73 | Epi-S3 |
| AIM1         | 3.27E-77 | 0.326081 | 0.764 | 0.445 | 5.96E-73 | Epi-S3 |
| INPP1        | 7.67E-77 | 0.368009 | 0.604 | 0.341 | 1.40E-72 | Epi-S3 |
| EPCAM        | 1.35E-75 | 0.267742 | 0.394 | 0.157 | 2.46E-71 | Epi-S3 |
| CBLC         | 1.78E-74 | 0.269103 | 0.441 | 0.196 | 3.25E-70 | Epi-S3 |
| IL18         | 2.31E-74 | 0.353468 | 0.751 | 0.483 | 4.20E-70 | Epi-S3 |
| ZNF750       | 2.96E-74 | 0.29726  | 0.59  | 0.302 | 5.38E-70 | Epi-S3 |
| REEP6        | 1.06E-73 | 0.280564 | 0.514 | 0.245 | 1.92E-69 | Epi-S3 |
| OBFC1        | 4.20E-73 | 0.348823 | 0.627 | 0.368 | 7.64E-69 | Epi-S3 |
| EMP2         | 1.46E-72 | 0.324706 | 0.912 | 0.701 | 2.66E-68 | Epi-S3 |
| RASSF7       | 1.86E-72 | 0.308219 | 0.588 | 0.318 | 3.38E-68 | Epi-S3 |
| PID1         | 5.53E-72 | 0.317854 | 0.642 | 0.347 | 1.01E-67 | Epi-S3 |
| TIMM17A      | 3.22E-71 | 0.31924  | 0.839 | 0.632 | 5.85E-67 | Epi-S3 |
| PYGL         | 3.52E-71 | 0.323004 | 0.746 | 0.469 | 6.41E-67 | Epi-S3 |
| RIOK3        | 6.92E-71 | 0.359961 | 0.705 | 0.465 | 1.26E-66 | Epi-S3 |
| YPEL5        | 2.30E-70 | 0.320525 | 0.967 | 0.873 | 4.18E-66 | Epi-S3 |
| TECR         | 1.13E-69 | 0.290223 | 0.973 | 0.883 | 2.06E-65 | Epi-S3 |
| REEP4        | 1.30E-69 | 0.313334 | 0.656 | 0.386 | 2.37E-65 | Epi-S3 |
| NDUFB3       | 2.76E-69 | 0.297736 | 0.951 | 0.818 | 5.02E-65 | Epi-S3 |
| PKP3         | 3.83E-69 | 0.346256 | 0.773 | 0.514 | 6.97E-65 | Epi-S3 |
| GHITM        | 4.29E-69 | 0.305248 | 0.957 | 0.848 | 7.80E-65 | Epi-S3 |
| A4GALT       | 2.44E-68 | 0.294425 | 0.789 | 0.515 | 4.45E-64 | Epi-S3 |
| CMAS         | 4.48E-68 | 0.320579 | 0.69  | 0.45  | 8.15E-64 | Epi-S3 |
| FKBP4        | 1.17E-67 | 0.303084 | 0.682 | 0.407 | 2.14E-63 | Epi-S3 |
| SIRT7        | 4.20E-67 | 0.289054 | 0.594 | 0.328 | 7.65E-63 | Epi-S3 |
| NDUFC1       | 1.88E-66 | 0.267254 | 0.974 | 0.912 | 3.43E-62 | Epi-S3 |
| EML3         | 1.96E-66 | 0.3509   | 0.578 | 0.326 | 3.56E-62 | Epi-S3 |
| NECAP2       | 6.31E-66 | 0.294867 | 0.54  | 0.29  | 1.15E-61 | Epi-S3 |
| ESRP1        | 1.20E-65 | 0.273692 | 0.542 | 0.285 | 2.19E-61 | Epi-S3 |
| CCND1        | 2.60E-65 | 0.327222 | 0.895 | 0.652 | 4.74E-61 | Epi-S3 |
| SYT8         | 5.63E-65 | 0.307104 | 0.984 | 0.747 | 1.03E-60 | Epi-S3 |
| BIK          | 5.81E-65 | 0.304186 | 0.568 | 0.306 | 1.06E-60 | Epi-S3 |
| JUP          | 1.52E-64 | 0.310405 | 0.873 | 0.65  | 2.76E-60 | Epi-S3 |
| SLC50A1      | 1.20E-63 | 0.271611 | 0.532 | 0.283 | 2.18E-59 | Epi-S3 |
| PGAM1        | 1.21E-62 | 0.285946 | 0.968 | 0.879 | 2.20E-58 | Epi-S3 |
| AP1S1        | 1.30E-62 | 0.32127  | 0.759 | 0.526 | 2.37E-58 | Epi-S3 |

|           |          |          |       |       |          |        |
|-----------|----------|----------|-------|-------|----------|--------|
| TMPRSS4   | 2.07E-62 | 0.298509 | 0.683 | 0.415 | 3.76E-58 | Epi-S3 |
| PAX6      | 2.90E-62 | 0.32182  | 0.983 | 0.792 | 5.27E-58 | Epi-S3 |
| RNF149    | 1.74E-61 | 0.278917 | 0.68  | 0.415 | 3.16E-57 | Epi-S3 |
| NR4A1     | 8.52E-61 | 0.341396 | 0.693 | 0.44  | 1.55E-56 | Epi-S3 |
| COX17     | 2.07E-60 | 0.289758 | 0.808 | 0.58  | 3.77E-56 | Epi-S3 |
| PHLDA3    | 5.73E-60 | 0.287545 | 0.934 | 0.743 | 1.04E-55 | Epi-S3 |
| LAPTM4B   | 1.36E-59 | 0.307295 | 0.653 | 0.406 | 2.47E-55 | Epi-S3 |
| RBX1      | 5.68E-59 | 0.261411 | 0.969 | 0.881 | 1.03E-54 | Epi-S3 |
| TRIP10    | 6.67E-59 | 0.28406  | 0.589 | 0.338 | 1.21E-54 | Epi-S3 |
| CAP1      | 2.41E-58 | 0.299026 | 0.868 | 0.707 | 4.40E-54 | Epi-S3 |
| HMGCS1    | 3.08E-58 | 0.280932 | 0.561 | 0.308 | 5.62E-54 | Epi-S3 |
| POLR2I    | 7.30E-58 | 0.287302 | 0.902 | 0.741 | 1.33E-53 | Epi-S3 |
| RTCB      | 1.18E-57 | 0.290641 | 0.743 | 0.518 | 2.15E-53 | Epi-S3 |
| WIBG      | 2.93E-57 | 0.289795 | 0.67  | 0.43  | 5.34E-53 | Epi-S3 |
| PEA15     | 4.92E-57 | 0.282113 | 0.676 | 0.421 | 8.96E-53 | Epi-S3 |
| HEBP2     | 2.87E-56 | 0.29285  | 0.831 | 0.601 | 5.22E-52 | Epi-S3 |
| OSTF1     | 1.05E-55 | 0.285007 | 0.83  | 0.625 | 1.91E-51 | Epi-S3 |
| HTATIP2   | 1.88E-55 | 0.286273 | 0.689 | 0.45  | 3.43E-51 | Epi-S3 |
| SERBP1    | 3.07E-55 | 0.264118 | 0.961 | 0.86  | 5.59E-51 | Epi-S3 |
| GABARAPL2 | 4.09E-55 | 0.259188 | 0.966 | 0.872 | 7.44E-51 | Epi-S3 |
| TIMM8B    | 4.73E-55 | 0.28036  | 0.907 | 0.732 | 8.61E-51 | Epi-S3 |
| SSBP1     | 5.20E-55 | 0.261995 | 0.923 | 0.798 | 9.46E-51 | Epi-S3 |
| NDUFAB1   | 1.77E-54 | 0.276784 | 0.907 | 0.797 | 3.23E-50 | Epi-S3 |
| ELOVL1    | 1.92E-54 | 0.259328 | 0.578 | 0.341 | 3.49E-50 | Epi-S3 |
| PPP4C     | 2.49E-54 | 0.280498 | 0.872 | 0.677 | 4.53E-50 | Epi-S3 |
| PRPSAP1   | 4.75E-54 | 0.287092 | 0.626 | 0.399 | 8.65E-50 | Epi-S3 |
| TNNT3     | 1.25E-53 | 0.259453 | 0.717 | 0.441 | 2.28E-49 | Epi-S3 |
| SMAGP     | 3.19E-53 | 0.253152 | 0.618 | 0.371 | 5.81E-49 | Epi-S3 |
| NAGK      | 4.22E-53 | 0.270601 | 0.682 | 0.442 | 7.69E-49 | Epi-S3 |
| MMAB      | 2.64E-52 | 0.25835  | 0.525 | 0.302 | 4.81E-48 | Epi-S3 |
| LOC728554 | 4.94E-52 | 0.291065 | 0.841 | 0.631 | 9.00E-48 | Epi-S3 |
| DCXR      | 9.60E-52 | 0.280237 | 0.882 | 0.697 | 1.75E-47 | Epi-S3 |
| TBCB      | 1.13E-51 | 0.264476 | 0.859 | 0.671 | 2.06E-47 | Epi-S3 |
| IDI1      | 2.91E-51 | 0.292119 | 0.693 | 0.464 | 5.31E-47 | Epi-S3 |
| FDX1      | 1.33E-50 | 0.287462 | 0.769 | 0.583 | 2.43E-46 | Epi-S3 |
| COX14     | 1.45E-50 | 0.260085 | 0.903 | 0.751 | 2.64E-46 | Epi-S3 |
| FAM162A   | 1.86E-50 | 0.269198 | 0.891 | 0.741 | 3.39E-46 | Epi-S3 |
| TMEM141   | 1.97E-50 | 0.283818 | 0.697 | 0.476 | 3.59E-46 | Epi-S3 |
| DYNLT1    | 3.50E-50 | 0.263095 | 0.937 | 0.799 | 6.38E-46 | Epi-S3 |
| UNC5B-AS1 | 4.35E-50 | 0.297602 | 0.535 | 0.308 | 7.91E-46 | Epi-S3 |
| NHP2      | 5.78E-50 | 0.271073 | 0.906 | 0.766 | 1.05E-45 | Epi-S3 |
| PRSS8     | 8.27E-50 | 0.26226  | 0.606 | 0.376 | 1.51E-45 | Epi-S3 |
| BTF3L4    | 1.62E-49 | 0.269452 | 0.808 | 0.627 | 2.95E-45 | Epi-S3 |
| TUFT1     | 2.31E-49 | 0.265062 | 0.606 | 0.368 | 4.21E-45 | Epi-S3 |
| WLS       | 2.60E-49 | 0.267885 | 0.719 | 0.485 | 4.74E-45 | Epi-S3 |
| ALDH3A2   | 3.34E-49 | 0.27848  | 0.843 | 0.638 | 6.08E-45 | Epi-S3 |
| YWHAB     | 2.84E-48 | 0.280923 | 0.916 | 0.79  | 5.16E-44 | Epi-S3 |
| SDC4      | 3.43E-47 | 0.311079 | 0.827 | 0.601 | 6.24E-43 | Epi-S3 |

|              |           |          |       |       |           |        |
|--------------|-----------|----------|-------|-------|-----------|--------|
| MTCH1        | 6.40E-47  | 0.270397 | 0.889 | 0.758 | 1.16E-42  | Epi-S3 |
| KRT5         | 9.26E-46  | 0.280535 | 1     | 0.876 | 1.69E-41  | Epi-S3 |
| ARPC5L       | 3.34E-45  | 0.258107 | 0.778 | 0.575 | 6.08E-41  | Epi-S3 |
| BAD          | 1.86E-44  | 0.27235  | 0.77  | 0.588 | 3.38E-40  | Epi-S3 |
| MRPL20       | 2.33E-44  | 0.250457 | 0.897 | 0.745 | 4.24E-40  | Epi-S3 |
| THOC3        | 2.83E-44  | 0.258508 | 0.682 | 0.467 | 5.16E-40  | Epi-S3 |
| SERINC2      | 1.43E-43  | 0.252596 | 0.769 | 0.543 | 2.60E-39  | Epi-S3 |
| FDPS         | 3.09E-43  | 0.265639 | 0.698 | 0.504 | 5.63E-39  | Epi-S3 |
| GLO1         | 1.26E-41  | 0.258143 | 0.804 | 0.612 | 2.29E-37  | Epi-S3 |
| SLC20A1      | 2.75E-41  | 0.283622 | 0.642 | 0.418 | 5.00E-37  | Epi-S3 |
| MALL         | 5.03E-41  | 0.258495 | 0.929 | 0.711 | 9.16E-37  | Epi-S3 |
| RND3         | 1.14E-39  | 0.417101 | 0.775 | 0.611 | 2.07E-35  | Epi-S3 |
| HSPA8        | 1.44E-39  | 0.259988 | 0.911 | 0.786 | 2.63E-35  | Epi-S3 |
| KRT18        | 1.94E-38  | 0.259991 | 0.934 | 0.733 | 3.54E-34  | Epi-S3 |
| NDFIP2       | 1.02E-37  | 0.250511 | 0.614 | 0.414 | 1.86E-33  | Epi-S3 |
| ASPH         | 1.13E-37  | 0.263904 | 0.945 | 0.838 | 2.06E-33  | Epi-S3 |
| TUBB6        | 1.79E-37  | 0.281398 | 0.701 | 0.514 | 3.25E-33  | Epi-S3 |
| RHOC         | 1.44E-36  | 0.270251 | 0.842 | 0.72  | 2.61E-32  | Epi-S3 |
| PLS3         | 5.45E-36  | 0.253275 | 0.566 | 0.375 | 9.93E-32  | Epi-S3 |
| FAM83A       | 1.30E-34  | 0.260273 | 0.771 | 0.574 | 2.36E-30  | Epi-S3 |
| HBEGF        | 4.78E-34  | 0.318441 | 0.489 | 0.308 | 8.70E-30  | Epi-S3 |
| SIK1         | 7.07E-34  | 0.257908 | 0.646 | 0.453 | 1.29E-29  | Epi-S3 |
| AREG         | 9.53E-22  | 0.297394 | 0.603 | 0.436 | 1.74E-17  | Epi-S3 |
| MMP10        | 0         | 1.306833 | 0.425 | 0.034 | 0         | LPC-2  |
| S100A2       | 2.48E-303 | 1.737867 | 0.989 | 0.411 | 4.52E-299 | LPC-2  |
| KRT14        | 1.58E-232 | 1.438166 | 0.998 | 0.566 | 2.88E-228 | LPC-2  |
| KRT15        | 9.06E-221 | 1.747129 | 0.923 | 0.416 | 1.65E-216 | LPC-2  |
| GAS5         | 6.18E-195 | 0.896267 | 0.993 | 0.933 | 1.13E-190 | LPC-2  |
| C17orf76-AS1 | 1.03E-177 | 0.757055 | 0.998 | 0.963 | 1.87E-173 | LPC-2  |
| SLC6A6       | 6.13E-174 | 0.88018  | 0.543 | 0.143 | 1.12E-169 | LPC-2  |
| RPL13A       | 3.62E-172 | 0.5409   | 1     | 0.999 | 6.58E-168 | LPC-2  |
| FAM107A      | 1.89E-169 | 0.748462 | 0.387 | 0.071 | 3.43E-165 | LPC-2  |
| EEF1G        | 3.13E-169 | 0.619398 | 0.996 | 0.988 | 5.70E-165 | LPC-2  |
| RPS27        | 5.21E-166 | 0.549975 | 1     | 1     | 9.49E-162 | LPC-2  |
| EEF1A1       | 4.68E-162 | 0.678445 | 1     | 0.999 | 8.52E-158 | LPC-2  |
| RPS27A       | 1.21E-160 | 0.628176 | 1     | 0.997 | 2.20E-156 | LPC-2  |
| RPLP1        | 1.16E-159 | 0.495589 | 1     | 1     | 2.12E-155 | LPC-2  |
| COL18A1      | 6.94E-159 | 0.427833 | 0.365 | 0.065 | 1.26E-154 | LPC-2  |
| RPS3         | 1.99E-156 | 0.614485 | 1     | 0.996 | 3.62E-152 | LPC-2  |
| CXCL14       | 2.35E-153 | 1.033948 | 0.998 | 0.887 | 4.29E-149 | LPC-2  |
| CH25H        | 7.54E-153 | 0.485949 | 0.258 | 0.034 | 1.37E-148 | LPC-2  |
| RPL11        | 1.43E-152 | 0.440287 | 1     | 0.999 | 2.60E-148 | LPC-2  |
| RPL3         | 5.34E-150 | 0.525546 | 1     | 0.999 | 9.72E-146 | LPC-2  |
| RPL4         | 8.80E-149 | 0.585187 | 1     | 0.986 | 1.60E-144 | LPC-2  |
| RPL34        | 2.24E-145 | 0.572091 | 1     | 1     | 4.08E-141 | LPC-2  |
| GNB2L1       | 4.50E-145 | 0.515988 | 0.998 | 0.99  | 8.19E-141 | LPC-2  |
| RPS9         | 2.46E-143 | 0.54624  | 1     | 0.998 | 4.48E-139 | LPC-2  |
| RPS19        | 7.73E-143 | 0.581255 | 1     | 0.998 | 1.41E-138 | LPC-2  |

|                |           |          |       |       |           |       |
|----------------|-----------|----------|-------|-------|-----------|-------|
| RPL35A         | 2.35E-142 | 0.491863 | 1     | 0.998 | 4.28E-138 | LPC-2 |
| RPS7           | 1.52E-137 | 0.45802  | 1     | 0.993 | 2.77E-133 | LPC-2 |
| RPL30          | 3.41E-137 | 0.448751 | 1     | 0.998 | 6.22E-133 | LPC-2 |
| RPS3A          | 7.69E-137 | 0.517404 | 1     | 0.998 | 1.40E-132 | LPC-2 |
| RPL13          | 4.40E-136 | 0.575447 | 1     | 0.999 | 8.00E-132 | LPC-2 |
| RPS12          | 3.91E-135 | 0.500393 | 1     | 0.999 | 7.12E-131 | LPC-2 |
| RPL5           | 5.14E-135 | 0.673274 | 0.998 | 0.993 | 9.36E-131 | LPC-2 |
| ENSG0000021008 | 1.23E-134 | 0.725946 | 0.996 | 1     | 2.24E-130 | LPC-2 |
| RPS8           | 3.12E-133 | 0.457496 | 1     | 0.999 | 5.67E-129 | LPC-2 |
| RPS23          | 1.91E-130 | 0.411592 | 1     | 0.998 | 3.48E-126 | LPC-2 |
| RPLP2          | 6.53E-129 | 0.443424 | 1     | 0.999 | 1.19E-124 | LPC-2 |
| RPL14          | 6.47E-128 | 0.503643 | 0.998 | 0.995 | 1.18E-123 | LPC-2 |
| RPS15A         | 3.21E-127 | 0.466118 | 0.998 | 0.997 | 5.84E-123 | LPC-2 |
| ENSG0000021145 | 7.16E-125 | 0.802792 | 0.996 | 0.997 | 1.30E-120 | LPC-2 |
| RPS17L         | 5.54E-124 | 0.419177 | 1     | 0.996 | 1.01E-119 | LPC-2 |
| RPL15          | 2.63E-123 | 0.406916 | 0.998 | 0.999 | 4.79E-119 | LPC-2 |
| RPL10A         | 2.27E-122 | 0.493263 | 1     | 0.995 | 4.14E-118 | LPC-2 |
| RPL37          | 3.68E-122 | 0.458569 | 1     | 0.995 | 6.70E-118 | LPC-2 |
| RPL10          | 6.10E-122 | 0.489801 | 1     | 1     | 1.11E-117 | LPC-2 |
| ENSG0000019893 | 1.51E-115 | 0.530276 | 0.998 | 0.998 | 2.75E-111 | LPC-2 |
| RPS5           | 2.18E-114 | 0.463164 | 0.996 | 0.989 | 3.97E-110 | LPC-2 |
| RPL7           | 8.06E-114 | 0.441969 | 1     | 0.998 | 1.47E-109 | LPC-2 |
| RPS16          | 1.85E-112 | 0.436908 | 1     | 0.994 | 3.36E-108 | LPC-2 |
| RPS20          | 2.08E-112 | 0.427149 | 1     | 0.997 | 3.79E-108 | LPC-2 |
| RPS6           | 2.46E-112 | 0.521533 | 1     | 0.999 | 4.47E-108 | LPC-2 |
| GLTSCR2        | 4.56E-112 | 0.755977 | 0.943 | 0.824 | 8.30E-108 | LPC-2 |
| RPL17          | 7.61E-112 | 0.5345   | 0.998 | 0.985 | 1.38E-107 | LPC-2 |
| RPL31          | 1.36E-111 | 0.441821 | 0.998 | 0.998 | 2.48E-107 | LPC-2 |
| RPL6           | 3.18E-111 | 0.466306 | 1     | 0.991 | 5.79E-107 | LPC-2 |
| BCAM           | 1.09E-110 | 0.695325 | 0.711 | 0.318 | 1.99E-106 | LPC-2 |
| RPL32          | 1.19E-110 | 0.497507 | 1     | 0.999 | 2.16E-106 | LPC-2 |
| RPL7A          | 7.56E-108 | 0.425764 | 0.998 | 0.987 | 1.38E-103 | LPC-2 |
| RPL27A         | 8.77E-107 | 0.385052 | 1     | 0.998 | 1.60E-102 | LPC-2 |
| ATP1B3         | 2.53E-106 | 0.628519 | 0.959 | 0.82  | 4.60E-102 | LPC-2 |
| NAP1L1         | 4.09E-106 | 0.693466 | 0.908 | 0.73  | 7.45E-102 | LPC-2 |
| RPL26          | 5.93E-103 | 0.366691 | 1     | 0.999 | 1.08E-98  | LPC-2 |
| CAV1           | 4.02E-102 | 0.548933 | 0.639 | 0.252 | 7.32E-98  | LPC-2 |
| RPS15          | 2.02E-101 | 0.327267 | 1     | 0.999 | 3.67E-97  | LPC-2 |
| RPL19          | 4.01E-100 | 0.336868 | 1     | 0.999 | 7.31E-96  | LPC-2 |
| CXCL1          | 7.68E-99  | 0.72067  | 0.429 | 0.123 | 1.40E-94  | LPC-2 |
| RPL39          | 1.11E-96  | 0.38815  | 1     | 0.999 | 2.03E-92  | LPC-2 |
| RPL18          | 5.49E-95  | 0.383369 | 1     | 0.996 | 9.99E-91  | LPC-2 |
| PTN            | 1.58E-94  | 0.466887 | 0.346 | 0.087 | 2.87E-90  | LPC-2 |
| RPL22          | 4.63E-94  | 0.391081 | 1     | 0.994 | 8.43E-90  | LPC-2 |
| RPL21          | 6.09E-93  | 0.41044  | 1     | 0.999 | 1.11E-88  | LPC-2 |
| RPL29          | 2.88E-92  | 0.406275 | 0.998 | 0.992 | 5.24E-88  | LPC-2 |
| RPL18A         | 1.82E-91  | 0.40997  | 1     | 0.997 | 3.32E-87  | LPC-2 |
| RPL8           | 1.58E-90  | 0.408495 | 1     | 0.998 | 2.89E-86  | LPC-2 |

|                |          |          |       |       |          |       |
|----------------|----------|----------|-------|-------|----------|-------|
| RPS25          | 2.85E-88 | 0.353339 | 1     | 0.998 | 5.19E-84 | LPC-2 |
| RPLP0          | 4.41E-88 | 0.39426  | 1     | 0.992 | 8.03E-84 | LPC-2 |
| RPL12          | 1.69E-87 | 0.487311 | 1     | 0.998 | 3.07E-83 | LPC-2 |
| RPS4X          | 4.82E-87 | 0.510575 | 1     | 0.999 | 8.77E-83 | LPC-2 |
| RPS14          | 5.30E-87 | 0.376504 | 1     | 1     | 9.64E-83 | LPC-2 |
| RPS11          | 2.12E-86 | 0.383407 | 0.993 | 0.985 | 3.85E-82 | LPC-2 |
| RPS18          | 6.77E-86 | 0.352372 | 1     | 1     | 1.23E-81 | LPC-2 |
| RPS24          | 2.05E-85 | 0.3394   | 1     | 0.998 | 3.73E-81 | LPC-2 |
| PHLDA1         | 3.26E-85 | 0.593179 | 0.517 | 0.196 | 5.94E-81 | LPC-2 |
| EEF1D          | 3.12E-84 | 0.414648 | 0.993 | 0.977 | 5.68E-80 | LPC-2 |
| FAM46A         | 5.65E-84 | 0.668678 | 0.722 | 0.419 | 1.03E-79 | LPC-2 |
| RPL41          | 2.18E-82 | 0.267481 | 1     | 1     | 3.97E-78 | LPC-2 |
| DST            | 3.17E-82 | 0.62209  | 0.676 | 0.354 | 5.76E-78 | LPC-2 |
| CITED2         | 1.72E-80 | 0.939593 | 0.86  | 0.642 | 3.13E-76 | LPC-2 |
| RPS13          | 3.77E-80 | 0.336455 | 1     | 0.998 | 6.86E-76 | LPC-2 |
| RPSA           | 1.33E-78 | 0.45749  | 0.95  | 0.868 | 2.42E-74 | LPC-2 |
| EIF3E          | 1.81E-78 | 0.63252  | 0.919 | 0.819 | 3.30E-74 | LPC-2 |
| LTB4R          | 9.37E-76 | 0.378654 | 0.331 | 0.099 | 1.71E-71 | LPC-2 |
| HNRNPA1        | 4.75E-74 | 0.408205 | 0.996 | 0.969 | 8.65E-70 | LPC-2 |
| PDLIM1         | 6.63E-74 | 0.479257 | 0.928 | 0.767 | 1.21E-69 | LPC-2 |
| RPL36          | 7.02E-72 | 0.352438 | 0.998 | 0.997 | 1.28E-67 | LPC-2 |
| RPS10          | 3.51E-71 | 0.449705 | 0.996 | 0.978 | 6.39E-67 | LPC-2 |
| GAPDH          | 2.97E-70 | 0.38206  | 1     | 0.998 | 5.40E-66 | LPC-2 |
| RPL24          | 3.98E-70 | 0.335833 | 1     | 0.994 | 7.25E-66 | LPC-2 |
| RPS28          | 6.73E-70 | 0.278755 | 0.998 | 0.999 | 1.22E-65 | LPC-2 |
| FOS            | 1.64E-67 | 0.64408  | 0.98  | 0.974 | 2.99E-63 | LPC-2 |
| ZFAS1          | 2.20E-67 | 0.464409 | 0.945 | 0.864 | 4.01E-63 | LPC-2 |
| RPL23A         | 1.14E-65 | 0.29587  | 1     | 0.998 | 2.08E-61 | LPC-2 |
| NPM1           | 3.42E-65 | 0.624456 | 0.971 | 0.927 | 6.23E-61 | LPC-2 |
| PTMA           | 9.24E-65 | 0.426102 | 1     | 0.996 | 1.68E-60 | LPC-2 |
| RPL23          | 2.32E-64 | 0.322094 | 1     | 0.984 | 4.23E-60 | LPC-2 |
| NACA           | 2.58E-64 | 0.287793 | 1     | 0.996 | 4.69E-60 | LPC-2 |
| HSP90AB1       | 1.05E-63 | 0.36064  | 0.987 | 0.963 | 1.91E-59 | LPC-2 |
| RPL35          | 2.30E-63 | 0.2772   | 1     | 0.999 | 4.20E-59 | LPC-2 |
| RPS21          | 2.93E-63 | 0.332027 | 1     | 0.989 | 5.33E-59 | LPC-2 |
| DEGS1          | 3.87E-63 | 0.59338  | 0.646 | 0.371 | 7.05E-59 | LPC-2 |
| RPL36A         | 4.88E-63 | 0.349468 | 0.994 | 0.989 | 8.88E-59 | LPC-2 |
| ENSG0000019876 | 6.58E-63 | 0.410274 | 0.993 | 0.983 | 1.20E-58 | LPC-2 |
| RPS2           | 6.55E-62 | 0.296934 | 1     | 0.997 | 1.19E-57 | LPC-2 |
| TPT1           | 2.99E-61 | 0.295065 | 1     | 0.997 | 5.44E-57 | LPC-2 |
| WNT10A         | 1.18E-58 | 0.312216 | 0.348 | 0.118 | 2.14E-54 | LPC-2 |
| BTF3           | 1.57E-58 | 0.29729  | 1     | 0.993 | 2.87E-54 | LPC-2 |
| RPL9           | 2.00E-57 | 0.488701 | 0.904 | 0.783 | 3.64E-53 | LPC-2 |
| JUN            | 4.80E-57 | 0.730839 | 0.994 | 0.978 | 8.75E-53 | LPC-2 |
| LMNA           | 1.05E-56 | 0.488116 | 0.989 | 0.966 | 1.92E-52 | LPC-2 |
| RGS2           | 3.00E-56 | 0.437363 | 0.525 | 0.271 | 5.46E-52 | LPC-2 |
| ID2            | 4.99E-56 | 0.952556 | 0.762 | 0.553 | 9.08E-52 | LPC-2 |
| ENSG0000019888 | 8.85E-56 | 0.41916  | 0.991 | 0.959 | 1.61E-51 | LPC-2 |

|              |          |          |       |       |          |       |
|--------------|----------|----------|-------|-------|----------|-------|
| MYC          | 9.01E-56 | 0.525317 | 0.781 | 0.559 | 1.64E-51 | LPC-2 |
| NFKBIA       | 2.71E-55 | 0.536608 | 0.963 | 0.942 | 4.94E-51 | LPC-2 |
| HSPA2        | 3.07E-55 | 0.504409 | 0.645 | 0.4   | 5.60E-51 | LPC-2 |
| SNAI2        | 3.53E-54 | 0.5021   | 0.61  | 0.353 | 6.43E-50 | LPC-2 |
| SNHG8        | 4.48E-54 | 0.511717 | 0.845 | 0.696 | 8.17E-50 | LPC-2 |
| SERTAD4      | 1.63E-53 | 0.34606  | 0.278 | 0.091 | 2.97E-49 | LPC-2 |
| FBL          | 2.24E-53 | 0.4825   | 0.718 | 0.546 | 4.09E-49 | LPC-2 |
| LAMB3        | 1.71E-52 | 0.446144 | 0.512 | 0.26  | 3.11E-48 | LPC-2 |
| IER3         | 1.98E-52 | 0.542764 | 0.915 | 0.829 | 3.61E-48 | LPC-2 |
| KRT17        | 1.03E-51 | 0.698818 | 0.669 | 0.414 | 1.88E-47 | LPC-2 |
| DUSP6        | 2.46E-51 | 0.424211 | 0.433 | 0.202 | 4.47E-47 | LPC-2 |
| MSS51        | 3.41E-51 | 0.321692 | 0.994 | 0.979 | 6.20E-47 | LPC-2 |
| PTRF         | 5.27E-51 | 0.336363 | 0.757 | 0.445 | 9.60E-47 | LPC-2 |
| ZFP36        | 1.16E-50 | 0.511473 | 0.991 | 0.975 | 2.11E-46 | LPC-2 |
| FHL2         | 1.50E-50 | 0.425475 | 0.608 | 0.36  | 2.73E-46 | LPC-2 |
| EIF3L        | 5.44E-50 | 0.446861 | 0.906 | 0.815 | 9.90E-46 | LPC-2 |
| PLK2         | 1.44E-49 | 0.518163 | 0.755 | 0.524 | 2.61E-45 | LPC-2 |
| EPB41L4A-AS1 | 2.04E-49 | 0.46925  | 0.705 | 0.519 | 3.72E-45 | LPC-2 |
| SNORA33      | 2.73E-48 | 0.401189 | 0.866 | 0.764 | 4.97E-44 | LPC-2 |
| RPL38        | 7.49E-48 | 0.286845 | 0.996 | 0.989 | 1.36E-43 | LPC-2 |
| COL17A1      | 3.01E-47 | 0.430358 | 0.744 | 0.479 | 5.48E-43 | LPC-2 |
| ZFP36L2      | 9.35E-47 | 0.5063   | 0.72  | 0.516 | 1.70E-42 | LPC-2 |
| GPHA2        | 1.68E-45 | 0.274404 | 0.274 | 0.097 | 3.05E-41 | LPC-2 |
| PPP1R15A     | 1.98E-45 | 0.412045 | 0.967 | 0.915 | 3.61E-41 | LPC-2 |
| SPATS2       | 3.82E-45 | 0.345938 | 0.346 | 0.148 | 6.96E-41 | LPC-2 |
| UBA52        | 1.47E-44 | 0.250111 | 0.998 | 0.987 | 2.68E-40 | LPC-2 |
| PFDN5        | 1.73E-44 | 0.334908 | 0.982 | 0.974 | 3.14E-40 | LPC-2 |
| PABPC1       | 4.20E-43 | 0.473866 | 0.947 | 0.901 | 7.65E-39 | LPC-2 |
| EDN1         | 9.37E-43 | 0.407176 | 0.341 | 0.144 | 1.71E-38 | LPC-2 |
| DUSP1        | 6.37E-42 | 0.413359 | 0.985 | 0.988 | 1.16E-37 | LPC-2 |
| LGALS3BP     | 1.92E-41 | 0.435493 | 0.681 | 0.499 | 3.50E-37 | LPC-2 |
| RAB4A        | 5.51E-41 | 0.357876 | 0.843 | 0.734 | 1.00E-36 | LPC-2 |
| SNHG6        | 6.01E-41 | 0.371881 | 0.862 | 0.757 | 1.09E-36 | LPC-2 |
| AVPI1        | 6.64E-41 | 0.440331 | 0.694 | 0.525 | 1.21E-36 | LPC-2 |
| ATF3         | 7.43E-40 | 0.455153 | 0.86  | 0.695 | 1.35E-35 | LPC-2 |
| SGK1         | 7.82E-39 | 0.575529 | 0.808 | 0.707 | 1.42E-34 | LPC-2 |
| PMAIP1       | 1.06E-38 | 0.480188 | 0.869 | 0.7   | 1.92E-34 | LPC-2 |
| MALAT1       | 1.37E-38 | 0.329264 | 0.998 | 0.998 | 2.50E-34 | LPC-2 |
| EPAS1        | 2.07E-38 | 0.388639 | 0.506 | 0.3   | 3.77E-34 | LPC-2 |
| KRT8         | 3.50E-38 | 0.408049 | 0.622 | 0.39  | 6.37E-34 | LPC-2 |
| TRA2B        | 1.07E-37 | 0.378893 | 0.86  | 0.792 | 1.95E-33 | LPC-2 |
| GLCE         | 3.39E-37 | 0.371253 | 0.42  | 0.224 | 6.17E-33 | LPC-2 |
| CAV2         | 1.35E-36 | 0.405936 | 0.471 | 0.277 | 2.46E-32 | LPC-2 |
| CDH13        | 1.38E-36 | 0.287455 | 0.319 | 0.138 | 2.52E-32 | LPC-2 |
| ARL4A        | 2.97E-36 | 0.438483 | 0.779 | 0.611 | 5.41E-32 | LPC-2 |
| TXNIP        | 1.55E-35 | 0.772578 | 0.757 | 0.674 | 2.81E-31 | LPC-2 |
| SNHG5        | 4.72E-35 | 0.309851 | 0.95  | 0.917 | 8.59E-31 | LPC-2 |
| RPS14P3      | 8.05E-35 | 0.291655 | 0.98  | 0.961 | 1.47E-30 | LPC-2 |



|          |          |          |       |       |          |       |
|----------|----------|----------|-------|-------|----------|-------|
| C6orf48  | 9.78E-35 | 0.398152 | 0.773 | 0.647 | 1.78E-30 | LPC-2 |
| SOCS3    | 2.80E-34 | 0.444335 | 0.534 | 0.326 | 5.10E-30 | LPC-2 |
| EEF1B2   | 4.48E-34 | 0.303123 | 0.943 | 0.902 | 8.16E-30 | LPC-2 |
| RSL24D1  | 1.34E-33 | 0.353083 | 0.775 | 0.665 | 2.44E-29 | LPC-2 |
| COMMD6   | 1.37E-33 | 0.298248 | 0.95  | 0.925 | 2.50E-29 | LPC-2 |
| NTRK2    | 1.68E-33 | 0.410619 | 0.512 | 0.295 | 3.06E-29 | LPC-2 |
| SLC3A2   | 2.18E-33 | 0.377202 | 0.827 | 0.787 | 3.96E-29 | LPC-2 |
| EFEMP1   | 3.43E-33 | 0.352499 | 0.508 | 0.308 | 6.25E-29 | LPC-2 |
| JUNB     | 3.68E-33 | 0.376882 | 0.994 | 0.996 | 6.70E-29 | LPC-2 |
| EEF2     | 4.90E-33 | 0.413012 | 0.908 | 0.873 | 8.92E-29 | LPC-2 |
| HNRNPA0  | 7.68E-33 | 0.284903 | 0.904 | 0.874 | 1.40E-28 | LPC-2 |
| PLTP     | 2.12E-32 | 0.317039 | 0.28  | 0.123 | 3.85E-28 | LPC-2 |
| FOSB     | 3.35E-32 | 0.460686 | 0.906 | 0.829 | 6.11E-28 | LPC-2 |
| NCOA7    | 6.39E-32 | 0.467991 | 0.37  | 0.198 | 1.16E-27 | LPC-2 |
| HMG3     | 6.64E-32 | 0.299463 | 0.971 | 0.929 | 1.21E-27 | LPC-2 |
| ZNF503   | 1.19E-31 | 0.311556 | 0.379 | 0.199 | 2.16E-27 | LPC-2 |
| L32131   | 8.81E-31 | 0.339167 | 0.829 | 0.742 | 1.60E-26 | LPC-2 |
| IVNS1ABP | 9.25E-31 | 0.364388 | 0.626 | 0.454 | 1.68E-26 | LPC-2 |
| C12orf57 | 6.71E-30 | 0.349141 | 0.816 | 0.74  | 1.22E-25 | LPC-2 |
| PNRC1    | 1.06E-29 | 0.29811  | 0.908 | 0.866 | 1.92E-25 | LPC-2 |
| KLF4     | 1.17E-29 | 0.445131 | 0.952 | 0.916 | 2.14E-25 | LPC-2 |
| CXCL2    | 3.23E-29 | 0.317553 | 0.427 | 0.228 | 5.88E-25 | LPC-2 |
| BOC      | 3.91E-28 | 0.303676 | 0.346 | 0.183 | 7.12E-24 | LPC-2 |
| IMPA2    | 6.76E-28 | 0.286615 | 0.46  | 0.281 | 1.23E-23 | LPC-2 |
| NFIB     | 1.00E-27 | 0.34963  | 0.313 | 0.162 | 1.83E-23 | LPC-2 |
| HOPX     | 1.68E-27 | 0.375886 | 0.737 | 0.556 | 3.07E-23 | LPC-2 |
| HNRPDL   | 3.71E-27 | 0.270443 | 0.928 | 0.912 | 6.75E-23 | LPC-2 |
| ESD      | 1.28E-26 | 0.315226 | 0.659 | 0.53  | 2.32E-22 | LPC-2 |
| SYNE2    | 1.25E-25 | 0.372359 | 0.538 | 0.384 | 2.27E-21 | LPC-2 |
| APP      | 3.36E-25 | 0.313821 | 0.716 | 0.562 | 6.12E-21 | LPC-2 |
| IGFBP7   | 4.83E-25 | 0.286623 | 0.869 | 0.651 | 8.79E-21 | LPC-2 |
| OAT      | 2.50E-24 | 0.306901 | 0.534 | 0.377 | 4.54E-20 | LPC-2 |
| EIF4A2   | 2.58E-23 | 0.358102 | 0.923 | 0.902 | 4.69E-19 | LPC-2 |
| ZC3H12A  | 1.02E-22 | 0.31557  | 0.418 | 0.264 | 1.85E-18 | LPC-2 |
| FCGRT    | 3.03E-22 | 0.252183 | 0.462 | 0.306 | 5.51E-18 | LPC-2 |
| NFIC     | 4.31E-22 | 0.297223 | 0.534 | 0.398 | 7.85E-18 | LPC-2 |
| CCNI     | 1.00E-21 | 0.305232 | 0.672 | 0.537 | 1.82E-17 | LPC-2 |
| PTMS     | 2.83E-21 | 0.29307  | 0.654 | 0.538 | 5.16E-17 | LPC-2 |
| SNHG7    | 6.16E-21 | 0.301263 | 0.687 | 0.596 | 1.12E-16 | LPC-2 |
| ATF4     | 6.17E-21 | 0.269088 | 0.786 | 0.731 | 1.12E-16 | LPC-2 |
| POLR1D   | 9.82E-21 | 0.253022 | 0.902 | 0.827 | 1.79E-16 | LPC-2 |
| NCL      | 2.61E-19 | 0.253263 | 0.84  | 0.808 | 4.76E-15 | LPC-2 |
| RSL1D1   | 1.01E-18 | 0.315351 | 0.727 | 0.687 | 1.85E-14 | LPC-2 |
| MARCKSL1 | 7.39E-18 | 0.250232 | 0.392 | 0.245 | 1.34E-13 | LPC-2 |
| LUZP1    | 2.25E-17 | 0.258175 | 0.394 | 0.267 | 4.10E-13 | LPC-2 |
| CFI      | 3.38E-17 | 0.252018 | 0.378 | 0.251 | 6.16E-13 | LPC-2 |
| FAM134B  | 1.60E-16 | 0.251281 | 0.429 | 0.305 | 2.91E-12 | LPC-2 |
| MYLIP    | 4.39E-16 | 0.25401  | 0.473 | 0.348 | 8.00E-12 | LPC-2 |

|           |          |          |       |       |          |        |
|-----------|----------|----------|-------|-------|----------|--------|
| IGFBP3    | 3.65E-15 | 0.523832 | 0.337 | 0.204 | 6.65E-11 | LPC-2  |
| H1FX      | 2.04E-14 | 0.314405 | 0.51  | 0.42  | 3.72E-10 | LPC-2  |
| IMPDH2    | 1.22E-13 | 0.254424 | 0.549 | 0.464 | 2.22E-09 | LPC-2  |
| AES       | 2.06E-13 | 0.252281 | 0.692 | 0.643 | 3.76E-09 | LPC-2  |
| IFRD1     | 2.15E-12 | 0.281517 | 0.492 | 0.409 | 3.92E-08 | LPC-2  |
| TGIF1     | 1.32E-11 | 0.276038 | 0.696 | 0.676 | 2.41E-07 | LPC-2  |
| IRF1      | 2.83E-11 | 0.271425 | 0.471 | 0.375 | 5.15E-07 | LPC-2  |
| TUBA1A    | 8.83E-11 | 0.283444 | 0.731 | 0.709 | 1.61E-06 | LPC-2  |
| KLF10     | 3.15E-10 | 0.321699 | 0.687 | 0.672 | 5.74E-06 | LPC-2  |
| HIST1H1C  | 1.18E-09 | 0.273818 | 0.308 | 0.223 | 2.14E-05 | LPC-2  |
| ID3       | 3.45E-09 | 0.354329 | 0.803 | 0.759 | 6.28E-05 | LPC-2  |
| C1orf63   | 5.62E-09 | 0.260862 | 0.565 | 0.512 | 0.000102 | LPC-2  |
| SOX4      | 1.81E-06 | 0.260852 | 0.431 | 0.381 | 0.032934 | LPC-2  |
| TNFRSF12A | 1.91E-06 | 0.331737 | 0.435 | 0.384 | 0.034817 | LPC-2  |
| PLAU      | 5.39E-06 | 0.366659 | 0.516 | 0.497 | 0.09813  | LPC-2  |
| PLAUR     | 0.00017  | 0.421957 | 0.339 | 0.289 | 1        | LPC-2  |
| UBE2C     | 0        | 1.740535 | 0.755 | 0.008 | 0        | Epi-B1 |
| BIRC5     | 0        | 1.317444 | 0.826 | 0.007 | 0        | Epi-B1 |
| TK1       | 0        | 1.237067 | 0.809 | 0.015 | 0        | Epi-B1 |
| CCNB1     | 0        | 1.230135 | 0.574 | 0.024 | 0        | Epi-B1 |
| NUSAP1    | 0        | 1.213074 | 0.809 | 0.008 | 0        | Epi-B1 |
| CDK1      | 0        | 1.130723 | 0.723 | 0.005 | 0        | Epi-B1 |
| SMC4      | 0        | 1.065916 | 0.869 | 0.13  | 0        | Epi-B1 |
| CDC20     | 0        | 1.056098 | 0.613 | 0.011 | 0        | Epi-B1 |
| CCNB2     | 0        | 1.053725 | 0.713 | 0.008 | 0        | Epi-B1 |
| PBK       | 0        | 1.000525 | 0.766 | 0.001 | 0        | Epi-B1 |
| MAD2L1    | 0        | 0.985833 | 0.833 | 0.035 | 0        | Epi-B1 |
| CENPF     | 0        | 0.98198  | 0.663 | 0.005 | 0        | Epi-B1 |
| CENPW     | 0        | 0.971194 | 0.872 | 0.07  | 0        | Epi-B1 |
| TOP2A     | 0        | 0.904319 | 0.621 | 0.006 | 0        | Epi-B1 |
| ZWINT     | 0        | 0.902055 | 0.833 | 0.036 | 0        | Epi-B1 |
| CDKN3     | 0        | 0.892885 | 0.677 | 0.009 | 0        | Epi-B1 |
| UBE2T     | 0        | 0.839756 | 0.798 | 0.099 | 0        | Epi-B1 |
| RRM2      | 0        | 0.787001 | 0.454 | 0.003 | 0        | Epi-B1 |
| PRC1      | 0        | 0.783337 | 0.691 | 0.024 | 0        | Epi-B1 |
| MKI67     | 0        | 0.702095 | 0.624 | 0.002 | 0        | Epi-B1 |
| HMMR      | 0        | 0.686566 | 0.585 | 0.005 | 0        | Epi-B1 |
| SGOL1     | 0        | 0.6764   | 0.67  | 0.006 | 0        | Epi-B1 |
| CENPA     | 0        | 0.668042 | 0.479 | 0.006 | 0        | Epi-B1 |
| TYMS      | 0        | 0.659033 | 0.504 | 0.011 | 0        | Epi-B1 |
| TPX2      | 0        | 0.627217 | 0.574 | 0.005 | 0        | Epi-B1 |
| NUF2      | 0        | 0.598865 | 0.624 | 0.004 | 0        | Epi-B1 |
| CKAP2L    | 0        | 0.541472 | 0.585 | 0.005 | 0        | Epi-B1 |
| AURKA     | 0        | 0.540103 | 0.415 | 0.016 | 0        | Epi-B1 |
| CENPK     | 0        | 0.536608 | 0.603 | 0.01  | 0        | Epi-B1 |
| ASF1B     | 0        | 0.52536  | 0.571 | 0.009 | 0        | Epi-B1 |
| KIF23     | 0        | 0.518191 | 0.504 | 0.006 | 0        | Epi-B1 |
| PLK1      | 0        | 0.51816  | 0.408 | 0.004 | 0        | Epi-B1 |

|           |           |          |       |       |           |        |
|-----------|-----------|----------|-------|-------|-----------|--------|
| RAD51AP1  | 0         | 0.517953 | 0.539 | 0.014 | 0         | Epi-B1 |
| KIFC1     | 0         | 0.516006 | 0.528 | 0.006 | 0         | Epi-B1 |
| AURKB     | 0         | 0.515446 | 0.5   | 0.002 | 0         | Epi-B1 |
| CCNA2     | 0         | 0.49794  | 0.5   | 0.001 | 0         | Epi-B1 |
| ASPM      | 0         | 0.478081 | 0.429 | 0.001 | 0         | Epi-B1 |
| CDCA8     | 0         | 0.475258 | 0.482 | 0.015 | 0         | Epi-B1 |
| CENPM     | 0         | 0.4589   | 0.468 | 0.012 | 0         | Epi-B1 |
| OIP5      | 0         | 0.445681 | 0.525 | 0.005 | 0         | Epi-B1 |
| NDC80     | 0         | 0.441372 | 0.507 | 0.003 | 0         | Epi-B1 |
| TACC3     | 0         | 0.440594 | 0.507 | 0.006 | 0         | Epi-B1 |
| ANLN      | 0         | 0.424124 | 0.436 | 0.004 | 0         | Epi-B1 |
| SGOL2     | 0         | 0.411404 | 0.436 | 0.019 | 0         | Epi-B1 |
| SPC25     | 0         | 0.400438 | 0.436 | 0.001 | 0         | Epi-B1 |
| CDCA3     | 0         | 0.399613 | 0.447 | 0.008 | 0         | Epi-B1 |
| GINS2     | 0         | 0.39832  | 0.387 | 0.017 | 0         | Epi-B1 |
| TROAP     | 0         | 0.390622 | 0.408 | 0.003 | 0         | Epi-B1 |
| POC1A     | 0         | 0.381238 | 0.447 | 0.014 | 0         | Epi-B1 |
| CENPE     | 0         | 0.381176 | 0.358 | 0.008 | 0         | Epi-B1 |
| MND1      | 0         | 0.374321 | 0.475 | 0.003 | 0         | Epi-B1 |
| NEK2      | 0         | 0.371799 | 0.365 | 0.002 | 0         | Epi-B1 |
| DEPDC1    | 0         | 0.342754 | 0.379 | 0.001 | 0         | Epi-B1 |
| HJURP     | 0         | 0.336151 | 0.383 | 0.001 | 0         | Epi-B1 |
| RAD51     | 0         | 0.315665 | 0.369 | 0.009 | 0         | Epi-B1 |
| DLGAP5    | 0         | 0.308411 | 0.348 | 0.001 | 0         | Epi-B1 |
| KIF2C     | 0         | 0.300708 | 0.309 | 0.001 | 0         | Epi-B1 |
| FAM64A    | 0         | 0.294811 | 0.362 | 0.002 | 0         | Epi-B1 |
| CEP55     | 0         | 0.292836 | 0.362 | 0.002 | 0         | Epi-B1 |
| CLSPN     | 0         | 0.290436 | 0.312 | 0.005 | 0         | Epi-B1 |
| TTK       | 0         | 0.290209 | 0.376 | 0.003 | 0         | Epi-B1 |
| CDCA5     | 0         | 0.281789 | 0.369 | 0.004 | 0         | Epi-B1 |
| MELK      | 0         | 0.281104 | 0.358 | 0.002 | 0         | Epi-B1 |
| GTSE1     | 0         | 0.273224 | 0.344 | 0.002 | 0         | Epi-B1 |
| ARHGAP11A | 0         | 0.269046 | 0.319 | 0.005 | 0         | Epi-B1 |
| PRR11     | 0         | 0.266118 | 0.305 | 0.01  | 0         | Epi-B1 |
| KIF4A     | 0         | 0.264372 | 0.33  | 0.003 | 0         | Epi-B1 |
| DIAPH3    | 0         | 0.254144 | 0.301 | 0.005 | 0         | Epi-B1 |
| CENPN     | 1.45E-306 | 0.387756 | 0.507 | 0.037 | 2.64E-302 | Epi-B1 |
| STMN1     | 1.87E-304 | 1.938922 | 0.961 | 0.194 | 3.41E-300 | Epi-B1 |
| KIAA0101  | 8.56E-302 | 1.033035 | 0.649 | 0.069 | 1.56E-297 | Epi-B1 |
| ORC6      | 1.03E-296 | 0.276017 | 0.376 | 0.02  | 1.88E-292 | Epi-B1 |
| CCDC34    | 1.45E-284 | 0.586406 | 0.592 | 0.057 | 2.64E-280 | Epi-B1 |
| KIF20B    | 1.28E-278 | 0.707859 | 0.681 | 0.079 | 2.33E-274 | Epi-B1 |
| SMC2      | 2.23E-261 | 0.678271 | 0.78  | 0.113 | 4.07E-257 | Epi-B1 |
| FAM83D    | 1.04E-245 | 0.40816  | 0.401 | 0.029 | 1.90E-241 | Epi-B1 |
| PHF19     | 9.40E-223 | 0.27617  | 0.372 | 0.027 | 1.71E-218 | Epi-B1 |
| FBXO5     | 4.19E-220 | 0.310608 | 0.411 | 0.034 | 7.63E-216 | Epi-B1 |
| CDC25B    | 1.05E-219 | 0.35785  | 0.454 | 0.042 | 1.92E-215 | Epi-B1 |
| RACGAP1   | 6.30E-219 | 0.330321 | 0.376 | 0.028 | 1.15E-214 | Epi-B1 |

|          |           |          |       |       |           |        |
|----------|-----------|----------|-------|-------|-----------|--------|
| RMI2     | 5.30E-211 | 0.253335 | 0.344 | 0.025 | 9.66E-207 | Epi-B1 |
| ECT2     | 6.49E-208 | 0.276182 | 0.323 | 0.022 | 1.18E-203 | Epi-B1 |
| MLF1IP   | 1.37E-201 | 0.766787 | 0.762 | 0.142 | 2.49E-197 | Epi-B1 |
| CENPH    | 5.23E-199 | 0.611652 | 0.642 | 0.098 | 9.52E-195 | Epi-B1 |
| PTTG1    | 1.02E-185 | 1.556806 | 0.965 | 0.378 | 1.86E-181 | Epi-B1 |
| CKS2     | 5.91E-181 | 1.596012 | 0.933 | 0.327 | 1.08E-176 | Epi-B1 |
| HMGB2    | 1.59E-172 | 1.720944 | 0.965 | 0.449 | 2.89E-168 | Epi-B1 |
| ATAD2    | 3.15E-169 | 0.268904 | 0.355 | 0.033 | 5.74E-165 | Epi-B1 |
| VRK1     | 4.49E-167 | 0.52056  | 0.674 | 0.122 | 8.18E-163 | Epi-B1 |
| HELLS    | 3.43E-163 | 0.252676 | 0.316 | 0.027 | 6.24E-159 | Epi-B1 |
| HYLS1    | 7.90E-157 | 0.293265 | 0.401 | 0.045 | 1.44E-152 | Epi-B1 |
| H2AFZ    | 3.72E-154 | 1.425429 | 0.996 | 0.895 | 6.78E-150 | Epi-B1 |
| CKAP2    | 8.94E-154 | 0.442771 | 0.5   | 0.073 | 1.63E-149 | Epi-B1 |
| LMNB1    | 1.25E-148 | 0.278432 | 0.397 | 0.046 | 2.28E-144 | Epi-B1 |
| HMGB1    | 6.78E-145 | 0.973745 | 1     | 0.982 | 1.23E-140 | Epi-B1 |
| FEN1     | 2.55E-139 | 0.511187 | 0.599 | 0.113 | 4.64E-135 | Epi-B1 |
| TMPO     | 2.59E-138 | 0.394544 | 0.56  | 0.096 | 4.72E-134 | Epi-B1 |
| GGH      | 8.66E-136 | 0.780621 | 0.883 | 0.283 | 1.58E-131 | Epi-B1 |
| CKS1B    | 6.01E-133 | 1.028157 | 0.947 | 0.519 | 1.09E-128 | Epi-B1 |
| DHFR     | 1.89E-122 | 0.275131 | 0.344 | 0.042 | 3.44E-118 | Epi-B1 |
| CDCA4    | 7.79E-122 | 0.685366 | 0.738 | 0.209 | 1.42E-117 | Epi-B1 |
| RNASEH2A | 5.32E-117 | 0.431374 | 0.571 | 0.117 | 9.69E-113 | Epi-B1 |
| RRM1     | 2.36E-115 | 0.599963 | 0.713 | 0.19  | 4.30E-111 | Epi-B1 |
| GMNN     | 8.44E-114 | 0.452604 | 0.56  | 0.117 | 1.54E-109 | Epi-B1 |
| KNSTRN   | 3.47E-112 | 0.316124 | 0.351 | 0.048 | 6.31E-108 | Epi-B1 |
| NMU      | 1.29E-110 | 0.768136 | 0.798 | 0.261 | 2.35E-106 | Epi-B1 |
| BCL2L12  | 5.57E-110 | 0.314594 | 0.514 | 0.096 | 1.01E-105 | Epi-B1 |
| RFC4     | 6.56E-109 | 0.279864 | 0.443 | 0.073 | 1.19E-104 | Epi-B1 |
| TUBB     | 1.51E-105 | 1.358502 | 0.982 | 0.826 | 2.75E-101 | Epi-B1 |
| HMGB3    | 2.24E-101 | 0.39694  | 0.525 | 0.112 | 4.09E-97  | Epi-B1 |
| NUDT1    | 1.28E-100 | 0.448499 | 0.716 | 0.197 | 2.33E-96  | Epi-B1 |
| HMG2     | 4.04E-98  | 0.911328 | 0.996 | 0.847 | 7.35E-94  | Epi-B1 |
| CHAF1A   | 5.24E-98  | 0.262086 | 0.358 | 0.054 | 9.53E-94  | Epi-B1 |
| RPL39L   | 1.19E-97  | 0.384504 | 0.571 | 0.131 | 2.16E-93  | Epi-B1 |
| KRT14    | 6.06E-97  | 1.329275 | 0.968 | 0.573 | 1.10E-92  | Epi-B1 |
| DNAJC9   | 3.09E-96  | 0.587579 | 0.784 | 0.274 | 5.63E-92  | Epi-B1 |
| CAV1     | 1.23E-95  | 0.67036  | 0.794 | 0.255 | 2.23E-91  | Epi-B1 |
| MCM7     | 1.38E-95  | 0.450859 | 0.518 | 0.116 | 2.51E-91  | Epi-B1 |
| DEK      | 3.10E-95  | 0.721789 | 0.929 | 0.478 | 5.65E-91  | Epi-B1 |
| S100A2   | 9.62E-95  | 1.149985 | 0.922 | 0.422 | 1.75E-90  | Epi-B1 |
| H2AFV    | 9.90E-95  | 0.720772 | 0.947 | 0.533 | 1.80E-90  | Epi-B1 |
| SKA2     | 1.49E-93  | 0.491927 | 0.741 | 0.234 | 2.72E-89  | Epi-B1 |
| ITGB3BP  | 1.54E-93  | 0.432928 | 0.635 | 0.166 | 2.81E-89  | Epi-B1 |
| UBE2S    | 5.12E-93  | 0.610748 | 0.684 | 0.211 | 9.31E-89  | Epi-B1 |
| BASP1    | 7.66E-91  | 0.376004 | 0.408 | 0.076 | 1.40E-86  | Epi-B1 |
| GPSM2    | 3.99E-90  | 0.374031 | 0.443 | 0.088 | 7.27E-86  | Epi-B1 |
| GAPDH    | 1.99E-88  | 0.611511 | 1     | 0.998 | 3.62E-84  | Epi-B1 |
| MIS18A   | 3.08E-88  | 0.306689 | 0.521 | 0.115 | 5.61E-84  | Epi-B1 |

|           |          |          |       |       |          |        |
|-----------|----------|----------|-------|-------|----------|--------|
| KPNA2     | 2.98E-86 | 1.066989 | 0.745 | 0.28  | 5.43E-82 | Epi-B1 |
| HNRNPA1   | 1.24E-85 | 0.640092 | 0.996 | 0.969 | 2.26E-81 | Epi-B1 |
| HNRNPA2B1 | 1.98E-85 | 0.613922 | 0.993 | 0.957 | 3.60E-81 | Epi-B1 |
| PHGDH     | 2.30E-85 | 0.664052 | 0.869 | 0.379 | 4.19E-81 | Epi-B1 |
| MOXD1     | 6.61E-85 | 0.505217 | 0.628 | 0.171 | 1.20E-80 | Epi-B1 |
| C19orf48  | 8.06E-83 | 0.427542 | 0.642 | 0.186 | 1.47E-78 | Epi-B1 |
| TNNT1     | 9.86E-82 | 0.318786 | 0.404 | 0.079 | 1.79E-77 | Epi-B1 |
| TUBA1A    | 3.93E-81 | 0.904596 | 0.954 | 0.706 | 7.16E-77 | Epi-B1 |
| CPVL      | 2.90E-80 | 0.605044 | 0.638 | 0.186 | 5.28E-76 | Epi-B1 |
| MIS18BP1  | 3.26E-79 | 0.295824 | 0.454 | 0.1   | 5.93E-75 | Epi-B1 |
| CENPQ     | 7.17E-79 | 0.260983 | 0.443 | 0.094 | 1.31E-74 | Epi-B1 |
| BCAM      | 2.16E-78 | 0.656958 | 0.83  | 0.323 | 3.93E-74 | Epi-B1 |
| IMPA2     | 8.69E-73 | 0.452416 | 0.77  | 0.278 | 1.58E-68 | Epi-B1 |
| CRLF1     | 1.81E-72 | 0.341536 | 0.493 | 0.122 | 3.30E-68 | Epi-B1 |
| LSM5      | 6.46E-72 | 0.582917 | 0.972 | 0.754 | 1.18E-67 | Epi-B1 |
| MZT2A     | 1.26E-71 | 0.53826  | 0.844 | 0.391 | 2.29E-67 | Epi-B1 |
| APITD1    | 4.87E-69 | 0.286571 | 0.465 | 0.114 | 8.87E-65 | Epi-B1 |
| HIST1H4C  | 3.95E-68 | 0.954253 | 0.688 | 0.284 | 7.19E-64 | Epi-B1 |
| CKLF      | 4.24E-66 | 0.520519 | 0.759 | 0.308 | 7.72E-62 | Epi-B1 |
| RAN       | 2.37E-65 | 0.502593 | 0.996 | 0.871 | 4.32E-61 | Epi-B1 |
| HNRNPA3   | 7.32E-65 | 0.542119 | 0.972 | 0.803 | 1.33E-60 | Epi-B1 |
| BUB3      | 7.40E-65 | 0.642567 | 0.883 | 0.511 | 1.35E-60 | Epi-B1 |
| RAD21     | 2.88E-64 | 0.501551 | 0.812 | 0.36  | 5.25E-60 | Epi-B1 |
| PLP2      | 5.28E-64 | 0.49973  | 1     | 0.897 | 9.62E-60 | Epi-B1 |
| ANP32B    | 1.15E-63 | 0.601701 | 0.961 | 0.734 | 2.09E-59 | Epi-B1 |
| ARL6IP1   | 3.26E-63 | 1.092666 | 0.954 | 0.776 | 5.93E-59 | Epi-B1 |
| PTN       | 2.41E-62 | 0.385013 | 0.39  | 0.09  | 4.39E-58 | Epi-B1 |
| RAD51C    | 1.83E-61 | 0.35707  | 0.628 | 0.209 | 3.33E-57 | Epi-B1 |
| PTMS      | 2.89E-61 | 0.712543 | 0.879 | 0.536 | 5.25E-57 | Epi-B1 |
| CDKN2C    | 3.71E-60 | 0.328097 | 0.528 | 0.157 | 6.75E-56 | Epi-B1 |
| MT2A      | 8.33E-60 | 0.612499 | 0.996 | 0.899 | 1.52E-55 | Epi-B1 |
| MZT1      | 1.61E-59 | 0.359467 | 0.677 | 0.243 | 2.92E-55 | Epi-B1 |
| NUCKS1    | 3.29E-59 | 0.5854   | 0.965 | 0.771 | 5.98E-55 | Epi-B1 |
| CXCL14    | 3.81E-59 | 0.803943 | 0.996 | 0.889 | 6.94E-55 | Epi-B1 |
| PTMA      | 1.73E-58 | 0.681146 | 1     | 0.996 | 3.15E-54 | Epi-B1 |
| MZT2B     | 1.80E-58 | 0.543577 | 0.95  | 0.697 | 3.28E-54 | Epi-B1 |
| HN1       | 1.01E-57 | 0.630115 | 0.908 | 0.574 | 1.85E-53 | Epi-B1 |
| ANP32E    | 2.18E-56 | 0.489598 | 0.706 | 0.306 | 3.98E-52 | Epi-B1 |
| CCDC109B  | 3.98E-55 | 0.405773 | 0.727 | 0.311 | 7.25E-51 | Epi-B1 |
| TGM2      | 7.85E-54 | 0.364266 | 0.582 | 0.195 | 1.43E-49 | Epi-B1 |
| NASP      | 1.79E-53 | 0.50622  | 0.766 | 0.367 | 3.27E-49 | Epi-B1 |
| RPA3      | 1.15E-52 | 0.628165 | 0.897 | 0.576 | 2.10E-48 | Epi-B1 |
| MTHFD2    | 3.75E-52 | 0.328048 | 0.56  | 0.184 | 6.83E-48 | Epi-B1 |
| COL17A1   | 2.10E-51 | 0.618467 | 0.869 | 0.482 | 3.82E-47 | Epi-B1 |
| H2AFX     | 3.35E-51 | 0.339478 | 0.582 | 0.204 | 6.10E-47 | Epi-B1 |
| YEATS4    | 1.07E-50 | 0.29168  | 0.564 | 0.19  | 1.94E-46 | Epi-B1 |
| VIT       | 2.03E-50 | 0.316334 | 0.514 | 0.164 | 3.69E-46 | Epi-B1 |
| LSM4      | 3.12E-50 | 0.473015 | 0.954 | 0.708 | 5.68E-46 | Epi-B1 |

|              |          |          |       |       |          |        |
|--------------|----------|----------|-------|-------|----------|--------|
| KIF22        | 1.18E-48 | 0.452961 | 0.801 | 0.402 | 2.15E-44 | Epi-B1 |
| RHNO1        | 1.35E-48 | 0.268493 | 0.532 | 0.175 | 2.46E-44 | Epi-B1 |
| MT1X         | 3.00E-48 | 0.620659 | 1     | 0.976 | 5.47E-44 | Epi-B1 |
| TUBG1        | 3.51E-48 | 0.326914 | 0.61  | 0.237 | 6.39E-44 | Epi-B1 |
| YWHAH        | 6.92E-48 | 0.481975 | 0.926 | 0.599 | 1.26E-43 | Epi-B1 |
| DDX39A       | 1.58E-47 | 0.365977 | 0.656 | 0.275 | 2.87E-43 | Epi-B1 |
| PCNA         | 4.51E-47 | 0.824229 | 0.826 | 0.523 | 8.22E-43 | Epi-B1 |
| KCNN4        | 9.91E-47 | 0.431047 | 0.748 | 0.349 | 1.81E-42 | Epi-B1 |
| S100A10      | 1.64E-46 | 0.469693 | 1     | 0.95  | 2.99E-42 | Epi-B1 |
| RDX          | 6.15E-46 | 0.457943 | 0.922 | 0.601 | 1.12E-41 | Epi-B1 |
| SNRPB        | 1.38E-45 | 0.42788  | 0.954 | 0.746 | 2.51E-41 | Epi-B1 |
| ATP1B3       | 2.55E-45 | 0.463345 | 0.972 | 0.822 | 4.64E-41 | Epi-B1 |
| RFC2         | 8.89E-45 | 0.315099 | 0.525 | 0.185 | 1.62E-40 | Epi-B1 |
| MRPL51       | 1.63E-44 | 0.398846 | 0.993 | 0.792 | 2.96E-40 | Epi-B1 |
| CALM3        | 3.01E-44 | 0.462693 | 0.844 | 0.496 | 5.47E-40 | Epi-B1 |
| TAGLN2       | 7.65E-44 | 0.401824 | 1     | 0.955 | 1.39E-39 | Epi-B1 |
| RANBP1       | 1.26E-43 | 0.499186 | 0.933 | 0.65  | 2.30E-39 | Epi-B1 |
| TMEM237      | 1.60E-42 | 0.260736 | 0.574 | 0.211 | 2.92E-38 | Epi-B1 |
| SAE1         | 3.39E-42 | 0.320158 | 0.706 | 0.298 | 6.16E-38 | Epi-B1 |
| CAV2         | 7.35E-41 | 0.31007  | 0.667 | 0.276 | 1.34E-36 | Epi-B1 |
| ILF2         | 1.07E-40 | 0.428458 | 0.911 | 0.683 | 1.95E-36 | Epi-B1 |
| PKM          | 1.19E-40 | 0.364805 | 1     | 0.98  | 2.17E-36 | Epi-B1 |
| LSM3         | 2.19E-40 | 0.375092 | 0.975 | 0.846 | 3.99E-36 | Epi-B1 |
| RUVBL2       | 2.69E-40 | 0.324792 | 0.684 | 0.304 | 4.90E-36 | Epi-B1 |
| IMMP1L       | 2.97E-40 | 0.348227 | 0.738 | 0.357 | 5.41E-36 | Epi-B1 |
| ZDHHC12      | 5.93E-40 | 0.356172 | 0.656 | 0.297 | 1.08E-35 | Epi-B1 |
| IVNS1ABP     | 9.06E-40 | 0.50841  | 0.794 | 0.454 | 1.65E-35 | Epi-B1 |
| PSIP1        | 1.41E-39 | 0.318669 | 0.621 | 0.255 | 2.57E-35 | Epi-B1 |
| SAC3D1       | 2.11E-39 | 0.261319 | 0.422 | 0.14  | 3.85E-35 | Epi-B1 |
| SNRPD1       | 2.57E-37 | 0.387196 | 0.933 | 0.707 | 4.68E-33 | Epi-B1 |
| TPGS2        | 2.77E-37 | 0.338068 | 0.738 | 0.361 | 5.04E-33 | Epi-B1 |
| NUP93        | 3.52E-37 | 0.37564  | 0.684 | 0.327 | 6.41E-33 | Epi-B1 |
| PXMP2        | 1.21E-36 | 0.266672 | 0.543 | 0.215 | 2.20E-32 | Epi-B1 |
| NUP37        | 5.24E-36 | 0.261354 | 0.55  | 0.221 | 9.53E-32 | Epi-B1 |
| LDHB         | 7.83E-36 | 0.44911  | 0.989 | 0.836 | 1.43E-31 | Epi-B1 |
| SMC3         | 1.14E-35 | 0.335177 | 0.784 | 0.419 | 2.08E-31 | Epi-B1 |
| ACAT2        | 1.50E-35 | 0.326016 | 0.66  | 0.312 | 2.74E-31 | Epi-B1 |
| SRSF3        | 2.42E-35 | 0.367944 | 0.989 | 0.914 | 4.41E-31 | Epi-B1 |
| TMEM106C     | 3.02E-35 | 0.332623 | 0.592 | 0.262 | 5.50E-31 | Epi-B1 |
| C17orf76-AS1 | 4.47E-35 | 0.359631 | 0.993 | 0.964 | 8.14E-31 | Epi-B1 |
| FBLN1        | 6.24E-35 | 0.285781 | 0.645 | 0.289 | 1.14E-30 | Epi-B1 |
| PPP1CA       | 1.48E-34 | 0.368856 | 0.965 | 0.782 | 2.69E-30 | Epi-B1 |
| MCM3         | 2.39E-34 | 0.250119 | 0.362 | 0.119 | 4.35E-30 | Epi-B1 |
| H2AFY        | 3.84E-34 | 0.406938 | 0.922 | 0.701 | 6.98E-30 | Epi-B1 |
| KCNJ3        | 4.73E-34 | 0.360321 | 0.908 | 0.622 | 8.61E-30 | Epi-B1 |
| RPS2         | 1.14E-33 | 0.286973 | 1     | 0.997 | 2.07E-29 | Epi-B1 |
| BTG3         | 1.99E-33 | 0.400427 | 0.876 | 0.552 | 3.62E-29 | Epi-B1 |
| IGFBP7       | 2.03E-33 | 0.466523 | 0.95  | 0.653 | 3.70E-29 | Epi-B1 |

|              |          |          |       |       |          |        |
|--------------|----------|----------|-------|-------|----------|--------|
| NTRK2        | 3.20E-33 | 0.377934 | 0.642 | 0.296 | 5.82E-29 | Epi-B1 |
| GGCT         | 6.70E-33 | 0.471658 | 0.872 | 0.573 | 1.22E-28 | Epi-B1 |
| PFN1         | 1.21E-32 | 0.311633 | 1     | 0.985 | 2.19E-28 | Epi-B1 |
| HP1BP3       | 1.71E-32 | 0.34797  | 0.844 | 0.493 | 3.11E-28 | Epi-B1 |
| RBBP7        | 4.00E-32 | 0.320164 | 0.837 | 0.499 | 7.29E-28 | Epi-B1 |
| RPSA         | 5.04E-32 | 0.369924 | 0.979 | 0.869 | 9.18E-28 | Epi-B1 |
| ALDH7A1      | 5.33E-32 | 0.389612 | 0.897 | 0.602 | 9.70E-28 | Epi-B1 |
| CLCA2        | 6.92E-32 | 0.350858 | 0.798 | 0.441 | 1.26E-27 | Epi-B1 |
| DUT          | 8.56E-32 | 0.521982 | 0.929 | 0.748 | 1.56E-27 | Epi-B1 |
| TUBB4B       | 9.48E-32 | 0.540731 | 0.986 | 0.921 | 1.73E-27 | Epi-B1 |
| CBX3         | 1.12E-31 | 0.345482 | 0.812 | 0.471 | 2.03E-27 | Epi-B1 |
| PAFAH1B3     | 1.77E-31 | 0.274069 | 0.628 | 0.281 | 3.22E-27 | Epi-B1 |
| HSP90B1      | 2.01E-31 | 0.490933 | 0.979 | 0.822 | 3.66E-27 | Epi-B1 |
| ACTG1        | 2.61E-31 | 0.31661  | 1     | 0.995 | 4.76E-27 | Epi-B1 |
| SLBP         | 3.05E-31 | 0.432788 | 0.784 | 0.492 | 5.56E-27 | Epi-B1 |
| GSN          | 3.61E-31 | 0.419671 | 0.993 | 0.905 | 6.57E-27 | Epi-B1 |
| EIF3F        | 3.63E-31 | 0.336095 | 0.961 | 0.77  | 6.61E-27 | Epi-B1 |
| LOC100505633 | 5.15E-31 | 0.262432 | 0.699 | 0.326 | 9.38E-27 | Epi-B1 |
| NAP1L1       | 5.97E-31 | 0.348069 | 0.943 | 0.732 | 1.09E-26 | Epi-B1 |
| LYAR         | 8.17E-31 | 0.284211 | 0.574 | 0.261 | 1.49E-26 | Epi-B1 |
| SPARC        | 9.88E-31 | 0.451355 | 0.809 | 0.447 | 1.80E-26 | Epi-B1 |
| MLF2         | 1.68E-30 | 0.358928 | 0.947 | 0.759 | 3.07E-26 | Epi-B1 |
| TMEM14A      | 1.48E-29 | 0.335973 | 0.823 | 0.505 | 2.69E-25 | Epi-B1 |
| CLIC1        | 1.94E-29 | 0.298323 | 0.993 | 0.912 | 3.53E-25 | Epi-B1 |
| GJB2         | 2.01E-29 | 0.445883 | 0.947 | 0.673 | 3.67E-25 | Epi-B1 |
| HNRNPR       | 3.61E-29 | 0.332057 | 0.887 | 0.639 | 6.57E-25 | Epi-B1 |
| BOLA3        | 3.93E-29 | 0.260468 | 0.681 | 0.332 | 7.15E-25 | Epi-B1 |
| HOMER3       | 1.20E-28 | 0.39014  | 0.745 | 0.423 | 2.19E-24 | Epi-B1 |
| RPS3         | 1.52E-28 | 0.252426 | 1     | 0.996 | 2.77E-24 | Epi-B1 |
| HNRNPD       | 3.03E-28 | 0.315615 | 0.823 | 0.518 | 5.51E-24 | Epi-B1 |
| ACTL6A       | 3.46E-28 | 0.269785 | 0.709 | 0.358 | 6.31E-24 | Epi-B1 |
| HNRPDL       | 6.82E-28 | 0.332158 | 0.982 | 0.911 | 1.24E-23 | Epi-B1 |
| RPLP0        | 1.76E-27 | 0.299553 | 1     | 0.992 | 3.21E-23 | Epi-B1 |
| TPRKB        | 2.78E-27 | 0.276844 | 0.787 | 0.451 | 5.06E-23 | Epi-B1 |
| HAT1         | 4.08E-27 | 0.262278 | 0.652 | 0.324 | 7.44E-23 | Epi-B1 |
| RASSF6       | 4.26E-27 | 0.323098 | 0.652 | 0.331 | 7.75E-23 | Epi-B1 |
| TPM4         | 4.70E-27 | 0.293803 | 0.823 | 0.487 | 8.56E-23 | Epi-B1 |
| CKAP4        | 5.34E-27 | 0.291864 | 0.773 | 0.435 | 9.72E-23 | Epi-B1 |
| NAP1L4       | 5.82E-27 | 0.289034 | 0.773 | 0.454 | 1.06E-22 | Epi-B1 |
| GJB6         | 6.44E-27 | 0.497472 | 0.922 | 0.62  | 1.17E-22 | Epi-B1 |
| POLE3        | 1.38E-26 | 0.303642 | 0.77  | 0.423 | 2.51E-22 | Epi-B1 |
| GSTO1        | 1.45E-26 | 0.317722 | 0.929 | 0.768 | 2.65E-22 | Epi-B1 |
| HMGN1        | 1.52E-26 | 0.301299 | 0.968 | 0.898 | 2.77E-22 | Epi-B1 |
| SLC7A8       | 1.89E-26 | 0.251465 | 0.539 | 0.244 | 3.44E-22 | Epi-B1 |
| CDV3         | 3.43E-26 | 0.253977 | 0.567 | 0.262 | 6.24E-22 | Epi-B1 |
| DDB2         | 3.46E-26 | 0.324251 | 0.667 | 0.358 | 6.31E-22 | Epi-B1 |
| SUMO2        | 3.99E-26 | 0.267578 | 1     | 0.967 | 7.27E-22 | Epi-B1 |
| HNRNPAB      | 6.31E-26 | 0.326421 | 0.816 | 0.519 | 1.15E-21 | Epi-B1 |

|           |          |          |       |       |          |        |
|-----------|----------|----------|-------|-------|----------|--------|
| MDH1      | 7.14E-26 | 0.31357  | 0.961 | 0.772 | 1.30E-21 | Epi-B1 |
| CCT5      | 8.50E-26 | 0.289972 | 0.869 | 0.607 | 1.55E-21 | Epi-B1 |
| GNB2L1    | 1.06E-25 | 0.252304 | 1     | 0.99  | 1.93E-21 | Epi-B1 |
| NPC2      | 1.31E-25 | 0.274648 | 1     | 0.867 | 2.38E-21 | Epi-B1 |
| EEF1G     | 1.37E-25 | 0.274849 | 0.996 | 0.988 | 2.49E-21 | Epi-B1 |
| TPI1      | 2.39E-25 | 0.262477 | 0.996 | 0.967 | 4.34E-21 | Epi-B1 |
| STRA13    | 2.76E-25 | 0.33851  | 0.83  | 0.562 | 5.03E-21 | Epi-B1 |
| LYPD6B    | 3.28E-25 | 0.26486  | 0.613 | 0.31  | 5.97E-21 | Epi-B1 |
| SUPT16H   | 3.82E-25 | 0.258266 | 0.603 | 0.299 | 6.96E-21 | Epi-B1 |
| TMEM100   | 4.00E-25 | 0.309474 | 0.585 | 0.291 | 7.29E-21 | Epi-B1 |
| ARHGDIB   | 5.44E-25 | 0.324874 | 0.759 | 0.433 | 9.90E-21 | Epi-B1 |
| SNRPF     | 1.27E-24 | 0.304787 | 0.926 | 0.736 | 2.30E-20 | Epi-B1 |
| HSPB11    | 1.74E-24 | 0.326665 | 0.883 | 0.599 | 3.17E-20 | Epi-B1 |
| PTGES3    | 1.87E-24 | 0.293512 | 0.975 | 0.846 | 3.41E-20 | Epi-B1 |
| HMG3      | 3.55E-24 | 0.333241 | 0.989 | 0.93  | 6.46E-20 | Epi-B1 |
| TUBB6     | 7.89E-24 | 0.320065 | 0.819 | 0.519 | 1.44E-19 | Epi-B1 |
| SUCO      | 1.07E-23 | 0.336008 | 0.826 | 0.542 | 1.94E-19 | Epi-B1 |
| EEF1B2    | 1.49E-23 | 0.279928 | 0.986 | 0.902 | 2.71E-19 | Epi-B1 |
| FUS       | 1.59E-23 | 0.270116 | 0.837 | 0.52  | 2.90E-19 | Epi-B1 |
| EFEMP1    | 1.70E-23 | 0.258746 | 0.617 | 0.31  | 3.10E-19 | Epi-B1 |
| SRSF7     | 4.12E-23 | 0.335122 | 0.957 | 0.852 | 7.50E-19 | Epi-B1 |
| TNFRSF12A | 1.01E-22 | 0.360927 | 0.67  | 0.381 | 1.83E-18 | Epi-B1 |
| HNRNPF    | 1.08E-22 | 0.275948 | 0.972 | 0.819 | 1.96E-18 | Epi-B1 |
| RAB13     | 2.02E-22 | 0.252941 | 0.855 | 0.588 | 3.67E-18 | Epi-B1 |
| NUDCD2    | 2.46E-22 | 0.265109 | 0.752 | 0.457 | 4.48E-18 | Epi-B1 |
| FDPS      | 3.17E-22 | 0.280442 | 0.801 | 0.509 | 5.77E-18 | Epi-B1 |
| SRSF2     | 3.40E-22 | 0.284765 | 0.986 | 0.881 | 6.19E-18 | Epi-B1 |
| MAGOH     | 3.41E-22 | 0.251917 | 0.883 | 0.592 | 6.21E-18 | Epi-B1 |
| EBP       | 3.48E-22 | 0.256771 | 0.702 | 0.395 | 6.34E-18 | Epi-B1 |
| TUBA1C    | 6.02E-22 | 0.456737 | 0.816 | 0.592 | 1.10E-17 | Epi-B1 |
| PSMA2     | 7.45E-22 | 0.257137 | 0.975 | 0.883 | 1.36E-17 | Epi-B1 |
| TXNDC12   | 7.93E-22 | 0.264716 | 0.77  | 0.469 | 1.44E-17 | Epi-B1 |
| GSPT1     | 1.15E-21 | 0.270649 | 0.809 | 0.508 | 2.09E-17 | Epi-B1 |
| H1FX      | 1.52E-21 | 0.331881 | 0.709 | 0.418 | 2.77E-17 | Epi-B1 |
| SLC25A5   | 3.78E-21 | 0.352681 | 0.979 | 0.873 | 6.88E-17 | Epi-B1 |
| CRNDE     | 4.42E-21 | 0.332337 | 0.624 | 0.35  | 8.05E-17 | Epi-B1 |
| RBMX      | 6.20E-21 | 0.277754 | 0.84  | 0.618 | 1.13E-16 | Epi-B1 |
| RPA2      | 1.50E-20 | 0.281225 | 0.77  | 0.48  | 2.73E-16 | Epi-B1 |
| PSMA4     | 3.07E-20 | 0.290694 | 0.95  | 0.792 | 5.60E-16 | Epi-B1 |
| AVPI1     | 7.12E-20 | 0.319846 | 0.805 | 0.526 | 1.30E-15 | Epi-B1 |
| CRTAC1    | 9.90E-20 | 0.326078 | 0.95  | 0.697 | 1.80E-15 | Epi-B1 |
| CAPG      | 1.09E-19 | 0.256803 | 0.957 | 0.828 | 1.98E-15 | Epi-B1 |
| VPS29     | 1.12E-19 | 0.275444 | 0.954 | 0.806 | 2.03E-15 | Epi-B1 |
| CALM2     | 1.33E-19 | 0.345794 | 0.996 | 0.979 | 2.42E-15 | Epi-B1 |
| ANAPC11   | 1.33E-19 | 0.25291  | 0.989 | 0.855 | 2.42E-15 | Epi-B1 |
| VDAC1     | 2.05E-19 | 0.260884 | 0.954 | 0.774 | 3.74E-15 | Epi-B1 |
| IMPDH2    | 2.19E-19 | 0.264271 | 0.716 | 0.462 | 3.99E-15 | Epi-B1 |
| RAB4A     | 2.26E-19 | 0.274926 | 0.936 | 0.734 | 4.12E-15 | Epi-B1 |



|          |           |          |       |       |           |        |
|----------|-----------|----------|-------|-------|-----------|--------|
| TKT      | 2.33E-19  | 0.342045 | 0.996 | 0.865 | 4.25E-15  | Epi-B1 |
| SFPQ     | 3.26E-19  | 0.284769 | 0.872 | 0.64  | 5.93E-15  | Epi-B1 |
| CTSL2    | 8.64E-19  | 0.346614 | 0.922 | 0.648 | 1.57E-14  | Epi-B1 |
| GAS5     | 2.09E-18  | 0.343632 | 0.989 | 0.934 | 3.80E-14  | Epi-B1 |
| ETFB     | 2.30E-18  | 0.251607 | 0.883 | 0.697 | 4.19E-14  | Epi-B1 |
| RHEB     | 6.55E-18  | 0.261918 | 0.915 | 0.783 | 1.19E-13  | Epi-B1 |
| SNRPG    | 5.17E-17  | 0.257624 | 0.989 | 0.915 | 9.41E-13  | Epi-B1 |
| LMNA     | 9.13E-17  | 0.291688 | 1     | 0.966 | 1.66E-12  | Epi-B1 |
| SIVA1    | 1.13E-16  | 0.264872 | 0.858 | 0.596 | 2.06E-12  | Epi-B1 |
| GYG1     | 1.43E-16  | 0.272616 | 0.844 | 0.588 | 2.61E-12  | Epi-B1 |
| NQO1     | 3.21E-15  | 0.278013 | 1     | 0.946 | 5.84E-11  | Epi-B1 |
| KRT18    | 1.44E-14  | 0.275777 | 0.95  | 0.74  | 2.62E-10  | Epi-B1 |
| NCL      | 2.15E-14  | 0.253018 | 0.926 | 0.807 | 3.92E-10  | Epi-B1 |
| TGFBI    | 2.93E-13  | 0.302615 | 0.972 | 0.902 | 5.33E-09  | Epi-B1 |
| SERPINB5 | 1.15E-11  | 0.255266 | 0.918 | 0.72  | 2.10E-07  | Epi-B1 |
| ALDH3A1  | 4.02E-11  | 0.280628 | 0.996 | 0.977 | 7.32E-07  | Epi-B1 |
| LY6D     | 1.07E-05  | 0.27757  | 0.596 | 0.434 | 0.194297  | Epi-B1 |
| AQP5     | 0         | 2.835223 | 1     | 0.194 | 0         | Conj-3 |
| CEACAM7  | 0         | 1.479685 | 0.658 | 0.013 | 0         | Conj-3 |
| KRT7     | 0         | 1.366083 | 0.824 | 0.073 | 0         | Conj-3 |
| CEACAM6  | 0         | 0.864116 | 0.619 | 0.037 | 0         | Conj-3 |
| SERPINA1 | 0         | 0.823939 | 0.601 | 0.029 | 0         | Conj-3 |
| CEACAM5  | 0         | 0.81823  | 0.468 | 0.019 | 0         | Conj-3 |
| VSIG2    | 0         | 0.789629 | 0.658 | 0.031 | 0         | Conj-3 |
| GCNT3    | 0         | 0.775803 | 0.612 | 0.022 | 0         | Conj-3 |
| SLC34A2  | 0         | 0.752095 | 0.579 | 0.037 | 0         | Conj-3 |
| SLC6A14  | 0         | 0.370978 | 0.288 | 0.008 | 0         | Conj-3 |
| MB       | 0         | 0.339596 | 0.32  | 0.013 | 0         | Conj-3 |
| MUC1     | 6.15E-303 | 0.681877 | 0.55  | 0.046 | 1.12E-298 | Conj-3 |
| MMP7     | 2.26E-284 | 0.358682 | 0.259 | 0.009 | 4.12E-280 | Conj-3 |
| ATP6V1C2 | 6.66E-282 | 0.349171 | 0.255 | 0.009 | 1.21E-277 | Conj-3 |
| LRRC26   | 4.83E-280 | 0.33296  | 0.273 | 0.011 | 8.79E-276 | Conj-3 |
| KRT4     | 6.56E-272 | 2.074603 | 0.946 | 0.188 | 1.20E-267 | Conj-3 |
| LCN2     | 2.57E-270 | 2.343971 | 0.95  | 0.21  | 4.67E-266 | Conj-3 |
| SPRR3    | 1.97E-252 | 1.129042 | 0.313 | 0.016 | 3.58E-248 | Conj-3 |
| FAM3B    | 1.70E-246 | 1.187869 | 0.863 | 0.162 | 3.10E-242 | Conj-3 |
| F3       | 1.36E-245 | 1.6563   | 0.978 | 0.236 | 2.48E-241 | Conj-3 |
| DEGS2    | 1.15E-231 | 0.84501  | 0.655 | 0.09  | 2.09E-227 | Conj-3 |
| SLC40A1  | 6.09E-225 | 0.314066 | 0.299 | 0.017 | 1.11E-220 | Conj-3 |
| CP       | 2.99E-223 | 0.729998 | 0.676 | 0.095 | 5.44E-219 | Conj-3 |
| NCCRP1   | 8.22E-218 | 0.636873 | 0.453 | 0.043 | 1.50E-213 | Conj-3 |
| PSCA     | 5.90E-207 | 1.968382 | 0.853 | 0.183 | 1.07E-202 | Conj-3 |
| CXCL17   | 1.21E-197 | 1.793704 | 0.996 | 0.395 | 2.21E-193 | Conj-3 |
| FAM3D    | 1.74E-196 | 1.064799 | 0.853 | 0.191 | 3.17E-192 | Conj-3 |
| S100A9   | 2.51E-192 | 2.799856 | 0.989 | 0.392 | 4.58E-188 | Conj-3 |
| ATP10B   | 3.79E-192 | 0.297207 | 0.317 | 0.023 | 6.91E-188 | Conj-3 |
| WFDC2    | 9.03E-191 | 1.080516 | 0.576 | 0.082 | 1.64E-186 | Conj-3 |
| LYPD2    | 2.41E-189 | 2.077437 | 0.719 | 0.133 | 4.39E-185 | Conj-3 |

|            |           |          |       |       |           |        |
|------------|-----------|----------|-------|-------|-----------|--------|
| ALOX5      | 1.35E-182 | 0.399205 | 0.388 | 0.037 | 2.47E-178 | Conj-3 |
| PP14571    | 1.90E-178 | 0.396068 | 0.345 | 0.03  | 3.46E-174 | Conj-3 |
| BCAS1      | 3.87E-174 | 0.639658 | 0.619 | 0.102 | 7.04E-170 | Conj-3 |
| S100P      | 1.86E-171 | 0.814071 | 0.378 | 0.038 | 3.39E-167 | Conj-3 |
| GDF15      | 3.22E-166 | 0.625738 | 0.324 | 0.028 | 5.86E-162 | Conj-3 |
| BARX2      | 4.53E-164 | 0.645805 | 0.676 | 0.121 | 8.25E-160 | Conj-3 |
| MDK        | 1.07E-160 | 1.102435 | 0.896 | 0.274 | 1.94E-156 | Conj-3 |
| SLPI       | 5.69E-149 | 1.455801 | 0.996 | 0.451 | 1.04E-144 | Conj-3 |
| LOC440335  | 1.42E-148 | 0.702373 | 0.576 | 0.101 | 2.58E-144 | Conj-3 |
| CYP4B1     | 1.12E-146 | 0.519262 | 0.478 | 0.069 | 2.04E-142 | Conj-3 |
| MUC21      | 1.43E-146 | 0.819472 | 0.673 | 0.136 | 2.60E-142 | Conj-3 |
| MUC20      | 5.38E-142 | 1.037372 | 0.928 | 0.361 | 9.79E-138 | Conj-3 |
| FBP1       | 1.20E-140 | 0.553875 | 0.568 | 0.102 | 2.19E-136 | Conj-3 |
| PRSS22     | 1.83E-140 | 0.731957 | 0.719 | 0.166 | 3.33E-136 | Conj-3 |
| OSR2       | 5.94E-140 | 0.953569 | 0.874 | 0.249 | 1.08E-135 | Conj-3 |
| TMC5       | 1.49E-139 | 0.412984 | 0.399 | 0.051 | 2.70E-135 | Conj-3 |
| C11orf92   | 2.05E-136 | 0.305605 | 0.331 | 0.035 | 3.73E-132 | Conj-3 |
| S100A11    | 7.75E-135 | 1.140769 | 1     | 0.985 | 1.41E-130 | Conj-3 |
| MSLN       | 3.12E-134 | 1.024596 | 0.817 | 0.248 | 5.69E-130 | Conj-3 |
| CTSS       | 3.13E-130 | 0.707157 | 0.799 | 0.227 | 5.69E-126 | Conj-3 |
| HIST1H2BC  | 8.77E-128 | 0.912405 | 0.615 | 0.13  | 1.60E-123 | Conj-3 |
| HOPX       | 1.05E-127 | 1.360799 | 0.971 | 0.555 | 1.91E-123 | Conj-3 |
| CLDN3      | 1.26E-126 | 0.613404 | 0.471 | 0.077 | 2.29E-122 | Conj-3 |
| S100A8     | 1.72E-123 | 2.335563 | 0.91  | 0.41  | 3.12E-119 | Conj-3 |
| PDZK1IP1   | 4.73E-123 | 0.617362 | 0.439 | 0.069 | 8.61E-119 | Conj-3 |
| HIST1H2AC  | 1.47E-121 | 0.863004 | 0.701 | 0.176 | 2.68E-117 | Conj-3 |
| TJP3       | 1.12E-119 | 0.342983 | 0.414 | 0.061 | 2.04E-115 | Conj-3 |
| TFPI2      | 1.47E-119 | 0.482169 | 0.403 | 0.059 | 2.68E-115 | Conj-3 |
| POLR2J2    | 5.72E-117 | 1.011655 | 1     | 0.88  | 1.04E-112 | Conj-3 |
| FUT3       | 3.06E-115 | 0.299589 | 0.406 | 0.061 | 5.57E-111 | Conj-3 |
| LRG1       | 1.01E-113 | 0.38298  | 0.399 | 0.06  | 1.84E-109 | Conj-3 |
| POLR2J3    | 1.90E-112 | 1.013823 | 1     | 0.872 | 3.46E-108 | Conj-3 |
| NDRG2      | 1.59E-111 | 0.84474  | 0.845 | 0.349 | 2.89E-107 | Conj-3 |
| FAM105A    | 8.83E-110 | 0.496821 | 0.421 | 0.069 | 1.61E-105 | Conj-3 |
| RARRES3    | 3.27E-107 | 1.004161 | 0.903 | 0.406 | 5.95E-103 | Conj-3 |
| KRT13      | 1.28E-106 | 1.273444 | 1     | 0.647 | 2.32E-102 | Conj-3 |
| HIST1H2BK  | 1.13E-101 | 0.639472 | 0.651 | 0.176 | 2.05E-97  | Conj-3 |
| A4GALT     | 2.56E-97  | 0.923642 | 0.924 | 0.523 | 4.66E-93  | Conj-3 |
| SERPINB1   | 2.88E-97  | 1.2258   | 0.932 | 0.596 | 5.24E-93  | Conj-3 |
| B2M        | 1.60E-94  | 0.795659 | 1     | 0.997 | 2.91E-90  | Conj-3 |
| KLK11      | 7.78E-93  | 0.760161 | 0.838 | 0.347 | 1.42E-88  | Conj-3 |
| ST6GALNAC1 | 2.15E-92  | 0.363359 | 0.453 | 0.09  | 3.92E-88  | Conj-3 |
| CYBA       | 7.73E-92  | 0.80926  | 0.928 | 0.548 | 1.41E-87  | Conj-3 |
| BAG1       | 1.21E-91  | 0.793815 | 0.989 | 0.904 | 2.21E-87  | Conj-3 |
| ELF3       | 1.70E-91  | 0.935701 | 1     | 0.808 | 3.09E-87  | Conj-3 |
| ST3GAL4    | 3.01E-91  | 0.630579 | 0.838 | 0.327 | 5.49E-87  | Conj-3 |
| CFD        | 5.43E-91  | 1.010146 | 0.849 | 0.352 | 9.88E-87  | Conj-3 |
| KRT8       | 1.41E-90  | 0.938286 | 0.856 | 0.389 | 2.57E-86  | Conj-3 |

|            |          |          |       |       |          |        |
|------------|----------|----------|-------|-------|----------|--------|
| AQP3       | 9.42E-88 | 0.926714 | 0.996 | 0.662 | 1.71E-83 | Conj-3 |
| SMIM5      | 2.62E-86 | 0.808904 | 0.77  | 0.268 | 4.78E-82 | Conj-3 |
| HIST2H2AA4 | 2.93E-86 | 1.088669 | 0.978 | 0.714 | 5.34E-82 | Conj-3 |
| LGALS3     | 3.75E-86 | 0.74294  | 0.996 | 0.989 | 6.82E-82 | Conj-3 |
| UCP2       | 5.29E-86 | 0.351706 | 0.417 | 0.082 | 9.63E-82 | Conj-3 |
| HIST1H2BG  | 5.91E-85 | 0.476269 | 0.46  | 0.099 | 1.08E-80 | Conj-3 |
| GBP2       | 7.32E-84 | 0.315292 | 0.421 | 0.084 | 1.33E-79 | Conj-3 |
| EMILIN2    | 1.13E-83 | 0.308482 | 0.317 | 0.05  | 2.06E-79 | Conj-3 |
| SLC16A3    | 5.00E-82 | 0.514262 | 0.532 | 0.137 | 9.11E-78 | Conj-3 |
| RBPMS      | 3.01E-80 | 0.251153 | 0.324 | 0.054 | 5.47E-76 | Conj-3 |
| LYN        | 9.38E-79 | 0.26482  | 0.338 | 0.059 | 1.71E-74 | Conj-3 |
| LOC645638  | 1.02E-78 | 0.591913 | 0.647 | 0.199 | 1.87E-74 | Conj-3 |
| DUSP4      | 3.34E-78 | 0.316137 | 0.32  | 0.054 | 6.07E-74 | Conj-3 |
| HIST1H2BD  | 7.83E-77 | 0.550188 | 0.554 | 0.153 | 1.43E-72 | Conj-3 |
| APOBEC3A   | 7.89E-77 | 1.126503 | 0.82  | 0.338 | 1.44E-72 | Conj-3 |
| FAM213A    | 1.33E-74 | 0.625031 | 0.813 | 0.337 | 2.43E-70 | Conj-3 |
| AMN        | 2.40E-73 | 0.298185 | 0.342 | 0.064 | 4.37E-69 | Conj-3 |
| NMB        | 3.20E-72 | 0.437648 | 0.424 | 0.098 | 5.83E-68 | Conj-3 |
| REGG       | 2.43E-71 | 0.469758 | 0.626 | 0.195 | 4.42E-67 | Conj-3 |
| MAOA       | 7.84E-71 | 0.539951 | 0.665 | 0.245 | 1.43E-66 | Conj-3 |
| SERINC2    | 9.64E-71 | 0.653624 | 0.892 | 0.549 | 1.76E-66 | Conj-3 |
| ZNF296     | 1.29E-70 | 0.449823 | 0.554 | 0.162 | 2.36E-66 | Conj-3 |
| C19orf33   | 2.99E-70 | 0.62213  | 1     | 0.85  | 5.45E-66 | Conj-3 |
| IL1RN      | 4.50E-69 | 1.419676 | 0.878 | 0.556 | 8.20E-65 | Conj-3 |
| CSTA       | 2.70E-68 | 0.845669 | 0.978 | 0.76  | 4.91E-64 | Conj-3 |
| RAB11FIP1  | 4.31E-67 | 0.474858 | 0.489 | 0.135 | 7.85E-63 | Conj-3 |
| HIST1H2AE  | 1.18E-66 | 0.447089 | 0.478 | 0.126 | 2.15E-62 | Conj-3 |
| IFT172     | 3.61E-66 | 0.354865 | 0.464 | 0.119 | 6.57E-62 | Conj-3 |
| SELENBP1   | 8.88E-66 | 0.570131 | 0.637 | 0.236 | 1.62E-61 | Conj-3 |
| CYP27A1    | 1.03E-65 | 0.328255 | 0.374 | 0.082 | 1.88E-61 | Conj-3 |
| MX1        | 1.26E-65 | 0.398459 | 0.475 | 0.124 | 2.29E-61 | Conj-3 |
| COX7A1     | 8.65E-65 | 0.728582 | 0.885 | 0.477 | 1.57E-60 | Conj-3 |
| ARPC3      | 2.86E-64 | 0.559047 | 0.953 | 0.881 | 5.21E-60 | Conj-3 |
| CD74       | 3.70E-64 | 0.573681 | 0.824 | 0.42  | 6.73E-60 | Conj-3 |
| CLIC1      | 2.28E-63 | 0.526387 | 0.989 | 0.912 | 4.14E-59 | Conj-3 |
| B3GNT3     | 4.97E-63 | 0.27192  | 0.356 | 0.077 | 9.05E-59 | Conj-3 |
| TNFRSF21   | 7.20E-63 | 0.298377 | 0.392 | 0.091 | 1.31E-58 | Conj-3 |
| B4GALT5    | 2.68E-62 | 0.509053 | 0.601 | 0.207 | 4.88E-58 | Conj-3 |
| HLA-DRA    | 3.11E-62 | 0.365193 | 0.597 | 0.204 | 5.66E-58 | Conj-3 |
| GGT6       | 3.72E-62 | 0.417945 | 0.579 | 0.19  | 6.77E-58 | Conj-3 |
| PPDPF      | 5.16E-62 | 0.495938 | 1     | 0.967 | 9.40E-58 | Conj-3 |
| CDKN2B     | 6.80E-62 | 0.576032 | 0.687 | 0.277 | 1.24E-57 | Conj-3 |
| RHCG       | 1.28E-60 | 0.36915  | 0.367 | 0.083 | 2.32E-56 | Conj-3 |
| TMSB4X     | 3.03E-60 | 0.512746 | 1     | 0.998 | 5.52E-56 | Conj-3 |
| RRAD       | 3.27E-60 | 0.507439 | 0.46  | 0.128 | 5.96E-56 | Conj-3 |
| HES4       | 1.29E-57 | 0.574203 | 0.835 | 0.392 | 2.36E-53 | Conj-3 |
| TMEM45B    | 3.86E-57 | 0.255755 | 0.327 | 0.072 | 7.03E-53 | Conj-3 |
| CLINT1     | 8.95E-57 | 0.584821 | 0.809 | 0.43  | 1.63E-52 | Conj-3 |

|           |          |          |       |       |          |        |
|-----------|----------|----------|-------|-------|----------|--------|
| SYT8      | 3.06E-56 | 0.621191 | 0.986 | 0.756 | 5.58E-52 | Conj-3 |
| ZFP36L1   | 7.98E-56 | 0.62952  | 0.978 | 0.845 | 1.45E-51 | Conj-3 |
| DUSP5     | 1.16E-55 | 0.517378 | 0.435 | 0.123 | 2.11E-51 | Conj-3 |
| NUAK2     | 2.87E-55 | 0.672447 | 0.802 | 0.412 | 5.23E-51 | Conj-3 |
| C9orf16   | 4.86E-54 | 0.535314 | 0.978 | 0.858 | 8.85E-50 | Conj-3 |
| C15orf48  | 9.74E-54 | 0.54858  | 0.317 | 0.072 | 1.77E-49 | Conj-3 |
| CALM1     | 9.89E-54 | 0.481116 | 0.982 | 0.96  | 1.80E-49 | Conj-3 |
| H2AFJ     | 1.04E-53 | 0.621575 | 0.849 | 0.549 | 1.89E-49 | Conj-3 |
| SPRR1A    | 1.43E-53 | 0.749256 | 0.374 | 0.096 | 2.61E-49 | Conj-3 |
| MIDN      | 2.17E-53 | 0.64822  | 0.856 | 0.489 | 3.95E-49 | Conj-3 |
| RHOV      | 2.58E-52 | 0.599991 | 0.986 | 0.636 | 4.70E-48 | Conj-3 |
| DDIT4     | 5.08E-52 | 0.775725 | 0.809 | 0.458 | 9.26E-48 | Conj-3 |
| LGALS9    | 1.02E-51 | 0.276305 | 0.327 | 0.077 | 1.85E-47 | Conj-3 |
| HIST1H1C  | 5.24E-51 | 0.790941 | 0.568 | 0.219 | 9.53E-47 | Conj-3 |
| SOX7      | 5.13E-50 | 0.255996 | 0.36  | 0.091 | 9.35E-46 | Conj-3 |
| HIST2H2BE | 6.35E-50 | 0.510957 | 0.622 | 0.253 | 1.16E-45 | Conj-3 |
| CLIC3     | 8.19E-50 | 0.485987 | 0.532 | 0.189 | 1.49E-45 | Conj-3 |
| SLC9A3R1  | 3.23E-48 | 0.472529 | 0.838 | 0.495 | 5.88E-44 | Conj-3 |
| DUSP2     | 6.49E-48 | 0.528558 | 0.5   | 0.174 | 1.18E-43 | Conj-3 |
| S100A16   | 3.65E-47 | 0.479681 | 0.953 | 0.718 | 6.65E-43 | Conj-3 |
| CNFN      | 3.69E-47 | 0.298307 | 0.414 | 0.122 | 6.71E-43 | Conj-3 |
| TMSB10    | 8.40E-47 | 0.370361 | 1     | 0.997 | 1.53E-42 | Conj-3 |
| SMAGP     | 5.69E-46 | 0.463243 | 0.741 | 0.378 | 1.04E-41 | Conj-3 |
| LMO4      | 8.30E-46 | 0.559448 | 0.838 | 0.572 | 1.51E-41 | Conj-3 |
| PHLDA2    | 9.59E-46 | 0.560294 | 0.996 | 0.903 | 1.75E-41 | Conj-3 |
| RAB25     | 1.44E-45 | 0.503637 | 0.878 | 0.582 | 2.62E-41 | Conj-3 |
| EPCAM     | 1.34E-44 | 0.335477 | 0.482 | 0.165 | 2.44E-40 | Conj-3 |
| CTSB      | 1.59E-44 | 0.460128 | 0.921 | 0.78  | 2.90E-40 | Conj-3 |
| KLF5      | 2.12E-44 | 0.532042 | 0.935 | 0.682 | 3.85E-40 | Conj-3 |
| HSPB1     | 2.19E-44 | 0.473435 | 1     | 0.985 | 3.98E-40 | Conj-3 |
| MSMB      | 2.74E-44 | 0.296753 | 0.428 | 0.13  | 4.99E-40 | Conj-3 |
| PPAP2C    | 5.54E-44 | 0.345292 | 0.482 | 0.166 | 1.01E-39 | Conj-3 |
| PRDX6     | 1.52E-43 | 0.463313 | 0.953 | 0.854 | 2.77E-39 | Conj-3 |
| COX7A2    | 4.93E-43 | 0.351747 | 0.989 | 0.976 | 8.98E-39 | Conj-3 |
| CD55      | 7.34E-43 | 0.690872 | 0.835 | 0.562 | 1.34E-38 | Conj-3 |
| TXNIP     | 1.50E-42 | 0.769039 | 0.906 | 0.673 | 2.73E-38 | Conj-3 |
| CLDN4     | 2.63E-42 | 0.482479 | 0.971 | 0.615 | 4.79E-38 | Conj-3 |
| TACSTD2   | 3.24E-42 | 0.464655 | 1     | 0.9   | 5.91E-38 | Conj-3 |
| CHCHD10   | 4.39E-42 | 0.411525 | 0.644 | 0.278 | 7.98E-38 | Conj-3 |
| LITAF     | 5.47E-42 | 0.513379 | 0.838 | 0.563 | 9.96E-38 | Conj-3 |
| GPR98     | 9.05E-42 | 0.382149 | 0.299 | 0.08  | 1.65E-37 | Conj-3 |
| BID       | 1.33E-41 | 0.400576 | 0.633 | 0.283 | 2.42E-37 | Conj-3 |
| MYL6      | 1.34E-41 | 0.328557 | 1     | 0.988 | 2.44E-37 | Conj-3 |
| REEP6     | 2.94E-41 | 0.395752 | 0.59  | 0.254 | 5.36E-37 | Conj-3 |
| AX747171  | 3.25E-41 | 0.339244 | 0.507 | 0.186 | 5.92E-37 | Conj-3 |
| ZNF593    | 5.25E-41 | 0.443653 | 0.694 | 0.328 | 9.55E-37 | Conj-3 |
| RHBDL2    | 2.21E-40 | 0.32923  | 0.536 | 0.212 | 4.02E-36 | Conj-3 |
| PIM3      | 2.34E-40 | 0.506595 | 0.845 | 0.539 | 4.25E-36 | Conj-3 |

|          |          |          |       |       |          |        |
|----------|----------|----------|-------|-------|----------|--------|
| PITPNC1  | 4.65E-40 | 0.267574 | 0.464 | 0.161 | 8.47E-36 | Conj-3 |
| RAC1     | 4.88E-40 | 0.355919 | 0.968 | 0.954 | 8.89E-36 | Conj-3 |
| TC2N     | 8.78E-40 | 0.253757 | 0.378 | 0.114 | 1.60E-35 | Conj-3 |
| FXYD3    | 1.58E-39 | 0.410968 | 0.996 | 0.863 | 2.88E-35 | Conj-3 |
| SPRR1B   | 2.21E-39 | 0.70473  | 0.284 | 0.073 | 4.03E-35 | Conj-3 |
| BC070363 | 4.67E-39 | 0.339975 | 0.511 | 0.201 | 8.50E-35 | Conj-3 |
| HEBP2    | 6.02E-39 | 0.494393 | 0.838 | 0.609 | 1.10E-34 | Conj-3 |
| PRSS8    | 6.25E-39 | 0.431008 | 0.719 | 0.383 | 1.14E-34 | Conj-3 |
| PSMB10   | 7.48E-39 | 0.458533 | 0.788 | 0.464 | 1.36E-34 | Conj-3 |
| CRIP2    | 9.35E-39 | 0.382388 | 0.547 | 0.214 | 1.70E-34 | Conj-3 |
| SULT2B1  | 1.01E-38 | 0.358465 | 0.68  | 0.303 | 1.85E-34 | Conj-3 |
| AKR1A1   | 1.42E-38 | 0.479066 | 0.871 | 0.661 | 2.59E-34 | Conj-3 |
| CCDC6    | 2.93E-37 | 0.28875  | 0.432 | 0.152 | 5.34E-33 | Conj-3 |
| SAT1     | 3.40E-37 | 0.45737  | 1     | 0.991 | 6.19E-33 | Conj-3 |
| CAPNS2   | 5.03E-37 | 0.528864 | 0.845 | 0.587 | 9.15E-33 | Conj-3 |
| AES      | 5.05E-37 | 0.473261 | 0.888 | 0.641 | 9.20E-33 | Conj-3 |
| IVL      | 1.84E-36 | 0.290434 | 0.263 | 0.067 | 3.36E-32 | Conj-3 |
| ISG20    | 3.54E-36 | 0.510024 | 0.421 | 0.153 | 6.44E-32 | Conj-3 |
| HES1     | 6.33E-36 | 0.756489 | 0.917 | 0.756 | 1.15E-31 | Conj-3 |
| TSPAN13  | 6.91E-36 | 0.408284 | 0.597 | 0.286 | 1.26E-31 | Conj-3 |
| EPS8L1   | 1.19E-35 | 0.314597 | 0.5   | 0.197 | 2.17E-31 | Conj-3 |
| HLA-B    | 2.32E-35 | 0.551979 | 0.971 | 0.924 | 4.23E-31 | Conj-3 |
| COX8A    | 2.65E-35 | 0.38227  | 0.942 | 0.849 | 4.82E-31 | Conj-3 |
| TMC4     | 2.90E-35 | 0.335109 | 0.435 | 0.165 | 5.28E-31 | Conj-3 |
| NOTCH2NL | 7.14E-35 | 0.422144 | 0.835 | 0.551 | 1.30E-30 | Conj-3 |
| HOMER2   | 8.63E-35 | 0.305425 | 0.439 | 0.166 | 1.57E-30 | Conj-3 |
| PLSCR1   | 8.64E-35 | 0.315802 | 0.507 | 0.205 | 1.57E-30 | Conj-3 |
| PITX1    | 9.95E-35 | 0.271899 | 0.349 | 0.109 | 1.81E-30 | Conj-3 |
| CASP4    | 1.01E-34 | 0.403062 | 0.719 | 0.403 | 1.85E-30 | Conj-3 |
| ABRACL   | 2.06E-34 | 0.392164 | 0.73  | 0.402 | 3.74E-30 | Conj-3 |
| DEFB1    | 2.37E-34 | 0.410504 | 0.759 | 0.396 | 4.32E-30 | Conj-3 |
| CTSD     | 3.04E-34 | 0.412514 | 0.964 | 0.897 | 5.53E-30 | Conj-3 |
| VAMP8    | 3.54E-34 | 0.408301 | 0.95  | 0.761 | 6.44E-30 | Conj-3 |
| PPM1K    | 3.70E-34 | 0.277209 | 0.392 | 0.135 | 6.73E-30 | Conj-3 |
| SOX9     | 4.27E-34 | 0.30092  | 0.367 | 0.121 | 7.77E-30 | Conj-3 |
| FGGY     | 5.20E-34 | 0.453716 | 0.669 | 0.358 | 9.47E-30 | Conj-3 |
| IGFBP3   | 7.68E-34 | 0.487753 | 0.511 | 0.203 | 1.40E-29 | Conj-3 |
| CCDC64B  | 1.22E-33 | 0.34324  | 0.529 | 0.229 | 2.23E-29 | Conj-3 |
| ATP1B1   | 1.81E-33 | 0.32862  | 0.529 | 0.226 | 3.30E-29 | Conj-3 |
| COX14    | 3.74E-33 | 0.396262 | 0.921 | 0.756 | 6.81E-29 | Conj-3 |
| CIB1     | 3.90E-33 | 0.442162 | 0.888 | 0.738 | 7.10E-29 | Conj-3 |
| CLDN7    | 1.63E-32 | 0.388733 | 0.96  | 0.617 | 2.97E-28 | Conj-3 |
| ERBB2    | 2.78E-32 | 0.286841 | 0.432 | 0.165 | 5.06E-28 | Conj-3 |
| SERTAD1  | 3.28E-32 | 0.439161 | 0.871 | 0.594 | 5.97E-28 | Conj-3 |
| C1orf210 | 4.29E-32 | 0.254244 | 0.406 | 0.151 | 7.81E-28 | Conj-3 |
| ZNF750   | 2.12E-31 | 0.340574 | 0.644 | 0.312 | 3.86E-27 | Conj-3 |
| LSP1     | 2.84E-31 | 0.353865 | 0.68  | 0.324 | 5.17E-27 | Conj-3 |
| CHMP4B   | 7.28E-31 | 0.384254 | 0.917 | 0.764 | 1.33E-26 | Conj-3 |

|                |          |          |       |       |          |        |
|----------------|----------|----------|-------|-------|----------|--------|
| CDKN1A         | 1.12E-30 | 0.420545 | 0.892 | 0.689 | 2.04E-26 | Conj-3 |
| KRT17          | 4.34E-30 | 0.759358 | 0.716 | 0.417 | 7.90E-26 | Conj-3 |
| SERF2          | 4.48E-30 | 0.268661 | 1     | 0.992 | 8.15E-26 | Conj-3 |
| SH3GLB2        | 5.63E-30 | 0.254068 | 0.406 | 0.154 | 1.03E-25 | Conj-3 |
| EIF6           | 6.84E-30 | 0.386709 | 0.939 | 0.769 | 1.25E-25 | Conj-3 |
| ARHGDI8        | 6.90E-30 | 0.410415 | 0.73  | 0.434 | 1.26E-25 | Conj-3 |
| TMEM40         | 9.87E-30 | 0.390825 | 0.619 | 0.335 | 1.80E-25 | Conj-3 |
| ST6GALNAC6     | 1.51E-29 | 0.269902 | 0.41  | 0.16  | 2.75E-25 | Conj-3 |
| CHMP1B         | 2.81E-29 | 0.438283 | 0.899 | 0.739 | 5.12E-25 | Conj-3 |
| MALL           | 2.94E-29 | 0.448033 | 0.914 | 0.72  | 5.36E-25 | Conj-3 |
| SRD5A3         | 3.34E-29 | 0.344641 | 0.576 | 0.284 | 6.08E-25 | Conj-3 |
| KCNK6          | 5.17E-29 | 0.25528  | 0.428 | 0.169 | 9.42E-25 | Conj-3 |
| H19            | 1.80E-28 | 0.308249 | 0.367 | 0.135 | 3.28E-24 | Conj-3 |
| DNAJB1         | 4.78E-28 | 0.362989 | 0.964 | 0.912 | 8.70E-24 | Conj-3 |
| GPRC5C         | 6.07E-28 | 0.350419 | 0.594 | 0.3   | 1.10E-23 | Conj-3 |
| ETS2           | 6.27E-28 | 0.34431  | 0.662 | 0.353 | 1.14E-23 | Conj-3 |
| TOM1           | 7.26E-28 | 0.282246 | 0.486 | 0.214 | 1.32E-23 | Conj-3 |
| GMDS           | 7.31E-28 | 0.331469 | 0.669 | 0.37  | 1.33E-23 | Conj-3 |
| EVA1A          | 9.04E-28 | 0.278833 | 0.453 | 0.194 | 1.65E-23 | Conj-3 |
| TNNI2          | 1.16E-27 | 0.348314 | 0.55  | 0.266 | 2.12E-23 | Conj-3 |
| LAMTOR5        | 1.48E-27 | 0.32446  | 0.957 | 0.896 | 2.69E-23 | Conj-3 |
| COX5B          | 2.56E-27 | 0.270324 | 1     | 0.962 | 4.66E-23 | Conj-3 |
| EHF            | 3.42E-27 | 0.44805  | 0.626 | 0.331 | 6.22E-23 | Conj-3 |
| CTAGE5         | 4.02E-27 | 0.252078 | 0.457 | 0.194 | 7.31E-23 | Conj-3 |
| SCGB2A1        | 4.12E-27 | 0.545546 | 0.745 | 0.442 | 7.51E-23 | Conj-3 |
| HSBP1L1        | 5.00E-27 | 0.416329 | 0.773 | 0.519 | 9.11E-23 | Conj-3 |
| C1GALT1        | 1.22E-26 | 0.286725 | 0.493 | 0.228 | 2.23E-22 | Conj-3 |
| ANXA11         | 1.90E-26 | 0.339716 | 0.921 | 0.771 | 3.46E-22 | Conj-3 |
| UBE2L6         | 4.42E-26 | 0.312678 | 0.594 | 0.31  | 8.06E-22 | Conj-3 |
| C1orf106       | 4.80E-26 | 0.257592 | 0.403 | 0.163 | 8.74E-22 | Conj-3 |
| PDLIM5         | 4.87E-26 | 0.309994 | 0.583 | 0.289 | 8.87E-22 | Conj-3 |
| CALML3         | 8.82E-26 | 0.471015 | 0.896 | 0.699 | 1.61E-21 | Conj-3 |
| TNFSF10        | 1.66E-25 | 0.405869 | 0.856 | 0.649 | 3.02E-21 | Conj-3 |
| ZNF503         | 1.71E-25 | 0.250082 | 0.457 | 0.201 | 3.12E-21 | Conj-3 |
| GADD45B        | 2.75E-25 | 0.36874  | 0.971 | 0.927 | 5.01E-21 | Conj-3 |
| UQCRB          | 2.84E-25 | 0.267365 | 0.982 | 0.968 | 5.18E-21 | Conj-3 |
| SLC27A5        | 6.45E-25 | 0.293263 | 0.363 | 0.146 | 1.17E-20 | Conj-3 |
| CCDC12         | 6.69E-25 | 0.377499 | 0.838 | 0.609 | 1.22E-20 | Conj-3 |
| DYNLT1         | 9.16E-25 | 0.336509 | 0.935 | 0.804 | 1.67E-20 | Conj-3 |
| GRN            | 2.14E-24 | 0.378479 | 0.881 | 0.763 | 3.89E-20 | Conj-3 |
| DDIT3          | 2.31E-24 | 0.508844 | 0.773 | 0.545 | 4.21E-20 | Conj-3 |
| PDLIM1         | 2.62E-24 | 0.358584 | 0.917 | 0.77  | 4.77E-20 | Conj-3 |
| RBP1           | 3.17E-24 | 0.257759 | 0.317 | 0.119 | 5.76E-20 | Conj-3 |
| RHOBTB3        | 3.62E-24 | 0.26434  | 0.464 | 0.206 | 6.59E-20 | Conj-3 |
| ENSG0000019876 | 3.98E-24 | 0.413969 | 1     | 0.983 | 7.26E-20 | Conj-3 |
| LOC100505633   | 4.03E-24 | 0.301279 | 0.604 | 0.328 | 7.34E-20 | Conj-3 |
| BLOC1S1        | 6.19E-24 | 0.320425 | 0.863 | 0.625 | 1.13E-19 | Conj-3 |
| CRIP1          | 7.39E-24 | 0.819881 | 0.899 | 0.749 | 1.35E-19 | Conj-3 |

|                |          |          |       |       |          |        |
|----------------|----------|----------|-------|-------|----------|--------|
| PTGR1          | 9.78E-24 | 0.410935 | 0.633 | 0.399 | 1.78E-19 | Conj-3 |
| CCDC80         | 1.46E-23 | 0.264439 | 0.327 | 0.126 | 2.65E-19 | Conj-3 |
| UAP1           | 1.56E-23 | 0.31446  | 0.647 | 0.355 | 2.84E-19 | Conj-3 |
| HLA-C          | 2.54E-23 | 0.384253 | 0.957 | 0.956 | 4.63E-19 | Conj-3 |
| SERPINB2       | 4.25E-23 | 0.434208 | 0.313 | 0.115 | 7.74E-19 | Conj-3 |
| TNNT3          | 4.81E-23 | 0.315371 | 0.737 | 0.451 | 8.76E-19 | Conj-3 |
| FAM46B         | 7.01E-23 | 0.324647 | 0.637 | 0.362 | 1.28E-18 | Conj-3 |
| RARRES1        | 7.42E-23 | 0.712824 | 0.439 | 0.194 | 1.35E-18 | Conj-3 |
| ID1            | 8.21E-23 | 0.403924 | 0.982 | 0.959 | 1.49E-18 | Conj-3 |
| SPINT1         | 8.83E-23 | 0.311154 | 0.878 | 0.646 | 1.61E-18 | Conj-3 |
| ARPC1B         | 1.09E-22 | 0.348695 | 0.791 | 0.597 | 1.98E-18 | Conj-3 |
| ENSG0000019888 | 1.16E-22 | 0.402827 | 0.996 | 0.96  | 2.11E-18 | Conj-3 |
| COX6C          | 1.17E-22 | 0.29639  | 0.993 | 0.967 | 2.14E-18 | Conj-3 |
| TSPAN1         | 1.20E-22 | 0.502035 | 0.781 | 0.535 | 2.18E-18 | Conj-3 |
| LY6E           | 2.96E-22 | 0.294005 | 0.831 | 0.538 | 5.40E-18 | Conj-3 |
| ENSG0000019884 | 5.62E-22 | 0.436535 | 0.986 | 0.882 | 1.02E-17 | Conj-3 |
| SLC35C1        | 5.66E-22 | 0.273274 | 0.453 | 0.22  | 1.03E-17 | Conj-3 |
| PRDX5          | 1.45E-21 | 0.255719 | 1     | 0.976 | 2.65E-17 | Conj-3 |
| PIK3IP1        | 1.70E-21 | 0.271909 | 0.633 | 0.371 | 3.10E-17 | Conj-3 |
| HS3ST1         | 3.08E-21 | 0.322923 | 0.385 | 0.166 | 5.60E-17 | Conj-3 |
| EFNA1          | 4.90E-21 | 0.41525  | 0.863 | 0.699 | 8.92E-17 | Conj-3 |
| UQCRCQ         | 4.99E-21 | 0.270909 | 0.982 | 0.949 | 9.09E-17 | Conj-3 |
| ROMO1          | 8.05E-21 | 0.341315 | 0.903 | 0.78  | 1.47E-16 | Conj-3 |
| CD82           | 1.05E-20 | 0.317368 | 0.777 | 0.553 | 1.90E-16 | Conj-3 |
| C11orf31       | 1.28E-20 | 0.304645 | 0.914 | 0.785 | 2.32E-16 | Conj-3 |
| PLK2           | 1.61E-20 | 0.400446 | 0.773 | 0.528 | 2.94E-16 | Conj-3 |
| TRIP10         | 2.32E-20 | 0.287813 | 0.594 | 0.347 | 4.23E-16 | Conj-3 |
| ZC3H12A        | 2.71E-20 | 0.336261 | 0.504 | 0.265 | 4.93E-16 | Conj-3 |
| GADD45G        | 5.50E-20 | 0.426611 | 0.637 | 0.407 | 1.00E-15 | Conj-3 |
| RASD1          | 5.58E-20 | 0.415002 | 0.673 | 0.439 | 1.02E-15 | Conj-3 |
| MDH2           | 6.88E-20 | 0.260975 | 0.835 | 0.619 | 1.25E-15 | Conj-3 |
| NFKBIZ         | 7.41E-20 | 0.328944 | 0.579 | 0.34  | 1.35E-15 | Conj-3 |
| NRARP          | 7.99E-20 | 0.28923  | 0.396 | 0.18  | 1.46E-15 | Conj-3 |
| PSMB8          | 1.46E-19 | 0.302987 | 0.701 | 0.478 | 2.65E-15 | Conj-3 |
| OVOL1          | 2.16E-19 | 0.27244  | 0.629 | 0.36  | 3.93E-15 | Conj-3 |
| PNKD           | 2.17E-19 | 0.29663  | 0.888 | 0.743 | 3.95E-15 | Conj-3 |
| P4HB           | 3.18E-19 | 0.303582 | 0.795 | 0.616 | 5.80E-15 | Conj-3 |
| UQCR10         | 4.08E-19 | 0.263625 | 0.968 | 0.902 | 7.43E-15 | Conj-3 |
| GSTT1          | 4.78E-19 | 0.28205  | 0.511 | 0.275 | 8.71E-15 | Conj-3 |
| MGST1          | 8.24E-19 | 0.454489 | 0.468 | 0.253 | 1.50E-14 | Conj-3 |
| AREG           | 8.28E-19 | 0.367867 | 0.701 | 0.441 | 1.51E-14 | Conj-3 |
| SRSF5          | 9.00E-19 | 0.280992 | 0.964 | 0.938 | 1.64E-14 | Conj-3 |
| DHCR24         | 9.15E-19 | 0.255816 | 0.403 | 0.191 | 1.67E-14 | Conj-3 |
| COX6A1         | 1.11E-18 | 0.256751 | 1     | 0.977 | 2.02E-14 | Conj-3 |
| CLEC2B         | 1.75E-18 | 0.266329 | 0.871 | 0.638 | 3.18E-14 | Conj-3 |
| TRAF4          | 2.70E-18 | 0.352992 | 0.604 | 0.362 | 4.92E-14 | Conj-3 |
| SF3B3          | 2.73E-18 | 0.27738  | 0.295 | 0.124 | 4.97E-14 | Conj-3 |
| COX6B1         | 4.73E-18 | 0.264415 | 0.975 | 0.949 | 8.61E-14 | Conj-3 |

|                |          |          |       |       |          |        |
|----------------|----------|----------|-------|-------|----------|--------|
| FMO1           | 5.63E-18 | 0.296664 | 0.385 | 0.176 | 1.03E-13 | Conj-3 |
| S100A14        | 8.36E-18 | 0.256674 | 0.978 | 0.776 | 1.52E-13 | Conj-3 |
| PYGL           | 1.00E-17 | 0.294361 | 0.701 | 0.48  | 1.83E-13 | Conj-3 |
| PPIC           | 1.15E-17 | 0.276398 | 0.543 | 0.309 | 2.10E-13 | Conj-3 |
| CASP3          | 1.41E-17 | 0.267187 | 0.475 | 0.26  | 2.57E-13 | Conj-3 |
| TALDO1         | 1.55E-17 | 0.259262 | 0.885 | 0.8   | 2.83E-13 | Conj-3 |
| ZFP36          | 2.08E-17 | 0.270261 | 0.993 | 0.975 | 3.78E-13 | Conj-3 |
| ENSG0000021008 | 2.13E-17 | 0.368013 | 1     | 1     | 3.88E-13 | Conj-3 |
| GSTK1          | 3.47E-17 | 0.308784 | 0.773 | 0.63  | 6.32E-13 | Conj-3 |
| TCEA3          | 4.93E-17 | 0.282581 | 0.719 | 0.496 | 8.98E-13 | Conj-3 |
| IFI27          | 1.26E-16 | 0.577322 | 0.741 | 0.527 | 2.30E-12 | Conj-3 |
| PGD            | 2.42E-16 | 0.271437 | 0.759 | 0.581 | 4.41E-12 | Conj-3 |
| SCAND1         | 4.87E-16 | 0.287396 | 0.863 | 0.711 | 8.87E-12 | Conj-3 |
| ZFAS1          | 7.16E-16 | 0.263518 | 0.942 | 0.865 | 1.30E-11 | Conj-3 |
| NDUFB2         | 9.70E-16 | 0.283756 | 0.957 | 0.863 | 1.77E-11 | Conj-3 |
| SERP1          | 1.00E-15 | 0.269064 | 0.903 | 0.834 | 1.83E-11 | Conj-3 |
| COMTD1         | 1.40E-15 | 0.282671 | 0.482 | 0.289 | 2.55E-11 | Conj-3 |
| ENSG0000021145 | 1.50E-15 | 0.432069 | 1     | 0.997 | 2.74E-11 | Conj-3 |
| MRPS18A        | 1.63E-15 | 0.262305 | 0.561 | 0.33  | 2.96E-11 | Conj-3 |
| TMED3          | 1.98E-15 | 0.253619 | 0.874 | 0.779 | 3.60E-11 | Conj-3 |
| PSME2          | 2.91E-15 | 0.271933 | 0.842 | 0.679 | 5.31E-11 | Conj-3 |
| PVRL4          | 2.98E-15 | 0.257616 | 0.755 | 0.502 | 5.43E-11 | Conj-3 |
| ISG15          | 4.16E-15 | 0.320522 | 0.378 | 0.186 | 7.58E-11 | Conj-3 |
| ARL4A          | 5.26E-15 | 0.260467 | 0.795 | 0.614 | 9.57E-11 | Conj-3 |
| BBC3           | 8.36E-15 | 0.306617 | 0.342 | 0.17  | 1.52E-10 | Conj-3 |
| EPHA2          | 1.33E-14 | 0.389347 | 0.514 | 0.303 | 2.42E-10 | Conj-3 |
| NDUFS7         | 1.49E-14 | 0.275822 | 0.781 | 0.602 | 2.72E-10 | Conj-3 |
| CEBPB          | 3.02E-14 | 0.306979 | 0.835 | 0.644 | 5.49E-10 | Conj-3 |
| ASAH1          | 4.95E-14 | 0.300515 | 0.799 | 0.671 | 9.02E-10 | Conj-3 |
| SHFM1          | 6.75E-14 | 0.2657   | 0.964 | 0.86  | 1.23E-09 | Conj-3 |
| SEPW1          | 7.10E-14 | 0.295972 | 0.594 | 0.39  | 1.29E-09 | Conj-3 |
| PDCD4          | 9.28E-14 | 0.317192 | 0.849 | 0.709 | 1.69E-09 | Conj-3 |
| TPD52L1        | 1.09E-13 | 0.25177  | 0.77  | 0.551 | 1.98E-09 | Conj-3 |
| SLC1A5         | 1.51E-13 | 0.254305 | 0.651 | 0.457 | 2.76E-09 | Conj-3 |
| NOL3           | 2.30E-13 | 0.252881 | 0.558 | 0.347 | 4.19E-09 | Conj-3 |
| UNC5B-AS1      | 2.57E-13 | 0.429948 | 0.514 | 0.316 | 4.69E-09 | Conj-3 |
| BTG2           | 6.16E-13 | 0.282983 | 0.813 | 0.649 | 1.12E-08 | Conj-3 |
| TPM4           | 8.97E-13 | 0.275951 | 0.701 | 0.489 | 1.63E-08 | Conj-3 |
| BIK            | 4.10E-12 | 0.253578 | 0.5   | 0.317 | 7.46E-08 | Conj-3 |
| HINT2          | 5.70E-11 | 0.256546 | 0.712 | 0.555 | 1.04E-06 | Conj-3 |
| NR4A1          | 1.87E-08 | 0.251323 | 0.619 | 0.451 | 0.000341 | Conj-3 |
| ANXA1          | 4.65E-07 | 0.25526  | 0.996 | 0.983 | 0.008459 | Conj-3 |
| PLAUR          | 6.48E-06 | 0.272611 | 0.406 | 0.288 | 0.118048 | Conj-3 |
| TM4SF1         | 0.004687 | 0.464461 | 0.745 | 0.686 | 1        | Conj-3 |
| GPHA2          | 0        | 4.430929 | 0.977 | 0.089 | 0        | LPC-1  |
| SCRG1          | 0        | 3.379752 | 0.837 | 0.015 | 0        | LPC-1  |
| FRZB           | 0        | 2.374968 | 0.702 | 0.006 | 0        | LPC-1  |
| PTN            | 0        | 1.529795 | 0.744 | 0.085 | 0        | LPC-1  |



|              |           |          |       |       |           |       |
|--------------|-----------|----------|-------|-------|-----------|-------|
| FAM107A      | 0         | 1.208996 | 0.698 | 0.071 | 0         | LPC-1 |
| LECT1        | 0         | 1.205382 | 0.368 | 0.001 | 0         | LPC-1 |
| NPPC         | 0         | 1.119087 | 0.519 | 0.004 | 0         | LPC-1 |
| GPHB5        | 0         | 1.05201  | 0.461 | 0.002 | 0         | LPC-1 |
| CDH19        | 0         | 0.815304 | 0.465 | 0.002 | 0         | LPC-1 |
| LINC00681    | 0         | 0.579657 | 0.318 | 0.007 | 0         | LPC-1 |
| NELL1        | 0         | 0.561537 | 0.364 | 0.004 | 0         | LPC-1 |
| PDE1A        | 0         | 0.483091 | 0.318 | 0.009 | 0         | LPC-1 |
| LRRC3B       | 0         | 0.420148 | 0.302 | 0.006 | 0         | LPC-1 |
| GMPR         | 3.51E-293 | 0.931374 | 0.64  | 0.065 | 6.39E-289 | LPC-1 |
| MMP10        | 2.06E-247 | 1.06567  | 0.477 | 0.04  | 3.75E-243 | LPC-1 |
| ITM2A        | 7.98E-209 | 0.482828 | 0.295 | 0.017 | 1.45E-204 | LPC-1 |
| KRT15        | 3.03E-175 | 2.176398 | 1     | 0.423 | 5.51E-171 | LPC-1 |
| SPARCL1      | 1.86E-172 | 1.332277 | 0.942 | 0.258 | 3.39E-168 | LPC-1 |
| SLC6A6       | 5.58E-169 | 1.206638 | 0.705 | 0.148 | 1.02E-164 | LPC-1 |
| LGALS3BP     | 8.46E-145 | 1.419891 | 0.95  | 0.498 | 1.54E-140 | LPC-1 |
| OLFM1        | 1.52E-144 | 0.58128  | 0.442 | 0.059 | 2.78E-140 | LPC-1 |
| GAPDH        | 6.94E-139 | 1.164991 | 1     | 0.998 | 1.26E-134 | LPC-1 |
| S100A2       | 1.24E-131 | 1.309599 | 0.981 | 0.422 | 2.26E-127 | LPC-1 |
| FAM46A       | 1.27E-131 | 1.48365  | 0.907 | 0.422 | 2.31E-127 | LPC-1 |
| RPL5         | 3.12E-126 | 0.852979 | 1     | 0.993 | 5.69E-122 | LPC-1 |
| RPL34        | 1.14E-120 | 0.666029 | 1     | 1     | 2.08E-116 | LPC-1 |
| ITM2C        | 3.65E-118 | 0.411353 | 0.291 | 0.03  | 6.64E-114 | LPC-1 |
| EEF1A1       | 4.43E-117 | 0.717079 | 1     | 0.999 | 8.07E-113 | LPC-1 |
| DKK3         | 8.71E-114 | 1.409494 | 0.965 | 0.642 | 1.59E-109 | LPC-1 |
| PLTP         | 5.28E-113 | 0.725798 | 0.554 | 0.121 | 9.62E-109 | LPC-1 |
| GAS5         | 2.11E-111 | 1.039072 | 0.996 | 0.934 | 3.84E-107 | LPC-1 |
| RPLP1        | 1.97E-107 | 0.581576 | 1     | 1     | 3.59E-103 | LPC-1 |
| EGFL7        | 5.00E-106 | 0.50783  | 0.345 | 0.048 | 9.10E-102 | LPC-1 |
| RPL13        | 3.00E-105 | 0.619565 | 1     | 0.999 | 5.47E-101 | LPC-1 |
| RPL15        | 3.97E-105 | 0.52047  | 1     | 0.998 | 7.23E-101 | LPC-1 |
| C17orf76-AS1 | 2.49E-103 | 0.812669 | 0.996 | 0.964 | 4.53E-99  | LPC-1 |
| IGFBP7       | 5.85E-103 | 1.588717 | 0.981 | 0.653 | 1.07E-98  | LPC-1 |
| ISYNA1       | 1.14E-102 | 0.49552  | 0.36  | 0.054 | 2.08E-98  | LPC-1 |
| RPS27        | 1.79E-102 | 0.578346 | 1     | 1     | 3.25E-98  | LPC-1 |
| RPL35A       | 3.98E-102 | 0.555623 | 0.996 | 0.998 | 7.25E-98  | LPC-1 |
| RPL3         | 3.94E-101 | 0.52855  | 1     | 0.999 | 7.18E-97  | LPC-1 |
| EEF1G        | 2.35E-100 | 0.670595 | 1     | 0.988 | 4.28E-96  | LPC-1 |
| CXCL1        | 5.16E-99  | 1.073378 | 0.562 | 0.126 | 9.39E-95  | LPC-1 |
| COL9A3       | 5.87E-99  | 0.452274 | 0.302 | 0.04  | 1.07E-94  | LPC-1 |
| RPS27A       | 1.40E-98  | 0.603198 | 1     | 0.997 | 2.55E-94  | LPC-1 |
| NPC2         | 2.47E-98  | 0.87767  | 0.977 | 0.868 | 4.49E-94  | LPC-1 |
| RPL11        | 6.09E-97  | 0.493387 | 1     | 0.999 | 1.11E-92  | LPC-1 |
| RPL10        | 1.05E-96  | 0.558922 | 1     | 1     | 1.91E-92  | LPC-1 |
| RPL13A       | 4.52E-95  | 0.525373 | 1     | 0.999 | 8.24E-91  | LPC-1 |
| RPL31        | 2.35E-93  | 0.555972 | 0.996 | 0.998 | 4.28E-89  | LPC-1 |
| RPL6         | 3.03E-92  | 0.624474 | 1     | 0.992 | 5.52E-88  | LPC-1 |
| RPL32        | 3.95E-92  | 0.550342 | 1     | 0.999 | 7.19E-88  | LPC-1 |

|                |          |          |       |       |          |       |
|----------------|----------|----------|-------|-------|----------|-------|
| PTK2B          | 8.18E-92 | 0.471418 | 0.329 | 0.05  | 1.49E-87 | LPC-1 |
| RPL14          | 2.41E-91 | 0.591861 | 0.996 | 0.995 | 4.40E-87 | LPC-1 |
| CXCL14         | 4.96E-91 | 1.161002 | 0.996 | 0.889 | 9.04E-87 | LPC-1 |
| NAP1L1         | 1.90E-90 | 0.894836 | 0.93  | 0.732 | 3.46E-86 | LPC-1 |
| SNCA           | 2.17E-90 | 0.338472 | 0.26  | 0.031 | 3.96E-86 | LPC-1 |
| RPS3A          | 4.68E-90 | 0.54035  | 1     | 0.998 | 8.52E-86 | LPC-1 |
| CERCAM         | 6.03E-90 | 0.446298 | 0.376 | 0.066 | 1.10E-85 | LPC-1 |
| RPS23          | 1.81E-88 | 0.484495 | 1     | 0.998 | 3.30E-84 | LPC-1 |
| RPL30          | 3.37E-88 | 0.519335 | 1     | 0.998 | 6.14E-84 | LPC-1 |
| RPS6           | 1.00E-86 | 0.552789 | 1     | 0.999 | 1.83E-82 | LPC-1 |
| KRT14          | 3.44E-86 | 0.906606 | 1     | 0.573 | 6.27E-82 | LPC-1 |
| VIM            | 2.59E-85 | 0.791125 | 0.899 | 0.322 | 4.72E-81 | LPC-1 |
| RPS12          | 3.11E-85 | 0.556936 | 1     | 0.999 | 5.66E-81 | LPC-1 |
| HLA-C          | 2.11E-84 | 0.743249 | 0.996 | 0.956 | 3.83E-80 | LPC-1 |
| TIMP1          | 1.33E-83 | 0.899673 | 0.957 | 0.637 | 2.41E-79 | LPC-1 |
| NPM1           | 3.87E-83 | 0.735164 | 0.992 | 0.927 | 7.05E-79 | LPC-1 |
| RPL22          | 2.16E-81 | 0.532872 | 1     | 0.994 | 3.94E-77 | LPC-1 |
| RPS3           | 7.89E-80 | 0.533133 | 1     | 0.996 | 1.44E-75 | LPC-1 |
| RPS9           | 1.46E-79 | 0.473582 | 1     | 0.998 | 2.65E-75 | LPC-1 |
| PLD3           | 1.80E-79 | 1.032122 | 0.857 | 0.542 | 3.28E-75 | LPC-1 |
| HLA-A          | 2.20E-79 | 0.773521 | 0.992 | 0.961 | 4.00E-75 | LPC-1 |
| CTSF           | 9.22E-79 | 0.776763 | 0.841 | 0.376 | 1.68E-74 | LPC-1 |
| GEM            | 8.84E-78 | 0.607456 | 0.31  | 0.051 | 1.61E-73 | LPC-1 |
| APP            | 8.95E-78 | 1.003787 | 0.884 | 0.562 | 1.63E-73 | LPC-1 |
| RPL37          | 1.69E-77 | 0.512665 | 1     | 0.995 | 3.07E-73 | LPC-1 |
| RPL4           | 1.94E-77 | 0.542033 | 0.992 | 0.986 | 3.53E-73 | LPC-1 |
| ENSG0000019893 | 2.37E-77 | 0.713878 | 1     | 0.998 | 4.32E-73 | LPC-1 |
| RPS4X          | 1.28E-76 | 0.537939 | 1     | 0.999 | 2.33E-72 | LPC-1 |
| RPL21          | 2.01E-76 | 0.452135 | 1     | 0.999 | 3.67E-72 | LPC-1 |
| SOX9           | 1.86E-75 | 0.618761 | 0.477 | 0.12  | 3.38E-71 | LPC-1 |
| RPLP2          | 2.74E-75 | 0.465296 | 1     | 0.999 | 4.99E-71 | LPC-1 |
| MEIS2          | 6.96E-74 | 0.586993 | 0.422 | 0.099 | 1.27E-69 | LPC-1 |
| RPS15          | 1.24E-73 | 0.402436 | 1     | 0.999 | 2.26E-69 | LPC-1 |
| JUN            | 1.68E-73 | 0.824505 | 0.996 | 0.979 | 3.05E-69 | LPC-1 |
| RPS14          | 1.80E-73 | 0.425585 | 1     | 1     | 3.29E-69 | LPC-1 |
| RPL12          | 1.63E-72 | 0.467285 | 1     | 0.998 | 2.98E-68 | LPC-1 |
| RPL8           | 3.17E-72 | 0.423674 | 1     | 0.998 | 5.77E-68 | LPC-1 |
| FOS            | 4.30E-69 | 0.768013 | 1     | 0.974 | 7.82E-65 | LPC-1 |
| RPL17          | 2.10E-68 | 0.512484 | 0.988 | 0.985 | 3.82E-64 | LPC-1 |
| RPS15A         | 5.19E-68 | 0.463381 | 1     | 0.997 | 9.45E-64 | LPC-1 |
| RPL23A         | 6.22E-68 | 0.416513 | 1     | 0.998 | 1.13E-63 | LPC-1 |
| RPL27A         | 2.10E-67 | 0.414579 | 1     | 0.998 | 3.83E-63 | LPC-1 |
| RPL7           | 1.04E-66 | 0.418003 | 1     | 0.998 | 1.89E-62 | LPC-1 |
| HLA-B          | 1.06E-66 | 0.762842 | 0.988 | 0.924 | 1.94E-62 | LPC-1 |
| C6orf48        | 3.37E-66 | 0.792712 | 0.891 | 0.647 | 6.14E-62 | LPC-1 |
| GLTSCR2        | 1.88E-65 | 0.712308 | 0.95  | 0.826 | 3.42E-61 | LPC-1 |
| RPS13          | 2.14E-65 | 0.388157 | 1     | 0.998 | 3.90E-61 | LPC-1 |
| RPL19          | 4.79E-65 | 0.384136 | 1     | 0.999 | 8.71E-61 | LPC-1 |

|                 |          |          |       |       |          |       |
|-----------------|----------|----------|-------|-------|----------|-------|
| RPL39           | 1.32E-63 | 0.381317 | 1     | 0.999 | 2.41E-59 | LPC-1 |
| RPL26           | 2.11E-63 | 0.401075 | 1     | 0.999 | 3.84E-59 | LPC-1 |
| ID2             | 3.80E-63 | 1.05513  | 0.864 | 0.555 | 6.92E-59 | LPC-1 |
| SPINK2          | 4.97E-63 | 0.560919 | 0.364 | 0.084 | 9.05E-59 | LPC-1 |
| RPS25           | 9.94E-63 | 0.393367 | 1     | 0.998 | 1.81E-58 | LPC-1 |
| RPL36           | 2.03E-62 | 0.420018 | 0.996 | 0.997 | 3.70E-58 | LPC-1 |
| FCGRT           | 9.52E-62 | 0.691618 | 0.671 | 0.305 | 1.73E-57 | LPC-1 |
| TPM2            | 2.26E-61 | 0.422984 | 0.298 | 0.057 | 4.12E-57 | LPC-1 |
| COL18A1         | 5.01E-61 | 0.394225 | 0.333 | 0.071 | 9.12E-57 | LPC-1 |
| ENSG00000211451 | 9.18E-61 | 0.796974 | 1     | 0.997 | 1.67E-56 | LPC-1 |
| RPS20           | 1.69E-60 | 0.406754 | 0.996 | 0.997 | 3.07E-56 | LPC-1 |
| SNAI2           | 3.27E-60 | 0.804529 | 0.721 | 0.356 | 5.96E-56 | LPC-1 |
| PTMA            | 5.20E-59 | 0.495292 | 1     | 0.996 | 9.47E-55 | LPC-1 |
| CITED2          | 6.11E-59 | 0.985729 | 0.891 | 0.646 | 1.11E-54 | LPC-1 |
| NDUFA4L2        | 4.55E-58 | 0.788232 | 0.93  | 0.651 | 8.28E-54 | LPC-1 |
| RPL10A          | 4.84E-58 | 0.393542 | 1     | 0.995 | 8.81E-54 | LPC-1 |
| RPS8            | 2.52E-57 | 0.391296 | 1     | 0.999 | 4.59E-53 | LPC-1 |
| EFEMP2          | 2.74E-56 | 0.373415 | 0.326 | 0.072 | 5.00E-52 | LPC-1 |
| PHLDA1          | 5.81E-56 | 0.664788 | 0.574 | 0.201 | 1.06E-51 | LPC-1 |
| NENF            | 1.95E-55 | 0.69629  | 0.868 | 0.71  | 3.56E-51 | LPC-1 |
| WFDC2           | 6.00E-55 | 0.485508 | 0.357 | 0.086 | 1.09E-50 | LPC-1 |
| FTL             | 1.29E-54 | 0.594523 | 1     | 0.996 | 2.34E-50 | LPC-1 |
| NACA            | 1.63E-54 | 0.3634   | 1     | 0.996 | 2.97E-50 | LPC-1 |
| APOE            | 2.06E-54 | 0.33212  | 0.271 | 0.053 | 3.74E-50 | LPC-1 |
| RBP1            | 2.20E-54 | 0.466959 | 0.411 | 0.117 | 4.01E-50 | LPC-1 |
| RPS7            | 6.47E-54 | 0.410539 | 1     | 0.993 | 1.18E-49 | LPC-1 |
| RPL41           | 7.93E-54 | 0.309769 | 1     | 1     | 1.44E-49 | LPC-1 |
| RPS19           | 2.95E-53 | 0.404298 | 1     | 0.998 | 5.37E-49 | LPC-1 |
| ENSG00000210081 | 4.85E-53 | 0.72293  | 1     | 1     | 8.82E-49 | LPC-1 |
| CXCL3           | 6.28E-53 | 0.526573 | 0.349 | 0.083 | 1.14E-48 | LPC-1 |
| ENSG00000198761 | 3.27E-52 | 0.555662 | 1     | 0.983 | 5.95E-48 | LPC-1 |
| RPS11           | 4.33E-52 | 0.456419 | 0.996 | 0.985 | 7.89E-48 | LPC-1 |
| RPS17L          | 2.14E-51 | 0.380946 | 1     | 0.996 | 3.89E-47 | LPC-1 |
| UBA52           | 2.13E-50 | 0.390105 | 1     | 0.987 | 3.88E-46 | LPC-1 |
| RPL18           | 9.73E-50 | 0.380464 | 1     | 0.996 | 1.77E-45 | LPC-1 |
| CD59            | 1.32E-49 | 0.580245 | 0.93  | 0.731 | 2.41E-45 | LPC-1 |
| SERTAD4         | 3.23E-49 | 0.471059 | 0.349 | 0.093 | 5.89E-45 | LPC-1 |
| IVNS1ABP        | 2.24E-48 | 0.700717 | 0.756 | 0.455 | 4.08E-44 | LPC-1 |
| ATP1B1          | 1.51E-47 | 0.607316 | 0.547 | 0.226 | 2.74E-43 | LPC-1 |
| SNHG6           | 1.54E-47 | 0.557629 | 0.915 | 0.758 | 2.80E-43 | LPC-1 |
| SERPINF1        | 1.88E-47 | 0.403476 | 0.88  | 0.52  | 3.42E-43 | LPC-1 |
| SPATS2L         | 1.31E-46 | 0.603807 | 0.647 | 0.341 | 2.38E-42 | LPC-1 |
| SNHG8           | 3.42E-46 | 0.605053 | 0.857 | 0.698 | 6.22E-42 | LPC-1 |
| DLX4            | 3.56E-46 | 0.297032 | 0.267 | 0.059 | 6.48E-42 | LPC-1 |
| C12orf57        | 4.00E-46 | 0.566043 | 0.895 | 0.74  | 7.28E-42 | LPC-1 |
| RPS21           | 4.32E-46 | 0.376575 | 1     | 0.989 | 7.87E-42 | LPC-1 |
| GNB2L1          | 9.27E-45 | 0.359131 | 0.996 | 0.99  | 1.69E-40 | LPC-1 |
| OS9             | 1.23E-44 | 0.689755 | 0.818 | 0.639 | 2.24E-40 | LPC-1 |

|                |          |          |       |       |          |       |
|----------------|----------|----------|-------|-------|----------|-------|
| PFDN5          | 2.72E-44 | 0.433933 | 0.988 | 0.974 | 4.95E-40 | LPC-1 |
| EPB41L4A-AS1   | 2.91E-44 | 0.587652 | 0.767 | 0.521 | 5.30E-40 | LPC-1 |
| KRT8           | 6.22E-44 | 0.518339 | 0.748 | 0.392 | 1.13E-39 | LPC-1 |
| EIF3E          | 6.44E-44 | 0.529211 | 0.907 | 0.821 | 1.17E-39 | LPC-1 |
| RPS16          | 6.60E-44 | 0.354798 | 1     | 0.994 | 1.20E-39 | LPC-1 |
| PSAP           | 6.61E-44 | 0.556967 | 0.973 | 0.953 | 1.20E-39 | LPC-1 |
| EIF3L          | 2.42E-42 | 0.512944 | 0.919 | 0.817 | 4.41E-38 | LPC-1 |
| RPS5           | 7.32E-42 | 0.372883 | 0.996 | 0.99  | 1.33E-37 | LPC-1 |
| RPS10          | 9.03E-42 | 0.398575 | 0.992 | 0.978 | 1.64E-37 | LPC-1 |
| SSR4           | 3.08E-41 | 0.534901 | 0.95  | 0.894 | 5.61E-37 | LPC-1 |
| ZFAS1          | 1.80E-40 | 0.487708 | 0.957 | 0.865 | 3.27E-36 | LPC-1 |
| GLCE           | 2.04E-40 | 0.555346 | 0.512 | 0.226 | 3.71E-36 | LPC-1 |
| RPS28          | 5.46E-40 | 0.326486 | 1     | 0.999 | 9.93E-36 | LPC-1 |
| SELM           | 6.53E-40 | 0.355819 | 0.729 | 0.337 | 1.19E-35 | LPC-1 |
| NTRK2          | 6.87E-40 | 0.58654  | 0.636 | 0.297 | 1.25E-35 | LPC-1 |
| RPL24          | 1.49E-39 | 0.35317  | 0.992 | 0.994 | 2.71E-35 | LPC-1 |
| RPL7A          | 3.98E-39 | 0.340605 | 0.996 | 0.987 | 7.24E-35 | LPC-1 |
| MALAT1         | 1.12E-38 | 0.47352  | 1     | 0.998 | 2.04E-34 | LPC-1 |
| LTB4R          | 1.12E-38 | 0.387963 | 0.337 | 0.103 | 2.04E-34 | LPC-1 |
| RPL9           | 1.42E-38 | 0.519695 | 0.919 | 0.785 | 2.58E-34 | LPC-1 |
| MYL9           | 1.53E-38 | 0.34683  | 0.31  | 0.085 | 2.78E-34 | LPC-1 |
| RPS18          | 2.12E-38 | 0.287923 | 1     | 1     | 3.87E-34 | LPC-1 |
| EEF1D          | 2.66E-38 | 0.375395 | 0.984 | 0.978 | 4.84E-34 | LPC-1 |
| FBXO2          | 2.67E-38 | 0.487918 | 0.488 | 0.21  | 4.86E-34 | LPC-1 |
| NUCB1          | 1.17E-36 | 0.558567 | 0.632 | 0.381 | 2.13E-32 | LPC-1 |
| COMMD6         | 2.64E-36 | 0.452751 | 0.957 | 0.925 | 4.81E-32 | LPC-1 |
| CBR1           | 3.53E-36 | 0.528727 | 0.853 | 0.688 | 6.43E-32 | LPC-1 |
| FOSB           | 8.39E-36 | 0.552987 | 0.926 | 0.83  | 1.53E-31 | LPC-1 |
| ATP1B3         | 9.69E-36 | 0.56502  | 0.93  | 0.823 | 1.76E-31 | LPC-1 |
| RPL36A         | 1.55E-35 | 0.351063 | 1     | 0.989 | 2.82E-31 | LPC-1 |
| DEGS1          | 2.34E-35 | 0.456488 | 0.682 | 0.375 | 4.26E-31 | LPC-1 |
| RPL29          | 3.96E-35 | 0.33956  | 0.996 | 0.993 | 7.21E-31 | LPC-1 |
| ENSG0000019888 | 4.88E-35 | 0.494538 | 0.992 | 0.96  | 8.88E-31 | LPC-1 |
| TPT1           | 1.30E-34 | 0.306501 | 1     | 0.997 | 2.37E-30 | LPC-1 |
| RPL23          | 1.41E-34 | 0.33195  | 0.992 | 0.985 | 2.57E-30 | LPC-1 |
| CPXM2          | 2.51E-34 | 0.689916 | 0.674 | 0.439 | 4.57E-30 | LPC-1 |
| TOMM7          | 9.06E-34 | 0.388447 | 0.981 | 0.969 | 1.65E-29 | LPC-1 |
| RPS24          | 9.63E-34 | 0.296336 | 0.996 | 0.998 | 1.75E-29 | LPC-1 |
| STXBP6         | 1.12E-33 | 0.361298 | 0.264 | 0.073 | 2.05E-29 | LPC-1 |
| SNORA33        | 4.99E-33 | 0.440511 | 0.888 | 0.766 | 9.09E-29 | LPC-1 |
| BAMBI          | 5.12E-33 | 0.494053 | 0.411 | 0.168 | 9.32E-29 | LPC-1 |
| TMEM98         | 1.02E-32 | 0.448306 | 0.411 | 0.164 | 1.86E-28 | LPC-1 |
| SNRPN          | 3.78E-32 | 0.512938 | 0.76  | 0.581 | 6.88E-28 | LPC-1 |
| PIGT           | 4.85E-32 | 0.545528 | 0.632 | 0.395 | 8.84E-28 | LPC-1 |
| AKR1C1         | 4.93E-32 | 0.396529 | 0.512 | 0.222 | 8.97E-28 | LPC-1 |
| CMTM7          | 8.87E-32 | 0.33724  | 0.318 | 0.106 | 1.62E-27 | LPC-1 |
| NRN1           | 1.53E-31 | 0.475041 | 0.291 | 0.093 | 2.79E-27 | LPC-1 |
| LAMB3          | 1.58E-31 | 0.493129 | 0.531 | 0.264 | 2.88E-27 | LPC-1 |

|                |          |          |       |       |          |       |
|----------------|----------|----------|-------|-------|----------|-------|
| RPL37A         | 3.73E-31 | 0.277839 | 1     | 0.998 | 6.78E-27 | LPC-1 |
| RPL38          | 5.80E-31 | 0.300641 | 0.992 | 0.989 | 1.06E-26 | LPC-1 |
| NUCB2          | 6.11E-31 | 0.507093 | 0.601 | 0.333 | 1.11E-26 | LPC-1 |
| MSS51          | 2.20E-30 | 0.354256 | 0.992 | 0.979 | 4.00E-26 | LPC-1 |
| ATRAID         | 6.30E-30 | 0.456569 | 0.876 | 0.802 | 1.15E-25 | LPC-1 |
| CDH13          | 7.73E-30 | 0.372093 | 0.368 | 0.14  | 1.41E-25 | LPC-1 |
| HEXA           | 3.12E-29 | 0.529544 | 0.519 | 0.289 | 5.68E-25 | LPC-1 |
| ENSG0000019872 | 7.91E-29 | 0.392936 | 1     | 0.993 | 1.44E-24 | LPC-1 |
| SLC22A17       | 1.68E-28 | 0.439563 | 0.477 | 0.239 | 3.07E-24 | LPC-1 |
| EIF4A2         | 2.25E-28 | 0.407124 | 0.926 | 0.902 | 4.10E-24 | LPC-1 |
| CSAD           | 3.69E-28 | 0.507496 | 0.422 | 0.199 | 6.72E-24 | LPC-1 |
| RGS2           | 4.41E-28 | 0.457695 | 0.519 | 0.275 | 8.03E-24 | LPC-1 |
| SYNE2          | 4.60E-28 | 0.520136 | 0.605 | 0.386 | 8.38E-24 | LPC-1 |
| P4HB           | 5.67E-28 | 0.531809 | 0.748 | 0.617 | 1.03E-23 | LPC-1 |
| PPP1R15A       | 7.23E-28 | 0.430067 | 0.969 | 0.916 | 1.32E-23 | LPC-1 |
| ATP1A1         | 1.37E-27 | 0.494201 | 0.756 | 0.587 | 2.50E-23 | LPC-1 |
| NFIB           | 2.04E-27 | 0.471567 | 0.38  | 0.163 | 3.72E-23 | LPC-1 |
| AKR1C3         | 2.21E-27 | 0.336471 | 0.318 | 0.114 | 4.02E-23 | LPC-1 |
| NME4           | 2.95E-27 | 0.373004 | 0.391 | 0.171 | 5.37E-23 | LPC-1 |
| HMG3           | 1.07E-26 | 0.362921 | 0.988 | 0.93  | 1.94E-22 | LPC-1 |
| PABPC1         | 1.30E-26 | 0.423396 | 0.934 | 0.902 | 2.37E-22 | LPC-1 |
| PDLIM1         | 1.55E-25 | 0.384824 | 0.903 | 0.77  | 2.82E-21 | LPC-1 |
| CXCL2          | 2.80E-25 | 0.519314 | 0.492 | 0.231 | 5.10E-21 | LPC-1 |
| ZFP36          | 3.20E-25 | 0.454145 | 0.988 | 0.976 | 5.83E-21 | LPC-1 |
| DUSP1          | 5.07E-25 | 0.458767 | 0.996 | 0.988 | 9.23E-21 | LPC-1 |
| FBL            | 5.85E-25 | 0.495302 | 0.678 | 0.549 | 1.07E-20 | LPC-1 |
| ESD            | 8.15E-25 | 0.419556 | 0.702 | 0.532 | 1.48E-20 | LPC-1 |
| RPS14P3        | 1.60E-24 | 0.328518 | 0.969 | 0.962 | 2.91E-20 | LPC-1 |
| TXNIP          | 2.34E-24 | 0.490078 | 0.845 | 0.674 | 4.25E-20 | LPC-1 |
| MATN2          | 3.13E-24 | 0.44667  | 0.5   | 0.282 | 5.70E-20 | LPC-1 |
| ETFB           | 3.51E-24 | 0.459887 | 0.775 | 0.699 | 6.38E-20 | LPC-1 |
| OAT            | 4.62E-24 | 0.394618 | 0.601 | 0.379 | 8.41E-20 | LPC-1 |
| CYP27A1        | 9.07E-24 | 0.264159 | 0.252 | 0.085 | 1.65E-19 | LPC-1 |
| GOLGA8B        | 2.03E-23 | 0.335698 | 0.291 | 0.112 | 3.70E-19 | LPC-1 |
| TUBA1A         | 2.05E-23 | 0.610794 | 0.798 | 0.708 | 3.73E-19 | LPC-1 |
| DST            | 6.67E-23 | 0.419969 | 0.605 | 0.361 | 1.21E-18 | LPC-1 |
| CFI            | 8.08E-22 | 0.475462 | 0.442 | 0.252 | 1.47E-17 | LPC-1 |
| B2M            | 1.06E-21 | 0.265579 | 1     | 0.997 | 1.93E-17 | LPC-1 |
| CADM1          | 1.94E-21 | 0.444242 | 0.388 | 0.195 | 3.53E-17 | LPC-1 |
| TFAP2A         | 2.20E-21 | 0.465381 | 0.57  | 0.384 | 4.00E-17 | LPC-1 |
| LMNA           | 2.30E-21 | 0.417385 | 0.984 | 0.967 | 4.19E-17 | LPC-1 |
| EPAS1          | 3.70E-21 | 0.396927 | 0.512 | 0.304 | 6.74E-17 | LPC-1 |
| HOPX           | 4.51E-21 | 0.276596 | 0.81  | 0.558 | 8.22E-17 | LPC-1 |
| RNASE4         | 5.11E-21 | 0.267407 | 0.547 | 0.29  | 9.31E-17 | LPC-1 |
| L32131         | 5.47E-21 | 0.346639 | 0.849 | 0.744 | 9.96E-17 | LPC-1 |
| CD44           | 2.35E-20 | 0.350307 | 0.717 | 0.582 | 4.29E-16 | LPC-1 |
| COL17A1        | 2.86E-20 | 0.314267 | 0.76  | 0.484 | 5.21E-16 | LPC-1 |
| HSPA2          | 5.13E-20 | 0.417432 | 0.605 | 0.405 | 9.35E-16 | LPC-1 |

|                |          |          |       |       |          |       |
|----------------|----------|----------|-------|-------|----------|-------|
| FMO1           | 5.09E-19 | 0.297157 | 0.384 | 0.177 | 9.26E-15 | LPC-1 |
| CYP2S1         | 7.64E-19 | 0.277727 | 0.264 | 0.105 | 1.39E-14 | LPC-1 |
| TRA2B          | 1.86E-18 | 0.381252 | 0.837 | 0.794 | 3.39E-14 | LPC-1 |
| SLC2A1         | 2.22E-18 | 0.460079 | 0.93  | 0.859 | 4.04E-14 | LPC-1 |
| ENSG0000019888 | 3.17E-18 | 0.252795 | 1     | 0.998 | 5.78E-14 | LPC-1 |
| LSR            | 3.35E-18 | 0.445614 | 0.593 | 0.444 | 6.10E-14 | LPC-1 |
| LRPAP1         | 5.21E-18 | 0.382994 | 0.748 | 0.685 | 9.49E-14 | LPC-1 |
| ENSG0000019889 | 2.90E-17 | 0.254234 | 1     | 0.987 | 5.28E-13 | LPC-1 |
| BEX2           | 4.94E-17 | 0.345325 | 0.516 | 0.337 | 9.00E-13 | LPC-1 |
| CCNI           | 1.06E-16 | 0.371336 | 0.678 | 0.539 | 1.93E-12 | LPC-1 |
| PEBP1          | 1.61E-16 | 0.283645 | 0.977 | 0.972 | 2.93E-12 | LPC-1 |
| PAX6           | 1.62E-16 | 0.319183 | 0.973 | 0.799 | 2.95E-12 | LPC-1 |
| TPD52L1        | 3.12E-16 | 0.328787 | 0.709 | 0.552 | 5.67E-12 | LPC-1 |
| VKORC1         | 3.13E-16 | 0.415558 | 0.554 | 0.409 | 5.71E-12 | LPC-1 |
| GRN            | 4.64E-16 | 0.371986 | 0.806 | 0.765 | 8.45E-12 | LPC-1 |
| ANP32B         | 5.76E-16 | 0.36291  | 0.756 | 0.737 | 1.05E-11 | LPC-1 |
| MAGED1         | 1.09E-15 | 0.320132 | 0.372 | 0.21  | 1.98E-11 | LPC-1 |
| GPX2           | 1.44E-15 | 0.39879  | 0.558 | 0.385 | 2.63E-11 | LPC-1 |
| EFEMP1         | 1.84E-15 | 0.450715 | 0.484 | 0.312 | 3.36E-11 | LPC-1 |
| ZNF503         | 3.00E-15 | 0.294716 | 0.372 | 0.203 | 5.47E-11 | LPC-1 |
| ARL4A          | 3.34E-15 | 0.374419 | 0.74  | 0.615 | 6.08E-11 | LPC-1 |
| SPINT2         | 4.31E-15 | 0.27394  | 0.988 | 0.835 | 7.84E-11 | LPC-1 |
| FKBP8          | 4.84E-15 | 0.36355  | 0.725 | 0.668 | 8.81E-11 | LPC-1 |
| FBLN1          | 7.93E-15 | 0.317413 | 0.453 | 0.293 | 1.44E-10 | LPC-1 |
| HSPA1B         | 2.10E-14 | 0.366884 | 0.783 | 0.711 | 3.82E-10 | LPC-1 |
| RAB4A          | 2.72E-14 | 0.311788 | 0.802 | 0.737 | 4.95E-10 | LPC-1 |
| EIF3H          | 2.73E-14 | 0.300285 | 0.895 | 0.846 | 4.97E-10 | LPC-1 |
| BCAM           | 4.57E-14 | 0.256871 | 0.535 | 0.328 | 8.33E-10 | LPC-1 |
| DUSP6          | 6.30E-14 | 0.338083 | 0.364 | 0.207 | 1.15E-09 | LPC-1 |
| SEPT9          | 7.55E-14 | 0.250203 | 0.318 | 0.168 | 1.37E-09 | LPC-1 |
| BOC            | 8.10E-14 | 0.363577 | 0.337 | 0.186 | 1.47E-09 | LPC-1 |
| ERGIC3         | 9.11E-14 | 0.337457 | 0.717 | 0.659 | 1.66E-09 | LPC-1 |
| PHGDH          | 1.14E-13 | 0.363984 | 0.523 | 0.385 | 2.08E-09 | LPC-1 |
| TMEM173        | 1.33E-13 | 0.276486 | 0.267 | 0.129 | 2.43E-09 | LPC-1 |
| DANCR          | 1.50E-13 | 0.322923 | 0.729 | 0.654 | 2.74E-09 | LPC-1 |
| GNAL           | 1.54E-13 | 0.272181 | 0.283 | 0.143 | 2.80E-09 | LPC-1 |
| FOXP1          | 2.50E-13 | 0.256323 | 0.965 | 0.945 | 4.54E-09 | LPC-1 |
| NPM3           | 3.16E-13 | 0.292522 | 0.341 | 0.196 | 5.76E-09 | LPC-1 |
| PRKCSH         | 6.26E-13 | 0.313125 | 0.407 | 0.267 | 1.14E-08 | LPC-1 |
| IER2           | 6.53E-13 | 0.260581 | 0.996 | 0.996 | 1.19E-08 | LPC-1 |
| SAT2           | 2.66E-12 | 0.30359  | 0.566 | 0.45  | 4.84E-08 | LPC-1 |
| LAMP1          | 3.52E-12 | 0.279821 | 0.841 | 0.814 | 6.40E-08 | LPC-1 |
| NUCKS1         | 4.75E-12 | 0.288553 | 0.802 | 0.774 | 8.64E-08 | LPC-1 |
| SF1            | 7.70E-12 | 0.286666 | 0.492 | 0.359 | 1.40E-07 | LPC-1 |
| EMC10          | 8.09E-12 | 0.298556 | 0.496 | 0.378 | 1.47E-07 | LPC-1 |
| ID3            | 9.66E-12 | 0.356325 | 0.818 | 0.759 | 1.76E-07 | LPC-1 |
| IER3           | 1.30E-11 | 0.326344 | 0.884 | 0.831 | 2.37E-07 | LPC-1 |
| BEND5          | 1.39E-11 | 0.315846 | 0.341 | 0.208 | 2.53E-07 | LPC-1 |

|                |          |          |       |       |          |       |
|----------------|----------|----------|-------|-------|----------|-------|
| TMED10         | 2.49E-11 | 0.301184 | 0.826 | 0.816 | 4.53E-07 | LPC-1 |
| CYB5R3         | 3.69E-11 | 0.295303 | 0.531 | 0.422 | 6.72E-07 | LPC-1 |
| LOC100129195   | 5.19E-11 | 0.261864 | 0.264 | 0.139 | 9.45E-07 | LPC-1 |
| CHID1          | 5.37E-11 | 0.324104 | 0.419 | 0.301 | 9.77E-07 | LPC-1 |
| PHF1           | 5.83E-11 | 0.293861 | 0.399 | 0.272 | 1.06E-06 | LPC-1 |
| LAMP2          | 6.78E-11 | 0.29555  | 0.713 | 0.672 | 1.23E-06 | LPC-1 |
| IFRD1          | 7.27E-11 | 0.327451 | 0.519 | 0.41  | 1.32E-06 | LPC-1 |
| SLC3A2         | 8.02E-11 | 0.256064 | 0.814 | 0.788 | 1.46E-06 | LPC-1 |
| ENSG0000019884 | 8.32E-11 | 0.28134  | 0.938 | 0.883 | 1.52E-06 | LPC-1 |
| RSL1D1         | 8.41E-11 | 0.286822 | 0.717 | 0.688 | 1.53E-06 | LPC-1 |
| PCBP2          | 9.17E-11 | 0.264054 | 0.841 | 0.816 | 1.67E-06 | LPC-1 |
| KRTCAP3        | 1.74E-10 | 0.27165  | 0.411 | 0.286 | 3.16E-06 | LPC-1 |
| SOCS3          | 2.11E-10 | 0.34109  | 0.469 | 0.331 | 3.84E-06 | LPC-1 |
| PPT1           | 2.27E-10 | 0.276237 | 0.667 | 0.581 | 4.13E-06 | LPC-1 |
| FSCN1          | 3.44E-10 | 0.289651 | 0.376 | 0.245 | 6.27E-06 | LPC-1 |
| ATF3           | 3.64E-10 | 0.261586 | 0.779 | 0.699 | 6.63E-06 | LPC-1 |
| DPP7           | 8.10E-10 | 0.258532 | 0.578 | 0.474 | 1.47E-05 | LPC-1 |
| CRNDE          | 1.15E-09 | 0.259859 | 0.492 | 0.353 | 2.10E-05 | LPC-1 |
| PNISR          | 1.25E-09 | 0.270952 | 0.698 | 0.66  | 2.27E-05 | LPC-1 |
| GUSB           | 1.45E-09 | 0.28772  | 0.403 | 0.288 | 2.64E-05 | LPC-1 |
| KMT2E          | 3.92E-09 | 0.252682 | 0.643 | 0.587 | 7.14E-05 | LPC-1 |
| DNAJC4         | 5.13E-09 | 0.283103 | 0.407 | 0.305 | 9.34E-05 | LPC-1 |
| CLSTN1         | 5.90E-09 | 0.321912 | 0.496 | 0.4   | 0.000107 | LPC-1 |
| GPNMB          | 1.04E-08 | 0.347138 | 0.674 | 0.55  | 0.000189 | LPC-1 |
| GAA            | 1.53E-08 | 0.263991 | 0.267 | 0.16  | 0.000278 | LPC-1 |
| SNHG7          | 1.79E-08 | 0.252707 | 0.655 | 0.599 | 0.000326 | LPC-1 |
| SH3BGRL        | 2.92E-08 | 0.267812 | 0.647 | 0.637 | 0.000532 | LPC-1 |
| FAM60A         | 5.23E-08 | 0.288282 | 0.45  | 0.359 | 0.000952 | LPC-1 |
| PDIA6          | 5.81E-08 | 0.25247  | 0.76  | 0.767 | 0.001059 | LPC-1 |
| EMX2           | 1.46E-07 | 0.291965 | 0.38  | 0.27  | 0.002664 | LPC-1 |
| MRPS6          | 1.53E-07 | 0.269378 | 0.62  | 0.588 | 0.002793 | LPC-1 |
| PLK2           | 2.42E-07 | 0.257836 | 0.616 | 0.53  | 0.0044   | LPC-1 |
| PHIP           | 4.02E-07 | 0.275445 | 0.372 | 0.279 | 0.007324 | LPC-1 |
| PRRC2C         | 4.04E-07 | 0.2795   | 0.562 | 0.519 | 0.007351 | LPC-1 |
| ARL2           | 1.03E-06 | 0.254831 | 0.512 | 0.463 | 0.01882  | LPC-1 |
| TGFBI          | 1.68E-06 | 0.280533 | 0.996 | 0.901 | 0.030616 | LPC-1 |
| NFKBIA         | 4.92E-06 | 0.260906 | 0.884 | 0.944 | 0.089672 | LPC-1 |
| CO9            | 2.13E-05 | 0.255476 | 0.43  | 0.363 | 0.388612 | LPC-1 |
| TOB1           | 0.003894 | 0.260746 | 0.663 | 0.687 | 1        | LPC-1 |
| HLA-DPA1       | 0        | 4.133391 | 1     | 0.09  | 0        | LC    |
| HLA-DPB1       | 0        | 4.092833 | 0.992 | 0.077 | 0        | LC    |
| RGS1           | 0        | 3.928151 | 0.977 | 0.005 | 0        | LC    |
| CCL3           | 0        | 3.569543 | 0.869 | 0.004 | 0        | LC    |
| LAPTM5         | 0        | 3.079728 | 0.977 | 0.015 | 0        | LC    |
| TYROBP         | 0        | 3.055224 | 1     | 0.004 | 0        | LC    |
| SRGN           | 0        | 2.98859  | 0.931 | 0.029 | 0        | LC    |
| HLA-DQA1       | 0        | 2.712115 | 0.931 | 0.007 | 0        | LC    |
| GPR183         | 0        | 2.554712 | 0.831 | 0.002 | 0        | LC    |

|          |   |          |       |       |      |
|----------|---|----------|-------|-------|------|
| FCER1G   | 0 | 2.325049 | 0.938 | 0.005 | 0 LC |
| AIF1     | 0 | 2.267234 | 0.823 | 0.002 | 0 LC |
| CCL4     | 0 | 2.218806 | 0.515 | 0.001 | 0 LC |
| CXCR4    | 0 | 2.208692 | 0.808 | 0.004 | 0 LC |
| IL1B     | 0 | 2.183816 | 0.523 | 0.01  | 0 LC |
| C1QA     | 0 | 2.17435  | 0.631 | 0.002 | 0 LC |
| HLA-DRB6 | 0 | 2.15595  | 0.723 | 0.031 | 0 LC |
| FCER1A   | 0 | 2.118797 | 0.654 | 0.003 | 0 LC |
| ALOX5AP  | 0 | 2.084345 | 0.815 | 0.001 | 0 LC |
| C1QC     | 0 | 1.920988 | 0.523 | 0.001 | 0 LC |
| LST1     | 0 | 1.903189 | 0.854 | 0.002 | 0 LC |
| CCL4L2   | 0 | 1.850983 | 0.392 | 0     | 0 LC |
| HLA-DMB  | 0 | 1.81013  | 0.785 | 0.019 | 0 LC |
| C1QB     | 0 | 1.744548 | 0.469 | 0.001 | 0 LC |
| MS4A6A   | 0 | 1.725233 | 0.738 | 0.001 | 0 LC |
| FCGR2A   | 0 | 1.670301 | 0.738 | 0.001 | 0 LC |
| PLEK     | 0 | 1.591219 | 0.638 | 0     | 0 LC |
| BCL2A1   | 0 | 1.46927  | 0.531 | 0.008 | 0 LC |
| FAM26F   | 0 | 1.46918  | 0.662 | 0.014 | 0 LC |
| C1orf162 | 0 | 1.442825 | 0.623 | 0.005 | 0 LC |
| HCST     | 0 | 1.429567 | 0.685 | 0.018 | 0 LC |
| ITGB2    | 0 | 1.402435 | 0.638 | 0.003 | 0 LC |
| E02193   | 0 | 1.382744 | 0.469 | 0.001 | 0 LC |
| RNASE6   | 0 | 1.280836 | 0.608 | 0.001 | 0 LC |
| MS4A7    | 0 | 1.267077 | 0.562 | 0.001 | 0 LC |
| SPI1     | 0 | 1.250395 | 0.538 | 0.003 | 0 LC |
| LY86     | 0 | 1.249993 | 0.615 | 0.001 | 0 LC |
| FCGR3A   | 0 | 1.238989 | 0.508 | 0     | 0 LC |
| FCGR2B   | 0 | 1.228467 | 0.508 | 0.001 | 0 LC |
| CD37     | 0 | 1.213313 | 0.592 | 0.005 | 0 LC |
| CYTIP    | 0 | 1.197614 | 0.454 | 0.001 | 0 LC |
| CLEC10A  | 0 | 1.181552 | 0.4   | 0     | 0 LC |
| CD86     | 0 | 1.168324 | 0.554 | 0.002 | 0 LC |
| MEF2C    | 0 | 1.139164 | 0.515 | 0.005 | 0 LC |
| OLR1     | 0 | 1.116283 | 0.385 | 0     | 0 LC |
| EVI2B    | 0 | 1.110733 | 0.538 | 0.001 | 0 LC |
| HCLS1    | 0 | 1.108072 | 0.477 | 0.001 | 0 LC |
| CD53     | 0 | 1.10221  | 0.508 | 0.001 | 0 LC |
| CLEC5A   | 0 | 1.064998 | 0.415 | 0     | 0 LC |
| MNDA     | 0 | 1.060348 | 0.454 | 0.001 | 0 LC |
| GLIPR1   | 0 | 1.059271 | 0.446 | 0.004 | 0 LC |
| TREM2    | 0 | 1.045185 | 0.385 | 0     | 0 LC |
| CD69     | 0 | 1.034915 | 0.362 | 0.003 | 0 LC |
| VSIG4    | 0 | 1.007226 | 0.423 | 0     | 0 LC |
| GMFG     | 0 | 0.98607  | 0.477 | 0.004 | 0 LC |
| P2RY13   | 0 | 0.984398 | 0.362 | 0     | 0 LC |
| NAPSB    | 0 | 0.957797 | 0.423 | 0.002 | 0 LC |
| TAGAP    | 0 | 0.943392 | 0.415 | 0.005 | 0 LC |



|          |           |          |       |       |           |    |
|----------|-----------|----------|-------|-------|-----------|----|
| PTPRC    | 0         | 0.939523 | 0.408 | 0     | 0         | LC |
| CD163    | 0         | 0.931694 | 0.323 | 0.001 | 0         | LC |
| EVI2A    | 0         | 0.910294 | 0.385 | 0.004 | 0         | LC |
| HLA-DQB2 | 0         | 0.906998 | 0.315 | 0.001 | 0         | LC |
| DOK2     | 0         | 0.886508 | 0.323 | 0     | 0         | LC |
| CORO1A   | 0         | 0.885476 | 0.408 | 0.004 | 0         | LC |
| GGTA1P   | 0         | 0.883661 | 0.408 | 0.006 | 0         | LC |
| HLA-DQA2 | 0         | 0.873504 | 0.346 | 0     | 0         | LC |
| LCP1     | 0         | 0.854059 | 0.362 | 0.004 | 0         | LC |
| CXorf21  | 0         | 0.83429  | 0.338 | 0.001 | 0         | LC |
| MSR1     | 0         | 0.830585 | 0.315 | 0     | 0         | LC |
| BST2     | 0         | 0.80806  | 0.423 | 0.011 | 0         | LC |
| AMICA1   | 0         | 0.807765 | 0.338 | 0.001 | 0         | LC |
| HHEX     | 0         | 0.790284 | 0.331 | 0.004 | 0         | LC |
| CD300A   | 0         | 0.771697 | 0.369 | 0.001 | 0         | LC |
| LAT2     | 0         | 0.760834 | 0.354 | 0.003 | 0         | LC |
| CSF1R    | 0         | 0.749202 | 0.346 | 0     | 0         | LC |
| PLD4     | 0         | 0.72825  | 0.292 | 0     | 0         | LC |
| HAVCR2   | 0         | 0.717219 | 0.338 | 0.001 | 0         | LC |
| IGSF6    | 0         | 0.710682 | 0.3   | 0.001 | 0         | LC |
| TBXAS1   | 0         | 0.69746  | 0.331 | 0.001 | 0         | LC |
| HOTAIRM1 | 0         | 0.657432 | 0.269 | 0     | 0         | LC |
| IRF8     | 0         | 0.656636 | 0.285 | 0     | 0         | LC |
| FPR1     | 0         | 0.644836 | 0.331 | 0.004 | 0         | LC |
| CSF2RA   | 0         | 0.617728 | 0.292 | 0.004 | 0         | LC |
| TREM1    | 0         | 0.606118 | 0.269 | 0.002 | 0         | LC |
| FGL2     | 0         | 0.603271 | 0.292 | 0.001 | 0         | LC |
| RAC2     | 0         | 0.602074 | 0.277 | 0.002 | 0         | LC |
| WAS      | 5.43E-308 | 0.526896 | 0.262 | 0.004 | 9.89E-304 | LC |
| HSPA6    | 8.09E-288 | 2.906588 | 0.569 | 0.027 | 1.47E-283 | LC |
| HLA-DMA  | 9.08E-263 | 2.249489 | 0.954 | 0.101 | 1.65E-258 | LC |
| HSPA7    | 1.01E-246 | 1.52303  | 0.308 | 0.008 | 1.85E-242 | LC |
| CD83     | 2.03E-239 | 2.398131 | 0.815 | 0.076 | 3.70E-235 | LC |
| HLA-DQB1 | 7.55E-237 | 3.072491 | 0.992 | 0.127 | 1.38E-232 | LC |
| COTL1    | 2.90E-193 | 1.906138 | 0.854 | 0.109 | 5.27E-189 | LC |
| HLA-DRB1 | 1.18E-185 | 3.795778 | 1     | 0.178 | 2.15E-181 | LC |
| IL8      | 1.66E-181 | 3.489674 | 0.831 | 0.102 | 3.02E-177 | LC |
| CD68     | 4.06E-173 | 1.455681 | 0.723 | 0.081 | 7.39E-169 | LC |
| PTGER4   | 2.38E-169 | 1.3294   | 0.485 | 0.034 | 4.34E-165 | LC |
| HLA-DRA  | 2.56E-167 | 4.113041 | 1     | 0.205 | 4.66E-163 | LC |
| NCF4     | 2.01E-162 | 0.682461 | 0.315 | 0.014 | 3.65E-158 | LC |
| ARRB2    | 5.56E-146 | 1.175151 | 0.646 | 0.076 | 1.01E-141 | LC |
| ADAM28   | 1.17E-133 | 0.615763 | 0.308 | 0.017 | 2.13E-129 | LC |
| GOS2     | 2.36E-129 | 2.86415  | 0.6   | 0.072 | 4.30E-125 | LC |
| PHACTR1  | 1.46E-126 | 0.948841 | 0.362 | 0.025 | 2.65E-122 | LC |
| TNF      | 1.78E-125 | 1.448093 | 0.554 | 0.062 | 3.24E-121 | LC |
| RGCC     | 1.33E-122 | 1.595746 | 0.731 | 0.112 | 2.42E-118 | LC |
| SERPINA1 | 6.18E-121 | 0.930893 | 0.423 | 0.036 | 1.13E-116 | LC |

|           |           |          |       |       |           |    |
|-----------|-----------|----------|-------|-------|-----------|----|
| SERPINB9  | 3.51E-112 | 0.760681 | 0.262 | 0.014 | 6.39E-108 | LC |
| RGS2      | 3.94E-108 | 2.870791 | 0.923 | 0.274 | 7.17E-104 | LC |
| C3        | 1.34E-107 | 0.624003 | 0.262 | 0.015 | 2.44E-103 | LC |
| GPSM3     | 1.39E-107 | 0.775095 | 0.392 | 0.035 | 2.52E-103 | LC |
| CD74      | 3.65E-103 | 3.984999 | 0.992 | 0.422 | 6.65E-99  | LC |
| IL1R2     | 3.81E-99  | 0.887083 | 0.277 | 0.018 | 6.93E-95  | LC |
| RGS10     | 6.39E-95  | 1.428585 | 0.692 | 0.141 | 1.16E-90  | LC |
| CXCL16    | 1.38E-90  | 1.560129 | 0.8   | 0.215 | 2.51E-86  | LC |
| DUSP2     | 1.26E-85  | 1.777955 | 0.738 | 0.175 | 2.29E-81  | LC |
| SH3KBP1   | 2.24E-85  | 0.626425 | 0.323 | 0.029 | 4.08E-81  | LC |
| HLA-DRB5  | 2.73E-85  | 2.264308 | 0.538 | 0.087 | 4.98E-81  | LC |
| LINC00936 | 2.65E-81  | 1.431162 | 0.677 | 0.156 | 4.83E-77  | LC |
| RNASET2   | 1.16E-79  | 1.8308   | 0.923 | 0.434 | 2.10E-75  | LC |
| CD14      | 6.17E-78  | 1.516364 | 0.608 | 0.124 | 1.12E-73  | LC |
| FTL       | 1.33E-77  | 1.606744 | 1     | 0.996 | 2.41E-73  | LC |
| OGFRL1    | 8.42E-76  | 0.896915 | 0.469 | 0.072 | 1.53E-71  | LC |
| ID2       | 1.90E-72  | 2.024171 | 0.977 | 0.556 | 3.45E-68  | LC |
| SPP1      | 1.44E-71  | 2.406655 | 0.346 | 0.039 | 2.63E-67  | LC |
| SEPT6     | 3.66E-62  | 0.525728 | 0.277 | 0.029 | 6.67E-58  | LC |
| KLF6      | 3.47E-61  | 1.740367 | 0.938 | 0.675 | 6.32E-57  | LC |
| PTPRE     | 5.41E-60  | 0.90537  | 0.4   | 0.064 | 9.84E-56  | LC |
| MALAT1    | 1.02E-59  | 0.85361  | 1     | 0.998 | 1.85E-55  | LC |
| NR4A2     | 3.73E-57  | 1.501379 | 0.654 | 0.197 | 6.79E-53  | LC |
| HSD17B11  | 4.26E-57  | 1.060925 | 0.515 | 0.113 | 7.76E-53  | LC |
| VMO1      | 1.48E-55  | 1.216828 | 0.446 | 0.083 | 2.70E-51  | LC |
| CTSS      | 1.68E-54  | 1.022818 | 0.692 | 0.233 | 3.06E-50  | LC |
| VIM       | 2.61E-54  | 0.698095 | 0.985 | 0.326 | 4.75E-50  | LC |
| RPS27     | 1.68E-53  | 0.675002 | 1     | 1     | 3.05E-49  | LC |
| NFKBIA    | 5.74E-52  | 1.481944 | 0.977 | 0.942 | 1.05E-47  | LC |
| LGALS1    | 9.00E-51  | 1.019847 | 0.908 | 0.324 | 1.64E-46  | LC |
| EMP3      | 1.04E-50  | 1.091544 | 0.785 | 0.276 | 1.90E-46  | LC |
| IFIT2     | 1.22E-50  | 0.674811 | 0.308 | 0.044 | 2.23E-46  | LC |
| FYB       | 2.27E-49  | 0.728652 | 0.369 | 0.064 | 4.14E-45  | LC |
| CYBA      | 5.36E-48  | 1.361904 | 0.854 | 0.552 | 9.75E-44  | LC |
| RPS27A    | 1.01E-47  | 0.688229 | 1     | 0.997 | 1.83E-43  | LC |
| GPX1      | 1.48E-47  | 1.024465 | 0.985 | 0.946 | 2.69E-43  | LC |
| RPLP2     | 4.11E-47  | 0.615682 | 1     | 0.999 | 7.49E-43  | LC |
| RNF130    | 8.86E-47  | 1.027677 | 0.546 | 0.157 | 1.61E-42  | LC |
| RPS19     | 5.95E-45  | 0.716014 | 1     | 0.998 | 1.08E-40  | LC |
| TMSB10    | 7.96E-43  | 0.765809 | 1     | 0.997 | 1.45E-38  | LC |
| SGK1      | 6.50E-42  | 1.645178 | 0.892 | 0.709 | 1.18E-37  | LC |
| NPC2      | 1.15E-41  | 1.074848 | 0.931 | 0.869 | 2.10E-37  | LC |
| C15orf48  | 1.24E-40  | 1.08327  | 0.369 | 0.074 | 2.26E-36  | LC |
| TPT1      | 2.03E-40  | 0.727199 | 0.985 | 0.997 | 3.69E-36  | LC |
| RPL36A    | 2.79E-40  | 0.716689 | 1     | 0.989 | 5.09E-36  | LC |
| ALOX5     | 3.15E-40  | 0.532897 | 0.269 | 0.041 | 5.73E-36  | LC |
| LY96      | 5.82E-40  | 0.530321 | 0.3   | 0.051 | 1.06E-35  | LC |
| TNFSF13B  | 6.13E-40  | 0.555127 | 0.292 | 0.049 | 1.12E-35  | LC |

|            |          |          |       |       |          |    |
|------------|----------|----------|-------|-------|----------|----|
| RPL26      | 1.28E-39 | 0.540772 | 1     | 0.999 | 2.33E-35 | LC |
| FXYD5      | 2.83E-39 | 0.93249  | 0.523 | 0.154 | 5.15E-35 | LC |
| MAFB       | 1.11E-38 | 1.311692 | 0.877 | 0.611 | 2.02E-34 | LC |
| RPS16      | 1.83E-38 | 0.623928 | 0.992 | 0.994 | 3.33E-34 | LC |
| RPS29      | 5.25E-37 | 0.596799 | 1     | 0.996 | 9.55E-33 | LC |
| RPL39      | 1.40E-36 | 0.463561 | 1     | 0.999 | 2.55E-32 | LC |
| PLIN2      | 3.60E-36 | 1.106004 | 0.485 | 0.146 | 6.55E-32 | LC |
| RPS23      | 3.35E-35 | 0.532319 | 1     | 0.998 | 6.11E-31 | LC |
| HIF1A      | 9.36E-35 | 1.217288 | 0.485 | 0.158 | 1.70E-30 | LC |
| CXCL3      | 6.25E-34 | 2.4675   | 0.362 | 0.085 | 1.14E-29 | LC |
| KCTD12     | 6.28E-34 | 0.71979  | 0.354 | 0.08  | 1.14E-29 | LC |
| RPL10      | 6.91E-34 | 0.464771 | 1     | 1     | 1.26E-29 | LC |
| MSN        | 7.72E-34 | 0.735081 | 0.392 | 0.101 | 1.41E-29 | LC |
| HIST2H2AA4 | 8.89E-34 | 1.207114 | 0.931 | 0.717 | 1.62E-29 | LC |
| PABPC1     | 2.83E-33 | 0.858079 | 0.962 | 0.902 | 5.15E-29 | LC |
| SOD2       | 6.51E-33 | 1.593751 | 0.654 | 0.319 | 1.19E-28 | LC |
| RPL21      | 2.17E-32 | 0.477598 | 1     | 0.999 | 3.95E-28 | LC |
| GADD45B    | 2.36E-32 | 0.967576 | 0.962 | 0.928 | 4.29E-28 | LC |
| RPL18A     | 2.58E-32 | 0.471372 | 1     | 0.997 | 4.70E-28 | LC |
| RPS2       | 3.58E-32 | 0.478491 | 1     | 0.997 | 6.52E-28 | LC |
| CXCL2      | 3.74E-31 | 2.035002 | 0.592 | 0.232 | 6.82E-27 | LC |
| EEF1A1     | 8.79E-31 | 0.504756 | 1     | 1     | 1.60E-26 | LC |
| FCGRT      | 1.30E-30 | 1.069121 | 0.623 | 0.308 | 2.37E-26 | LC |
| GADD45G    | 1.63E-30 | 1.369046 | 0.715 | 0.409 | 2.97E-26 | LC |
| SLC2A3     | 3.29E-30 | 0.768834 | 0.392 | 0.105 | 5.98E-26 | LC |
| IL13RA1    | 8.15E-30 | 0.868818 | 0.408 | 0.121 | 1.48E-25 | LC |
| RPL38      | 1.23E-29 | 0.554167 | 1     | 0.989 | 2.23E-25 | LC |
| RPS3A      | 3.20E-29 | 0.461285 | 1     | 0.998 | 5.83E-25 | LC |
| EEF1B2     | 3.50E-29 | 0.754937 | 0.923 | 0.903 | 6.38E-25 | LC |
| TRA2B      | 6.90E-29 | 1.019411 | 0.838 | 0.794 | 1.26E-24 | LC |
| RPL37      | 8.18E-29 | 0.525183 | 1     | 0.995 | 1.49E-24 | LC |
| PLAUR      | 8.64E-29 | 0.986176 | 0.654 | 0.287 | 1.57E-24 | LC |
| CITED2     | 1.65E-28 | 1.034049 | 0.831 | 0.648 | 3.01E-24 | LC |
| RPS15A     | 3.16E-28 | 0.462252 | 1     | 0.997 | 5.75E-24 | LC |
| CLEC7A     | 3.43E-28 | 0.953219 | 0.638 | 0.344 | 6.25E-24 | LC |
| ERV3-1     | 7.46E-28 | 0.831618 | 0.338 | 0.089 | 1.36E-23 | LC |
| RPL13      | 7.49E-28 | 0.430206 | 1     | 0.999 | 1.36E-23 | LC |
| RPL17      | 7.96E-28 | 0.529911 | 0.992 | 0.985 | 1.45E-23 | LC |
| RPL32      | 9.96E-28 | 0.417309 | 1     | 0.999 | 1.81E-23 | LC |
| UBA52      | 1.32E-27 | 0.511866 | 0.992 | 0.988 | 2.41E-23 | LC |
| C1orf54    | 1.84E-27 | 0.653301 | 0.262 | 0.054 | 3.36E-23 | LC |
| RAB31      | 2.58E-27 | 0.549917 | 0.262 | 0.055 | 4.70E-23 | LC |
| FAU        | 2.93E-27 | 0.390613 | 1     | 0.998 | 5.34E-23 | LC |
| LOC284454  | 3.67E-27 | 0.785095 | 0.308 | 0.075 | 6.68E-23 | LC |
| EIF1       | 4.38E-27 | 0.418283 | 1     | 1     | 7.98E-23 | LC |
| RPS20      | 1.02E-26 | 0.456572 | 0.992 | 0.997 | 1.85E-22 | LC |
| RPS11      | 2.07E-26 | 0.517935 | 0.977 | 0.985 | 3.78E-22 | LC |
| AP1S2      | 2.37E-26 | 0.62712  | 0.377 | 0.112 | 4.32E-22 | LC |

|            |          |          |       |       |          |    |
|------------|----------|----------|-------|-------|----------|----|
| RPS10      | 1.01E-25 | 0.561121 | 0.977 | 0.978 | 1.84E-21 | LC |
| DDIT4      | 2.17E-25 | 1.046864 | 0.715 | 0.462 | 3.96E-21 | LC |
| AKAP13     | 2.39E-25 | 0.823316 | 0.462 | 0.178 | 4.36E-21 | LC |
| MSS51      | 4.37E-25 | 0.521035 | 0.992 | 0.979 | 7.96E-21 | LC |
| RPL23      | 9.66E-25 | 0.533841 | 1     | 0.985 | 1.76E-20 | LC |
| RPL31      | 1.07E-24 | 0.410817 | 0.992 | 0.998 | 1.95E-20 | LC |
| RASSF4     | 3.94E-23 | 0.487741 | 0.269 | 0.066 | 7.17E-19 | LC |
| HSPA1A     | 4.24E-23 | 1.270885 | 0.438 | 0.173 | 7.72E-19 | LC |
| CTSH       | 4.79E-23 | 0.8541   | 0.531 | 0.265 | 8.71E-19 | LC |
| AMZ2P1     | 5.04E-23 | 0.698786 | 0.354 | 0.113 | 9.18E-19 | LC |
| RGS19      | 6.67E-23 | 0.516455 | 0.277 | 0.07  | 1.21E-18 | LC |
| PPP1R15A   | 7.89E-23 | 0.85156  | 0.954 | 0.916 | 1.44E-18 | LC |
| CMTM6      | 8.74E-23 | 0.818017 | 0.523 | 0.256 | 1.59E-18 | LC |
| HSP90AA1   | 1.04E-22 | 0.981525 | 0.946 | 0.975 | 1.90E-18 | LC |
| RPL27      | 1.42E-22 | 0.480735 | 0.992 | 0.994 | 2.59E-18 | LC |
| RPS13      | 1.72E-22 | 0.352663 | 1     | 0.998 | 3.14E-18 | LC |
| CPVL       | 1.94E-22 | 0.789571 | 0.492 | 0.191 | 3.53E-18 | LC |
| RPS3       | 2.28E-22 | 0.409761 | 1     | 0.996 | 4.15E-18 | LC |
| PFDN5      | 4.27E-22 | 0.556623 | 0.992 | 0.974 | 7.77E-18 | LC |
| RPL34      | 5.47E-22 | 0.362687 | 1     | 1     | 9.96E-18 | LC |
| RPPH1      | 2.97E-21 | 0.894172 | 0.377 | 0.134 | 5.42E-17 | LC |
| IER3       | 5.31E-21 | 0.852809 | 0.838 | 0.832 | 9.67E-17 | LC |
| HSPA8      | 8.46E-21 | 0.914816 | 0.831 | 0.792 | 1.54E-16 | LC |
| RPL28      | 8.51E-21 | 0.436602 | 0.992 | 0.992 | 1.55E-16 | LC |
| ZFP36L2    | 9.89E-21 | 1.095912 | 0.7   | 0.521 | 1.80E-16 | LC |
| PTMA       | 1.42E-20 | 0.443227 | 1     | 0.996 | 2.58E-16 | LC |
| HSPA1B     | 1.90E-20 | 1.65956  | 0.746 | 0.712 | 3.46E-16 | LC |
| RPS6       | 1.94E-20 | 0.380939 | 1     | 0.999 | 3.53E-16 | LC |
| BTG1       | 2.09E-20 | 0.856831 | 0.938 | 0.953 | 3.81E-16 | LC |
| RPL19      | 2.46E-20 | 0.359481 | 0.992 | 0.999 | 4.49E-16 | LC |
| HERPUD1    | 2.62E-20 | 0.793326 | 0.938 | 0.942 | 4.77E-16 | LC |
| SNHG5      | 2.94E-20 | 0.662705 | 0.923 | 0.918 | 5.35E-16 | LC |
| MID1IP1    | 5.69E-20 | 1.008611 | 0.554 | 0.313 | 1.04E-15 | LC |
| HIST1H2AE  | 6.97E-20 | 0.800794 | 0.369 | 0.13  | 1.27E-15 | LC |
| OTUD1      | 8.89E-20 | 0.914163 | 0.408 | 0.166 | 1.62E-15 | LC |
| CEBPD      | 1.18E-19 | 0.985172 | 0.731 | 0.601 | 2.16E-15 | LC |
| RPL27A     | 4.04E-19 | 0.365568 | 1     | 0.998 | 7.35E-15 | LC |
| NEAT1      | 4.41E-19 | 0.585891 | 0.985 | 0.932 | 8.03E-15 | LC |
| EEF1G      | 6.33E-19 | 0.432066 | 0.985 | 0.988 | 1.15E-14 | LC |
| CTSZ       | 6.60E-19 | 0.618854 | 0.369 | 0.137 | 1.20E-14 | LC |
| RILPL2     | 9.56E-19 | 0.618743 | 0.346 | 0.124 | 1.74E-14 | LC |
| PLSCR1     | 1.28E-18 | 0.744441 | 0.446 | 0.209 | 2.33E-14 | LC |
| CHPT1      | 1.39E-18 | 0.509829 | 0.277 | 0.081 | 2.52E-14 | LC |
| PRKAG2-AS1 | 2.01E-18 | 0.592017 | 0.269 | 0.079 | 3.66E-14 | LC |
| YWHAH      | 3.15E-18 | 1.027846 | 0.692 | 0.604 | 5.74E-14 | LC |
| NFKBIZ     | 3.18E-18 | 0.928329 | 0.569 | 0.342 | 5.78E-14 | LC |
| RPL6       | 3.55E-18 | 0.356786 | 1     | 0.992 | 6.46E-14 | LC |
| ARHGDIB    | 9.10E-18 | 0.832313 | 0.631 | 0.437 | 1.66E-13 | LC |

|           |          |          |       |       |          |    |
|-----------|----------|----------|-------|-------|----------|----|
| UPP1      | 9.48E-18 | 0.76839  | 0.415 | 0.186 | 1.73E-13 | LC |
| RPL11     | 1.00E-17 | 0.326436 | 1     | 0.999 | 1.82E-13 | LC |
| FAM46A    | 2.99E-17 | 1.004484 | 0.623 | 0.428 | 5.45E-13 | LC |
| RPL13A    | 6.68E-17 | 0.316561 | 0.992 | 0.999 | 1.22E-12 | LC |
| TXNIP     | 7.33E-17 | 1.015252 | 0.815 | 0.675 | 1.33E-12 | LC |
| RPS25     | 8.76E-17 | 0.296525 | 1     | 0.999 | 1.59E-12 | LC |
| HIST2H2AC | 1.71E-16 | 0.672371 | 0.323 | 0.121 | 3.11E-12 | LC |
| RPS9      | 1.81E-16 | 0.305096 | 1     | 0.998 | 3.30E-12 | LC |
| RPL30     | 2.72E-16 | 0.340235 | 1     | 0.998 | 4.96E-12 | LC |
| RPL12     | 2.81E-16 | 0.31314  | 1     | 0.998 | 5.12E-12 | LC |
| ATN1      | 3.85E-16 | 0.82472  | 0.338 | 0.133 | 7.01E-12 | LC |
| PHLDA1    | 4.45E-16 | 1.046924 | 0.438 | 0.205 | 8.10E-12 | LC |
| CMTM3     | 1.14E-15 | 0.447477 | 0.269 | 0.087 | 2.08E-11 | LC |
| PFN1      | 1.29E-15 | 0.594931 | 0.938 | 0.986 | 2.35E-11 | LC |
| RPS21     | 1.79E-15 | 0.389734 | 0.992 | 0.99  | 3.26E-11 | LC |
| RPS14     | 1.82E-15 | 0.321004 | 1     | 1     | 3.31E-11 | LC |
| FAM49B    | 2.44E-15 | 0.707159 | 0.477 | 0.277 | 4.45E-11 | LC |
| MYLIP     | 2.88E-15 | 0.898293 | 0.538 | 0.351 | 5.24E-11 | LC |
| RUNX1     | 5.56E-15 | 0.572986 | 0.331 | 0.133 | 1.01E-10 | LC |
| NFKBIE    | 7.13E-15 | 0.636046 | 0.338 | 0.14  | 1.30E-10 | LC |
| RPL5      | 7.75E-15 | 0.317762 | 0.985 | 0.993 | 1.41E-10 | LC |
| MCL1      | 8.83E-15 | 0.810607 | 0.769 | 0.699 | 1.61E-10 | LC |
| CNPY3     | 1.60E-14 | 0.59801  | 0.346 | 0.15  | 2.91E-10 | LC |
| RPL23A    | 2.42E-14 | 0.327139 | 0.992 | 0.999 | 4.40E-10 | LC |
| CD44      | 2.62E-14 | 0.732944 | 0.669 | 0.584 | 4.77E-10 | LC |
| SEC11A    | 2.74E-14 | 0.629678 | 0.715 | 0.713 | 4.99E-10 | LC |
| SNHG6     | 3.66E-14 | 0.592752 | 0.777 | 0.76  | 6.67E-10 | LC |
| RPS7      | 7.46E-14 | 0.321945 | 0.977 | 0.993 | 1.36E-09 | LC |
| KCNQ1OT1  | 9.07E-14 | 0.722739 | 0.423 | 0.223 | 1.65E-09 | LC |
| MTDH      | 9.87E-14 | 0.553367 | 0.669 | 0.573 | 1.80E-09 | LC |
| C1orf63   | 1.14E-13 | 0.848132 | 0.623 | 0.513 | 2.08E-09 | LC |
| IRF2BP2   | 1.32E-13 | 0.721223 | 0.531 | 0.352 | 2.41E-09 | LC |
| RHOG      | 2.25E-13 | 0.671905 | 0.454 | 0.274 | 4.09E-09 | LC |
| COMMD6    | 2.33E-13 | 0.512462 | 0.862 | 0.926 | 4.23E-09 | LC |
| TNFAIP8   | 3.41E-13 | 0.624768 | 0.315 | 0.133 | 6.22E-09 | LC |
| ETS2      | 4.85E-13 | 0.891785 | 0.523 | 0.357 | 8.83E-09 | LC |
| CLK1      | 5.12E-13 | 0.717843 | 0.677 | 0.61  | 9.32E-09 | LC |
| MEF2A     | 5.55E-13 | 0.510519 | 0.346 | 0.16  | 1.01E-08 | LC |
| IRF1      | 5.63E-13 | 0.71826  | 0.538 | 0.377 | 1.02E-08 | LC |
| EIF3F     | 6.31E-13 | 0.483773 | 0.746 | 0.773 | 1.15E-08 | LC |
| UBC       | 6.62E-13 | 0.429983 | 0.992 | 0.999 | 1.21E-08 | LC |
| HSP90AB1  | 7.57E-13 | 0.71667  | 0.923 | 0.964 | 1.38E-08 | LC |
| STX11     | 8.20E-13 | 0.756315 | 0.315 | 0.136 | 1.49E-08 | LC |
| HIST1H2BG | 1.05E-12 | 0.583723 | 0.277 | 0.104 | 1.91E-08 | LC |
| CELF2     | 1.05E-12 | 0.60641  | 0.369 | 0.183 | 1.92E-08 | LC |
| CTSB      | 1.15E-12 | 0.658533 | 0.746 | 0.783 | 2.09E-08 | LC |
| RBPJ      | 1.20E-12 | 0.647731 | 0.585 | 0.472 | 2.18E-08 | LC |
| MAP3K8    | 1.22E-12 | 0.830284 | 0.454 | 0.265 | 2.21E-08 | LC |

|             |          |          |       |       |          |    |
|-------------|----------|----------|-------|-------|----------|----|
| PPT1        | 1.59E-12 | 0.596916 | 0.662 | 0.582 | 2.90E-08 | LC |
| EIF5        | 2.96E-12 | 0.624473 | 0.738 | 0.72  | 5.38E-08 | LC |
| SKIL        | 3.53E-12 | 0.49343  | 0.285 | 0.115 | 6.43E-08 | LC |
| SAT1        | 1.16E-11 | 0.540443 | 1     | 0.991 | 2.11E-07 | LC |
| HLA-E       | 1.74E-11 | 0.502966 | 0.854 | 0.885 | 3.16E-07 | LC |
| IER5        | 1.79E-11 | 0.641856 | 0.5   | 0.351 | 3.25E-07 | LC |
| ALDH2       | 2.87E-11 | 0.663315 | 0.523 | 0.383 | 5.23E-07 | LC |
| RPL35A      | 3.53E-11 | 0.252562 | 1     | 0.998 | 6.43E-07 | LC |
| LSP1        | 3.63E-11 | 0.576226 | 0.531 | 0.328 | 6.61E-07 | LC |
| CKLF        | 4.09E-11 | 0.769244 | 0.462 | 0.314 | 7.44E-07 | LC |
| JMJD1C      | 4.09E-11 | 0.730144 | 0.438 | 0.271 | 7.45E-07 | LC |
| B2M         | 4.83E-11 | 0.349945 | 1     | 0.997 | 8.80E-07 | LC |
| RIPK2       | 6.51E-11 | 0.672344 | 0.346 | 0.178 | 1.19E-06 | LC |
| GRB2        | 6.93E-11 | 0.567387 | 0.415 | 0.251 | 1.26E-06 | LC |
| PCBP2       | 1.08E-10 | 0.465791 | 0.754 | 0.817 | 1.97E-06 | LC |
| HLA-C       | 1.28E-10 | 0.403933 | 0.923 | 0.957 | 2.33E-06 | LC |
| NRP2        | 1.64E-10 | 0.566876 | 0.292 | 0.133 | 2.98E-06 | LC |
| PPP1R10     | 2.97E-10 | 0.623435 | 0.431 | 0.278 | 5.41E-06 | LC |
| MARCKSL1    | 2.99E-10 | 0.628467 | 0.431 | 0.248 | 5.45E-06 | LC |
| ITSN2       | 3.33E-10 | 0.545256 | 0.369 | 0.21  | 6.07E-06 | LC |
| ARPC3       | 4.83E-10 | 0.439268 | 0.838 | 0.882 | 8.79E-06 | LC |
| TYMP        | 5.30E-10 | 0.678505 | 0.354 | 0.193 | 9.65E-06 | LC |
| INSIG1      | 6.88E-10 | 0.86857  | 0.385 | 0.226 | 1.25E-05 | LC |
| ZFAND5      | 9.22E-10 | 0.592408 | 0.685 | 0.664 | 1.68E-05 | LC |
| DUSP6       | 9.30E-10 | 0.688713 | 0.369 | 0.208 | 1.69E-05 | LC |
| ZNF503      | 1.11E-09 | 0.62175  | 0.362 | 0.204 | 2.03E-05 | LC |
| SEN3-EIF4A1 | 1.38E-09 | 0.317784 | 0.962 | 0.979 | 2.50E-05 | LC |
| CREM        | 1.60E-09 | 0.761563 | 0.354 | 0.204 | 2.91E-05 | LC |
| ZNF331      | 1.82E-09 | 0.63683  | 0.269 | 0.125 | 3.31E-05 | LC |
| DDX5        | 1.99E-09 | 0.412456 | 0.946 | 0.984 | 3.63E-05 | LC |
| TMEM107     | 2.18E-09 | 0.861328 | 0.423 | 0.284 | 3.97E-05 | LC |
| NXF1        | 2.50E-09 | 0.718621 | 0.392 | 0.242 | 4.55E-05 | LC |
| HIST1H1C    | 2.82E-09 | 0.686533 | 0.385 | 0.224 | 5.13E-05 | LC |
| HEXIM1      | 3.34E-09 | 0.728929 | 0.515 | 0.407 | 6.09E-05 | LC |
| WSB1        | 3.55E-09 | 0.700062 | 0.623 | 0.607 | 6.46E-05 | LC |
| CLEC2B      | 3.80E-09 | 0.56498  | 0.7   | 0.642 | 6.91E-05 | LC |
| LITAF       | 4.61E-09 | 0.691964 | 0.6   | 0.568 | 8.40E-05 | LC |
| ANXA5       | 4.70E-09 | 0.448469 | 0.585 | 0.416 | 8.56E-05 | LC |
| C6orf48     | 5.16E-09 | 0.486539 | 0.662 | 0.651 | 9.40E-05 | LC |
| NAMPT       | 5.66E-09 | 0.812013 | 0.485 | 0.394 | 0.000103 | LC |
| CLIC1       | 8.26E-09 | 0.318568 | 0.877 | 0.914 | 0.00015  | LC |
| ARMCX3      | 8.27E-09 | 0.384633 | 0.254 | 0.113 | 0.000151 | LC |
| GABARAP     | 9.22E-09 | 0.340637 | 0.9   | 0.954 | 0.000168 | LC |
| RPL29       | 9.32E-09 | 0.25189  | 0.992 | 0.993 | 0.00017  | LC |
| YBX1        | 1.07E-08 | 0.265897 | 0.977 | 0.982 | 0.000196 | LC |
| AKR1B1      | 1.16E-08 | 0.509906 | 0.577 | 0.467 | 0.00021  | LC |
| RAB32       | 1.32E-08 | 0.51103  | 0.308 | 0.16  | 0.00024  | LC |
| STK17B      | 1.99E-08 | 0.476981 | 0.262 | 0.125 | 0.000363 | LC |

|          |          |          |       |       |          |    |
|----------|----------|----------|-------|-------|----------|----|
| BRD2     | 4.65E-08 | 0.589692 | 0.615 | 0.596 | 0.000846 | LC |
| RBM3     | 4.82E-08 | 0.389302 | 0.869 | 0.916 | 0.000877 | LC |
| ZC3H12A  | 5.11E-08 | 0.637039 | 0.408 | 0.268 | 0.00093  | LC |
| AMD1     | 6.09E-08 | 0.536439 | 0.523 | 0.432 | 0.001109 | LC |
| TPM3     | 8.93E-08 | 0.411119 | 0.785 | 0.85  | 0.001625 | LC |
| ELF1     | 9.34E-08 | 0.503303 | 0.485 | 0.398 | 0.001701 | LC |
| HIST1H4C | 9.67E-08 | 0.598035 | 0.415 | 0.29  | 0.00176  | LC |
| IFRD1    | 1.02E-07 | 0.693964 | 0.492 | 0.411 | 0.001864 | LC |
| ARPC1B   | 1.03E-07 | 0.58804  | 0.577 | 0.601 | 0.001873 | LC |
| PNRC1    | 1.80E-07 | 0.543872 | 0.8   | 0.868 | 0.00328  | LC |
| SNHG8    | 1.82E-07 | 0.520909 | 0.692 | 0.701 | 0.003306 | LC |
| EIF4E    | 2.07E-07 | 0.620577 | 0.615 | 0.665 | 0.003774 | LC |
| CCNI     | 2.26E-07 | 0.417857 | 0.615 | 0.541 | 0.00412  | LC |
| KPNA2    | 3.43E-07 | 0.613651 | 0.4   | 0.287 | 0.006246 | LC |
| HLA-B    | 4.19E-07 | 0.454787 | 0.938 | 0.925 | 0.007633 | LC |
| PEA15    | 8.12E-07 | 0.510459 | 0.485 | 0.434 | 0.014791 | LC |
| NAP1L1   | 8.35E-07 | 0.463102 | 0.677 | 0.736 | 0.015196 | LC |
| TACC1    | 1.00E-06 | 0.518161 | 0.338 | 0.221 | 0.018248 | LC |
| TSPYL2   | 1.06E-06 | 0.525718 | 0.362 | 0.244 | 0.019365 | LC |
| SNHG1    | 1.23E-06 | 0.623394 | 0.315 | 0.197 | 0.022345 | LC |
| ZFAS1    | 1.60E-06 | 0.419906 | 0.785 | 0.867 | 0.029061 | LC |
| CFLAR    | 1.67E-06 | 0.654338 | 0.4   | 0.299 | 0.03046  | LC |
| B3GNT5   | 1.83E-06 | 0.485557 | 0.3   | 0.181 | 0.033265 | LC |
| GLA      | 2.11E-06 | 0.432831 | 0.285 | 0.168 | 0.038411 | LC |
| RPSA     | 2.28E-06 | 0.298111 | 0.8   | 0.871 | 0.041424 | LC |
| SH3BGRL  | 2.34E-06 | 0.535372 | 0.585 | 0.637 | 0.042678 | LC |
| UBB      | 2.40E-06 | 0.277942 | 0.977 | 0.979 | 0.043712 | LC |
| SLC25A6  | 2.53E-06 | 0.38049  | 0.823 | 0.898 | 0.046077 | LC |
| USP53    | 3.12E-06 | 0.452325 | 0.292 | 0.175 | 0.05687  | LC |
| RBM39    | 3.53E-06 | 0.31422  | 0.777 | 0.881 | 0.064323 | LC |
| HLA-A    | 3.76E-06 | 0.27661  | 0.892 | 0.962 | 0.068457 | LC |
| DNAJB1   | 4.29E-06 | 1.055537 | 0.792 | 0.914 | 0.07814  | LC |
| SOX4     | 6.13E-06 | 0.676412 | 0.462 | 0.382 | 0.111667 | LC |
| ARRDC3   | 7.43E-06 | 0.625011 | 0.392 | 0.287 | 0.13534  | LC |
| H2AFZ    | 1.16E-05 | 0.453032 | 0.785 | 0.897 | 0.212032 | LC |
| HEXB     | 1.49E-05 | 0.475646 | 0.477 | 0.43  | 0.271567 | LC |
| OAZ1     | 1.54E-05 | 0.273989 | 0.923 | 0.968 | 0.280366 | LC |
| BID      | 1.65E-05 | 0.458745 | 0.385 | 0.288 | 0.299898 | LC |
| PMAIP1   | 1.71E-05 | 0.296182 | 0.769 | 0.705 | 0.311541 | LC |
| BTG2     | 1.77E-05 | 0.447526 | 0.638 | 0.652 | 0.322915 | LC |
| PABPC4   | 1.81E-05 | 0.416312 | 0.308 | 0.207 | 0.329421 | LC |
| ZFP36L1  | 1.98E-05 | 0.405809 | 0.8   | 0.848 | 0.360525 | LC |
| SERTAD1  | 2.35E-05 | 0.47916  | 0.6   | 0.599 | 0.427391 | LC |
| DUSP1    | 2.50E-05 | 0.373364 | 0.969 | 0.988 | 0.454709 | LC |
| GNA15    | 3.12E-05 | 0.541085 | 0.354 | 0.262 | 0.567913 | LC |
| MAP1LC3B | 8.39E-05 | 0.432707 | 0.715 | 0.815 | 1        | LC |
| ARL4A    | 8.90E-05 | 0.392721 | 0.631 | 0.617 | 1        | LC |
| UBE2D3   | 9.32E-05 | 0.301729 | 0.838 | 0.919 | 1        | LC |

|              |          |          |       |       |        |
|--------------|----------|----------|-------|-------|--------|
| DRAM2        | 0.000139 | 0.388232 | 0.385 | 0.326 | 1 LC   |
| SNHG15       | 0.0002   | 0.452071 | 0.377 | 0.32  | 1 LC   |
| SLC7A5P2     | 0.000207 | 0.463049 | 0.377 | 0.31  | 1 LC   |
| SRSF2        | 0.000242 | 0.313409 | 0.792 | 0.884 | 1 LC   |
| LOC100996255 | 0.000261 | 0.353513 | 0.3   | 0.217 | 1 LC   |
| IFNGR1       | 0.000265 | 0.496832 | 0.531 | 0.563 | 1 LC   |
| PLK3         | 0.000317 | 0.390647 | 0.323 | 0.246 | 1 LC   |
| HIST2H2BE    | 0.000376 | 0.483221 | 0.338 | 0.258 | 1 LC   |
| CASP1        | 0.000411 | 0.386225 | 0.292 | 0.219 | 1 LC   |
| PELI1        | 0.000433 | 0.41154  | 0.308 | 0.228 | 1 LC   |
| PLBD1        | 0.000452 | 0.40102  | 0.285 | 0.201 | 1 LC   |
| TUBA1A       | 0.000453 | 0.444166 | 0.631 | 0.711 | 1 LC   |
| PRPF38B      | 0.000537 | 0.422364 | 0.485 | 0.519 | 1 LC   |
| PER1         | 0.000541 | 0.455772 | 0.362 | 0.302 | 1 LC   |
| HSPH1        | 0.000544 | 0.652611 | 0.377 | 0.34  | 1 LC   |
| SAT2         | 0.000565 | 0.472912 | 0.454 | 0.452 | 1 LC   |
| ZFAND2A      | 0.000813 | 0.639764 | 0.315 | 0.251 | 1 LC   |
| PPIF         | 0.000869 | 0.551297 | 0.285 | 0.22  | 1 LC   |
| CREG1        | 0.001062 | 0.401214 | 0.5   | 0.533 | 1 LC   |
| CHORDC1      | 0.001097 | 0.486889 | 0.254 | 0.183 | 1 LC   |
| MGAT1        | 0.001343 | 0.454293 | 0.354 | 0.316 | 1 LC   |
| ACTB         | 0.00141  | 0.360047 | 0.992 | 0.999 | 1 LC   |
| CCNL1        | 0.001427 | 0.30662  | 0.731 | 0.807 | 1 LC   |
| RHOB         | 0.001475 | 0.435337 | 0.662 | 0.776 | 1 LC   |
| DNAJA1       | 0.001932 | 0.433037 | 0.615 | 0.749 | 1 LC   |
| HBEGF        | 0.001938 | 0.470038 | 0.369 | 0.317 | 1 LC   |
| CKS2         | 0.002157 | 0.56613  | 0.369 | 0.338 | 1 LC   |
| GNAI2        | 0.002157 | 0.37524  | 0.415 | 0.406 | 1 LC   |
| H2AFY        | 0.002302 | 0.307195 | 0.592 | 0.705 | 1 LC   |
| LPAR6        | 0.002342 | 0.560369 | 0.462 | 0.487 | 1 LC   |
| CHD2         | 0.002665 | 0.363854 | 0.369 | 0.334 | 1 LC   |
| PLXDC2       | 0.002697 | 0.434938 | 0.254 | 0.192 | 1 LC   |
| CHCHD10      | 0.003143 | 0.286557 | 0.346 | 0.284 | 1 LC   |
| HMGB2        | 0.003234 | 0.542102 | 0.446 | 0.458 | 1 LC   |
| HSPA2        | 0.003838 | 0.505718 | 0.423 | 0.409 | 1 LC   |
| USP15        | 0.005239 | 0.336445 | 0.254 | 0.198 | 1 LC   |
| SOCS3        | 0.005484 | 0.405739 | 0.377 | 0.333 | 1 LC   |
| DHRS7        | 0.006669 | 0.338873 | 0.415 | 0.427 | 1 LC   |
| ZCCHC6       | 0.007467 | 0.355954 | 0.277 | 0.231 | 1 LC   |
| BHLHE41      | 0.008211 | 0.38149  | 0.362 | 0.334 | 1 LC   |
| PYCARD       | 0.008919 | 0.330756 | 0.5   | 0.544 | 1 LC   |
| CEBPB        | 0.00938  | 0.77877  | 0.546 | 0.648 | 1 LC   |
| DCT          | 0        | 4.497885 | 1     | 0.008 | 0 Mela |
| PMEL         | 0        | 3.925314 | 0.942 | 0.016 | 0 Mela |
| TYRP1        | 0        | 3.708586 | 0.962 | 0.006 | 0 Mela |
| MLANA        | 0        | 3.648404 | 1     | 0.009 | 0 Mela |
| GPX3         | 0        | 3.192207 | 0.981 | 0.021 | 0 Mela |
| CAPN3        | 0        | 2.902548 | 0.981 | 0.013 | 0 Mela |



|               |           |          |       |       |           |      |
|---------------|-----------|----------|-------|-------|-----------|------|
| MITF          | 0         | 2.597103 | 0.942 | 0.019 | 0         | Mela |
| BX647938      | 0         | 2.043014 | 0.75  | 0.004 | 0         | Mela |
| DKFZp434C0631 | 0         | 1.702232 | 0.75  | 0.004 | 0         | Mela |
| PLP1          | 0         | 1.621851 | 0.75  | 0.005 | 0         | Mela |
| BCAN          | 0         | 1.610229 | 0.731 | 0.001 | 0         | Mela |
| TYR           | 0         | 1.442724 | 0.615 | 0.001 | 0         | Mela |
| PCSK2         | 0         | 1.378967 | 0.577 | 0.002 | 0         | Mela |
| TRPM1         | 0         | 1.376101 | 0.635 | 0.001 | 0         | Mela |
| LINC00462     | 0         | 1.357649 | 0.673 | 0.001 | 0         | Mela |
| GAPDHS        | 0         | 1.270296 | 0.615 | 0.002 | 0         | Mela |
| LOC100127888  | 0         | 1.25639  | 0.635 | 0.001 | 0         | Mela |
| SOX10         | 0         | 0.986244 | 0.5   | 0     | 0         | Mela |
| WDR63         | 0         | 0.843358 | 0.346 | 0.002 | 0         | Mela |
| PAX3          | 0         | 0.804819 | 0.404 | 0     | 0         | Mela |
| ROPN1         | 0         | 0.746952 | 0.365 | 0.004 | 0         | Mela |
| AIF1L         | 0         | 0.722407 | 0.404 | 0.002 | 0         | Mela |
| ALX1          | 0         | 0.668171 | 0.288 | 0     | 0         | Mela |
| FABP7         | 0         | 0.655937 | 0.327 | 0.001 | 0         | Mela |
| CLEC12B       | 0         | 0.628756 | 0.327 | 0     | 0         | Mela |
| POSTN         | 0         | 0.611056 | 0.308 | 0.001 | 0         | Mela |
| TRIM63        | 0         | 0.610156 | 0.308 | 0     | 0         | Mela |
| SLC24A5       | 0         | 0.577065 | 0.308 | 0     | 0         | Mela |
| SLC45A2       | 0         | 0.56384  | 0.288 | 0     | 0         | Mela |
| C3orf79       | 0         | 0.556064 | 0.269 | 0.001 | 0         | Mela |
| KU-MEL-3      | 0         | 0.511254 | 0.288 | 0     | 0         | Mela |
| IDI2-AS1      | 4.76E-308 | 0.525249 | 0.269 | 0.002 | 8.66E-304 | Mela |
| TUBB4A        | 2.28E-292 | 0.560604 | 0.288 | 0.002 | 4.16E-288 | Mela |
| CA14          | 4.18E-289 | 0.760331 | 0.404 | 0.005 | 7.61E-285 | Mela |
| S100B         | 6.30E-248 | 0.979779 | 0.365 | 0.005 | 1.15E-243 | Mela |
| KCNAB2        | 4.65E-247 | 0.748671 | 0.385 | 0.005 | 8.47E-243 | Mela |
| SNCA          | 3.76E-240 | 1.791489 | 0.846 | 0.032 | 6.85E-236 | Mela |
| FGFBP2        | 4.92E-207 | 1.188093 | 0.385 | 0.007 | 8.96E-203 | Mela |
| GPR143        | 3.41E-204 | 1.72534  | 0.769 | 0.031 | 6.21E-200 | Mela |
| PTPLA         | 4.15E-198 | 0.651282 | 0.308 | 0.004 | 7.55E-194 | Mela |
| APOE          | 3.90E-180 | 3.248988 | 0.923 | 0.054 | 7.09E-176 | Mela |
| GCNT2         | 2.22E-166 | 1.083158 | 0.481 | 0.014 | 4.04E-162 | Mela |
| GPM6B         | 3.14E-164 | 1.855595 | 0.885 | 0.054 | 5.71E-160 | Mela |
| LINC00681     | 5.47E-161 | 1.05086  | 0.423 | 0.011 | 9.97E-157 | Mela |
| MSC           | 6.10E-154 | 0.684891 | 0.288 | 0.005 | 1.11E-149 | Mela |
| GYPC          | 8.27E-132 | 1.767811 | 0.846 | 0.062 | 1.51E-127 | Mela |
| GMPR          | 3.94E-121 | 1.975518 | 0.865 | 0.071 | 7.18E-117 | Mela |
| MCOLN3        | 4.66E-117 | 0.795085 | 0.385 | 0.013 | 8.49E-113 | Mela |
| TBC1D16       | 1.67E-113 | 0.958844 | 0.404 | 0.015 | 3.03E-109 | Mela |
| MIA           | 1.08E-108 | 0.504788 | 0.269 | 0.007 | 1.98E-104 | Mela |
| ROPN1B        | 4.43E-107 | 0.803208 | 0.346 | 0.011 | 8.07E-103 | Mela |
| EDNRB         | 3.21E-106 | 2.302705 | 0.981 | 0.112 | 5.85E-102 | Mela |
| P2RX7         | 1.75E-101 | 0.671959 | 0.288 | 0.008 | 3.19E-97  | Mela |
| TRIB2         | 6.07E-90  | 0.891073 | 0.481 | 0.027 | 1.11E-85  | Mela |

|              |          |          |       |       |          |      |
|--------------|----------|----------|-------|-------|----------|------|
| TMOD1        | 3.25E-85 | 0.507051 | 0.269 | 0.009 | 5.91E-81 | Mela |
| QPCT         | 9.63E-84 | 2.822981 | 0.981 | 0.148 | 1.75E-79 | Mela |
| CDC42EP3     | 5.96E-74 | 1.757835 | 0.904 | 0.137 | 1.08E-69 | Mela |
| SLCO4A1      | 7.67E-72 | 0.788597 | 0.404 | 0.024 | 1.40E-67 | Mela |
| AKAP12       | 1.25E-66 | 0.934762 | 0.538 | 0.046 | 2.28E-62 | Mela |
| ENPP2        | 7.83E-63 | 0.869541 | 0.404 | 0.027 | 1.43E-58 | Mela |
| STMN1        | 3.59E-62 | 1.983067 | 0.981 | 0.205 | 6.54E-58 | Mela |
| AP1S2        | 5.83E-59 | 1.510021 | 0.75  | 0.112 | 1.06E-54 | Mela |
| PHLDA1       | 2.14E-54 | 1.640152 | 0.942 | 0.205 | 3.90E-50 | Mela |
| CHCHD6       | 1.33E-48 | 1.720097 | 0.808 | 0.17  | 2.42E-44 | Mela |
| CYB561A3     | 7.87E-44 | 1.995967 | 0.846 | 0.22  | 1.43E-39 | Mela |
| FMN1         | 1.09E-43 | 0.661443 | 0.308 | 0.023 | 1.98E-39 | Mela |
| CAV1         | 1.65E-41 | 1.54441  | 0.923 | 0.263 | 3.00E-37 | Mela |
| ZEB2         | 2.15E-38 | 0.721378 | 0.327 | 0.029 | 3.91E-34 | Mela |
| MARCKSL1     | 1.19E-37 | 1.477914 | 0.865 | 0.248 | 2.17E-33 | Mela |
| ITM2C        | 9.00E-37 | 0.674498 | 0.346 | 0.033 | 1.64E-32 | Mela |
| SDCBP        | 1.70E-36 | 1.964614 | 1     | 0.564 | 3.09E-32 | Mela |
| VIM          | 4.70E-36 | 1.796825 | 1     | 0.329 | 8.56E-32 | Mela |
| C4orf48      | 1.19E-35 | 1.171414 | 0.692 | 0.154 | 2.18E-31 | Mela |
| CYGB         | 2.75E-34 | 0.564225 | 0.269 | 0.022 | 5.00E-30 | Mela |
| CD59         | 4.21E-32 | 1.864292 | 0.981 | 0.734 | 7.67E-28 | Mela |
| DUSP4        | 4.38E-32 | 0.790376 | 0.423 | 0.057 | 7.98E-28 | Mela |
| UBB          | 8.68E-32 | 1.471503 | 1     | 0.979 | 1.58E-27 | Mela |
| TUBB2B       | 1.34E-31 | 0.951447 | 0.423 | 0.059 | 2.43E-27 | Mela |
| CD44         | 1.85E-31 | 1.932622 | 0.962 | 0.583 | 3.38E-27 | Mela |
| BACE2        | 2.38E-31 | 1.098987 | 0.596 | 0.125 | 4.33E-27 | Mela |
| TFAP2A       | 4.36E-31 | 1.493326 | 0.885 | 0.385 | 7.94E-27 | Mela |
| ST3GAL4      | 8.81E-31 | 1.293055 | 0.865 | 0.334 | 1.60E-26 | Mela |
| PMP22        | 2.89E-30 | 1.081863 | 0.788 | 0.181 | 5.26E-26 | Mela |
| RAB32        | 5.55E-30 | 1.222758 | 0.654 | 0.16  | 1.01E-25 | Mela |
| SNHG7        | 1.65E-29 | 1.538661 | 0.942 | 0.598 | 3.00E-25 | Mela |
| GPNMB        | 6.30E-29 | 1.806533 | 0.942 | 0.551 | 1.15E-24 | Mela |
| FEZ1         | 7.21E-29 | 0.809345 | 0.365 | 0.047 | 1.31E-24 | Mela |
| DLC1         | 1.51E-28 | 0.566262 | 0.308 | 0.034 | 2.76E-24 | Mela |
| RPL13        | 4.42E-28 | 0.904969 | 1     | 0.999 | 8.04E-24 | Mela |
| CDH3         | 7.53E-28 | 0.848754 | 0.385 | 0.055 | 1.37E-23 | Mela |
| PLEKHA5      | 8.17E-28 | 1.416959 | 0.692 | 0.205 | 1.49E-23 | Mela |
| ANXA5        | 2.27E-27 | 1.407987 | 0.923 | 0.415 | 4.14E-23 | Mela |
| RPS2         | 4.31E-27 | 0.879992 | 1     | 0.997 | 7.84E-23 | Mela |
| ARMCX1       | 5.75E-27 | 0.808603 | 0.442 | 0.075 | 1.05E-22 | Mela |
| SGCE         | 1.57E-26 | 0.497514 | 0.269 | 0.028 | 2.85E-22 | Mela |
| GNB2L1       | 4.20E-26 | 0.820604 | 1     | 0.99  | 7.64E-22 | Mela |
| VAT1         | 9.02E-26 | 1.083396 | 0.673 | 0.205 | 1.64E-21 | Mela |
| C17orf76-AS1 | 1.16E-25 | 1.038579 | 0.981 | 0.964 | 2.11E-21 | Mela |
| CD63         | 1.29E-25 | 1.164526 | 1     | 0.98  | 2.35E-21 | Mela |
| EEF1A1       | 7.90E-25 | 0.764884 | 1     | 1     | 1.44E-20 | Mela |
| ST3GAL5      | 1.57E-24 | 0.692528 | 0.346 | 0.05  | 2.86E-20 | Mela |
| RPS27A       | 1.74E-24 | 0.789334 | 1     | 0.997 | 3.18E-20 | Mela |

|            |          |          |       |       |          |      |
|------------|----------|----------|-------|-------|----------|------|
| RPL13A     | 3.22E-24 | 0.686339 | 1     | 0.999 | 5.85E-20 | Mela |
| PLOD3      | 6.97E-24 | 0.611181 | 0.365 | 0.057 | 1.27E-19 | Mela |
| RPS6       | 7.23E-24 | 0.779525 | 1     | 0.999 | 1.32E-19 | Mela |
| HSD17B11   | 1.06E-23 | 0.871777 | 0.519 | 0.115 | 1.93E-19 | Mela |
| RPL3       | 3.67E-23 | 0.595082 | 1     | 0.999 | 6.69E-19 | Mela |
| CYP27A1    | 4.32E-23 | 0.833123 | 0.442 | 0.086 | 7.87E-19 | Mela |
| LOC729732  | 5.32E-23 | 0.9983   | 0.538 | 0.132 | 9.68E-19 | Mela |
| KLF6       | 8.84E-23 | 1.868351 | 0.904 | 0.676 | 1.61E-18 | Mela |
| HNMT       | 1.84E-22 | 0.466476 | 0.308 | 0.042 | 3.35E-18 | Mela |
| RPS19      | 5.40E-22 | 0.804156 | 1     | 0.998 | 9.83E-18 | Mela |
| RGS3       | 7.51E-22 | 0.779868 | 0.481 | 0.108 | 1.37E-17 | Mela |
| RPL17      | 1.52E-21 | 0.846308 | 1     | 0.985 | 2.77E-17 | Mela |
| EFHD1      | 2.49E-21 | 0.671471 | 0.519 | 0.113 | 4.54E-17 | Mela |
| RPL6       | 2.62E-21 | 0.671177 | 1     | 0.992 | 4.77E-17 | Mela |
| CYTH3      | 2.63E-21 | 0.612061 | 0.327 | 0.051 | 4.78E-17 | Mela |
| RPL19      | 2.83E-21 | 0.591292 | 1     | 0.999 | 5.15E-17 | Mela |
| RPL10      | 3.39E-21 | 0.619119 | 1     | 1     | 6.17E-17 | Mela |
| FDFT1      | 2.18E-20 | 1.104135 | 0.827 | 0.481 | 3.97E-16 | Mela |
| SEPT4      | 2.39E-20 | 0.506756 | 0.308 | 0.046 | 4.36E-16 | Mela |
| RPS7       | 2.51E-20 | 0.669983 | 1     | 0.993 | 4.57E-16 | Mela |
| ANXA6      | 3.00E-20 | 0.542452 | 0.308 | 0.046 | 5.47E-16 | Mela |
| RPS18      | 4.12E-20 | 0.609875 | 1     | 1     | 7.49E-16 | Mela |
| CLCN7      | 4.91E-20 | 0.625216 | 0.327 | 0.054 | 8.94E-16 | Mela |
| RPS5       | 7.93E-20 | 0.699324 | 1     | 0.99  | 1.44E-15 | Mela |
| RPL37A     | 1.15E-19 | 0.589973 | 1     | 0.998 | 2.09E-15 | Mela |
| PYURF      | 1.26E-19 | 1.240681 | 0.885 | 0.687 | 2.29E-15 | Mela |
| PIP4K2A    | 1.57E-19 | 0.562623 | 0.269 | 0.038 | 2.86E-15 | Mela |
| CCDC61     | 1.92E-19 | 0.642055 | 0.327 | 0.055 | 3.49E-15 | Mela |
| ST6GALNAC2 | 1.93E-19 | 1.107689 | 0.538 | 0.155 | 3.52E-15 | Mela |
| RPL32      | 2.10E-19 | 0.608579 | 1     | 0.999 | 3.81E-15 | Mela |
| ID2        | 2.20E-19 | 1.355503 | 0.904 | 0.559 | 4.01E-15 | Mela |
| RPL7A      | 3.99E-19 | 0.654511 | 1     | 0.987 | 7.26E-15 | Mela |
| LGALS1     | 6.70E-19 | 0.651405 | 0.904 | 0.326 | 1.22E-14 | Mela |
| RPL29      | 8.30E-19 | 0.65385  | 0.981 | 0.993 | 1.51E-14 | Mela |
| NPM1       | 8.46E-19 | 0.794059 | 0.981 | 0.928 | 1.54E-14 | Mela |
| ILVBL      | 1.05E-18 | 1.22137  | 0.692 | 0.3   | 1.92E-14 | Mela |
| RPS10      | 1.50E-18 | 0.790088 | 1     | 0.978 | 2.73E-14 | Mela |
| DSTYK      | 2.01E-18 | 0.700793 | 0.346 | 0.064 | 3.67E-14 | Mela |
| RPL18A     | 2.04E-18 | 0.527755 | 1     | 0.997 | 3.71E-14 | Mela |
| TFAP2B     | 2.14E-18 | 0.972014 | 0.5   | 0.13  | 3.90E-14 | Mela |
| RPS28      | 2.65E-18 | 0.523103 | 1     | 0.999 | 4.82E-14 | Mela |
| A1BG       | 3.81E-18 | 0.683501 | 0.385 | 0.078 | 6.94E-14 | Mela |
| RPL5       | 1.16E-17 | 0.655438 | 1     | 0.993 | 2.12E-13 | Mela |
| LMNA       | 1.18E-17 | 0.99249  | 1     | 0.967 | 2.14E-13 | Mela |
| RPL36A     | 1.24E-17 | 0.736082 | 1     | 0.989 | 2.26E-13 | Mela |
| RPS3       | 1.39E-17 | 0.682495 | 1     | 0.996 | 2.53E-13 | Mela |
| RPS3A      | 1.52E-17 | 0.603198 | 1     | 0.998 | 2.77E-13 | Mela |
| JUN        | 1.54E-17 | 1.032101 | 1     | 0.979 | 2.80E-13 | Mela |

|         |          |          |       |       |          |      |
|---------|----------|----------|-------|-------|----------|------|
| CHPT1   | 2.12E-17 | 0.619428 | 0.385 | 0.081 | 3.86E-13 | Mela |
| RPL26   | 2.28E-17 | 0.570487 | 1     | 0.999 | 4.15E-13 | Mela |
| RPL34   | 2.34E-17 | 0.549759 | 1     | 1     | 4.27E-13 | Mela |
| RPL10A  | 2.77E-17 | 0.624758 | 1     | 0.995 | 5.05E-13 | Mela |
| RPL18   | 5.53E-17 | 0.619934 | 1     | 0.996 | 1.01E-12 | Mela |
| PNMA1   | 7.81E-17 | 0.554203 | 0.365 | 0.077 | 1.42E-12 | Mela |
| RPS15   | 1.31E-16 | 0.455596 | 1     | 1     | 2.39E-12 | Mela |
| RPS14   | 1.35E-16 | 0.540952 | 1     | 1     | 2.46E-12 | Mela |
| GAS5    | 1.62E-16 | 0.832326 | 1     | 0.934 | 2.95E-12 | Mela |
| RPL14   | 1.93E-16 | 0.534402 | 1     | 0.995 | 3.52E-12 | Mela |
| PAG1    | 2.13E-16 | 0.522275 | 0.288 | 0.05  | 3.88E-12 | Mela |
| METTL9  | 2.48E-16 | 1.302274 | 0.788 | 0.553 | 4.52E-12 | Mela |
| BTG1    | 2.59E-16 | 0.779708 | 1     | 0.953 | 4.71E-12 | Mela |
| RPL12   | 2.71E-16 | 0.614812 | 1     | 0.998 | 4.93E-12 | Mela |
| RPL41   | 3.03E-16 | 0.448322 | 1     | 1     | 5.52E-12 | Mela |
| RPS9    | 4.45E-16 | 0.562422 | 1     | 0.998 | 8.11E-12 | Mela |
| TOMM7   | 4.92E-16 | 0.592908 | 1     | 0.969 | 8.96E-12 | Mela |
| GNPTAB  | 5.16E-16 | 0.606276 | 0.308 | 0.058 | 9.40E-12 | Mela |
| CTH     | 6.11E-16 | 0.643668 | 0.269 | 0.045 | 1.11E-11 | Mela |
| SNAI2   | 1.34E-15 | 1.062885 | 0.712 | 0.361 | 2.44E-11 | Mela |
| RPS4X   | 1.44E-15 | 0.530735 | 1     | 0.999 | 2.62E-11 | Mela |
| HSPA1B  | 2.60E-15 | 1.454713 | 0.846 | 0.712 | 4.73E-11 | Mela |
| RPL27A  | 2.99E-15 | 0.489618 | 1     | 0.998 | 5.45E-11 | Mela |
| EMP3    | 4.17E-15 | 0.891255 | 0.692 | 0.279 | 7.60E-11 | Mela |
| CCNI    | 6.23E-15 | 0.915841 | 0.846 | 0.54  | 1.13E-10 | Mela |
| EEF1G   | 6.73E-15 | 0.610547 | 0.981 | 0.988 | 1.23E-10 | Mela |
| RPLP0   | 7.19E-15 | 0.614044 | 1     | 0.992 | 1.31E-10 | Mela |
| RPL8    | 8.45E-15 | 0.512987 | 1     | 0.998 | 1.54E-10 | Mela |
| MLPH    | 9.77E-15 | 0.896129 | 0.577 | 0.23  | 1.78E-10 | Mela |
| RPL35A  | 1.31E-14 | 0.412185 | 1     | 0.998 | 2.38E-10 | Mela |
| RPS8    | 1.51E-14 | 0.55951  | 1     | 0.999 | 2.75E-10 | Mela |
| C9orf3  | 2.18E-14 | 1.006781 | 0.654 | 0.324 | 3.97E-10 | Mela |
| TUBA1A  | 4.24E-14 | 0.927278 | 0.923 | 0.709 | 7.71E-10 | Mela |
| AP3M2   | 4.55E-14 | 0.586034 | 0.308 | 0.065 | 8.29E-10 | Mela |
| NSG1    | 4.69E-14 | 0.975374 | 0.731 | 0.453 | 8.54E-10 | Mela |
| TGFB111 | 4.91E-14 | 0.548895 | 0.269 | 0.05  | 8.94E-10 | Mela |
| RPL31   | 5.72E-14 | 0.446113 | 1     | 0.998 | 1.04E-09 | Mela |
| SOX4    | 9.08E-14 | 1.024481 | 0.692 | 0.381 | 1.65E-09 | Mela |
| SLC25A6 | 1.13E-13 | 0.760323 | 0.923 | 0.897 | 2.06E-09 | Mela |
| C1orf85 | 1.17E-13 | 0.621598 | 0.385 | 0.105 | 2.13E-09 | Mela |
| PTTG1IP | 1.55E-13 | 1.250934 | 0.788 | 0.586 | 2.83E-09 | Mela |
| RPS16   | 1.69E-13 | 0.474835 | 1     | 0.994 | 3.08E-09 | Mela |
| MYC     | 1.84E-13 | 1.005725 | 0.846 | 0.566 | 3.35E-09 | Mela |
| DDIT4   | 2.44E-13 | 1.063466 | 0.75  | 0.463 | 4.43E-09 | Mela |
| RPL11   | 2.98E-13 | 0.410549 | 1     | 0.999 | 5.43E-09 | Mela |
| GLTSCR2 | 3.05E-13 | 0.776755 | 0.904 | 0.828 | 5.55E-09 | Mela |
| RPS17L  | 3.57E-13 | 0.450554 | 1     | 0.996 | 6.50E-09 | Mela |
| FAM213A | 4.22E-13 | 0.837765 | 0.692 | 0.344 | 7.69E-09 | Mela |

|                |          |          |       |       |          |      |
|----------------|----------|----------|-------|-------|----------|------|
| RPS11          | 4.79E-13 | 0.503926 | 0.981 | 0.985 | 8.73E-09 | Mela |
| RPL35          | 4.92E-13 | 0.450408 | 1     | 0.999 | 8.96E-09 | Mela |
| MYO10          | 6.52E-13 | 0.914201 | 0.731 | 0.491 | 1.19E-08 | Mela |
| MAGEH1         | 7.52E-13 | 0.614062 | 0.423 | 0.129 | 1.37E-08 | Mela |
| RPL39          | 1.05E-12 | 0.421884 | 1     | 0.999 | 1.91E-08 | Mela |
| RPS13          | 1.09E-12 | 0.433576 | 1     | 0.998 | 1.98E-08 | Mela |
| TM7SF3         | 1.24E-12 | 0.856798 | 0.596 | 0.287 | 2.25E-08 | Mela |
| EIF4A2         | 1.81E-12 | 0.794682 | 0.942 | 0.903 | 3.30E-08 | Mela |
| CEP72          | 2.13E-12 | 0.739648 | 0.346 | 0.092 | 3.88E-08 | Mela |
| RPL15          | 2.29E-12 | 0.384607 | 1     | 0.999 | 4.16E-08 | Mela |
| EEF2           | 4.02E-12 | 1.120132 | 0.846 | 0.874 | 7.33E-08 | Mela |
| C6orf1         | 5.14E-12 | 0.814662 | 0.462 | 0.166 | 9.36E-08 | Mela |
| GPR155         | 5.39E-12 | 0.554337 | 0.308 | 0.075 | 9.81E-08 | Mela |
| SLC25A5        | 5.98E-12 | 0.744452 | 0.942 | 0.874 | 1.09E-07 | Mela |
| SIGIRR         | 7.01E-12 | 0.764    | 0.596 | 0.294 | 1.28E-07 | Mela |
| PFKM           | 9.53E-12 | 0.629943 | 0.423 | 0.141 | 1.74E-07 | Mela |
| C1orf63        | 9.70E-12 | 0.831788 | 0.75  | 0.513 | 1.77E-07 | Mela |
| EEF1D          | 9.88E-12 | 0.479357 | 1     | 0.978 | 1.80E-07 | Mela |
| ENSG0000021008 | 1.01E-11 | 0.627623 | 1     | 1     | 1.85E-07 | Mela |
| SERPINF1       | 1.01E-11 | 0.889746 | 0.827 | 0.525 | 1.85E-07 | Mela |
| COX4I1         | 1.07E-11 | 0.423634 | 1     | 0.978 | 1.95E-07 | Mela |
| RPS27          | 1.29E-11 | 0.373358 | 1     | 1     | 2.34E-07 | Mela |
| MBP            | 1.47E-11 | 0.799786 | 0.481 | 0.192 | 2.69E-07 | Mela |
| NACA           | 1.57E-11 | 0.323988 | 1     | 0.996 | 2.86E-07 | Mela |
| CDK2           | 1.57E-11 | 0.800617 | 0.365 | 0.109 | 2.87E-07 | Mela |
| PTEN           | 1.78E-11 | 0.631776 | 0.365 | 0.109 | 3.24E-07 | Mela |
| ILK            | 2.06E-11 | 0.802511 | 0.615 | 0.341 | 3.74E-07 | Mela |
| MLEC           | 2.34E-11 | 1.039122 | 0.538 | 0.257 | 4.26E-07 | Mela |
| RPL7           | 2.42E-11 | 0.385623 | 1     | 0.999 | 4.41E-07 | Mela |
| RBM3           | 2.85E-11 | 0.612475 | 0.962 | 0.916 | 5.20E-07 | Mela |
| CERS4          | 3.36E-11 | 0.55491  | 0.308 | 0.079 | 6.11E-07 | Mela |
| HSPA2          | 3.87E-11 | 0.907458 | 0.692 | 0.408 | 7.05E-07 | Mela |
| CTSF           | 4.03E-11 | 0.745738 | 0.712 | 0.383 | 7.33E-07 | Mela |
| UBL3           | 4.48E-11 | 0.95381  | 0.596 | 0.305 | 8.16E-07 | Mela |
| RHOB           | 4.65E-11 | 1.171208 | 0.827 | 0.775 | 8.47E-07 | Mela |
| PTMA           | 5.73E-11 | 0.52288  | 1     | 0.996 | 1.04E-06 | Mela |
| PFDN5          | 5.89E-11 | 0.477412 | 0.962 | 0.974 | 1.07E-06 | Mela |
| ADIPOR2        | 7.18E-11 | 0.512506 | 0.327 | 0.092 | 1.31E-06 | Mela |
| FBXO32         | 7.64E-11 | 0.750189 | 0.519 | 0.232 | 1.39E-06 | Mela |
| TNFRSF14       | 7.97E-11 | 0.680079 | 0.327 | 0.092 | 1.45E-06 | Mela |
| PNRC1          | 8.11E-11 | 0.638864 | 0.942 | 0.868 | 1.48E-06 | Mela |
| KIT            | 9.45E-11 | 0.511328 | 0.327 | 0.09  | 1.72E-06 | Mela |
| RPSA           | 9.50E-11 | 0.639843 | 0.942 | 0.87  | 1.73E-06 | Mela |
| ENSG0000021007 | 9.61E-11 | 0.67855  | 0.308 | 0.081 | 1.75E-06 | Mela |
| TSPAN4         | 9.71E-11 | 0.691686 | 0.558 | 0.254 | 1.77E-06 | Mela |
| AF063596       | 1.14E-10 | 0.823021 | 0.577 | 0.289 | 2.07E-06 | Mela |
| FTL            | 1.57E-10 | 0.384012 | 1     | 0.996 | 2.86E-06 | Mela |
| HLA-E          | 1.77E-10 | 0.542508 | 0.904 | 0.885 | 3.22E-06 | Mela |

|                 |          |          |       |       |          |      |
|-----------------|----------|----------|-------|-------|----------|------|
| ENSG00000211451 | 1.82E-10 | 0.561013 | 1     | 0.997 | 3.31E-06 | Mela |
| EEF1B2          | 1.86E-10 | 0.607237 | 0.923 | 0.903 | 3.38E-06 | Mela |
| NPC2            | 1.98E-10 | 0.557698 | 0.923 | 0.869 | 3.61E-06 | Mela |
| EIF3D           | 2.51E-10 | 0.724099 | 0.788 | 0.66  | 4.57E-06 | Mela |
| RPL4            | 2.66E-10 | 0.430699 | 1     | 0.986 | 4.85E-06 | Mela |
| TMEM258         | 3.31E-10 | 0.550735 | 0.942 | 0.924 | 6.02E-06 | Mela |
| RPS12           | 3.88E-10 | 0.375382 | 1     | 0.999 | 7.07E-06 | Mela |
| RPLP2           | 4.10E-10 | 0.428074 | 1     | 0.999 | 7.46E-06 | Mela |
| STXBP6          | 4.22E-10 | 0.466914 | 0.288 | 0.075 | 7.69E-06 | Mela |
| RPL23A          | 4.24E-10 | 0.358885 | 1     | 0.999 | 7.72E-06 | Mela |
| HSP90AB1        | 4.44E-10 | 0.790303 | 0.981 | 0.963 | 8.09E-06 | Mela |
| H2AFJ           | 5.85E-10 | 0.838617 | 0.75  | 0.554 | 1.07E-05 | Mela |
| HPGD            | 6.89E-10 | 0.885624 | 0.442 | 0.169 | 1.26E-05 | Mela |
| ASAH1           | 6.96E-10 | 0.876031 | 0.788 | 0.673 | 1.27E-05 | Mela |
| RPL38           | 7.35E-10 | 0.421308 | 1     | 0.989 | 1.34E-05 | Mela |
| RPS15A          | 7.55E-10 | 0.398822 | 1     | 0.997 | 1.37E-05 | Mela |
| MT1F            | 7.59E-10 | 0.840633 | 0.365 | 0.123 | 1.38E-05 | Mela |
| CYSTM1          | 7.65E-10 | 0.808206 | 0.673 | 0.464 | 1.39E-05 | Mela |
| MSS51           | 8.21E-10 | 0.511043 | 1     | 0.979 | 1.50E-05 | Mela |
| RPL36AL         | 9.86E-10 | 0.529476 | 0.942 | 0.955 | 1.79E-05 | Mela |
| RPL24           | 1.22E-09 | 0.421782 | 1     | 0.994 | 2.23E-05 | Mela |
| ATP1A1          | 1.47E-09 | 0.728638 | 0.75  | 0.589 | 2.68E-05 | Mela |
| EID1            | 1.73E-09 | 0.514543 | 0.885 | 0.884 | 3.15E-05 | Mela |
| RPS25           | 1.73E-09 | 0.304784 | 1     | 0.999 | 3.16E-05 | Mela |
| PPP1R15A        | 1.82E-09 | 0.606834 | 0.962 | 0.917 | 3.31E-05 | Mela |
| TPPP3           | 1.95E-09 | 0.934637 | 0.288 | 0.077 | 3.55E-05 | Mela |
| CD99            | 2.12E-09 | 0.71449  | 0.904 | 0.899 | 3.86E-05 | Mela |
| SLC3A2          | 2.61E-09 | 0.686331 | 0.865 | 0.788 | 4.76E-05 | Mela |
| RPS20           | 2.99E-09 | 0.33752  | 1     | 0.997 | 5.45E-05 | Mela |
| ENSG00000198761 | 3.77E-09 | 0.549    | 0.981 | 0.984 | 6.87E-05 | Mela |
| RPS23           | 4.22E-09 | 0.336095 | 1     | 0.998 | 7.68E-05 | Mela |
| RPL37           | 5.53E-09 | 0.376331 | 1     | 0.995 | 0.000101 | Mela |
| EIF3L           | 7.82E-09 | 0.662083 | 0.865 | 0.818 | 0.000142 | Mela |
| PKIG            | 8.61E-09 | 0.660932 | 0.423 | 0.176 | 0.000157 | Mela |
| HSP90AA1        | 8.63E-09 | 0.60541  | 0.981 | 0.975 | 0.000157 | Mela |
| CCDC80          | 1.11E-08 | 0.609498 | 0.365 | 0.128 | 0.000203 | Mela |
| SNW1            | 1.30E-08 | 0.604991 | 0.731 | 0.588 | 0.000236 | Mela |
| EIF3E           | 1.89E-08 | 0.636295 | 0.865 | 0.822 | 0.000343 | Mela |
| CTSA            | 2.00E-08 | 0.754076 | 0.596 | 0.391 | 0.000365 | Mela |
| ACTG1           | 2.27E-08 | 0.470475 | 1     | 0.995 | 0.000413 | Mela |
| CELF2           | 3.00E-08 | 0.586237 | 0.423 | 0.184 | 0.000546 | Mela |
| VAMP5           | 3.55E-08 | 0.545019 | 0.365 | 0.133 | 0.000647 | Mela |
| FAM195B         | 4.16E-08 | 0.577052 | 0.385 | 0.155 | 0.000758 | Mela |
| NSMCE1          | 4.17E-08 | 0.704132 | 0.442 | 0.212 | 0.000758 | Mela |
| CYB5R3          | 4.33E-08 | 0.667357 | 0.615 | 0.423 | 0.000788 | Mela |
| GPR56           | 4.46E-08 | 0.874347 | 0.442 | 0.212 | 0.000812 | Mela |
| TMEM55A         | 5.76E-08 | 0.516254 | 0.365 | 0.137 | 0.001049 | Mela |
| TPP1            | 5.83E-08 | 0.586981 | 0.346 | 0.129 | 0.001062 | Mela |

|                 |          |          |       |       |          |      |
|-----------------|----------|----------|-------|-------|----------|------|
| SNHG16          | 5.87E-08 | 1.007911 | 0.654 | 0.512 | 0.001068 | Mela |
| CSRP1           | 5.87E-08 | 0.679839 | 0.635 | 0.461 | 0.00107  | Mela |
| RPL28           | 7.04E-08 | 0.317886 | 1     | 0.992 | 0.001281 | Mela |
| RAB7A           | 7.19E-08 | 0.570479 | 0.904 | 0.88  | 0.001309 | Mela |
| RSL24D1         | 8.68E-08 | 0.618402 | 0.769 | 0.668 | 0.00158  | Mela |
| HNRNPA0         | 1.11E-07 | 0.489473 | 0.904 | 0.874 | 0.002018 | Mela |
| PTRF            | 1.22E-07 | 0.742544 | 0.673 | 0.455 | 0.002226 | Mela |
| CPQ             | 1.65E-07 | 0.611646 | 0.385 | 0.146 | 0.003003 | Mela |
| ZNF106          | 1.91E-07 | 0.603351 | 0.327 | 0.123 | 0.003481 | Mela |
| RPS14P3         | 2.07E-07 | 0.497771 | 0.904 | 0.962 | 0.003771 | Mela |
| GNG11           | 2.22E-07 | 0.487964 | 0.481 | 0.202 | 0.004044 | Mela |
| PRELP           | 2.78E-07 | 0.408667 | 0.385 | 0.137 | 0.005063 | Mela |
| RPL22           | 3.41E-07 | 0.382083 | 1     | 0.994 | 0.006213 | Mela |
| CMTM3           | 3.50E-07 | 0.486027 | 0.269 | 0.088 | 0.00638  | Mela |
| UBXN1           | 3.79E-07 | 0.691274 | 0.692 | 0.649 | 0.006902 | Mela |
| MAP3K11         | 3.87E-07 | 0.342708 | 0.269 | 0.087 | 0.007046 | Mela |
| KMT2E           | 4.18E-07 | 0.663344 | 0.692 | 0.588 | 0.007617 | Mela |
| SLC44A1         | 4.79E-07 | 0.509299 | 0.308 | 0.111 | 0.008727 | Mela |
| HIST1H4C        | 5.46E-07 | 0.749367 | 0.5   | 0.291 | 0.009946 | Mela |
| ATP5G2          | 5.78E-07 | 0.394658 | 0.923 | 0.911 | 0.01052  | Mela |
| STX7            | 5.79E-07 | 0.714708 | 0.538 | 0.343 | 0.010543 | Mela |
| RPL27           | 7.16E-07 | 0.289834 | 1     | 0.994 | 0.013043 | Mela |
| SNHG6           | 7.19E-07 | 0.648929 | 0.769 | 0.76  | 0.013094 | Mela |
| HIBCH           | 7.25E-07 | 0.705917 | 0.519 | 0.34  | 0.0132   | Mela |
| ZFAND5          | 8.32E-07 | 0.539675 | 0.788 | 0.664 | 0.015153 | Mela |
| MSN             | 9.34E-07 | 0.537382 | 0.288 | 0.102 | 0.017015 | Mela |
| HSPA8           | 9.59E-07 | 0.664389 | 0.827 | 0.792 | 0.017456 | Mela |
| MYADM           | 9.83E-07 | 0.812642 | 0.481 | 0.269 | 0.017899 | Mela |
| DHRX            | 1.36E-06 | 0.448334 | 0.269 | 0.095 | 0.024845 | Mela |
| GABARAP         | 1.37E-06 | 0.419832 | 0.942 | 0.954 | 0.024911 | Mela |
| C12orf57        | 1.46E-06 | 0.487973 | 0.75  | 0.742 | 0.026523 | Mela |
| NAP1L1          | 1.74E-06 | 0.584367 | 0.769 | 0.736 | 0.031677 | Mela |
| TRIM47          | 1.81E-06 | 0.445421 | 0.308 | 0.119 | 0.033022 | Mela |
| TMEM147         | 1.93E-06 | 0.577105 | 0.712 | 0.637 | 0.035073 | Mela |
| HSPA1A          | 2.86E-06 | 1.085733 | 0.365 | 0.174 | 0.052038 | Mela |
| EIF3G           | 2.96E-06 | 0.54803  | 0.673 | 0.65  | 0.053852 | Mela |
| ZFAS1           | 3.11E-06 | 0.373156 | 0.865 | 0.867 | 0.056615 | Mela |
| HSPD1           | 3.43E-06 | 0.708702 | 0.731 | 0.69  | 0.06239  | Mela |
| ENSG0000021019  | 3.44E-06 | 0.896224 | 0.462 | 0.273 | 0.062668 | Mela |
| HYI             | 3.52E-06 | 0.429395 | 0.346 | 0.156 | 0.064124 | Mela |
| ABHD14B         | 3.75E-06 | 0.52759  | 0.462 | 0.27  | 0.068301 | Mela |
| IRS2            | 4.10E-06 | 0.502899 | 0.404 | 0.193 | 0.074573 | Mela |
| RNASEK-C17orf49 | 5.40E-06 | 0.457354 | 0.865 | 0.929 | 0.098302 | Mela |
| PABPC1          | 5.52E-06 | 0.533695 | 0.885 | 0.902 | 0.10046  | Mela |
| ARMCX3          | 5.57E-06 | 0.488095 | 0.288 | 0.114 | 0.101352 | Mela |
| SRSF8           | 5.58E-06 | 0.509855 | 0.558 | 0.414 | 0.101668 | Mela |
| HPS1            | 6.30E-06 | 0.43207  | 0.308 | 0.128 | 0.114778 | Mela |
| MXI1            | 6.31E-06 | 0.797584 | 0.404 | 0.218 | 0.114838 | Mela |

|                |          |          |       |       |          |      |
|----------------|----------|----------|-------|-------|----------|------|
| OPTN           | 8.64E-06 | 0.664907 | 0.5   | 0.343 | 0.157286 | Mela |
| B2M            | 8.73E-06 | 0.285841 | 1     | 0.997 | 0.159025 | Mela |
| VKORC1         | 8.85E-06 | 0.523991 | 0.558 | 0.411 | 0.161201 | Mela |
| AGPAT2         | 9.36E-06 | 0.615796 | 0.673 | 0.591 | 0.170423 | Mela |
| ENSG0000019884 | 1.06E-05 | 0.416298 | 0.942 | 0.883 | 0.193801 | Mela |
| GNG5           | 1.07E-05 | 0.388923 | 0.808 | 0.794 | 0.194513 | Mela |
| DHRS7          | 1.11E-05 | 0.686414 | 0.558 | 0.426 | 0.202392 | Mela |
| TCEAL8         | 1.12E-05 | 0.569407 | 0.615 | 0.538 | 0.203953 | Mela |
| LOC100506421   | 1.15E-05 | 0.396677 | 0.346 | 0.137 | 0.209    | Mela |
| CRYL1          | 1.18E-05 | 0.726901 | 0.423 | 0.252 | 0.21568  | Mela |
| C2orf69        | 1.28E-05 | 0.491827 | 0.269 | 0.106 | 0.232858 | Mela |
| FCGRT          | 1.38E-05 | 0.562981 | 0.481 | 0.31  | 0.250488 | Mela |
| AK291701       | 1.53E-05 | 0.427778 | 0.788 | 0.758 | 0.279154 | Mela |
| RHOA           | 1.54E-05 | 0.405278 | 0.808 | 0.875 | 0.280807 | Mela |
| OSBPL9         | 1.60E-05 | 0.499512 | 0.385 | 0.205 | 0.291627 | Mela |
| ENSG0000019888 | 1.63E-05 | 0.361853 | 0.923 | 0.96  | 0.295944 | Mela |
| TIMP2          | 1.74E-05 | 0.254718 | 0.365 | 0.146 | 0.317063 | Mela |
| CTSL1          | 1.88E-05 | 0.864509 | 0.577 | 0.495 | 0.341631 | Mela |
| SLC25A3        | 2.05E-05 | 0.422432 | 0.865 | 0.911 | 0.374165 | Mela |
| IRF2BP2        | 2.29E-05 | 0.649537 | 0.519 | 0.353 | 0.417105 | Mela |
| VMP1           | 2.31E-05 | 0.639649 | 0.519 | 0.383 | 0.421398 | Mela |
| SGK1           | 2.43E-05 | 1.029849 | 0.692 | 0.711 | 0.441695 | Mela |
| CALD1          | 2.52E-05 | 0.36964  | 0.519 | 0.289 | 0.458508 | Mela |
| RPS29          | 2.57E-05 | 0.265331 | 1     | 0.996 | 0.468197 | Mela |
| UBA2           | 2.78E-05 | 0.707349 | 0.442 | 0.276 | 0.506681 | Mela |
| EPB41L4A-AS1   | 2.80E-05 | 0.536413 | 0.615 | 0.525 | 0.509315 | Mela |
| LRPAP1         | 2.82E-05 | 0.4407   | 0.731 | 0.686 | 0.512564 | Mela |
| CISD1          | 2.88E-05 | 0.67812  | 0.519 | 0.386 | 0.525041 | Mela |
| HPCAL1         | 2.94E-05 | 0.439777 | 0.308 | 0.14  | 0.535639 | Mela |
| HLA-A          | 3.05E-05 | 0.699977 | 0.923 | 0.961 | 0.555761 | Mela |
| PHGDH          | 3.46E-05 | 0.744048 | 0.519 | 0.387 | 0.629468 | Mela |
| RHOBTB3        | 3.86E-05 | 0.571933 | 0.385 | 0.21  | 0.701921 | Mela |
| NEU1           | 4.11E-05 | 0.62794  | 0.442 | 0.292 | 0.748196 | Mela |
| PBRM1          | 4.80E-05 | 0.549686 | 0.346 | 0.181 | 0.873272 | Mela |
| MZT2B          | 4.84E-05 | 0.431089 | 0.731 | 0.702 | 0.880692 | Mela |
| IDI1           | 4.87E-05 | 0.655539 | 0.577 | 0.476 | 0.88587  | Mela |
| MMP24-AS1      | 5.63E-05 | 0.513621 | 0.404 | 0.24  | 1        | Mela |
| CPEB4          | 6.40E-05 | 0.480045 | 0.308 | 0.145 | 1        | Mela |
| EIF1           | 6.54E-05 | 0.257134 | 1     | 1     | 1        | Mela |
| SIAH1          | 7.90E-05 | 0.471872 | 0.308 | 0.152 | 1        | Mela |
| HPS4           | 8.85E-05 | 0.429357 | 0.269 | 0.12  | 1        | Mela |
| ARPC5          | 9.19E-05 | 0.482181 | 0.519 | 0.355 | 1        | Mela |
| FOS            | 0.000102 | 0.397861 | 0.981 | 0.974 | 1        | Mela |
| RPS27L         | 0.000104 | 0.376679 | 0.788 | 0.846 | 1        | Mela |
| YBX1           | 0.000111 | 0.314362 | 0.981 | 0.982 | 1        | Mela |
| CIRBP          | 0.000111 | 0.403184 | 0.923 | 0.981 | 1        | Mela |
| SEPT9          | 0.000113 | 0.434036 | 0.327 | 0.17  | 1        | Mela |
| EIF3K          | 0.000117 | 0.39334  | 0.865 | 0.897 | 1        | Mela |



|           |          |          |       |       |        |
|-----------|----------|----------|-------|-------|--------|
| ARL2      | 0.000128 | 0.454287 | 0.558 | 0.463 | 1 Mela |
| ARL6IP1   | 0.000142 | 0.403468 | 0.75  | 0.779 | 1 Mela |
| BAMBI     | 0.000161 | 0.552992 | 0.327 | 0.172 | 1 Mela |
| H2AFZ     | 0.00017  | 0.478788 | 0.865 | 0.896 | 1 Mela |
| PARVA     | 0.000177 | 0.556657 | 0.327 | 0.174 | 1 Mela |
| ZNF503    | 0.000192 | 0.420952 | 0.365 | 0.205 | 1 Mela |
| PEPD      | 0.000194 | 0.512111 | 0.462 | 0.334 | 1 Mela |
| S100A13   | 0.0002   | 0.374141 | 0.673 | 0.616 | 1 Mela |
| FBXO7     | 0.000228 | 0.647293 | 0.519 | 0.436 | 1 Mela |
| FASTK     | 0.000248 | 0.596305 | 0.404 | 0.265 | 1 Mela |
| TNIP1     | 0.000253 | 0.428616 | 0.385 | 0.244 | 1 Mela |
| TAF1D     | 0.00026  | 0.53743  | 0.462 | 0.339 | 1 Mela |
| CRNDE     | 0.00026  | 0.540548 | 0.5   | 0.355 | 1 Mela |
| GSTO1     | 0.000267 | 0.373311 | 0.769 | 0.77  | 1 Mela |
| COMT      | 0.000282 | 0.433162 | 0.846 | 0.863 | 1 Mela |
| FSCN1     | 0.000289 | 0.481476 | 0.404 | 0.246 | 1 Mela |
| SEC22C    | 0.000296 | 0.404752 | 0.308 | 0.164 | 1 Mela |
| TMSB10    | 0.00032  | 0.34175  | 0.981 | 0.997 | 1 Mela |
| NAMPT     | 0.000325 | 0.532232 | 0.5   | 0.394 | 1 Mela |
| TRA2B     | 0.000328 | 0.465371 | 0.75  | 0.795 | 1 Mela |
| CLTA      | 0.000328 | 0.382368 | 0.808 | 0.853 | 1 Mela |
| PLTP      | 0.000352 | 0.414817 | 0.269 | 0.128 | 1 Mela |
| ZFP36L2   | 0.000355 | 0.596506 | 0.596 | 0.522 | 1 Mela |
| MYLIP     | 0.000355 | 0.668438 | 0.462 | 0.352 | 1 Mela |
| ESD       | 0.000364 | 0.560263 | 0.577 | 0.534 | 1 Mela |
| NTAN1     | 0.000375 | 0.640932 | 0.385 | 0.249 | 1 Mela |
| FBXW5     | 0.000402 | 0.626651 | 0.404 | 0.276 | 1 Mela |
| CLEC2D    | 0.000427 | 0.423283 | 0.269 | 0.132 | 1 Mela |
| RPL9      | 0.000457 | 0.381761 | 0.788 | 0.787 | 1 Mela |
| CRTAP     | 0.000479 | 0.476614 | 0.404 | 0.27  | 1 Mela |
| CYB5R1    | 0.000494 | 0.462734 | 0.442 | 0.324 | 1 Mela |
| CRIP2     | 0.000508 | 0.32862  | 0.385 | 0.219 | 1 Mela |
| IFI16     | 0.000569 | 0.522379 | 0.558 | 0.488 | 1 Mela |
| MTDH      | 0.000599 | 0.48349  | 0.615 | 0.574 | 1 Mela |
| GSTM3     | 0.000617 | 0.525672 | 0.385 | 0.231 | 1 Mela |
| HIST2H2BE | 0.000621 | 0.529461 | 0.404 | 0.259 | 1 Mela |
| SYNGR1    | 0.000643 | 0.609497 | 0.385 | 0.263 | 1 Mela |
| IMPDH2    | 0.000671 | 0.468216 | 0.519 | 0.466 | 1 Mela |
| TROVE2    | 0.000679 | 0.405491 | 0.423 | 0.303 | 1 Mela |
| CCT4      | 0.000679 | 0.476553 | 0.596 | 0.577 | 1 Mela |
| SLC35B2   | 0.000687 | 0.495146 | 0.365 | 0.239 | 1 Mela |
| FSTL1     | 0.000701 | 0.510686 | 0.269 | 0.132 | 1 Mela |
| CTSD      | 0.000743 | 0.353636 | 0.846 | 0.899 | 1 Mela |
| L32131    | 0.000748 | 0.548532 | 0.712 | 0.745 | 1 Mela |
| PRKCDBP   | 0.000758 | 0.396079 | 0.404 | 0.26  | 1 Mela |
| EIF1B     | 0.000801 | 0.40976  | 0.673 | 0.714 | 1 Mela |
| MAGED2    | 0.000833 | 0.601681 | 0.5   | 0.423 | 1 Mela |
| TTC3      | 0.000884 | 0.550688 | 0.404 | 0.281 | 1 Mela |

|           |          |          |       |       |        |
|-----------|----------|----------|-------|-------|--------|
| HIST1H2BK | 0.000899 | 0.602411 | 0.327 | 0.184 | 1 Mela |
| WBP5      | 0.001206 | 0.475714 | 0.577 | 0.482 | 1 Mela |
| SNHG5     | 0.001228 | 0.304648 | 0.865 | 0.919 | 1 Mela |
| MAD2L1BP  | 0.001273 | 0.489702 | 0.346 | 0.226 | 1 Mela |
| CCNDBP1   | 0.001275 | 0.466595 | 0.481 | 0.401 | 1 Mela |
| NR4A2     | 0.001297 | 0.584114 | 0.327 | 0.201 | 1 Mela |
| C6orf48   | 0.00132  | 0.397946 | 0.654 | 0.651 | 1 Mela |
| CCND3     | 0.001396 | 0.607833 | 0.442 | 0.365 | 1 Mela |
| CCNG1     | 0.001498 | 0.478427 | 0.442 | 0.339 | 1 Mela |
| HMG20B    | 0.001622 | 0.548377 | 0.442 | 0.361 | 1 Mela |
| RETSAT    | 0.001859 | 0.494839 | 0.288 | 0.167 | 1 Mela |
| PIR       | 0.001881 | 0.386179 | 0.615 | 0.531 | 1 Mela |
| PABPC4    | 0.001978 | 0.485249 | 0.327 | 0.208 | 1 Mela |
| RPS26     | 0.002005 | 0.318101 | 0.885 | 0.943 | 1 Mela |
| SLC7A5P2  | 0.002026 | 0.685067 | 0.404 | 0.311 | 1 Mela |
| RRAGC     | 0.002152 | 0.374445 | 0.365 | 0.243 | 1 Mela |
| SLC25A36  | 0.002168 | 0.517288 | 0.385 | 0.283 | 1 Mela |
| RNF114    | 0.002295 | 0.489606 | 0.558 | 0.556 | 1 Mela |
| ACYP1     | 0.002396 | 0.378089 | 0.442 | 0.351 | 1 Mela |
| BSG       | 0.002414 | 0.343956 | 0.75  | 0.85  | 1 Mela |
| ATP1B1    | 0.002708 | 0.535407 | 0.346 | 0.231 | 1 Mela |
| EIF3H     | 0.00278  | 0.36062  | 0.788 | 0.847 | 1 Mela |
| ST13      | 0.002938 | 0.340514 | 0.788 | 0.852 | 1 Mela |
| SSR2      | 0.003033 | 0.437676 | 0.654 | 0.693 | 1 Mela |
| ZFP36L1   | 0.003044 | 0.424928 | 0.788 | 0.848 | 1 Mela |
| EIF3F     | 0.003265 | 0.428242 | 0.712 | 0.773 | 1 Mela |
| RAB38     | 0.003286 | 0.577064 | 0.404 | 0.319 | 1 Mela |
| ABTB1     | 0.003298 | 0.340383 | 0.269 | 0.155 | 1 Mela |
| OXA1L     | 0.00333  | 0.430222 | 0.5   | 0.451 | 1 Mela |
| MAD2L2    | 0.003455 | 0.384067 | 0.269 | 0.157 | 1 Mela |
| TMED10    | 0.003502 | 0.425294 | 0.75  | 0.816 | 1 Mela |
| PCBP2     | 0.003615 | 0.340432 | 0.731 | 0.816 | 1 Mela |
| NARF      | 0.003707 | 0.390399 | 0.327 | 0.221 | 1 Mela |
| RWDD1     | 0.003862 | 0.366235 | 0.673 | 0.737 | 1 Mela |
| PRMT2     | 0.003927 | 0.473669 | 0.442 | 0.374 | 1 Mela |
| LETMD1    | 0.004302 | 0.360865 | 0.346 | 0.237 | 1 Mela |
| LAMP2     | 0.004633 | 0.462079 | 0.615 | 0.673 | 1 Mela |
| CCDC107   | 0.005413 | 0.459298 | 0.269 | 0.161 | 1 Mela |
| SAT2      | 0.00574  | 0.50728  | 0.481 | 0.452 | 1 Mela |
| DPP7      | 0.005751 | 0.523457 | 0.519 | 0.476 | 1 Mela |
| NR3C1     | 0.005885 | 0.449475 | 0.269 | 0.164 | 1 Mela |
| AMD1      | 0.005925 | 0.373534 | 0.5   | 0.432 | 1 Mela |
| TLE4      | 0.005937 | 0.470288 | 0.327 | 0.224 | 1 Mela |
| SYF2      | 0.006145 | 0.41999  | 0.673 | 0.775 | 1 Mela |
| FOSB      | 0.006291 | 0.296021 | 0.827 | 0.831 | 1 Mela |
| LITAF     | 0.007203 | 0.42283  | 0.558 | 0.568 | 1 Mela |
| RABAC1    | 0.007217 | 0.312426 | 0.692 | 0.757 | 1 Mela |
| SUCLG1    | 0.007439 | 0.390221 | 0.538 | 0.545 | 1 Mela |

|              |           |          |       |       |           |      |
|--------------|-----------|----------|-------|-------|-----------|------|
| NONO         | 0.008574  | 0.448167 | 0.519 | 0.518 | 1         | Mela |
| TBCC         | 0.008726  | 0.560479 | 0.385 | 0.317 | 1         | Mela |
| P4HB         | 0.008829  | 0.415105 | 0.577 | 0.619 | 1         | Mela |
| SWAP70       | 0.009056  | 0.449995 | 0.385 | 0.309 | 1         | Mela |
| GRSF1        | 0.009331  | 0.499645 | 0.404 | 0.349 | 1         | Mela |
| EMP1         | 0.009954  | 0.420024 | 0.923 | 0.925 | 1         | Mela |
| CLDN5        | 0         | 2.342112 | 0.344 | 0.001 | 0         | VEC  |
| C7           | 0         | 1.519548 | 0.375 | 0     | 0         | VEC  |
| CXCL12       | 0         | 1.052164 | 0.281 | 0     | 0         | VEC  |
| ECSCR        | 0         | 0.958011 | 0.375 | 0     | 0         | VEC  |
| LOC100505495 | 0         | 0.914476 | 0.312 | 0.001 | 0         | VEC  |
| GUCY1A3      | 0         | 0.732555 | 0.281 | 0.001 | 0         | VEC  |
| COL4A2       | 0         | 0.463422 | 0.312 | 0     | 0         | VEC  |
| COL4A1       | 0         | 0.458767 | 0.281 | 0     | 0         | VEC  |
| PECAM1       | 5.80E-256 | 0.701854 | 0.312 | 0.002 | 1.06E-251 | VEC  |
| RAMP2        | 2.29E-220 | 1.419387 | 0.625 | 0.011 | 4.18E-216 | VEC  |
| A2M          | 2.02E-192 | 0.725153 | 0.312 | 0.003 | 3.68E-188 | VEC  |
| TSPAN7       | 2.97E-168 | 0.98167  | 0.375 | 0.005 | 5.40E-164 | VEC  |
| RARRES2      | 2.96E-103 | 1.119344 | 0.312 | 0.006 | 5.39E-99  | VEC  |
| IL6          | 2.39E-93  | 0.88354  | 0.344 | 0.008 | 4.35E-89  | VEC  |
| ITM2A        | 5.14E-91  | 1.373683 | 0.531 | 0.02  | 9.36E-87  | VEC  |
| MFRP         | 2.33E-81  | 0.551276 | 0.344 | 0.009 | 4.24E-77  | VEC  |
| CPE          | 3.68E-68  | 1.681015 | 0.594 | 0.035 | 6.70E-64  | VEC  |
| DPT          | 3.30E-60  | 0.876632 | 0.281 | 0.009 | 6.01E-56  | VEC  |
| MEF2C        | 1.22E-58  | 0.596738 | 0.281 | 0.009 | 2.21E-54  | VEC  |
| CRISPLD2     | 7.92E-49  | 0.789043 | 0.375 | 0.019 | 1.44E-44  | VEC  |
| TFPI         | 2.81E-45  | 1.717443 | 0.688 | 0.072 | 5.12E-41  | VEC  |
| CTHRC1       | 8.12E-44  | 0.685151 | 0.344 | 0.018 | 1.48E-39  | VEC  |
| GYPC         | 3.37E-41  | 0.994915 | 0.625 | 0.063 | 6.14E-37  | VEC  |
| SRPX         | 1.18E-38  | 0.747991 | 0.312 | 0.017 | 2.14E-34  | VEC  |
| ABCA9        | 5.10E-38  | 0.704881 | 0.312 | 0.017 | 9.29E-34  | VEC  |
| C10orf10     | 1.52E-36  | 1.350345 | 0.562 | 0.059 | 2.76E-32  | VEC  |
| COL3A1       | 5.65E-36  | 1.020073 | 0.312 | 0.018 | 1.03E-31  | VEC  |
| MGP          | 2.20E-34  | 2.038732 | 0.844 | 0.142 | 4.01E-30  | VEC  |
| MEST         | 1.14E-29  | 0.963643 | 0.375 | 0.031 | 2.08E-25  | VEC  |
| LEPR         | 1.85E-29  | 1.074083 | 0.406 | 0.037 | 3.37E-25  | VEC  |
| NNMT         | 9.73E-29  | 1.557339 | 0.875 | 0.17  | 1.77E-24  | VEC  |
| ABCA8        | 1.95E-28  | 0.865905 | 0.281 | 0.018 | 3.56E-24  | VEC  |
| NKD2         | 2.59E-28  | 0.603177 | 0.344 | 0.027 | 4.71E-24  | VEC  |
| SOCS2        | 7.38E-28  | 0.75074  | 0.344 | 0.028 | 1.34E-23  | VEC  |
| MEG3         | 1.08E-27  | 0.813238 | 0.281 | 0.019 | 1.96E-23  | VEC  |
| PMP22        | 5.27E-26  | 1.326823 | 0.875 | 0.182 | 9.60E-22  | VEC  |
| PDK4         | 6.22E-26  | 0.879618 | 0.5   | 0.062 | 1.13E-21  | VEC  |
| LAMA4        | 2.65E-25  | 0.432784 | 0.281 | 0.02  | 4.83E-21  | VEC  |
| FAM105A      | 3.56E-25  | 0.997359 | 0.531 | 0.074 | 6.48E-21  | VEC  |
| GREM2        | 5.63E-25  | 0.677514 | 0.312 | 0.026 | 1.02E-20  | VEC  |
| C1R          | 2.32E-24  | 1.911892 | 0.781 | 0.179 | 4.22E-20  | VEC  |
| IFITM2       | 3.18E-24  | 1.190793 | 0.844 | 0.186 | 5.78E-20  | VEC  |

|          |          |          |       |       |          |     |
|----------|----------|----------|-------|-------|----------|-----|
| TCF4     | 7.95E-24 | 1.474401 | 0.719 | 0.144 | 1.45E-19 | VEC |
| IGFBP5   | 1.20E-23 | 1.77725  | 0.406 | 0.046 | 2.19E-19 | VEC |
| EMCN     | 2.01E-23 | 0.875447 | 0.469 | 0.061 | 3.67E-19 | VEC |
| PDGFRA   | 3.00E-23 | 0.686451 | 0.406 | 0.047 | 5.46E-19 | VEC |
| SPRY1    | 5.57E-23 | 1.63029  | 0.719 | 0.17  | 1.01E-18 | VEC |
| ARHGAP29 | 1.99E-22 | 1.264899 | 0.625 | 0.12  | 3.62E-18 | VEC |
| AQP1     | 3.07E-22 | 1.23604  | 0.844 | 0.183 | 5.59E-18 | VEC |
| VIM      | 4.67E-22 | 1.647404 | 1     | 0.33  | 8.50E-18 | VEC |
| IFITM1   | 5.68E-22 | 1.995206 | 0.906 | 0.329 | 1.03E-17 | VEC |
| SERPING1 | 4.50E-20 | 1.515313 | 0.875 | 0.238 | 8.19E-16 | VEC |
| TPM2     | 4.60E-20 | 0.661083 | 0.438 | 0.06  | 8.38E-16 | VEC |
| GEM      | 5.12E-20 | 1.312309 | 0.406 | 0.055 | 9.33E-16 | VEC |
| GGT5     | 1.24E-19 | 1.251697 | 0.5   | 0.083 | 2.26E-15 | VEC |
| GPM6B    | 1.56E-19 | 0.832668 | 0.406 | 0.056 | 2.84E-15 | VEC |
| SLC2A3   | 9.81E-19 | 0.973552 | 0.562 | 0.107 | 1.79E-14 | VEC |
| IFITM3   | 1.31E-18 | 1.537046 | 1     | 0.587 | 2.38E-14 | VEC |
| COL18A1  | 1.39E-18 | 0.594417 | 0.469 | 0.074 | 2.53E-14 | VEC |
| GNG11    | 2.51E-18 | 1.749652 | 0.75  | 0.202 | 4.58E-14 | VEC |
| ENG      | 3.38E-18 | 0.538505 | 0.344 | 0.041 | 6.15E-14 | VEC |
| PRELP    | 4.49E-18 | 1.538584 | 0.625 | 0.137 | 8.17E-14 | VEC |
| MFAP4    | 8.26E-18 | 1.519958 | 0.531 | 0.103 | 1.50E-13 | VEC |
| F2R      | 8.43E-18 | 1.190254 | 0.469 | 0.08  | 1.53E-13 | VEC |
| DAB2     | 1.84E-17 | 0.841988 | 0.594 | 0.118 | 3.35E-13 | VEC |
| IGFBP4   | 2.06E-17 | 1.218161 | 0.719 | 0.203 | 3.76E-13 | VEC |
| PPAP2B   | 2.10E-17 | 1.166543 | 0.75  | 0.2   | 3.83E-13 | VEC |
| C1S      | 2.15E-17 | 1.825482 | 0.656 | 0.162 | 3.92E-13 | VEC |
| ADAMTS1  | 2.49E-17 | 0.64458  | 0.375 | 0.052 | 4.54E-13 | VEC |
| COL6A1   | 4.97E-17 | 1.142152 | 0.688 | 0.166 | 9.05E-13 | VEC |
| CFH      | 5.53E-17 | 1.448007 | 0.688 | 0.166 | 1.01E-12 | VEC |
| CEBPD    | 6.09E-17 | 1.374764 | 0.969 | 0.602 | 1.11E-12 | VEC |
| SELM     | 8.29E-17 | 1.119943 | 0.906 | 0.342 | 1.51E-12 | VEC |
| FHL1     | 1.78E-16 | 0.914666 | 0.656 | 0.159 | 3.23E-12 | VEC |
| ANXA6    | 3.77E-16 | 0.61795  | 0.344 | 0.047 | 6.86E-12 | VEC |
| LHFP     | 3.98E-16 | 1.063036 | 0.781 | 0.248 | 7.24E-12 | VEC |
| SPON1    | 6.08E-16 | 0.466743 | 0.281 | 0.033 | 1.11E-11 | VEC |
| NTRK3    | 1.86E-15 | 0.547224 | 0.344 | 0.048 | 3.39E-11 | VEC |
| IGFBP7   | 2.18E-15 | 1.537144 | 0.969 | 0.658 | 3.98E-11 | VEC |
| ICAM1    | 7.04E-15 | 0.962375 | 0.406 | 0.071 | 1.28E-10 | VEC |
| CTGF     | 9.21E-15 | 1.35467  | 0.688 | 0.2   | 1.68E-10 | VEC |
| TWIST2   | 1.07E-14 | 0.735368 | 0.5   | 0.103 | 1.96E-10 | VEC |
| EGFL7    | 1.12E-14 | 0.992987 | 0.344 | 0.052 | 2.04E-10 | VEC |
| RPS27A   | 1.26E-14 | 0.712606 | 1     | 0.997 | 2.29E-10 | VEC |
| ARID5B   | 1.47E-14 | 1.230343 | 0.844 | 0.429 | 2.68E-10 | VEC |
| SPARCL1  | 2.14E-14 | 1.735045 | 0.75  | 0.268 | 3.90E-10 | VEC |
| SRGN     | 5.03E-14 | 0.39933  | 0.281 | 0.035 | 9.16E-10 | VEC |
| LGALS1   | 5.10E-14 | 1.097899 | 0.906 | 0.327 | 9.29E-10 | VEC |
| COL1A1   | 8.56E-14 | 0.838273 | 0.375 | 0.064 | 1.56E-09 | VEC |
| RGS16    | 1.37E-13 | 1.222785 | 0.625 | 0.181 | 2.49E-09 | VEC |

|          |          |          |       |       |          |     |
|----------|----------|----------|-------|-------|----------|-----|
| EEF1D    | 2.08E-13 | 0.645622 | 1     | 0.978 | 3.80E-09 | VEC |
| CCDC80   | 3.45E-13 | 0.657238 | 0.531 | 0.128 | 6.27E-09 | VEC |
| RPL10    | 5.79E-13 | 0.610982 | 1     | 1     | 1.05E-08 | VEC |
| BC005927 | 9.82E-13 | 0.847789 | 0.469 | 0.105 | 1.79E-08 | VEC |
| CH25H    | 2.11E-12 | 0.435472 | 0.281 | 0.041 | 3.84E-08 | VEC |
| FAM107A  | 2.16E-12 | 0.734479 | 0.406 | 0.081 | 3.93E-08 | VEC |
| HLA-DPB1 | 2.52E-12 | 0.6468   | 0.406 | 0.084 | 4.59E-08 | VEC |
| TGFB111  | 2.53E-12 | 0.487711 | 0.312 | 0.051 | 4.61E-08 | VEC |
| CCL2     | 2.55E-12 | 0.805969 | 0.469 | 0.101 | 4.65E-08 | VEC |
| CALD1    | 2.95E-12 | 1.101807 | 0.75  | 0.288 | 5.37E-08 | VEC |
| TUBB2B   | 3.02E-12 | 0.58596  | 0.344 | 0.059 | 5.50E-08 | VEC |
| B2M      | 3.64E-12 | 1.017189 | 1     | 0.997 | 6.62E-08 | VEC |
| TSC22D1  | 4.33E-12 | 1.407638 | 0.938 | 0.587 | 7.88E-08 | VEC |
| ZFP36L2  | 5.25E-12 | 1.252298 | 0.844 | 0.522 | 9.56E-08 | VEC |
| CNN3     | 5.79E-12 | 0.859175 | 0.844 | 0.36  | 1.05E-07 | VEC |
| CTSK     | 8.94E-12 | 0.933968 | 0.469 | 0.113 | 1.63E-07 | VEC |
| FGFR1    | 1.21E-11 | 0.703907 | 0.5   | 0.126 | 2.21E-07 | VEC |
| TIMP3    | 1.22E-11 | 1.380555 | 0.781 | 0.346 | 2.22E-07 | VEC |
| STOM     | 1.30E-11 | 0.91137  | 0.75  | 0.384 | 2.37E-07 | VEC |
| GADD45B  | 1.37E-11 | 0.976971 | 1     | 0.928 | 2.50E-07 | VEC |
| RPL13    | 1.46E-11 | 0.604186 | 1     | 0.999 | 2.66E-07 | VEC |
| ARMCX1   | 2.53E-11 | 0.612928 | 0.375 | 0.075 | 4.60E-07 | VEC |
| RPL12    | 2.55E-11 | 0.613614 | 1     | 0.998 | 4.64E-07 | VEC |
| PTMA     | 2.56E-11 | 0.870871 | 1     | 0.996 | 4.66E-07 | VEC |
| HLA-C    | 3.51E-11 | 0.791017 | 1     | 0.956 | 6.40E-07 | VEC |
| FBLN5    | 3.73E-11 | 0.715608 | 0.531 | 0.136 | 6.78E-07 | VEC |
| SERPINE1 | 4.74E-11 | 0.649049 | 0.312 | 0.055 | 8.63E-07 | VEC |
| ANXA5    | 6.59E-11 | 0.856834 | 0.844 | 0.416 | 1.20E-06 | VEC |
| AEBP1    | 7.79E-11 | 0.96489  | 0.469 | 0.122 | 1.42E-06 | VEC |
| EEF1A1   | 1.07E-10 | 0.531751 | 1     | 1     | 1.94E-06 | VEC |
| IL6ST    | 1.17E-10 | 0.718915 | 0.531 | 0.165 | 2.13E-06 | VEC |
| VWA1     | 1.35E-10 | 0.528792 | 0.344 | 0.07  | 2.46E-06 | VEC |
| NPM1     | 1.60E-10 | 0.651641 | 1     | 0.928 | 2.92E-06 | VEC |
| TGFBR3   | 2.14E-10 | 0.499806 | 0.312 | 0.059 | 3.89E-06 | VEC |
| SOCS3    | 2.47E-10 | 1.272682 | 0.719 | 0.333 | 4.50E-06 | VEC |
| PPAP2A   | 3.30E-10 | 0.936657 | 0.656 | 0.298 | 6.01E-06 | VEC |
| KLF2     | 3.43E-10 | 0.628322 | 0.312 | 0.061 | 6.24E-06 | VEC |
| MMP2     | 3.52E-10 | 0.941465 | 0.438 | 0.112 | 6.41E-06 | VEC |
| FIBIN    | 3.95E-10 | 0.686937 | 0.5   | 0.129 | 7.19E-06 | VEC |
| HSD17B11 | 4.06E-10 | 0.700986 | 0.438 | 0.116 | 7.40E-06 | VEC |
| RPL3     | 4.17E-10 | 0.489473 | 1     | 0.999 | 7.60E-06 | VEC |
| SNHG8    | 4.48E-10 | 0.957339 | 0.875 | 0.7   | 8.16E-06 | VEC |
| VAMP5    | 5.69E-10 | 0.71349  | 0.469 | 0.133 | 1.04E-05 | VEC |
| HSP90AB1 | 6.06E-10 | 0.621338 | 0.969 | 0.963 | 1.10E-05 | VEC |
| SEPP1    | 6.49E-10 | 1.266441 | 0.844 | 0.469 | 1.18E-05 | VEC |
| ZEB1     | 1.21E-09 | 0.385386 | 0.344 | 0.071 | 2.21E-05 | VEC |
| PRRX1    | 1.48E-09 | 0.906625 | 0.5   | 0.139 | 2.70E-05 | VEC |
| HLA-A    | 1.74E-09 | 0.893076 | 1     | 0.961 | 3.16E-05 | VEC |

|           |          |          |       |       |          |     |
|-----------|----------|----------|-------|-------|----------|-----|
| CPQ       | 1.94E-09 | 0.66432  | 0.5   | 0.146 | 3.54E-05 | VEC |
| CD63      | 2.16E-09 | 0.647962 | 1     | 0.98  | 3.94E-05 | VEC |
| SOD2      | 2.19E-09 | 1.926128 | 0.656 | 0.321 | 3.99E-05 | VEC |
| TSHZ2     | 2.29E-09 | 0.601778 | 0.312 | 0.064 | 4.17E-05 | VEC |
| RPL32     | 2.47E-09 | 0.54583  | 1     | 0.999 | 4.50E-05 | VEC |
| EFEMP2    | 2.69E-09 | 0.439648 | 0.344 | 0.076 | 4.90E-05 | VEC |
| MSN       | 3.24E-09 | 0.506506 | 0.406 | 0.102 | 5.90E-05 | VEC |
| RPS23     | 3.24E-09 | 0.566998 | 1     | 0.998 | 5.91E-05 | VEC |
| CDC42EP3  | 3.93E-09 | 0.700659 | 0.469 | 0.139 | 7.15E-05 | VEC |
| RPL7      | 4.90E-09 | 0.628603 | 1     | 0.999 | 8.92E-05 | VEC |
| NFKBIZ    | 4.93E-09 | 0.901906 | 0.688 | 0.343 | 8.98E-05 | VEC |
| TPST1     | 5.06E-09 | 0.432875 | 0.281 | 0.055 | 9.21E-05 | VEC |
| TXNIP     | 5.51E-09 | 1.216787 | 0.906 | 0.676 | 0.0001   | VEC |
| DPYSL2    | 6.16E-09 | 0.498687 | 0.469 | 0.134 | 0.000112 | VEC |
| COL1A2    | 7.02E-09 | 0.639295 | 0.531 | 0.158 | 0.000128 | VEC |
| PAM       | 7.31E-09 | 0.786808 | 0.5   | 0.153 | 0.000133 | VEC |
| CRIP2     | 7.45E-09 | 0.982854 | 0.562 | 0.219 | 0.000136 | VEC |
| SAV1      | 7.81E-09 | 0.417842 | 0.344 | 0.081 | 0.000142 | VEC |
| RPS27     | 7.98E-09 | 0.421231 | 1     | 1     | 0.000145 | VEC |
| PLSCR4    | 8.37E-09 | 0.477554 | 0.406 | 0.105 | 0.000152 | VEC |
| ACTN1     | 8.40E-09 | 0.802974 | 0.5   | 0.169 | 0.000153 | VEC |
| C1QTNF7   | 1.10E-08 | 0.492292 | 0.312 | 0.066 | 0.000199 | VEC |
| RPL35A    | 1.19E-08 | 0.444662 | 1     | 0.998 | 0.000218 | VEC |
| TIMP2     | 1.53E-08 | 0.5172   | 0.5   | 0.146 | 0.000279 | VEC |
| RPL17     | 1.73E-08 | 0.575667 | 1     | 0.985 | 0.000316 | VEC |
| RPS3      | 1.76E-08 | 0.524046 | 1     | 0.996 | 0.000321 | VEC |
| EPB41L2   | 1.83E-08 | 0.318436 | 0.312 | 0.067 | 0.000332 | VEC |
| SNAI1     | 1.87E-08 | 0.950702 | 0.438 | 0.135 | 0.000341 | VEC |
| HNRNPA1   | 2.01E-08 | 0.477132 | 1     | 0.97  | 0.000365 | VEC |
| RNASE4    | 2.09E-08 | 0.966638 | 0.656 | 0.293 | 0.00038  | VEC |
| SERPINH1  | 2.26E-08 | 0.773171 | 0.5   | 0.18  | 0.000412 | VEC |
| RPL6      | 2.37E-08 | 0.482121 | 0.969 | 0.992 | 0.000432 | VEC |
| KCTD12    | 2.60E-08 | 0.408606 | 0.344 | 0.081 | 0.000474 | VEC |
| VIT       | 2.66E-08 | 0.993948 | 0.469 | 0.17  | 0.000484 | VEC |
| RPS16     | 2.99E-08 | 0.402907 | 1     | 0.994 | 0.000545 | VEC |
| EEF2      | 3.41E-08 | 0.597421 | 0.938 | 0.874 | 0.00062  | VEC |
| MID1IP1   | 3.59E-08 | 1.040584 | 0.625 | 0.314 | 0.000654 | VEC |
| LEPROT    | 3.60E-08 | 0.779219 | 0.75  | 0.505 | 0.000656 | VEC |
| SH3BP5    | 4.27E-08 | 0.600491 | 0.344 | 0.09  | 0.000778 | VEC |
| RPS2      | 5.05E-08 | 0.603763 | 1     | 0.997 | 0.000919 | VEC |
| RPL13A    | 5.55E-08 | 0.449744 | 1     | 0.999 | 0.001011 | VEC |
| PITX2     | 6.74E-08 | 0.596508 | 0.406 | 0.113 | 0.001226 | VEC |
| LAMC1     | 6.92E-08 | 0.391309 | 0.281 | 0.062 | 0.00126  | VEC |
| MAGI2-AS3 | 7.62E-08 | 0.45475  | 0.312 | 0.074 | 0.001387 | VEC |
| RPS15     | 8.37E-08 | 0.326142 | 1     | 1     | 0.001524 | VEC |
| RPS6      | 9.30E-08 | 0.454092 | 1     | 0.999 | 0.001693 | VEC |
| ZBTB16    | 9.36E-08 | 0.800983 | 0.312 | 0.077 | 0.001703 | VEC |
| COL6A2    | 9.39E-08 | 0.632152 | 0.375 | 0.103 | 0.00171  | VEC |

|          |          |          |       |       |          |     |
|----------|----------|----------|-------|-------|----------|-----|
| RPL26    | 9.41E-08 | 0.443845 | 1     | 0.999 | 0.001713 | VEC |
| SOD3     | 9.69E-08 | 0.855742 | 0.688 | 0.288 | 0.001765 | VEC |
| MYL9     | 9.89E-08 | 1.088633 | 0.344 | 0.088 | 0.001801 | VEC |
| ZNF503   | 1.14E-07 | 0.908258 | 0.5   | 0.205 | 0.002082 | VEC |
| RASD1    | 1.22E-07 | 1.20481  | 0.719 | 0.443 | 0.002224 | VEC |
| C6orf48  | 1.44E-07 | 0.610889 | 0.875 | 0.651 | 0.00263  | VEC |
| RPS9     | 1.49E-07 | 0.43349  | 1     | 0.998 | 0.002705 | VEC |
| APOD     | 1.49E-07 | 1.166726 | 0.844 | 0.651 | 0.002718 | VEC |
| LY6E     | 1.62E-07 | 0.824745 | 0.844 | 0.543 | 0.002946 | VEC |
| SNHG5    | 1.63E-07 | 0.648012 | 0.969 | 0.918 | 0.002961 | VEC |
| RPL39    | 1.69E-07 | 0.333282 | 1     | 0.999 | 0.003078 | VEC |
| TIMP1    | 1.70E-07 | 0.724046 | 0.875 | 0.641 | 0.003087 | VEC |
| SMCR7L   | 1.73E-07 | 0.355001 | 0.281 | 0.063 | 0.003152 | VEC |
| SLC9A3R2 | 2.00E-07 | 0.473452 | 0.312 | 0.08  | 0.003643 | VEC |
| FN1      | 2.07E-07 | 0.287007 | 0.281 | 0.06  | 0.003774 | VEC |
| FXYS5    | 2.17E-07 | 0.517071 | 0.469 | 0.156 | 0.003948 | VEC |
| HLA-DPA1 | 2.29E-07 | 0.814971 | 0.344 | 0.097 | 0.004176 | VEC |
| SGCB     | 2.31E-07 | 0.535287 | 0.344 | 0.097 | 0.004215 | VEC |
| CCNI     | 2.41E-07 | 0.797289 | 0.781 | 0.541 | 0.004396 | VEC |
| IL11RA   | 2.65E-07 | 0.481283 | 0.281 | 0.067 | 0.004831 | VEC |
| SRRM2    | 3.83E-07 | 0.520352 | 0.781 | 0.505 | 0.00698  | VEC |
| RPL34    | 4.17E-07 | 0.453079 | 1     | 1     | 0.007592 | VEC |
| RCN1     | 5.28E-07 | 0.632679 | 0.688 | 0.408 | 0.009608 | VEC |
| PTN      | 5.34E-07 | 0.815092 | 0.344 | 0.095 | 0.009718 | VEC |
| AKR1C3   | 5.39E-07 | 0.554526 | 0.375 | 0.117 | 0.009818 | VEC |
| VASN     | 5.47E-07 | 0.656457 | 0.344 | 0.101 | 0.009958 | VEC |
| RPS13    | 5.54E-07 | 0.34517  | 1     | 0.998 | 0.010088 | VEC |
| LUZP1    | 6.38E-07 | 0.672564 | 0.562 | 0.271 | 0.011623 | VEC |
| PFKFB3   | 6.80E-07 | 0.516268 | 0.375 | 0.112 | 0.012381 | VEC |
| CXCL1    | 6.91E-07 | 1.305441 | 0.406 | 0.133 | 0.012588 | VEC |
| BC016015 | 7.25E-07 | 1.060143 | 0.375 | 0.122 | 0.013206 | VEC |
| SORBS3   | 8.71E-07 | 0.592232 | 0.5   | 0.208 | 0.015853 | VEC |
| TSPAN4   | 9.11E-07 | 0.668983 | 0.562 | 0.255 | 0.016594 | VEC |
| RPL31    | 9.21E-07 | 0.466725 | 1     | 0.998 | 0.016769 | VEC |
| GNB2L1   | 1.01E-06 | 0.466995 | 1     | 0.99  | 0.01836  | VEC |
| OLFML3   | 1.05E-06 | 0.576306 | 0.5   | 0.166 | 0.019169 | VEC |
| AKAP13   | 1.14E-06 | 0.559001 | 0.469 | 0.179 | 0.020757 | VEC |
| RRAS     | 1.27E-06 | 0.374201 | 0.312 | 0.087 | 0.023153 | VEC |
| CAV1     | 1.32E-06 | 0.817045 | 0.562 | 0.264 | 0.024096 | VEC |
| PLIN2    | 1.41E-06 | 0.908344 | 0.406 | 0.148 | 0.025651 | VEC |
| RPL11    | 1.45E-06 | 0.391108 | 1     | 0.999 | 0.026426 | VEC |
| CMTM3    | 1.70E-06 | 0.4185   | 0.312 | 0.088 | 0.03101  | VEC |
| PPP1R18  | 2.00E-06 | 0.537925 | 0.406 | 0.146 | 0.036437 | VEC |
| PHLDA1   | 2.02E-06 | 0.824885 | 0.5   | 0.206 | 0.036717 | VEC |
| CXCL2    | 2.05E-06 | 1.287979 | 0.531 | 0.234 | 0.037323 | VEC |
| MYLIP    | 2.34E-06 | 0.699014 | 0.625 | 0.352 | 0.042596 | VEC |
| TMEM173  | 2.61E-06 | 0.573013 | 0.375 | 0.131 | 0.047438 | VEC |
| JUN      | 2.73E-06 | 0.776844 | 1     | 0.979 | 0.049755 | VEC |

|           |          |          |       |       |          |     |
|-----------|----------|----------|-------|-------|----------|-----|
| FKBP10    | 2.75E-06 | 0.508345 | 0.312 | 0.093 | 0.050126 | VEC |
| RPS5      | 2.79E-06 | 0.428766 | 1     | 0.99  | 0.050766 | VEC |
| GAS5      | 3.07E-06 | 0.579702 | 0.969 | 0.934 | 0.055979 | VEC |
| RPL10A    | 3.34E-06 | 0.393491 | 1     | 0.995 | 0.060836 | VEC |
| ID2       | 3.50E-06 | 1.230132 | 0.781 | 0.559 | 0.063652 | VEC |
| FOXO3     | 4.05E-06 | 0.467463 | 0.406 | 0.147 | 0.073707 | VEC |
| RPS8      | 4.44E-06 | 0.459654 | 1     | 0.999 | 0.080819 | VEC |
| PRKCDBP   | 5.36E-06 | 0.601718 | 0.562 | 0.26  | 0.09762  | VEC |
| RPS4X     | 5.48E-06 | 0.423624 | 1     | 0.999 | 0.099774 | VEC |
| MXRA8     | 5.60E-06 | 0.416219 | 0.344 | 0.105 | 0.101904 | VEC |
| C11orf96  | 6.25E-06 | 0.564811 | 0.281 | 0.077 | 0.113809 | VEC |
| NME4      | 6.90E-06 | 0.484234 | 0.438 | 0.174 | 0.125673 | VEC |
| CYB5R3    | 7.03E-06 | 0.748436 | 0.625 | 0.423 | 0.128087 | VEC |
| RPS18     | 7.10E-06 | 0.450356 | 1     | 1     | 0.12923  | VEC |
| PTRF      | 7.48E-06 | 0.655925 | 0.719 | 0.455 | 0.136243 | VEC |
| HLA-E     | 7.66E-06 | 0.914415 | 0.906 | 0.885 | 0.139413 | VEC |
| C16orf45  | 8.02E-06 | 0.439484 | 0.344 | 0.111 | 0.146112 | VEC |
| FSTL1     | 8.10E-06 | 0.536015 | 0.375 | 0.132 | 0.14741  | VEC |
| SDCBP     | 9.48E-06 | 0.615684 | 0.75  | 0.565 | 0.17261  | VEC |
| RPL29     | 9.81E-06 | 0.445861 | 1     | 0.993 | 0.178612 | VEC |
| FMOD      | 9.91E-06 | 0.60772  | 0.406 | 0.141 | 0.180403 | VEC |
| RPS19     | 1.00E-05 | 0.4873   | 1     | 0.998 | 0.182763 | VEC |
| MAP1LC3A  | 1.05E-05 | 0.531172 | 0.469 | 0.201 | 0.190653 | VEC |
| RPS25     | 1.12E-05 | 0.354671 | 1     | 0.999 | 0.203285 | VEC |
| PTMS      | 1.12E-05 | 0.614203 | 0.719 | 0.542 | 0.203549 | VEC |
| SVIL      | 1.15E-05 | 0.646482 | 0.562 | 0.284 | 0.208889 | VEC |
| EPHX1     | 1.23E-05 | 0.666092 | 0.719 | 0.495 | 0.22472  | VEC |
| SDC2      | 1.32E-05 | 0.347491 | 0.5   | 0.172 | 0.239668 | VEC |
| RPL21     | 1.37E-05 | 0.32575  | 1     | 0.999 | 0.248622 | VEC |
| WTAP      | 1.81E-05 | 0.664576 | 0.625 | 0.391 | 0.328855 | VEC |
| FCGRT     | 2.00E-05 | 1.004049 | 0.531 | 0.311 | 0.363482 | VEC |
| PPP1R15A  | 2.41E-05 | 0.642217 | 0.969 | 0.917 | 0.438903 | VEC |
| RPL18A    | 2.46E-05 | 0.393056 | 0.969 | 0.997 | 0.447431 | VEC |
| PCBP2     | 2.58E-05 | 0.39512  | 0.875 | 0.816 | 0.469526 | VEC |
| RSL1D1    | 2.93E-05 | 0.577825 | 0.812 | 0.688 | 0.533379 | VEC |
| RPL5      | 2.97E-05 | 0.476102 | 1     | 0.993 | 0.540511 | VEC |
| BGN       | 3.07E-05 | 0.901138 | 0.469 | 0.237 | 0.558147 | VEC |
| SON       | 3.12E-05 | 0.502922 | 0.781 | 0.69  | 0.567742 | VEC |
| TMEM98    | 3.22E-05 | 0.506215 | 0.406 | 0.168 | 0.586025 | VEC |
| QKI       | 3.25E-05 | 0.324836 | 0.344 | 0.12  | 0.590915 | VEC |
| FRMD6     | 3.38E-05 | 0.416412 | 0.375 | 0.148 | 0.615047 | VEC |
| LOC541471 | 3.60E-05 | 0.542192 | 0.406 | 0.167 | 0.655351 | VEC |
| MT1M      | 3.68E-05 | 0.792443 | 0.469 | 0.218 | 0.670942 | VEC |
| MSS51     | 4.17E-05 | 0.384494 | 1     | 0.979 | 0.758884 | VEC |
| RPS3A     | 4.19E-05 | 0.333525 | 1     | 0.998 | 0.762356 | VEC |
| RPL41     | 4.22E-05 | 0.277246 | 1     | 1     | 0.768971 | VEC |
| RPL36A    | 4.30E-05 | 0.503123 | 1     | 0.989 | 0.782482 | VEC |
| NFKBIA    | 4.75E-05 | 0.950246 | 0.938 | 0.943 | 0.864178 | VEC |



|              |          |          |       |       |          |     |
|--------------|----------|----------|-------|-------|----------|-----|
| PKIG         | 4.82E-05 | 0.386976 | 0.406 | 0.176 | 0.876892 | VEC |
| GBP2         | 4.82E-05 | 0.376338 | 0.281 | 0.089 | 0.878438 | VEC |
| LAPTM4A      | 4.84E-05 | 0.591425 | 1     | 0.971 | 0.880597 | VEC |
| TRAM1        | 4.92E-05 | 0.519379 | 0.656 | 0.442 | 0.896031 | VEC |
| RPS11        | 5.36E-05 | 0.354765 | 0.969 | 0.985 | 0.976841 | VEC |
| CXCL3        | 5.92E-05 | 0.848192 | 0.281 | 0.087 | 1        | VEC |
| RPL15        | 6.92E-05 | 0.287693 | 1     | 0.999 | 1        | VEC |
| CD320        | 6.99E-05 | 0.398903 | 0.281 | 0.089 | 1        | VEC |
| KIAA0930     | 7.26E-05 | 0.410977 | 0.281 | 0.092 | 1        | VEC |
| COTL1        | 7.38E-05 | 0.605997 | 0.312 | 0.114 | 1        | VEC |
| APCDD1       | 7.42E-05 | 0.500362 | 0.281 | 0.09  | 1        | VEC |
| GLTSCR2      | 9.80E-05 | 0.677037 | 0.844 | 0.828 | 1        | VEC |
| CCDC85B      | 0.000102 | 0.551197 | 0.688 | 0.551 | 1        | VEC |
| DAD1         | 0.000104 | 0.368883 | 0.875 | 0.839 | 1        | VEC |
| RPL36        | 0.000106 | 0.419468 | 1     | 0.997 | 1        | VEC |
| RTN4         | 0.000107 | 0.451948 | 0.844 | 0.896 | 1        | VEC |
| ARRDC3       | 0.000112 | 0.593578 | 0.531 | 0.288 | 1        | VEC |
| RPL18        | 0.000127 | 0.272131 | 1     | 0.996 | 1        | VEC |
| PPIC         | 0.000128 | 0.520573 | 0.531 | 0.312 | 1        | VEC |
| SASH1        | 0.000129 | 0.278034 | 0.375 | 0.145 | 1        | VEC |
| SERPINB6     | 0.000139 | 0.513111 | 0.5   | 0.268 | 1        | VEC |
| BRD2         | 0.000151 | 0.385824 | 0.75  | 0.596 | 1        | VEC |
| SSB          | 0.000177 | 0.332223 | 0.875 | 0.727 | 1        | VEC |
| ZNF22        | 0.000179 | 0.379952 | 0.281 | 0.1   | 1        | VEC |
| SERPINF1     | 0.000182 | 0.879366 | 0.688 | 0.525 | 1        | VEC |
| RIF1         | 0.00019  | 0.344434 | 0.281 | 0.098 | 1        | VEC |
| CYBRD1       | 0.000223 | 0.455615 | 0.562 | 0.311 | 1        | VEC |
| RPS15A       | 0.000227 | 0.355796 | 1     | 0.997 | 1        | VEC |
| FKBP7        | 0.00023  | 0.320071 | 0.312 | 0.116 | 1        | VEC |
| ID3          | 0.000237 | 0.666499 | 0.844 | 0.76  | 1        | VEC |
| GSTM3        | 0.000249 | 0.58223  | 0.469 | 0.231 | 1        | VEC |
| IFRD1        | 0.000266 | 0.538686 | 0.594 | 0.411 | 1        | VEC |
| FTL          | 0.000267 | 0.436293 | 1     | 0.996 | 1        | VEC |
| HLA-B        | 0.000283 | 0.642649 | 0.938 | 0.925 | 1        | VEC |
| CD276        | 0.000294 | 0.289364 | 0.312 | 0.119 | 1        | VEC |
| RPL35        | 0.00032  | 0.285442 | 1     | 0.999 | 1        | VEC |
| AXL          | 0.000339 | 0.364259 | 0.344 | 0.131 | 1        | VEC |
| UBC          | 0.00035  | 0.355181 | 0.969 | 0.999 | 1        | VEC |
| CTSZ         | 0.000365 | 0.308019 | 0.344 | 0.138 | 1        | VEC |
| SPARC        | 0.000379 | 0.584568 | 0.719 | 0.453 | 1        | VEC |
| COL6A3       | 0.000391 | 0.556093 | 0.344 | 0.139 | 1        | VEC |
| NMB          | 0.000398 | 0.320588 | 0.281 | 0.104 | 1        | VEC |
| LOC100996255 | 0.000417 | 0.313622 | 0.438 | 0.218 | 1        | VEC |
| KLF6         | 0.000472 | 0.77616  | 0.75  | 0.677 | 1        | VEC |
| TPM4         | 0.000486 | 0.648394 | 0.625 | 0.492 | 1        | VEC |
| LOC654342    | 0.00049  | 0.835155 | 0.406 | 0.226 | 1        | VEC |
| EFHD1        | 0.000515 | 0.31759  | 0.312 | 0.114 | 1        | VEC |
| RPS17L       | 0.000557 | 0.306788 | 1     | 0.996 | 1        | VEC |

|         |          |          |       |       |       |
|---------|----------|----------|-------|-------|-------|
| RPL7A   | 0.000558 | 0.333234 | 1     | 0.987 | 1 VEC |
| PFDN5   | 0.000584 | 0.386052 | 0.969 | 0.974 | 1 VEC |
| EEF1G   | 0.000603 | 0.272563 | 1     | 0.988 | 1 VEC |
| ZBTB20  | 0.000622 | 0.364761 | 0.344 | 0.152 | 1 VEC |
| NAMPT   | 0.000641 | 0.690142 | 0.531 | 0.395 | 1 VEC |
| NAP1L1  | 0.000651 | 0.491124 | 0.781 | 0.736 | 1 VEC |
| LMNA    | 0.000665 | 0.378313 | 0.938 | 0.967 | 1 VEC |
| EIF3E   | 0.000675 | 0.397769 | 0.844 | 0.822 | 1 VEC |
| MAFF    | 0.000679 | 0.594106 | 0.625 | 0.439 | 1 VEC |
| MYC     | 0.000719 | 0.643836 | 0.719 | 0.566 | 1 VEC |
| LOX     | 0.000724 | 0.305831 | 0.375 | 0.157 | 1 VEC |
| AMOTL2  | 0.000735 | 0.32164  | 0.312 | 0.129 | 1 VEC |
| RPL28   | 0.000744 | 0.322822 | 1     | 0.992 | 1 VEC |
| CD59    | 0.00075  | 0.568355 | 0.812 | 0.734 | 1 VEC |
| TMEM204 | 0.000776 | 0.301362 | 0.375 | 0.156 | 1 VEC |
| EHD2    | 0.000781 | 0.366505 | 0.344 | 0.155 | 1 VEC |
| SSPN    | 0.000797 | 0.499049 | 0.406 | 0.214 | 1 VEC |
| RGS3    | 0.000809 | 0.315745 | 0.281 | 0.108 | 1 VEC |
| RPS14   | 0.000836 | 0.296041 | 1     | 1     | 1 VEC |
| CANX    | 0.000847 | 0.370521 | 0.719 | 0.608 | 1 VEC |
| OAZ2    | 0.000855 | 0.430738 | 0.594 | 0.444 | 1 VEC |
| LGMN    | 0.000877 | 0.445365 | 0.469 | 0.277 | 1 VEC |
| NFIC    | 0.000929 | 0.584326 | 0.562 | 0.402 | 1 VEC |
| JAM3    | 0.000985 | 0.474301 | 0.312 | 0.132 | 1 VEC |
| RPLP2   | 0.001014 | 0.259422 | 1     | 0.999 | 1 VEC |
| RPL38   | 0.001021 | 0.343315 | 1     | 0.989 | 1 VEC |
| JMJD1C  | 0.001048 | 0.532377 | 0.469 | 0.272 | 1 VEC |
| OSBPL8  | 0.001049 | 0.566168 | 0.344 | 0.169 | 1 VEC |
| HIAT1   | 0.001057 | 0.40693  | 0.406 | 0.224 | 1 VEC |
| SLC39A1 | 0.001061 | 0.433079 | 0.656 | 0.544 | 1 VEC |
| NR4A2   | 0.001087 | 0.765846 | 0.375 | 0.201 | 1 VEC |
| FSCN1   | 0.001143 | 0.557287 | 0.438 | 0.246 | 1 VEC |
| SEC62   | 0.001158 | 0.298171 | 0.875 | 0.845 | 1 VEC |
| FBLN2   | 0.001205 | 0.484678 | 0.312 | 0.138 | 1 VEC |
| ETS2    | 0.001233 | 0.688329 | 0.531 | 0.358 | 1 VEC |
| ZFAND5  | 0.0013   | 0.591532 | 0.75  | 0.664 | 1 VEC |
| EVA1C   | 0.001304 | 0.514974 | 0.344 | 0.168 | 1 VEC |
| PCOLCE  | 0.001348 | 0.547098 | 0.312 | 0.137 | 1 VEC |
| CAT     | 0.001363 | 0.488925 | 0.438 | 0.27  | 1 VEC |
| ZFAS1   | 0.001363 | 0.520864 | 0.906 | 0.867 | 1 VEC |
| TXLNG   | 0.001376 | 0.43797  | 0.312 | 0.146 | 1 VEC |
| RPS14P3 | 0.001387 | 0.32601  | 0.969 | 0.962 | 1 VEC |
| SMIM3   | 0.001435 | 0.397695 | 0.375 | 0.185 | 1 VEC |
| FBLN1   | 0.001448 | 1.356966 | 0.438 | 0.295 | 1 VEC |
| EHD4    | 0.001491 | 0.379164 | 0.312 | 0.144 | 1 VEC |
| LSM14A  | 0.001494 | 0.315061 | 0.625 | 0.497 | 1 VEC |
| GADD45A | 0.001525 | 0.440087 | 0.719 | 0.601 | 1 VEC |
| TMEM45A | 0.001532 | 0.497917 | 0.344 | 0.164 | 1 VEC |

|           |          |          |       |       |       |
|-----------|----------|----------|-------|-------|-------|
| BIN3      | 0.001545 | 0.304057 | 0.281 | 0.118 | 1 VEC |
| RPSA      | 0.001548 | 0.345005 | 0.875 | 0.871 | 1 VEC |
| SNX9      | 0.001643 | 0.394421 | 0.375 | 0.2   | 1 VEC |
| KMT2E     | 0.00165  | 0.599546 | 0.656 | 0.588 | 1 VEC |
| EIF4A2    | 0.001671 | 0.483774 | 0.906 | 0.903 | 1 VEC |
| RAB32     | 0.001698 | 0.441758 | 0.344 | 0.161 | 1 VEC |
| TFAP2B    | 0.00173  | 0.445362 | 0.312 | 0.13  | 1 VEC |
| LINC00152 | 0.001763 | 0.299082 | 0.281 | 0.113 | 1 VEC |
| MTDH      | 0.001799 | 0.385843 | 0.688 | 0.574 | 1 VEC |
| SNHG6     | 0.001866 | 0.332172 | 0.875 | 0.76  | 1 VEC |
| KLF9      | 0.001944 | 0.557978 | 0.406 | 0.242 | 1 VEC |
| HLA-F     | 0.001989 | 0.3071   | 0.281 | 0.12  | 1 VEC |
| ZFP36L1   | 0.002022 | 0.399196 | 0.938 | 0.847 | 1 VEC |
| RBM8A     | 0.002025 | 0.33133  | 0.812 | 0.806 | 1 VEC |
| HEXA      | 0.002048 | 0.478644 | 0.469 | 0.293 | 1 VEC |
| QSOX1     | 0.002064 | 0.255936 | 0.312 | 0.134 | 1 VEC |
| NFIB      | 0.002304 | 0.33367  | 0.344 | 0.167 | 1 VEC |
| ERGIC3    | 0.00233  | 0.35718  | 0.688 | 0.66  | 1 VEC |
| TNPO1     | 0.002335 | 0.435508 | 0.344 | 0.171 | 1 VEC |
| XRN1      | 0.002492 | 0.280667 | 0.281 | 0.127 | 1 VEC |
| TTC28     | 0.002518 | 0.370367 | 0.406 | 0.228 | 1 VEC |
| MBNL1     | 0.002533 | 0.286012 | 0.312 | 0.142 | 1 VEC |
| NR2F2     | 0.002583 | 0.6436   | 0.312 | 0.152 | 1 VEC |
| PLTP      | 0.002605 | 0.508456 | 0.281 | 0.128 | 1 VEC |
| SEC11A    | 0.002621 | 0.382618 | 0.719 | 0.713 | 1 VEC |
| MGLL      | 0.002673 | 0.343393 | 0.281 | 0.12  | 1 VEC |
| NASP      | 0.002701 | 0.374069 | 0.531 | 0.373 | 1 VEC |
| BACE2     | 0.002729 | 0.350568 | 0.281 | 0.126 | 1 VEC |
| PDLIM2    | 0.002788 | 0.381292 | 0.375 | 0.202 | 1 VEC |
| SPAG9     | 0.003005 | 0.291415 | 0.344 | 0.174 | 1 VEC |
| VMP1      | 0.00303  | 0.332479 | 0.531 | 0.384 | 1 VEC |
| RPL24     | 0.003063 | 0.250742 | 1     | 0.994 | 1 VEC |
| APP       | 0.003116 | 0.655829 | 0.656 | 0.567 | 1 VEC |
| UBE2J1    | 0.003267 | 0.43008  | 0.438 | 0.278 | 1 VEC |
| TLE4      | 0.003334 | 0.479673 | 0.375 | 0.224 | 1 VEC |
| EMP3      | 0.003395 | 0.541149 | 0.469 | 0.28  | 1 VEC |
| TMSB10    | 0.003639 | 0.549808 | 1     | 0.997 | 1 VEC |
| PRSS23    | 0.003741 | 0.587835 | 0.406 | 0.227 | 1 VEC |
| RGS2      | 0.003769 | 0.472164 | 0.438 | 0.279 | 1 VEC |
| CHD1      | 0.003836 | 0.359092 | 0.344 | 0.189 | 1 VEC |
| HSP90B1   | 0.00384  | 0.39092  | 0.844 | 0.824 | 1 VEC |
| FAM195B   | 0.003911 | 0.302802 | 0.312 | 0.155 | 1 VEC |
| RPLP0     | 0.00404  | 0.290404 | 1     | 0.992 | 1 VEC |
| DUSP6     | 0.004295 | 0.508888 | 0.375 | 0.209 | 1 VEC |
| SRSF11    | 0.004307 | 0.377177 | 0.812 | 0.757 | 1 VEC |
| ITGB1BP1  | 0.004335 | 0.459389 | 0.531 | 0.417 | 1 VEC |
| IFT57     | 0.004413 | 0.402269 | 0.469 | 0.326 | 1 VEC |
| DDIT4     | 0.004591 | 0.632211 | 0.625 | 0.463 | 1 VEC |

|          |          |          |       |       |   |      |
|----------|----------|----------|-------|-------|---|------|
| MFGE8    | 0.00461  | 0.680452 | 0.469 | 0.325 | 1 | VEC  |
| RPL37    | 0.004621 | 0.272302 | 1     | 0.995 | 1 | VEC  |
| L32131   | 0.004833 | 0.429417 | 0.719 | 0.745 | 1 | VEC  |
| MAD2L2   | 0.005592 | 0.305891 | 0.312 | 0.158 | 1 | VEC  |
| SSBP4    | 0.005618 | 0.251888 | 0.312 | 0.15  | 1 | VEC  |
| RBM27    | 0.005672 | 0.372813 | 0.438 | 0.271 | 1 | VEC  |
| PGRMC1   | 0.005734 | 0.399081 | 0.719 | 0.646 | 1 | VEC  |
| RPS27L   | 0.005906 | 0.423519 | 0.812 | 0.846 | 1 | VEC  |
| PLSCR1   | 0.006064 | 0.342559 | 0.375 | 0.21  | 1 | VEC  |
| EID1     | 0.006402 | 0.380988 | 0.812 | 0.884 | 1 | VEC  |
| HSF1     | 0.006622 | 0.359481 | 0.406 | 0.262 | 1 | VEC  |
| UBXN4    | 0.006628 | 0.350909 | 0.719 | 0.689 | 1 | VEC  |
| CERS2    | 0.006731 | 0.372689 | 0.406 | 0.253 | 1 | VEC  |
| MAPK3    | 0.006878 | 0.389695 | 0.344 | 0.19  | 1 | VEC  |
| SEC22C   | 0.006936 | 0.398282 | 0.312 | 0.164 | 1 | VEC  |
| RPL9     | 0.006986 | 0.411114 | 0.75  | 0.787 | 1 | VEC  |
| WWTR1    | 0.007092 | 0.267379 | 0.281 | 0.138 | 1 | VEC  |
| C5orf24  | 0.007116 | 0.402466 | 0.312 | 0.176 | 1 | VEC  |
| IRF1     | 0.007288 | 0.614539 | 0.5   | 0.378 | 1 | VEC  |
| MPHOSPH8 | 0.007457 | 0.386169 | 0.562 | 0.483 | 1 | VEC  |
| H1FX     | 0.007572 | 0.555851 | 0.531 | 0.422 | 1 | VEC  |
| SOX4     | 0.007828 | 0.453007 | 0.531 | 0.382 | 1 | VEC  |
| SPTBN1   | 0.008129 | 0.430078 | 0.344 | 0.198 | 1 | VEC  |
| NR3C1    | 0.008206 | 0.322365 | 0.312 | 0.164 | 1 | VEC  |
| IPO7     | 0.008231 | 0.299284 | 0.312 | 0.156 | 1 | VEC  |
| XAB2     | 0.008326 | 0.286093 | 0.281 | 0.139 | 1 | VEC  |
| SEPT2    | 0.008328 | 0.28062  | 0.625 | 0.504 | 1 | VEC  |
| BCAR1    | 0.00836  | 0.275433 | 0.312 | 0.167 | 1 | VEC  |
| SMC4     | 0.008481 | 0.293813 | 0.281 | 0.143 | 1 | VEC  |
| CTSH     | 0.008577 | 0.463383 | 0.406 | 0.267 | 1 | VEC  |
| LSP1     | 0.008629 | 0.459672 | 0.5   | 0.329 | 1 | VEC  |
| C19orf10 | 0.008722 | 0.361949 | 0.656 | 0.597 | 1 | VEC  |
| TJP1     | 0.008902 | 0.303865 | 0.312 | 0.173 | 1 | VEC  |
| WASF2    | 0.009575 | 0.341862 | 0.531 | 0.376 | 1 | VEC  |
| RPS10    | 0.009656 | 0.302078 | 0.875 | 0.979 | 1 | VEC  |
| PSIP1    | 0.009766 | 0.363279 | 0.406 | 0.261 | 1 | VEC  |
| NUCKS1   | 0.009826 | 0.31243  | 0.75  | 0.774 | 1 | VEC  |
| C19orf66 | 0.009955 | 0.352323 | 0.375 | 0.247 | 1 | VEC  |
| CA3      | 0        | 4.088734 | 1     | 0.01  | 0 | CenC |
| FGF7     | 0        | 2.208004 | 1     | 0.009 | 0 | CenC |
| MSMP     | 0        | 2.17086  | 0.964 | 0.002 | 0 | CenC |
| TMEM178A | 0        | 1.546879 | 0.857 | 0.002 | 0 | CenC |
| EDN3     | 0        | 1.530471 | 0.857 | 0.006 | 0 | CenC |
| AGXT2L1  | 0        | 1.168631 | 0.714 | 0     | 0 | CenC |
| PVALB    | 0        | 1.104873 | 0.607 | 0     | 0 | CenC |
| FGF9     | 0        | 0.926191 | 0.679 | 0.007 | 0 | CenC |
| STC1     | 0        | 0.839382 | 0.5   | 0.004 | 0 | CenC |
| KISS1    | 0        | 0.696484 | 0.5   | 0.001 | 0 | CenC |

|           |           |          |       |       |           |      |
|-----------|-----------|----------|-------|-------|-----------|------|
| NELL2     | 0         | 0.56955  | 0.536 | 0.002 | 0         | CenC |
| SHC4      | 0         | 0.562504 | 0.464 | 0.001 | 0         | CenC |
| CDH2      | 0         | 0.54296  | 0.536 | 0.001 | 0         | CenC |
| NOG       | 0         | 0.500715 | 0.5   | 0.004 | 0         | CenC |
| CRABP1    | 0         | 0.480106 | 0.286 | 0.001 | 0         | CenC |
| PLK5      | 0         | 0.476208 | 0.393 | 0.001 | 0         | CenC |
| CHGB      | 0         | 0.459093 | 0.357 | 0.001 | 0         | CenC |
| CEND1     | 0         | 0.392736 | 0.357 | 0.001 | 0         | CenC |
| ADCYAP1R1 | 0         | 0.386844 | 0.321 | 0     | 0         | CenC |
| RGS7BP    | 0         | 0.386464 | 0.357 | 0     | 0         | CenC |
| GAL3ST3   | 0         | 0.355975 | 0.393 | 0     | 0         | CenC |
| LRRN1     | 0         | 0.332713 | 0.357 | 0.001 | 0         | CenC |
| RALYL     | 0         | 0.325445 | 0.357 | 0.001 | 0         | CenC |
| POU6F2    | 0         | 0.314586 | 0.393 | 0     | 0         | CenC |
| PIP5K1B   | 5.59E-297 | 1.085468 | 0.929 | 0.016 | 1.02E-292 | CenC |
| MT3       | 5.43E-283 | 0.295369 | 0.321 | 0.002 | 9.89E-279 | CenC |
| FZD2      | 1.31E-269 | 0.554403 | 0.429 | 0.003 | 2.38E-265 | CenC |
| MIA       | 2.22E-234 | 0.714153 | 0.536 | 0.006 | 4.04E-230 | CenC |
| A2M       | 1.64E-219 | 0.595615 | 0.357 | 0.003 | 2.98E-215 | CenC |
| SLC4A4    | 4.09E-201 | 1.311377 | 0.964 | 0.027 | 7.44E-197 | CenC |
| RGS5      | 1.28E-188 | 2.898271 | 1     | 0.032 | 2.33E-184 | CenC |
| PAPPA     | 1.45E-188 | 0.959591 | 0.714 | 0.015 | 2.64E-184 | CenC |
| CLRN1     | 7.57E-187 | 0.286226 | 0.286 | 0.002 | 1.38E-182 | CenC |
| XAGE2     | 1.35E-186 | 0.522936 | 0.5   | 0.007 | 2.47E-182 | CenC |
| ITM2C     | 2.17E-183 | 1.942354 | 1     | 0.033 | 3.96E-179 | CenC |
| PCDH7     | 1.05E-179 | 1.264456 | 0.964 | 0.03  | 1.91E-175 | CenC |
| GNG4      | 3.44E-179 | 0.368089 | 0.286 | 0.002 | 6.26E-175 | CenC |
| CDO1      | 3.13E-178 | 0.408799 | 0.321 | 0.003 | 5.69E-174 | CenC |
| CLDN10    | 3.43E-174 | 0.511808 | 0.429 | 0.006 | 6.25E-170 | CenC |
| ASGR1     | 2.29E-168 | 0.454471 | 0.5   | 0.008 | 4.16E-164 | CenC |
| OGDHL     | 4.58E-166 | 0.304486 | 0.393 | 0.005 | 8.33E-162 | CenC |
| TNNC1     | 2.13E-159 | 2.05545  | 0.964 | 0.035 | 3.88E-155 | CenC |
| PLCE1     | 3.36E-156 | 0.307445 | 0.321 | 0.003 | 6.11E-152 | CenC |
| MICAL2    | 7.18E-152 | 0.612416 | 0.714 | 0.019 | 1.31E-147 | CenC |
| FAM181B   | 1.34E-151 | 0.463269 | 0.429 | 0.007 | 2.44E-147 | CenC |
| ANK1      | 2.66E-149 | 0.391492 | 0.429 | 0.007 | 4.84E-145 | CenC |
| PLCE1-AS1 | 1.94E-147 | 0.461626 | 0.321 | 0.004 | 3.52E-143 | CenC |
| AJAP1     | 3.16E-147 | 0.259474 | 0.321 | 0.004 | 5.76E-143 | CenC |
| LIF       | 2.94E-145 | 0.376801 | 0.321 | 0.004 | 5.36E-141 | CenC |
| HAGHL     | 3.41E-144 | 0.494847 | 0.5   | 0.01  | 6.21E-140 | CenC |
| DAAM2     | 3.02E-138 | 0.276282 | 0.286 | 0.003 | 5.50E-134 | CenC |
| TMOD1     | 7.30E-137 | 0.417356 | 0.464 | 0.009 | 1.33E-132 | CenC |
| CYP1A2    | 1.12E-132 | 0.370284 | 0.393 | 0.006 | 2.04E-128 | CenC |
| LINC00839 | 7.16E-127 | 0.278985 | 0.357 | 0.005 | 1.30E-122 | CenC |
| NECAB1    | 2.46E-120 | 0.604678 | 0.607 | 0.017 | 4.48E-116 | CenC |
| SFRP1     | 2.17E-109 | 2.092107 | 1     | 0.058 | 3.95E-105 | CenC |
| COL4A3    | 1.48E-108 | 1.193394 | 0.929 | 0.048 | 2.69E-104 | CenC |
| SH3BP4    | 2.36E-103 | 0.673261 | 0.643 | 0.023 | 4.29E-99  | CenC |

|           |           |          |       |       |          |      |
|-----------|-----------|----------|-------|-------|----------|------|
| MAOB      | 2.60E-102 | 0.381671 | 0.321 | 0.006 | 4.74E-98 | CenC |
| SALL2     | 4.94E-100 | 0.293023 | 0.286 | 0.004 | 9.00E-96 | CenC |
| FADS2     | 3.10E-94  | 0.747714 | 0.643 | 0.025 | 5.64E-90 | CenC |
| NTN1      | 5.32E-94  | 0.660501 | 0.786 | 0.038 | 9.68E-90 | CenC |
| APOE      | 6.67E-94  | 1.273927 | 0.929 | 0.055 | 1.22E-89 | CenC |
| PIFO      | 7.06E-94  | 0.4231   | 0.429 | 0.011 | 1.29E-89 | CenC |
| SOBP      | 2.20E-93  | 0.398636 | 0.464 | 0.013 | 4.01E-89 | CenC |
| CCDC144CP | 1.01E-91  | 0.992844 | 0.643 | 0.026 | 1.84E-87 | CenC |
| COL8A2    | 1.35E-89  | 1.552421 | 0.964 | 0.065 | 2.46E-85 | CenC |
| NRXN3     | 1.16E-87  | 0.261978 | 0.286 | 0.005 | 2.11E-83 | CenC |
| ATP1B2    | 1.10E-86  | 0.480283 | 0.393 | 0.01  | 2.00E-82 | CenC |
| SYNPO     | 8.45E-84  | 0.279019 | 0.393 | 0.01  | 1.54E-79 | CenC |
| ENO2      | 7.78E-82  | 1.068262 | 0.75  | 0.041 | 1.42E-77 | CenC |
| SCD       | 5.55E-80  | 1.960239 | 0.929 | 0.07  | 1.01E-75 | CenC |
| MARCH3    | 3.12E-75  | 0.613432 | 0.571 | 0.025 | 5.68E-71 | CenC |
| TPM2      | 2.15E-74  | 1.075244 | 0.857 | 0.06  | 3.92E-70 | CenC |
| DNAJC6    | 4.91E-72  | 0.33579  | 0.393 | 0.012 | 8.95E-68 | CenC |
| FGF11     | 9.22E-71  | 0.263127 | 0.321 | 0.008 | 1.68E-66 | CenC |
| TGFBR3    | 1.22E-69  | 0.944784 | 0.821 | 0.058 | 2.23E-65 | CenC |
| LOC339535 | 5.41E-68  | 0.605936 | 0.536 | 0.024 | 9.86E-64 | CenC |
| SLC4A11   | 7.24E-67  | 2.233627 | 1     | 0.102 | 1.32E-62 | CenC |
| RAP1GAP   | 5.82E-66  | 0.515204 | 0.571 | 0.029 | 1.06E-61 | CenC |
| RBP7      | 4.18E-65  | 0.371605 | 0.321 | 0.009 | 7.62E-61 | CenC |
| MRAP2     | 4.40E-64  | 0.252334 | 0.286 | 0.007 | 8.02E-60 | CenC |
| ISYNA1    | 6.65E-64  | 0.874186 | 0.786 | 0.058 | 1.21E-59 | CenC |
| GLIS3     | 1.89E-61  | 0.348963 | 0.321 | 0.01  | 3.44E-57 | CenC |
| MYOC      | 7.08E-60  | 2.836388 | 0.964 | 0.097 | 1.29E-55 | CenC |
| CA12      | 8.74E-58  | 2.022894 | 1     | 0.121 | 1.59E-53 | CenC |
| ALCAM     | 2.21E-57  | 1.3188   | 0.929 | 0.096 | 4.02E-53 | CenC |
| C1QTNF4   | 4.50E-57  | 0.346431 | 0.393 | 0.015 | 8.19E-53 | CenC |
| SULF1     | 3.87E-54  | 0.529506 | 0.536 | 0.03  | 7.04E-50 | CenC |
| RBM38     | 9.07E-54  | 0.422992 | 0.429 | 0.019 | 1.65E-49 | CenC |
| SYMPK     | 1.16E-53  | 1.016179 | 0.821 | 0.077 | 2.12E-49 | CenC |
| TBX2      | 3.30E-53  | 0.506499 | 0.571 | 0.034 | 6.02E-49 | CenC |
| MPP1      | 2.51E-52  | 0.671464 | 0.714 | 0.056 | 4.57E-48 | CenC |
| SYNJ1     | 3.92E-52  | 0.473609 | 0.429 | 0.02  | 7.14E-48 | CenC |
| PROCR     | 7.29E-52  | 0.328429 | 0.357 | 0.014 | 1.33E-47 | CenC |
| COL4A4    | 1.17E-51  | 0.661156 | 0.571 | 0.036 | 2.14E-47 | CenC |
| MGP       | 4.52E-51  | 3.819393 | 1     | 0.142 | 8.22E-47 | CenC |
| PVRL3     | 5.32E-51  | 0.367605 | 0.321 | 0.012 | 9.68E-47 | CenC |
| ZDHHC14   | 1.20E-50  | 0.408057 | 0.393 | 0.017 | 2.18E-46 | CenC |
| RAB17     | 2.55E-50  | 0.835123 | 0.679 | 0.054 | 4.64E-46 | CenC |
| NCAM1     | 5.94E-50  | 0.626639 | 0.643 | 0.046 | 1.08E-45 | CenC |
| PPARGC1B  | 6.50E-48  | 0.387858 | 0.357 | 0.015 | 1.18E-43 | CenC |
| SPAG4     | 3.96E-47  | 0.260633 | 0.286 | 0.01  | 7.21E-43 | CenC |
| PITX2     | 2.00E-45  | 1.249837 | 0.929 | 0.112 | 3.65E-41 | CenC |
| ANXA6     | 2.75E-45  | 0.747299 | 0.607 | 0.046 | 5.01E-41 | CenC |
| TRIB2     | 6.15E-44  | 0.456789 | 0.464 | 0.028 | 1.12E-39 | CenC |

|          |          |          |       |       |          |      |
|----------|----------|----------|-------|-------|----------|------|
| EFCAB4A  | 7.41E-44 | 0.335623 | 0.393 | 0.02  | 1.35E-39 | CenC |
| VEGFA    | 3.97E-43 | 0.86139  | 0.786 | 0.085 | 7.23E-39 | CenC |
| PCDH18   | 6.47E-43 | 0.326561 | 0.321 | 0.014 | 1.18E-38 | CenC |
| LPHN1    | 1.15E-42 | 0.33115  | 0.357 | 0.017 | 2.09E-38 | CenC |
| COL8A1   | 2.12E-42 | 1.281131 | 0.821 | 0.095 | 3.86E-38 | CenC |
| METRN    | 7.26E-42 | 0.300862 | 0.286 | 0.011 | 1.32E-37 | CenC |
| MYH10    | 1.65E-40 | 0.469229 | 0.5   | 0.035 | 3.00E-36 | CenC |
| SEMA3E   | 3.20E-40 | 0.38055  | 0.393 | 0.021 | 5.82E-36 | CenC |
| BMP3     | 5.15E-40 | 0.526958 | 0.571 | 0.046 | 9.37E-36 | CenC |
| OBSL1    | 5.72E-40 | 0.633393 | 0.643 | 0.058 | 1.04E-35 | CenC |
| TFAP2B   | 7.85E-40 | 1.082514 | 0.964 | 0.129 | 1.43E-35 | CenC |
| SLC9A3R2 | 3.26E-39 | 0.597729 | 0.75  | 0.079 | 5.93E-35 | CenC |
| HEG1     | 1.34E-38 | 0.506355 | 0.643 | 0.059 | 2.44E-34 | CenC |
| SORL1    | 1.42E-38 | 0.676482 | 0.643 | 0.061 | 2.58E-34 | CenC |
| TCEAL2   | 2.39E-38 | 0.312274 | 0.357 | 0.019 | 4.34E-34 | CenC |
| SPON1    | 3.34E-38 | 0.549715 | 0.464 | 0.032 | 6.08E-34 | CenC |
| RPRML    | 1.19E-36 | 0.940305 | 0.536 | 0.046 | 2.18E-32 | CenC |
| KDELR3   | 4.34E-36 | 0.602005 | 0.607 | 0.057 | 7.91E-32 | CenC |
| AGPHD1   | 4.41E-36 | 0.350439 | 0.464 | 0.034 | 8.03E-32 | CenC |
| ERG      | 7.50E-36 | 0.420988 | 0.536 | 0.043 | 1.36E-31 | CenC |
| HIST4H4  | 2.16E-35 | 0.321587 | 0.286 | 0.013 | 3.94E-31 | CenC |
| AK4      | 3.76E-35 | 0.936905 | 0.857 | 0.128 | 6.84E-31 | CenC |
| SEMA3C   | 4.23E-35 | 0.405597 | 0.536 | 0.044 | 7.70E-31 | CenC |
| SERPINI1 | 4.79E-34 | 1.698395 | 0.857 | 0.137 | 8.72E-30 | CenC |
| PTPRM    | 8.16E-34 | 0.426897 | 0.429 | 0.03  | 1.49E-29 | CenC |
| CYR1     | 1.87E-33 | 0.40646  | 0.393 | 0.026 | 3.40E-29 | CenC |
| HAAO     | 7.61E-33 | 0.331265 | 0.393 | 0.026 | 1.39E-28 | CenC |
| CD83     | 1.59E-32 | 0.685286 | 0.679 | 0.081 | 2.89E-28 | CenC |
| GULP1    | 2.33E-32 | 0.405395 | 0.5   | 0.042 | 4.24E-28 | CenC |
| SCARB1   | 2.62E-32 | 0.30212  | 0.286 | 0.015 | 4.77E-28 | CenC |
| CYTL1    | 9.04E-32 | 0.730397 | 0.821 | 0.109 | 1.65E-27 | CenC |
| ID4      | 2.52E-31 | 0.51125  | 0.643 | 0.074 | 4.58E-27 | CenC |
| SNCA     | 8.20E-31 | 0.753718 | 0.429 | 0.034 | 1.49E-26 | CenC |
| PCOLCE   | 9.30E-31 | 0.928079 | 0.857 | 0.136 | 1.69E-26 | CenC |
| SLC20A2  | 9.31E-31 | 0.509516 | 0.607 | 0.067 | 1.69E-26 | CenC |
| AMT      | 2.59E-30 | 0.282785 | 0.357 | 0.024 | 4.71E-26 | CenC |
| SMIM10   | 2.97E-30 | 0.323136 | 0.429 | 0.033 | 5.41E-26 | CenC |
| ITPKB    | 3.73E-30 | 0.285717 | 0.321 | 0.019 | 6.79E-26 | CenC |
| GMPR     | 4.40E-30 | 0.439103 | 0.643 | 0.073 | 8.02E-26 | CenC |
| ATP1B1   | 4.67E-30 | 1.352733 | 0.964 | 0.23  | 8.51E-26 | CenC |
| ALDOC    | 4.78E-30 | 0.884192 | 0.786 | 0.119 | 8.71E-26 | CenC |
| BNIP3    | 6.23E-30 | 0.308372 | 0.464 | 0.039 | 1.13E-25 | CenC |
| TSPAN6   | 6.90E-30 | 1.897499 | 1     | 0.293 | 1.26E-25 | CenC |
| SMOX     | 1.13E-29 | 0.289641 | 0.321 | 0.02  | 2.06E-25 | CenC |
| AK125699 | 2.05E-29 | 0.581336 | 0.571 | 0.063 | 3.74E-25 | CenC |
| NDNF     | 9.71E-29 | 0.684413 | 0.821 | 0.118 | 1.77E-24 | CenC |
| EGLN3    | 2.81E-28 | 0.860642 | 0.75  | 0.115 | 5.12E-24 | CenC |
| SLC16A3  | 5.76E-28 | 0.690919 | 0.857 | 0.142 | 1.05E-23 | CenC |

|              |          |          |       |       |          |      |
|--------------|----------|----------|-------|-------|----------|------|
| LAMB1        | 8.43E-28 | 0.655774 | 0.714 | 0.102 | 1.53E-23 | CenC |
| SMARCD3      | 1.00E-27 | 0.258718 | 0.286 | 0.017 | 1.83E-23 | CenC |
| AMIGO2       | 7.75E-27 | 0.486527 | 0.464 | 0.045 | 1.41E-22 | CenC |
| NUDT4        | 1.11E-26 | 0.985392 | 0.929 | 0.208 | 2.03E-22 | CenC |
| CHCHD10      | 1.18E-26 | 1.470709 | 0.964 | 0.283 | 2.15E-22 | CenC |
| NRN1         | 2.36E-26 | 0.549774 | 0.679 | 0.095 | 4.30E-22 | CenC |
| MAN1A1       | 2.64E-26 | 0.497319 | 0.429 | 0.04  | 4.81E-22 | CenC |
| TCEAL7       | 3.76E-26 | 0.412686 | 0.357 | 0.027 | 6.84E-22 | CenC |
| GPC4         | 4.03E-26 | 0.500033 | 0.571 | 0.067 | 7.33E-22 | CenC |
| FGF2         | 2.03E-25 | 0.37439  | 0.357 | 0.028 | 3.70E-21 | CenC |
| PFKP         | 2.45E-25 | 1.264354 | 0.929 | 0.267 | 4.46E-21 | CenC |
| SULF2        | 3.54E-25 | 0.652606 | 0.643 | 0.094 | 6.44E-21 | CenC |
| PTPRU        | 1.18E-24 | 0.332434 | 0.429 | 0.041 | 2.15E-20 | CenC |
| PBXIP1       | 1.84E-24 | 1.109462 | 0.857 | 0.196 | 3.36E-20 | CenC |
| MBD3         | 2.82E-24 | 0.36054  | 0.393 | 0.035 | 5.13E-20 | CenC |
| SULT1A1      | 8.67E-24 | 0.514503 | 0.536 | 0.067 | 1.58E-19 | CenC |
| LMX1B        | 2.00E-23 | 0.297272 | 0.357 | 0.03  | 3.64E-19 | CenC |
| AK055712     | 2.70E-23 | 0.312241 | 0.357 | 0.03  | 4.92E-19 | CenC |
| CAV1         | 2.92E-23 | 1.129196 | 1     | 0.263 | 5.32E-19 | CenC |
| FAM65B       | 5.45E-23 | 0.328454 | 0.429 | 0.043 | 9.93E-19 | CenC |
| TCEAL3       | 6.51E-23 | 0.881026 | 0.857 | 0.191 | 1.19E-18 | CenC |
| MAP4K3       | 6.93E-23 | 0.411275 | 0.464 | 0.051 | 1.26E-18 | CenC |
| TCF4         | 6.96E-23 | 0.713241 | 0.821 | 0.144 | 1.27E-18 | CenC |
| BC073897     | 1.02E-22 | 0.669788 | 0.607 | 0.089 | 1.86E-18 | CenC |
| B3GNT7       | 1.05E-22 | 0.774861 | 0.643 | 0.099 | 1.90E-18 | CenC |
| MYL9         | 1.35E-22 | 0.633154 | 0.607 | 0.088 | 2.46E-18 | CenC |
| MADD         | 1.59E-22 | 0.324852 | 0.357 | 0.032 | 2.90E-18 | CenC |
| FOXC1        | 2.95E-21 | 0.593804 | 0.786 | 0.157 | 5.37E-17 | CenC |
| IGFBP5       | 3.07E-21 | 0.482065 | 0.429 | 0.046 | 5.59E-17 | CenC |
| FSTL1        | 3.41E-21 | 0.853204 | 0.714 | 0.132 | 6.21E-17 | CenC |
| LOC728392    | 3.49E-21 | 0.476556 | 0.5   | 0.064 | 6.35E-17 | CenC |
| APP          | 3.58E-21 | 1.781258 | 1     | 0.567 | 6.52E-17 | CenC |
| TMEM64       | 4.20E-21 | 0.562355 | 0.536 | 0.075 | 7.66E-17 | CenC |
| NIN          | 5.41E-21 | 0.434816 | 0.5   | 0.066 | 9.85E-17 | CenC |
| SLC5A3       | 5.85E-21 | 0.278547 | 0.393 | 0.04  | 1.07E-16 | CenC |
| PRKAR1A      | 1.23E-20 | 1.42195  | 1     | 0.473 | 2.23E-16 | CenC |
| CDON         | 1.45E-20 | 0.387981 | 0.429 | 0.048 | 2.64E-16 | CenC |
| COX7A1       | 2.96E-20 | 1.409498 | 1     | 0.483 | 5.38E-16 | CenC |
| PPAP2B       | 3.20E-20 | 0.619414 | 0.929 | 0.2   | 5.82E-16 | CenC |
| PRUNE2       | 3.91E-20 | 0.297957 | 0.393 | 0.041 | 7.11E-16 | CenC |
| EPB41L2      | 4.21E-20 | 0.478173 | 0.5   | 0.067 | 7.66E-16 | CenC |
| DPYSL3       | 8.55E-20 | 0.649649 | 0.607 | 0.099 | 1.56E-15 | CenC |
| AKR1C1       | 9.48E-20 | 1.356775 | 0.857 | 0.225 | 1.73E-15 | CenC |
| RHOQ         | 1.31E-19 | 0.310199 | 0.429 | 0.05  | 2.39E-15 | CenC |
| LOC100129195 | 1.35E-19 | 0.584981 | 0.714 | 0.14  | 2.47E-15 | CenC |
| MIF          | 2.09E-19 | 1.16718  | 1     | 0.993 | 3.80E-15 | CenC |
| UQCRB        | 2.69E-19 | 1.156594 | 1     | 0.968 | 4.90E-15 | CenC |
| COX4I1       | 3.04E-19 | 1.143537 | 1     | 0.978 | 5.54E-15 | CenC |



|                |          |          |       |       |          |      |
|----------------|----------|----------|-------|-------|----------|------|
| GLI3           | 3.71E-19 | 0.304701 | 0.357 | 0.037 | 6.76E-15 | CenC |
| UQCRH          | 4.27E-19 | 1.287132 | 1     | 0.913 | 7.77E-15 | CenC |
| EMX2           | 4.62E-19 | 0.900853 | 0.929 | 0.271 | 8.42E-15 | CenC |
| CCDC144B       | 4.68E-19 | 0.285724 | 0.286 | 0.024 | 8.53E-15 | CenC |
| RBP1           | 4.92E-19 | 0.811454 | 0.643 | 0.121 | 8.95E-15 | CenC |
| KIAA0355       | 8.25E-19 | 0.39266  | 0.393 | 0.045 | 1.50E-14 | CenC |
| FLJ46906       | 1.05E-18 | 0.502984 | 0.464 | 0.063 | 1.91E-14 | CenC |
| ENSG0000021008 | 1.37E-18 | 1.395657 | 1     | 1     | 2.50E-14 | CenC |
| WNT5B          | 1.50E-18 | 0.300672 | 0.393 | 0.045 | 2.73E-14 | CenC |
| PTGDS          | 1.70E-18 | 1.906264 | 1     | 0.441 | 3.09E-14 | CenC |
| SLC25A4        | 2.05E-18 | 0.982446 | 1     | 0.451 | 3.74E-14 | CenC |
| C1orf54        | 2.06E-18 | 0.449235 | 0.429 | 0.055 | 3.75E-14 | CenC |
| COX6C          | 2.10E-18 | 0.897358 | 1     | 0.967 | 3.82E-14 | CenC |
| TPI1           | 2.20E-18 | 0.90003  | 1     | 0.967 | 4.00E-14 | CenC |
| NDUFA1         | 3.21E-18 | 0.971979 | 1     | 0.928 | 5.85E-14 | CenC |
| GAPDH          | 3.68E-18 | 1.160291 | 1     | 0.998 | 6.70E-14 | CenC |
| SMAD7          | 4.07E-18 | 0.278004 | 0.286 | 0.025 | 7.42E-14 | CenC |
| COX5B          | 4.24E-18 | 1.085354 | 1     | 0.963 | 7.72E-14 | CenC |
| LURAP1L        | 4.38E-18 | 0.318321 | 0.393 | 0.045 | 7.98E-14 | CenC |
| ZFH3           | 5.30E-18 | 0.608329 | 0.679 | 0.138 | 9.65E-14 | CenC |
| ITGB5          | 6.32E-18 | 0.430738 | 0.607 | 0.104 | 1.15E-13 | CenC |
| DDB1           | 6.71E-18 | 0.898807 | 0.857 | 0.253 | 1.22E-13 | CenC |
| MAGI2-AS3      | 7.68E-18 | 0.407023 | 0.5   | 0.073 | 1.40E-13 | CenC |
| PDLIM2         | 8.18E-18 | 0.810656 | 0.786 | 0.202 | 1.49E-13 | CenC |
| SMIM3          | 8.44E-18 | 0.687128 | 0.786 | 0.184 | 1.54E-13 | CenC |
| FAM195A        | 1.01E-17 | 0.627953 | 0.786 | 0.203 | 1.84E-13 | CenC |
| PRDX2          | 1.63E-17 | 0.979271 | 1     | 0.91  | 2.96E-13 | CenC |
| NDUFB9         | 2.74E-17 | 0.966166 | 1     | 0.855 | 4.99E-13 | CenC |
| APBB2          | 3.03E-17 | 0.334226 | 0.286 | 0.027 | 5.51E-13 | CenC |
| NDUFA4         | 3.17E-17 | 0.850927 | 1     | 0.961 | 5.77E-13 | CenC |
| BEX2           | 4.89E-17 | 0.833413 | 0.929 | 0.339 | 8.90E-13 | CenC |
| ATP5L          | 5.45E-17 | 0.827608 | 1     | 0.981 | 9.92E-13 | CenC |
| AHCYL1         | 6.73E-17 | 0.961691 | 0.893 | 0.339 | 1.22E-12 | CenC |
| COX7C          | 7.39E-17 | 0.852109 | 1     | 0.985 | 1.34E-12 | CenC |
| FBXO2          | 8.95E-17 | 0.607473 | 0.786 | 0.213 | 1.63E-12 | CenC |
| CALD1          | 1.05E-16 | 0.892949 | 0.929 | 0.288 | 1.92E-12 | CenC |
| MAGI3          | 1.20E-16 | 0.40293  | 0.464 | 0.07  | 2.18E-12 | CenC |
| GLS            | 1.21E-16 | 0.648293 | 0.857 | 0.237 | 2.20E-12 | CenC |
| CLDN11         | 1.24E-16 | 0.397053 | 0.571 | 0.093 | 2.26E-12 | CenC |
| TMEM160        | 1.28E-16 | 1.085153 | 0.964 | 0.529 | 2.33E-12 | CenC |
| HSD17B14       | 1.29E-16 | 0.303169 | 0.321 | 0.034 | 2.34E-12 | CenC |
| HMGXB3         | 1.40E-16 | 0.32461  | 0.393 | 0.051 | 2.55E-12 | CenC |
| GSTM3          | 1.40E-16 | 0.703784 | 0.857 | 0.23  | 2.55E-12 | CenC |
| PITX1          | 1.44E-16 | 0.562819 | 0.607 | 0.112 | 2.62E-12 | CenC |
| GPI            | 1.75E-16 | 0.974459 | 0.929 | 0.392 | 3.18E-12 | CenC |
| NGFRAP1        | 1.86E-16 | 1.104607 | 1     | 0.763 | 3.39E-12 | CenC |
| DMKN           | 2.21E-16 | 0.465964 | 0.607 | 0.116 | 4.02E-12 | CenC |
| ARL5A          | 2.53E-16 | 1.023368 | 0.964 | 0.52  | 4.60E-12 | CenC |

|                |          |          |       |       |          |      |
|----------------|----------|----------|-------|-------|----------|------|
| IER3           | 2.74E-16 | 1.311322 | 1     | 0.832 | 4.99E-12 | CenC |
| ENSG0000019888 | 4.55E-16 | 0.865171 | 1     | 0.998 | 8.28E-12 | CenC |
| CDC42EP3       | 4.81E-16 | 0.486287 | 0.679 | 0.138 | 8.75E-12 | CenC |
| NRIP3          | 5.44E-16 | 0.256603 | 0.286 | 0.029 | 9.90E-12 | CenC |
| LOC143666      | 5.70E-16 | 0.455241 | 0.357 | 0.045 | 1.04E-11 | CenC |
| PDK1           | 6.85E-16 | 0.316839 | 0.393 | 0.052 | 1.25E-11 | CenC |
| ATP5G3         | 8.54E-16 | 0.951211 | 1     | 0.902 | 1.56E-11 | CenC |
| A1BG           | 8.64E-16 | 0.344914 | 0.5   | 0.078 | 1.57E-11 | CenC |
| ATP5J          | 8.91E-16 | 0.797923 | 1     | 0.94  | 1.62E-11 | CenC |
| SMC2           | 1.03E-15 | 0.598173 | 0.607 | 0.124 | 1.88E-11 | CenC |
| ARHGEF37       | 1.24E-15 | 0.278281 | 0.286 | 0.029 | 2.26E-11 | CenC |
| APOL2          | 1.39E-15 | 0.268188 | 0.393 | 0.052 | 2.53E-11 | CenC |
| NDUFS3         | 1.43E-15 | 0.743172 | 1     | 0.591 | 2.61E-11 | CenC |
| COL12A1        | 1.69E-15 | 0.443218 | 0.857 | 0.192 | 3.08E-11 | CenC |
| CRIM1          | 1.72E-15 | 0.754384 | 0.821 | 0.254 | 3.13E-11 | CenC |
| DDIT4          | 1.78E-15 | 1.485711 | 0.964 | 0.463 | 3.25E-11 | CenC |
| RPL21          | 1.91E-15 | 0.714745 | 1     | 0.999 | 3.47E-11 | CenC |
| EVA1B          | 1.91E-15 | 0.263505 | 0.357 | 0.044 | 3.48E-11 | CenC |
| ENSG0000021145 | 1.99E-15 | 1.197272 | 1     | 0.997 | 3.62E-11 | CenC |
| COX6B1         | 2.07E-15 | 0.877383 | 1     | 0.949 | 3.76E-11 | CenC |
| ZMAT3          | 2.27E-15 | 0.490956 | 0.536 | 0.098 | 4.13E-11 | CenC |
| RCAN1          | 2.77E-15 | 0.557195 | 0.393 | 0.058 | 5.04E-11 | CenC |
| PDK4           | 3.06E-15 | 0.389499 | 0.429 | 0.062 | 5.58E-11 | CenC |
| POLR2L         | 3.12E-15 | 0.733541 | 1     | 0.966 | 5.68E-11 | CenC |
| RBMS3          | 3.36E-15 | 0.282207 | 0.357 | 0.044 | 6.12E-11 | CenC |
| IFI6           | 3.71E-15 | 0.943109 | 0.786 | 0.203 | 6.76E-11 | CenC |
| ATP5O          | 5.06E-15 | 0.945273 | 1     | 0.912 | 9.22E-11 | CenC |
| ABLIM1         | 5.09E-15 | 0.493628 | 0.571 | 0.115 | 9.26E-11 | CenC |
| ENSG0000019871 | 5.30E-15 | 0.847531 | 1     | 0.997 | 9.65E-11 | CenC |
| COX7B          | 5.73E-15 | 0.803891 | 1     | 0.937 | 1.04E-10 | CenC |
| ATP1A1         | 8.30E-15 | 1.000741 | 0.964 | 0.589 | 1.51E-10 | CenC |
| GLIS1          | 8.44E-15 | 0.292969 | 0.321 | 0.038 | 1.54E-10 | CenC |
| ATP5B          | 8.51E-15 | 0.79055  | 1     | 0.917 | 1.55E-10 | CenC |
| COL1A2         | 9.01E-15 | 0.387242 | 0.75  | 0.158 | 1.64E-10 | CenC |
| STON2          | 9.99E-15 | 0.496943 | 0.5   | 0.091 | 1.82E-10 | CenC |
| SETD3          | 1.37E-14 | 0.550473 | 0.679 | 0.174 | 2.49E-10 | CenC |
| IGFBP2         | 1.43E-14 | 1.02041  | 0.964 | 0.555 | 2.61E-10 | CenC |
| WDR54          | 1.58E-14 | 0.544954 | 0.75  | 0.203 | 2.87E-10 | CenC |
| RERG           | 1.60E-14 | 0.493572 | 0.786 | 0.201 | 2.91E-10 | CenC |
| CDKN1C         | 1.65E-14 | 0.516958 | 0.679 | 0.16  | 3.01E-10 | CenC |
| PKIG           | 1.82E-14 | 0.546344 | 0.714 | 0.175 | 3.32E-10 | CenC |
| ENSG0000021290 | 2.96E-14 | 0.995781 | 1     | 0.839 | 5.39E-10 | CenC |
| LRIG1          | 3.19E-14 | 0.527767 | 0.5   | 0.097 | 5.81E-10 | CenC |
| NDUFA13        | 3.49E-14 | 0.756579 | 1     | 0.936 | 6.36E-10 | CenC |
| ATP5I          | 3.67E-14 | 0.841022 | 1     | 0.919 | 6.68E-10 | CenC |
| AQP1           | 4.53E-14 | 0.301025 | 0.821 | 0.184 | 8.25E-10 | CenC |
| FADS1          | 5.04E-14 | 0.258293 | 0.393 | 0.057 | 9.17E-10 | CenC |
| TMEM139        | 5.07E-14 | 0.299907 | 0.286 | 0.033 | 9.23E-10 | CenC |

|                |          |          |       |       |          |      |
|----------------|----------|----------|-------|-------|----------|------|
| PIK3R1         | 5.62E-14 | 0.452787 | 0.571 | 0.117 | 1.02E-09 | CenC |
| HPS5           | 5.83E-14 | 0.45083  | 0.5   | 0.096 | 1.06E-09 | CenC |
| NDUFB2         | 5.86E-14 | 0.927159 | 1     | 0.864 | 1.07E-09 | CenC |
| DYNLRB2        | 5.87E-14 | 0.333844 | 0.393 | 0.058 | 1.07E-09 | CenC |
| NDUFB8         | 6.18E-14 | 0.961459 | 1     | 0.84  | 1.12E-09 | CenC |
| TSC22D1        | 7.41E-14 | 1.163186 | 1     | 0.587 | 1.35E-09 | CenC |
| SNRPN          | 7.47E-14 | 0.778507 | 0.964 | 0.583 | 1.36E-09 | CenC |
| CCK            | 8.16E-14 | 1.468991 | 0.536 | 0.118 | 1.49E-09 | CenC |
| MORN2          | 9.60E-14 | 0.581258 | 0.75  | 0.226 | 1.75E-09 | CenC |
| ENSG0000019878 | 9.93E-14 | 0.93171  | 1     | 0.975 | 1.81E-09 | CenC |
| TES            | 1.09E-13 | 0.743555 | 0.75  | 0.235 | 1.98E-09 | CenC |
| ARMCX3         | 1.75E-13 | 0.378606 | 0.571 | 0.113 | 3.18E-09 | CenC |
| NDUFB7         | 1.79E-13 | 0.794677 | 1     | 0.851 | 3.26E-09 | CenC |
| ATP5A1         | 2.20E-13 | 0.818527 | 1     | 0.829 | 4.01E-09 | CenC |
| FAM162A        | 2.44E-13 | 0.772597 | 1     | 0.749 | 4.44E-09 | CenC |
| STK35          | 2.70E-13 | 0.581862 | 0.821 | 0.273 | 4.92E-09 | CenC |
| VIM            | 2.75E-13 | 0.61961  | 1     | 0.33  | 5.01E-09 | CenC |
| GNAS           | 3.44E-13 | 0.899708 | 1     | 0.659 | 6.26E-09 | CenC |
| EIF3K          | 3.55E-13 | 0.750847 | 1     | 0.897 | 6.46E-09 | CenC |
| AKR1B1         | 3.86E-13 | 0.825121 | 0.964 | 0.467 | 7.03E-09 | CenC |
| COX7A2         | 3.88E-13 | 0.694628 | 1     | 0.976 | 7.07E-09 | CenC |
| GCSH           | 4.51E-13 | 0.721001 | 1     | 0.479 | 8.21E-09 | CenC |
| SEC14L1        | 4.72E-13 | 0.404668 | 0.607 | 0.138 | 8.59E-09 | CenC |
| ADD3           | 4.78E-13 | 0.597546 | 0.679 | 0.185 | 8.71E-09 | CenC |
| CTSZ           | 5.24E-13 | 0.424973 | 0.607 | 0.138 | 9.54E-09 | CenC |
| CXADR          | 5.88E-13 | 0.828752 | 0.929 | 0.555 | 1.07E-08 | CenC |
| RPS27A         | 6.67E-13 | 0.517603 | 1     | 0.997 | 1.21E-08 | CenC |
| TIMP2          | 8.64E-13 | 0.320236 | 0.679 | 0.145 | 1.57E-08 | CenC |
| SLC25A6        | 9.41E-13 | 0.783924 | 1     | 0.897 | 1.71E-08 | CenC |
| SMYD3          | 1.14E-12 | 0.402099 | 0.536 | 0.117 | 2.08E-08 | CenC |
| PFKM           | 1.26E-12 | 0.398484 | 0.607 | 0.141 | 2.29E-08 | CenC |
| HEXIM1         | 1.47E-12 | 0.676382 | 0.929 | 0.407 | 2.67E-08 | CenC |
| RHOBTB3        | 1.69E-12 | 0.655671 | 0.714 | 0.21  | 3.09E-08 | CenC |
| AHDC1          | 1.71E-12 | 0.402537 | 0.464 | 0.09  | 3.11E-08 | CenC |
| PHPT1          | 1.73E-12 | 0.868736 | 1     | 0.771 | 3.15E-08 | CenC |
| PGK1           | 1.77E-12 | 0.721873 | 1     | 0.885 | 3.22E-08 | CenC |
| KDM6B          | 2.07E-12 | 0.414432 | 0.571 | 0.127 | 3.77E-08 | CenC |
| AFAP1L2        | 2.12E-12 | 0.339554 | 0.286 | 0.037 | 3.86E-08 | CenC |
| INSIG1         | 2.16E-12 | 0.70507  | 0.714 | 0.227 | 3.93E-08 | CenC |
| PDPN           | 2.41E-12 | 0.342385 | 0.5   | 0.099 | 4.39E-08 | CenC |
| DPCD           | 2.78E-12 | 0.462692 | 0.536 | 0.123 | 5.06E-08 | CenC |
| SLC16A11       | 3.15E-12 | 0.320648 | 0.429 | 0.076 | 5.73E-08 | CenC |
| CYC1           | 3.96E-12 | 0.652161 | 1     | 0.717 | 7.21E-08 | CenC |
| IFITM2         | 4.27E-12 | 0.401215 | 0.75  | 0.186 | 7.77E-08 | CenC |
| GMDS           | 4.35E-12 | 0.732075 | 0.857 | 0.375 | 7.93E-08 | CenC |
| SELM           | 4.39E-12 | 0.684759 | 0.929 | 0.342 | 7.99E-08 | CenC |
| WDR74          | 4.56E-12 | 1.092045 | 0.821 | 0.37  | 8.30E-08 | CenC |
| ENSG0000019880 | 4.89E-12 | 0.600997 | 1     | 0.998 | 8.91E-08 | CenC |

|                |          |          |       |       |          |      |
|----------------|----------|----------|-------|-------|----------|------|
| RPS27L         | 6.20E-12 | 0.844056 | 1     | 0.845 | 1.13E-07 | CenC |
| SNHG6          | 8.92E-12 | 0.763312 | 1     | 0.76  | 1.62E-07 | CenC |
| H2AFJ          | 1.04E-11 | 0.863834 | 0.929 | 0.554 | 1.89E-07 | CenC |
| TIFA           | 1.09E-11 | 0.321421 | 0.536 | 0.118 | 1.98E-07 | CenC |
| RPL34          | 1.15E-11 | 0.489393 | 1     | 1     | 2.10E-07 | CenC |
| LINC00152      | 1.40E-11 | 0.371032 | 0.536 | 0.112 | 2.55E-07 | CenC |
| FN3K           | 1.49E-11 | 0.298974 | 0.357 | 0.059 | 2.72E-07 | CenC |
| CTGF           | 1.63E-11 | 0.82214  | 0.714 | 0.2   | 2.97E-07 | CenC |
| COL4A5         | 1.82E-11 | 0.285824 | 0.357 | 0.058 | 3.32E-07 | CenC |
| HUWE1          | 1.93E-11 | 0.289283 | 0.393 | 0.069 | 3.52E-07 | CenC |
| NTN4           | 2.35E-11 | 0.365977 | 0.5   | 0.101 | 4.28E-07 | CenC |
| LOC100506421   | 2.54E-11 | 0.375489 | 0.607 | 0.137 | 4.63E-07 | CenC |
| VPS41          | 2.87E-11 | 0.383776 | 0.5   | 0.111 | 5.23E-07 | CenC |
| ID3            | 2.92E-11 | 0.83641  | 1     | 0.76  | 5.32E-07 | CenC |
| KANSL3         | 2.93E-11 | 0.250346 | 0.321 | 0.049 | 5.34E-07 | CenC |
| RBMS1          | 2.94E-11 | 0.397606 | 0.643 | 0.175 | 5.36E-07 | CenC |
| ENO1           | 3.02E-11 | 0.600027 | 1     | 0.994 | 5.50E-07 | CenC |
| SLC22A4        | 3.18E-11 | 0.267994 | 0.357 | 0.058 | 5.78E-07 | CenC |
| RASIP1         | 3.55E-11 | 0.287374 | 0.321 | 0.05  | 6.46E-07 | CenC |
| IL13RA1        | 3.60E-11 | 0.337008 | 0.536 | 0.123 | 6.55E-07 | CenC |
| PDLIM4         | 4.93E-11 | 0.588736 | 0.75  | 0.254 | 8.98E-07 | CenC |
| MPC2           | 5.38E-11 | 0.590828 | 1     | 0.682 | 9.79E-07 | CenC |
| ENSG0000021019 | 5.48E-11 | 0.834694 | 0.75  | 0.273 | 9.98E-07 | CenC |
| TJP1           | 5.64E-11 | 0.384739 | 0.643 | 0.172 | 1.03E-06 | CenC |
| USMG5          | 5.75E-11 | 0.664888 | 1     | 0.95  | 1.05E-06 | CenC |
| DNAJC1         | 5.78E-11 | 0.578706 | 0.714 | 0.246 | 1.05E-06 | CenC |
| EFNA5          | 5.79E-11 | 0.413305 | 0.464 | 0.101 | 1.05E-06 | CenC |
| NDUFB1         | 5.81E-11 | 0.592138 | 1     | 0.877 | 1.06E-06 | CenC |
| SMIM1          | 6.32E-11 | 0.263478 | 0.393 | 0.072 | 1.15E-06 | CenC |
| PGAM1          | 7.43E-11 | 0.664469 | 1     | 0.883 | 1.35E-06 | CenC |
| OSTC           | 7.47E-11 | 0.919805 | 0.929 | 0.636 | 1.36E-06 | CenC |
| NAV1           | 7.72E-11 | 0.289344 | 0.321 | 0.051 | 1.41E-06 | CenC |
| UQCRQ          | 7.78E-11 | 0.672107 | 1     | 0.95  | 1.42E-06 | CenC |
| ENSG0000019876 | 7.86E-11 | 0.760718 | 1     | 0.983 | 1.43E-06 | CenC |
| SRP14-AS1      | 7.97E-11 | 0.253326 | 0.357 | 0.061 | 1.45E-06 | CenC |
| RPL31          | 8.24E-11 | 0.433995 | 1     | 0.998 | 1.50E-06 | CenC |
| RAB11FIP2      | 9.54E-11 | 0.344029 | 0.5   | 0.112 | 1.74E-06 | CenC |
| SNHG10         | 9.89E-11 | 0.264898 | 0.393 | 0.072 | 1.80E-06 | CenC |
| CCL2           | 1.00E-10 | 0.80956  | 0.464 | 0.101 | 1.83E-06 | CenC |
| EEF1A1         | 1.02E-10 | 0.476404 | 1     | 1     | 1.85E-06 | CenC |
| PTPRN2         | 1.14E-10 | 0.315749 | 0.393 | 0.076 | 2.08E-06 | CenC |
| DNPH1          | 1.22E-10 | 0.576498 | 0.786 | 0.327 | 2.22E-06 | CenC |
| NDUFS7         | 1.22E-10 | 0.709637 | 0.964 | 0.604 | 2.23E-06 | CenC |
| ERRFI1         | 1.31E-10 | 0.728415 | 0.75  | 0.3   | 2.39E-06 | CenC |
| DDT            | 1.53E-10 | 0.748353 | 0.964 | 0.716 | 2.79E-06 | CenC |
| SLC35E1        | 1.62E-10 | 0.304116 | 0.393 | 0.075 | 2.95E-06 | CenC |
| HYAL1          | 1.70E-10 | 0.307666 | 0.321 | 0.053 | 3.09E-06 | CenC |
| NUPL1          | 1.76E-10 | 0.280504 | 0.429 | 0.088 | 3.20E-06 | CenC |

|                |          |          |       |       |          |      |
|----------------|----------|----------|-------|-------|----------|------|
| UQCR11         | 1.76E-10 | 0.543367 | 1     | 0.965 | 3.20E-06 | CenC |
| TIMP3          | 1.89E-10 | 0.71359  | 0.857 | 0.346 | 3.44E-06 | CenC |
| ID2            | 1.92E-10 | 0.721482 | 0.964 | 0.559 | 3.50E-06 | CenC |
| SLC20A1        | 1.94E-10 | 0.589325 | 0.964 | 0.429 | 3.53E-06 | CenC |
| ZFHX4          | 2.02E-10 | 0.412612 | 0.429 | 0.088 | 3.68E-06 | CenC |
| PHACTR2        | 2.27E-10 | 0.532568 | 0.75  | 0.267 | 4.13E-06 | CenC |
| WWTR1          | 2.59E-10 | 0.387301 | 0.536 | 0.138 | 4.72E-06 | CenC |
| ESYT1          | 2.62E-10 | 0.370808 | 0.357 | 0.064 | 4.77E-06 | CenC |
| SDHA           | 2.69E-10 | 0.651744 | 0.821 | 0.359 | 4.90E-06 | CenC |
| EFEMP1         | 2.91E-10 | 0.736954 | 0.786 | 0.314 | 5.30E-06 | CenC |
| NDUFB10        | 3.05E-10 | 0.550918 | 1     | 0.811 | 5.55E-06 | CenC |
| MYH9           | 3.29E-10 | 0.620967 | 0.679 | 0.244 | 5.99E-06 | CenC |
| FOXO1          | 3.32E-10 | 0.290272 | 0.393 | 0.077 | 6.05E-06 | CenC |
| MRPL21         | 3.59E-10 | 0.597483 | 0.929 | 0.472 | 6.55E-06 | CenC |
| P4HA1          | 3.63E-10 | 0.411744 | 0.429 | 0.093 | 6.61E-06 | CenC |
| TOMM7          | 3.83E-10 | 0.532191 | 1     | 0.969 | 6.97E-06 | CenC |
| TWIST1         | 4.50E-10 | 0.260075 | 0.357 | 0.063 | 8.20E-06 | CenC |
| B3GNT1         | 4.57E-10 | 0.428432 | 0.464 | 0.107 | 8.33E-06 | CenC |
| ENSG0000019888 | 4.89E-10 | 0.668978 | 1     | 0.96  | 8.90E-06 | CenC |
| NDUFB3         | 5.27E-10 | 0.59433  | 1     | 0.825 | 9.60E-06 | CenC |
| TLE4           | 5.41E-10 | 0.40808  | 0.714 | 0.223 | 9.85E-06 | CenC |
| NDUFAB1        | 5.53E-10 | 0.651651 | 0.964 | 0.803 | 1.01E-05 | CenC |
| ATN1           | 6.15E-10 | 0.352117 | 0.536 | 0.134 | 1.12E-05 | CenC |
| ATP6VOE2       | 6.57E-10 | 0.316055 | 0.429 | 0.093 | 1.20E-05 | CenC |
| ATP5D          | 7.05E-10 | 0.581887 | 0.964 | 0.803 | 1.28E-05 | CenC |
| COX17          | 8.43E-10 | 0.56755  | 0.964 | 0.592 | 1.53E-05 | CenC |
| COX6A1         | 8.91E-10 | 0.463083 | 1     | 0.978 | 1.62E-05 | CenC |
| CLEC11A        | 9.13E-10 | 0.595723 | 0.714 | 0.266 | 1.66E-05 | CenC |
| SPRY2          | 9.48E-10 | 0.429398 | 0.429 | 0.096 | 1.73E-05 | CenC |
| FBXL17         | 1.02E-09 | 0.265743 | 0.286 | 0.045 | 1.85E-05 | CenC |
| MRPL41         | 1.02E-09 | 0.692685 | 0.964 | 0.674 | 1.87E-05 | CenC |
| HINT1          | 1.04E-09 | 0.529371 | 1     | 0.973 | 1.89E-05 | CenC |
| MINOS1         | 1.10E-09 | 0.561119 | 1     | 0.891 | 2.00E-05 | CenC |
| QDPR           | 1.25E-09 | 0.45121  | 0.714 | 0.245 | 2.28E-05 | CenC |
| C1orf122       | 1.30E-09 | 0.499174 | 0.821 | 0.339 | 2.37E-05 | CenC |
| NDUFA6         | 1.36E-09 | 0.596648 | 1     | 0.813 | 2.48E-05 | CenC |
| ALDH7A1        | 1.41E-09 | 0.707133 | 0.964 | 0.607 | 2.57E-05 | CenC |
| C21orf33       | 1.46E-09 | 0.56601  | 0.857 | 0.391 | 2.66E-05 | CenC |
| SERPINB6       | 1.61E-09 | 0.441489 | 0.75  | 0.268 | 2.94E-05 | CenC |
| C14orf2        | 1.66E-09 | 0.524284 | 1     | 0.953 | 3.03E-05 | CenC |
| FAM229B        | 1.68E-09 | 0.469619 | 0.571 | 0.163 | 3.07E-05 | CenC |
| LDHB           | 1.71E-09 | 0.615289 | 1     | 0.838 | 3.12E-05 | CenC |
| DPYSL2         | 1.83E-09 | 0.334584 | 0.536 | 0.134 | 3.34E-05 | CenC |
| CPEB4          | 1.90E-09 | 0.466731 | 0.536 | 0.145 | 3.46E-05 | CenC |
| CNN3           | 1.93E-09 | 0.541639 | 0.857 | 0.361 | 3.52E-05 | CenC |
| ENSG0000019872 | 2.13E-09 | 0.542449 | 1     | 0.993 | 3.88E-05 | CenC |
| CTNNA1         | 2.56E-09 | 0.529945 | 0.679 | 0.227 | 4.66E-05 | CenC |
| ENSG0000019889 | 2.64E-09 | 0.606558 | 1     | 0.988 | 4.81E-05 | CenC |

|            |          |          |       |       |          |      |
|------------|----------|----------|-------|-------|----------|------|
| RPS3       | 3.05E-09 | 0.432133 | 1     | 0.996 | 5.56E-05 | CenC |
| LOC338799  | 3.18E-09 | 0.324929 | 0.393 | 0.083 | 5.80E-05 | CenC |
| VDAC3      | 3.23E-09 | 0.645455 | 0.893 | 0.585 | 5.88E-05 | CenC |
| CSTF3      | 3.33E-09 | 0.404826 | 0.679 | 0.217 | 6.06E-05 | CenC |
| RPL41      | 4.04E-09 | 0.332842 | 1     | 1     | 7.35E-05 | CenC |
| TMEM129    | 4.06E-09 | 0.371678 | 0.464 | 0.117 | 7.39E-05 | CenC |
| MAF        | 4.33E-09 | 0.288573 | 0.393 | 0.086 | 7.89E-05 | CenC |
| ATP5G1     | 5.15E-09 | 0.798905 | 0.964 | 0.784 | 9.38E-05 | CenC |
| MZT2B      | 5.21E-09 | 0.583016 | 0.964 | 0.701 | 9.49E-05 | CenC |
| CA11       | 5.28E-09 | 0.421894 | 0.5   | 0.132 | 9.61E-05 | CenC |
| COL5A2     | 6.10E-09 | 0.303334 | 0.464 | 0.108 | 0.000111 | CenC |
| HYOU1      | 6.34E-09 | 0.268692 | 0.357 | 0.073 | 0.000115 | CenC |
| ESRRA      | 6.47E-09 | 0.335854 | 0.464 | 0.118 | 0.000118 | CenC |
| RPS8       | 7.37E-09 | 0.437774 | 1     | 0.999 | 0.000134 | CenC |
| CIRBP      | 7.53E-09 | 0.491089 | 1     | 0.981 | 0.000137 | CenC |
| BCAR3      | 7.57E-09 | 0.252985 | 0.357 | 0.073 | 0.000138 | CenC |
| ANKH       | 7.64E-09 | 0.428043 | 0.536 | 0.143 | 0.000139 | CenC |
| CADM1      | 8.27E-09 | 0.527607 | 0.607 | 0.197 | 0.000151 | CenC |
| CYCS       | 8.39E-09 | 0.630645 | 1     | 0.87  | 0.000153 | CenC |
| SLC2A1-AS1 | 8.81E-09 | 0.27068  | 0.357 | 0.075 | 0.00016  | CenC |
| DL491896   | 8.89E-09 | 0.380336 | 0.679 | 0.229 | 0.000162 | CenC |
| HILPDA     | 9.06E-09 | 0.792928 | 0.464 | 0.128 | 0.000165 | CenC |
| IRF2BPL    | 9.08E-09 | 0.539601 | 0.75  | 0.308 | 0.000165 | CenC |
| TMEM141    | 9.56E-09 | 0.578131 | 0.893 | 0.487 | 0.000174 | CenC |
| NDUFS4     | 1.28E-08 | 0.544951 | 1     | 0.757 | 0.000233 | CenC |
| VAMP2      | 1.29E-08 | 0.600494 | 1     | 0.751 | 0.000236 | CenC |
| UQCRC2     | 1.30E-08 | 0.612412 | 0.929 | 0.647 | 0.000237 | CenC |
| MGARP      | 1.33E-08 | 0.641846 | 1     | 0.827 | 0.000243 | CenC |
| HSPD1      | 1.38E-08 | 0.53393  | 0.929 | 0.69  | 0.000252 | CenC |
| C4orf48    | 1.48E-08 | 0.389636 | 0.536 | 0.155 | 0.000269 | CenC |
| RPL7       | 1.48E-08 | 0.363968 | 1     | 0.999 | 0.000269 | CenC |
| AKAP13     | 1.52E-08 | 0.410151 | 0.571 | 0.179 | 0.000277 | CenC |
| ANKRD9     | 1.54E-08 | 0.274004 | 0.429 | 0.102 | 0.00028  | CenC |
| ABHD14A    | 1.57E-08 | 0.340448 | 0.464 | 0.121 | 0.000285 | CenC |
| PGP        | 1.60E-08 | 0.389207 | 0.5   | 0.15  | 0.000292 | CenC |
| SNHG8      | 1.68E-08 | 0.568636 | 0.964 | 0.7   | 0.000305 | CenC |
| LAGE3      | 1.82E-08 | 0.485279 | 0.857 | 0.456 | 0.000332 | CenC |
| MYO1B      | 1.93E-08 | 0.357593 | 0.464 | 0.119 | 0.000352 | CenC |
| WDR61      | 1.99E-08 | 0.582623 | 0.929 | 0.624 | 0.000362 | CenC |
| CCDC85B    | 2.14E-08 | 0.633087 | 0.857 | 0.551 | 0.000389 | CenC |
| EMX2OS     | 2.28E-08 | 0.3104   | 0.429 | 0.106 | 0.000416 | CenC |
| TMEM106C   | 2.39E-08 | 0.403186 | 0.714 | 0.267 | 0.000434 | CenC |
| SLC25A5    | 2.78E-08 | 0.596653 | 1     | 0.874 | 0.000506 | CenC |
| ST13       | 2.82E-08 | 0.531966 | 0.964 | 0.852 | 0.000513 | CenC |
| CCDC151    | 2.96E-08 | 0.341539 | 0.357 | 0.078 | 0.000539 | CenC |
| TCEA2      | 2.99E-08 | 0.435631 | 0.714 | 0.276 | 0.000544 | CenC |
| CBX5       | 3.01E-08 | 0.369294 | 0.536 | 0.161 | 0.000547 | CenC |
| QKI        | 3.08E-08 | 0.298032 | 0.464 | 0.12  | 0.000561 | CenC |

|           |          |          |       |       |          |      |
|-----------|----------|----------|-------|-------|----------|------|
| UROD      | 3.17E-08 | 0.433441 | 0.893 | 0.446 | 0.000578 | CenC |
| PBX1      | 3.21E-08 | 0.478357 | 0.536 | 0.171 | 0.000584 | CenC |
| PIAS2     | 3.33E-08 | 0.293035 | 0.357 | 0.076 | 0.000607 | CenC |
| LINC00685 | 3.72E-08 | 0.298067 | 0.5   | 0.142 | 0.000677 | CenC |
| RPL38     | 3.96E-08 | 0.398679 | 1     | 0.989 | 0.000721 | CenC |
| SMIM4     | 4.03E-08 | 0.544124 | 0.714 | 0.334 | 0.000734 | CenC |
| ARL2      | 4.27E-08 | 0.483867 | 0.857 | 0.463 | 0.000777 | CenC |
| NUMA1     | 4.68E-08 | 0.310797 | 0.607 | 0.186 | 0.000852 | CenC |
| RABL5     | 4.94E-08 | 0.37447  | 0.429 | 0.114 | 0.0009   | CenC |
| NDUFB5    | 5.48E-08 | 0.509644 | 0.929 | 0.69  | 0.000998 | CenC |
| SNRNP200  | 5.54E-08 | 0.304554 | 0.536 | 0.161 | 0.001008 | CenC |
| NDUFAF4   | 5.57E-08 | 0.426282 | 0.714 | 0.28  | 0.001013 | CenC |
| HIST1H4C  | 5.68E-08 | 0.591582 | 0.679 | 0.291 | 0.001033 | CenC |
| LOC541471 | 5.68E-08 | 0.343544 | 0.571 | 0.167 | 0.001035 | CenC |
| LANCL1    | 5.80E-08 | 0.292645 | 0.357 | 0.082 | 0.001056 | CenC |
| VOPP1     | 6.15E-08 | 0.393882 | 0.429 | 0.112 | 0.001119 | CenC |
| MPC1      | 6.77E-08 | 0.48432  | 0.893 | 0.559 | 0.001232 | CenC |
| PRCP      | 7.22E-08 | 0.511387 | 0.714 | 0.311 | 0.001315 | CenC |
| DPP7      | 7.33E-08 | 0.546075 | 0.821 | 0.475 | 0.001335 | CenC |
| TCEAL4    | 7.68E-08 | 0.589632 | 0.964 | 0.625 | 0.001398 | CenC |
| REPIN1    | 8.13E-08 | 0.288294 | 0.464 | 0.126 | 0.00148  | CenC |
| ARID5B    | 8.27E-08 | 0.473561 | 0.893 | 0.429 | 0.001506 | CenC |
| AKR1C2    | 8.75E-08 | 0.482843 | 0.75  | 0.31  | 0.001593 | CenC |
| GLRX5     | 8.76E-08 | 0.546327 | 0.75  | 0.368 | 0.001595 | CenC |
| USP11     | 9.26E-08 | 0.382333 | 0.5   | 0.153 | 0.001687 | CenC |
| DQ570096  | 1.07E-07 | 0.272015 | 0.321 | 0.068 | 0.001941 | CenC |
| RPL26     | 1.15E-07 | 0.324005 | 1     | 0.999 | 0.002096 | CenC |
| LRPPRC    | 1.16E-07 | 0.28239  | 0.393 | 0.097 | 0.002112 | CenC |
| TAB2      | 1.18E-07 | 0.250739 | 0.357 | 0.082 | 0.00214  | CenC |
| COX20     | 1.20E-07 | 0.532483 | 0.929 | 0.543 | 0.002193 | CenC |
| HIPK3     | 1.23E-07 | 0.286712 | 0.357 | 0.084 | 0.002236 | CenC |
| LDLR      | 1.32E-07 | 0.262966 | 0.429 | 0.109 | 0.002399 | CenC |
| NXPH4     | 1.60E-07 | 0.267419 | 0.357 | 0.083 | 0.002914 | CenC |
| RPL8      | 1.64E-07 | 0.311974 | 1     | 0.998 | 0.002985 | CenC |
| SNAPC1    | 1.66E-07 | 0.256707 | 0.536 | 0.16  | 0.003014 | CenC |
| TMEM55A   | 1.70E-07 | 0.262245 | 0.5   | 0.138 | 0.003099 | CenC |
| DANCR     | 2.12E-07 | 0.633589 | 0.929 | 0.654 | 0.003859 | CenC |
| DDIT3     | 2.15E-07 | 0.652384 | 0.893 | 0.549 | 0.003909 | CenC |
| LINC00657 | 2.19E-07 | 0.482047 | 0.857 | 0.52  | 0.003981 | CenC |
| LOC654342 | 2.21E-07 | 0.328535 | 0.643 | 0.226 | 0.00403  | CenC |
| FXN       | 2.30E-07 | 0.314601 | 0.393 | 0.105 | 0.004185 | CenC |
| SLC2A1    | 2.50E-07 | 0.501895 | 1     | 0.86  | 0.004548 | CenC |
| SERPINF1  | 2.53E-07 | 0.316308 | 0.929 | 0.525 | 0.004609 | CenC |
| ZNF664    | 2.60E-07 | 0.259517 | 0.393 | 0.102 | 0.004743 | CenC |
| CLTC      | 2.72E-07 | 0.274996 | 0.536 | 0.168 | 0.004951 | CenC |
| ST20      | 3.00E-07 | 0.290534 | 0.321 | 0.075 | 0.005462 | CenC |
| BNIP3L    | 3.04E-07 | 0.560501 | 0.893 | 0.621 | 0.005542 | CenC |
| LARP6     | 3.11E-07 | 0.279813 | 0.5   | 0.139 | 0.005671 | CenC |

|                 |          |          |       |       |          |      |
|-----------------|----------|----------|-------|-------|----------|------|
| SLC12A4         | 3.16E-07 | 0.286614 | 0.393 | 0.099 | 0.00575  | CenC |
| HIBADH          | 3.37E-07 | 0.403913 | 0.75  | 0.292 | 0.006134 | CenC |
| NDUFS8          | 3.71E-07 | 0.595197 | 0.929 | 0.688 | 0.006759 | CenC |
| LGALS3BP        | 3.73E-07 | 0.460458 | 0.857 | 0.505 | 0.00679  | CenC |
| SMPD1           | 3.75E-07 | 0.276404 | 0.536 | 0.168 | 0.006837 | CenC |
| AGPAT1          | 3.95E-07 | 0.266993 | 0.5   | 0.149 | 0.007199 | CenC |
| FAM210A         | 4.01E-07 | 0.273387 | 0.429 | 0.122 | 0.007297 | CenC |
| MARCKSL1        | 4.05E-07 | 0.49116  | 0.643 | 0.249 | 0.007379 | CenC |
| PTK7            | 4.09E-07 | 0.258529 | 0.393 | 0.104 | 0.007454 | CenC |
| FGFR1           | 4.22E-07 | 0.309298 | 0.464 | 0.126 | 0.007685 | CenC |
| VDAC2           | 4.69E-07 | 0.39456  | 1     | 0.886 | 0.008541 | CenC |
| HPCAL1          | 4.81E-07 | 0.326062 | 0.464 | 0.14  | 0.008765 | CenC |
| C17orf89        | 4.82E-07 | 0.442882 | 0.893 | 0.537 | 0.00878  | CenC |
| CDKN1B          | 5.02E-07 | 0.324498 | 0.607 | 0.215 | 0.009132 | CenC |
| HINT2           | 5.43E-07 | 0.546247 | 0.893 | 0.557 | 0.00988  | CenC |
| ACAP1           | 5.52E-07 | 0.302363 | 0.321 | 0.077 | 0.010044 | CenC |
| COX5A           | 6.57E-07 | 0.561706 | 0.929 | 0.862 | 0.011957 | CenC |
| MRPS6           | 6.62E-07 | 0.652065 | 0.821 | 0.588 | 0.012046 | CenC |
| NDUFS6          | 6.97E-07 | 0.516932 | 0.929 | 0.752 | 0.012694 | CenC |
| HIST2H2AC       | 7.05E-07 | 0.287257 | 0.429 | 0.122 | 0.01283  | CenC |
| SEPT8           | 7.14E-07 | 0.31904  | 0.321 | 0.078 | 0.013001 | CenC |
| HIF1A           | 7.15E-07 | 0.275045 | 0.5   | 0.16  | 0.013023 | CenC |
| WBP5            | 7.23E-07 | 0.457015 | 0.857 | 0.482 | 0.013167 | CenC |
| BCL6            | 7.54E-07 | 0.259534 | 0.286 | 0.062 | 0.013734 | CenC |
| CCDC107         | 7.55E-07 | 0.379587 | 0.5   | 0.161 | 0.013752 | CenC |
| NFE2L1          | 7.76E-07 | 0.4052   | 0.679 | 0.303 | 0.014138 | CenC |
| RPL17           | 8.10E-07 | 0.37587  | 1     | 0.985 | 0.014754 | CenC |
| MYL6            | 8.40E-07 | 0.320057 | 1     | 0.988 | 0.015293 | CenC |
| RPL3            | 8.83E-07 | 0.335406 | 1     | 0.999 | 0.016074 | CenC |
| KGFLP2          | 9.39E-07 | 0.419204 | 0.429 | 0.131 | 0.017103 | CenC |
| DUSP2           | 1.01E-06 | 0.415914 | 0.536 | 0.179 | 0.018322 | CenC |
| S100A13         | 1.05E-06 | 0.428858 | 0.964 | 0.615 | 0.019163 | CenC |
| NDUFA3          | 1.07E-06 | 0.518981 | 0.821 | 0.607 | 0.019443 | CenC |
| THBS1           | 1.18E-06 | 0.281112 | 0.536 | 0.176 | 0.021462 | CenC |
| RPSA            | 1.23E-06 | 0.493667 | 0.964 | 0.871 | 0.022325 | CenC |
| TRPT1           | 1.27E-06 | 0.391939 | 0.536 | 0.197 | 0.023138 | CenC |
| PRADC1          | 1.28E-06 | 0.372924 | 0.571 | 0.215 | 0.023392 | CenC |
| CCDC104         | 1.36E-06 | 0.46165  | 0.607 | 0.272 | 0.02485  | CenC |
| NUPR1           | 1.37E-06 | 1.332221 | 0.929 | 0.689 | 0.024992 | CenC |
| SYNGR1          | 1.41E-06 | 0.35145  | 0.679 | 0.262 | 0.025699 | CenC |
| CCDC23          | 1.43E-06 | 0.499279 | 0.643 | 0.291 | 0.025947 | CenC |
| ENSG00000198841 | 1.44E-06 | 0.515635 | 1     | 0.883 | 0.026201 | CenC |
| TIMM10          | 1.49E-06 | 0.4264   | 0.786 | 0.425 | 0.027106 | CenC |
| CD81            | 1.50E-06 | 0.451039 | 0.571 | 0.229 | 0.027312 | CenC |
| TCEB2           | 1.50E-06 | 0.392906 | 1     | 0.961 | 0.027395 | CenC |
| AMZ2P1          | 1.71E-06 | 0.308692 | 0.393 | 0.114 | 0.031184 | CenC |
| UQCRHL          | 1.87E-06 | 0.370887 | 0.464 | 0.161 | 0.033988 | CenC |
| CUTA            | 1.90E-06 | 0.44072  | 1     | 0.864 | 0.034601 | CenC |



|                |          |          |       |       |          |      |
|----------------|----------|----------|-------|-------|----------|------|
| NDUFA5         | 1.96E-06 | 0.45114  | 0.929 | 0.754 | 0.035767 | CenC |
| CHCHD2         | 1.97E-06 | 0.331941 | 1     | 0.982 | 0.035937 | CenC |
| ATPAF1         | 2.02E-06 | 0.459177 | 0.714 | 0.346 | 0.036768 | CenC |
| C9orf3         | 2.05E-06 | 0.416416 | 0.714 | 0.324 | 0.037315 | CenC |
| GSTM4          | 2.20E-06 | 0.426022 | 0.536 | 0.214 | 0.039998 | CenC |
| MZT2A          | 2.22E-06 | 0.479337 | 0.714 | 0.399 | 0.040403 | CenC |
| CTSL1          | 2.39E-06 | 0.725823 | 0.786 | 0.494 | 0.043442 | CenC |
| SRP14          | 2.39E-06 | 0.320695 | 1     | 0.991 | 0.043603 | CenC |
| EPB41L4A-AS1   | 2.40E-06 | 0.5063   | 0.821 | 0.525 | 0.043667 | CenC |
| SAV1           | 2.44E-06 | 0.263844 | 0.321 | 0.081 | 0.04443  | CenC |
| C19orf70       | 2.66E-06 | 0.477244 | 0.964 | 0.626 | 0.048408 | CenC |
| NBR1           | 2.71E-06 | 0.311028 | 0.571 | 0.212 | 0.04943  | CenC |
| PGM1           | 2.76E-06 | 0.42501  | 0.607 | 0.261 | 0.050286 | CenC |
| SCOC           | 2.77E-06 | 0.384559 | 0.929 | 0.521 | 0.050351 | CenC |
| SIGIRR         | 2.77E-06 | 0.474836 | 0.679 | 0.295 | 0.050404 | CenC |
| RABGGTB        | 2.83E-06 | 0.497028 | 0.714 | 0.365 | 0.051527 | CenC |
| HSP90AB1       | 3.05E-06 | 0.38657  | 1     | 0.963 | 0.055572 | CenC |
| C6orf48        | 3.11E-06 | 0.534898 | 0.893 | 0.651 | 0.056637 | CenC |
| SEC22C         | 3.16E-06 | 0.277624 | 0.5   | 0.164 | 0.057621 | CenC |
| IRF1           | 3.21E-06 | 0.361162 | 0.786 | 0.377 | 0.058445 | CenC |
| DNM2           | 3.48E-06 | 0.354954 | 0.464 | 0.161 | 0.063383 | CenC |
| COX14          | 3.73E-06 | 0.438068 | 0.929 | 0.759 | 0.067967 | CenC |
| GNB5           | 3.76E-06 | 0.375759 | 0.5   | 0.184 | 0.068547 | CenC |
| C17orf76-AS1   | 3.79E-06 | 0.405053 | 1     | 0.964 | 0.068954 | CenC |
| IL6ST          | 3.80E-06 | 0.253881 | 0.5   | 0.165 | 0.069116 | CenC |
| HNRNPA1        | 3.86E-06 | 0.391795 | 1     | 0.97  | 0.070262 | CenC |
| ZNF770         | 3.87E-06 | 0.306244 | 0.5   | 0.174 | 0.070395 | CenC |
| TXN2           | 3.93E-06 | 0.361578 | 0.893 | 0.563 | 0.071484 | CenC |
| EXT2           | 3.96E-06 | 0.271155 | 0.393 | 0.114 | 0.072052 | CenC |
| ATP5H          | 4.44E-06 | 0.433738 | 0.964 | 0.854 | 0.080897 | CenC |
| NDUFB11        | 5.05E-06 | 0.415415 | 0.964 | 0.784 | 0.09197  | CenC |
| PTGS2          | 5.09E-06 | 0.671188 | 0.393 | 0.122 | 0.092686 | CenC |
| MTHFD2L        | 5.84E-06 | 0.276696 | 0.571 | 0.223 | 0.106287 | CenC |
| CEBPD          | 5.86E-06 | 0.52854  | 0.893 | 0.602 | 0.106618 | CenC |
| CKS2           | 6.16E-06 | 0.496373 | 0.679 | 0.337 | 0.112173 | CenC |
| RPL22          | 6.94E-06 | 0.283709 | 1     | 0.994 | 0.126422 | CenC |
| RPPH1          | 7.05E-06 | 0.303445 | 0.429 | 0.136 | 0.12843  | CenC |
| CIAO1          | 7.21E-06 | 0.335832 | 0.607 | 0.254 | 0.131365 | CenC |
| FAM134A        | 7.46E-06 | 0.254647 | 0.607 | 0.233 | 0.13584  | CenC |
| WDTC1          | 7.74E-06 | 0.257356 | 0.286 | 0.069 | 0.140883 | CenC |
| NDRG2          | 7.98E-06 | 0.378307 | 0.714 | 0.357 | 0.145312 | CenC |
| ENSG0000019893 | 8.00E-06 | 0.363261 | 1     | 0.998 | 0.145673 | CenC |
| NDUFA8         | 8.02E-06 | 0.464127 | 0.857 | 0.578 | 0.145974 | CenC |
| GAS6           | 8.06E-06 | 0.270701 | 0.643 | 0.259 | 0.146686 | CenC |
| MRPL23         | 8.26E-06 | 0.36998  | 0.929 | 0.637 | 0.150396 | CenC |
| HAGH           | 8.97E-06 | 0.434386 | 0.75  | 0.452 | 0.163403 | CenC |
| NOL3           | 9.17E-06 | 0.422134 | 0.679 | 0.35  | 0.166963 | CenC |
| RPS26          | 9.37E-06 | 0.483402 | 1     | 0.943 | 0.170616 | CenC |

|           |          |          |       |       |          |      |
|-----------|----------|----------|-------|-------|----------|------|
| RAB13     | 9.76E-06 | 0.487042 | 0.857 | 0.592 | 0.177656 | CenC |
| NDUFC1    | 9.95E-06 | 0.478383 | 1     | 0.915 | 0.181113 | CenC |
| SLIRP     | 1.06E-05 | 0.41237  | 1     | 0.881 | 0.19311  | CenC |
| FAM84B    | 1.06E-05 | 0.380014 | 0.5   | 0.188 | 0.193787 | CenC |
| GHITM     | 1.10E-05 | 0.41546  | 0.964 | 0.854 | 0.199926 | CenC |
| TCEAL1    | 1.11E-05 | 0.302925 | 0.5   | 0.189 | 0.20204  | CenC |
| CD320     | 1.11E-05 | 0.277706 | 0.321 | 0.089 | 0.202449 | CenC |
| FKBP2     | 1.14E-05 | 0.416027 | 0.964 | 0.788 | 0.207006 | CenC |
| ADAR      | 1.29E-05 | 0.250393 | 0.321 | 0.091 | 0.235703 | CenC |
| UQCR10    | 1.30E-05 | 0.41691  | 1     | 0.903 | 0.235981 | CenC |
| CRABP2    | 1.33E-05 | 0.34717  | 0.679 | 0.285 | 0.242333 | CenC |
| SPRYD3    | 1.40E-05 | 0.302326 | 0.464 | 0.17  | 0.25447  | CenC |
| SMS       | 1.47E-05 | 0.608375 | 0.786 | 0.485 | 0.26685  | CenC |
| MRPL12    | 1.48E-05 | 0.524854 | 0.714 | 0.402 | 0.269709 | CenC |
| PLA2G16   | 1.49E-05 | 0.363656 | 0.5   | 0.191 | 0.271622 | CenC |
| ATP6V1A   | 1.52E-05 | 0.316175 | 0.429 | 0.153 | 0.276572 | CenC |
| BAG6      | 1.53E-05 | 0.296386 | 0.571 | 0.243 | 0.277835 | CenC |
| PURA      | 1.64E-05 | 0.285609 | 0.536 | 0.226 | 0.298527 | CenC |
| NDUFAF3   | 1.73E-05 | 0.414715 | 0.786 | 0.523 | 0.314307 | CenC |
| COA6      | 1.80E-05 | 0.343015 | 0.607 | 0.274 | 0.328415 | CenC |
| PFDN5     | 1.94E-05 | 0.313454 | 1     | 0.974 | 0.353176 | CenC |
| IFIT1     | 1.98E-05 | 0.454575 | 0.464 | 0.176 | 0.360994 | CenC |
| MTFP1     | 1.99E-05 | 0.260552 | 0.321 | 0.095 | 0.363059 | CenC |
| TOMM20    | 2.01E-05 | 0.459902 | 0.893 | 0.723 | 0.365828 | CenC |
| ZNF428    | 2.02E-05 | 0.425556 | 0.75  | 0.398 | 0.367157 | CenC |
| TMEM223   | 2.07E-05 | 0.281599 | 0.464 | 0.174 | 0.376044 | CenC |
| NDUFA11   | 2.11E-05 | 0.445748 | 0.929 | 0.875 | 0.384352 | CenC |
| EIF1AY    | 2.16E-05 | 0.653688 | 0.429 | 0.172 | 0.393375 | CenC |
| GGT7      | 2.29E-05 | 0.254791 | 0.357 | 0.104 | 0.417864 | CenC |
| ROMO1     | 2.30E-05 | 0.451475 | 0.964 | 0.782 | 0.41845  | CenC |
| NDUFS5    | 2.30E-05 | 0.387438 | 1     | 0.899 | 0.418734 | CenC |
| KCNQ1OT1  | 2.32E-05 | 0.347548 | 0.536 | 0.224 | 0.423165 | CenC |
| CISD1     | 2.35E-05 | 0.447385 | 0.714 | 0.386 | 0.427337 | CenC |
| OAZ2      | 2.35E-05 | 0.404377 | 0.786 | 0.444 | 0.42844  | CenC |
| MMP24-AS1 | 2.36E-05 | 0.338458 | 0.571 | 0.24  | 0.430173 | CenC |
| POLB      | 2.38E-05 | 0.262692 | 0.321 | 0.095 | 0.433384 | CenC |
| FAM115A   | 2.57E-05 | 0.28058  | 0.429 | 0.149 | 0.468647 | CenC |
| LSMD1     | 2.58E-05 | 0.421031 | 0.929 | 0.813 | 0.469209 | CenC |
| CCNL1     | 2.60E-05 | 0.458299 | 0.964 | 0.806 | 0.473744 | CenC |
| RPS19     | 2.64E-05 | 0.279873 | 1     | 0.998 | 0.481024 | CenC |
| MDK       | 2.72E-05 | 0.253288 | 0.679 | 0.284 | 0.495198 | CenC |
| MAP2K1    | 2.73E-05 | 0.351217 | 0.536 | 0.236 | 0.496413 | CenC |
| RPL37A    | 2.78E-05 | 0.385732 | 1     | 0.998 | 0.506164 | CenC |
| MYCL1     | 2.89E-05 | 0.292135 | 0.393 | 0.132 | 0.52668  | CenC |
| SDHD      | 2.94E-05 | 0.376469 | 0.893 | 0.69  | 0.534854 | CenC |
| PUM1      | 2.96E-05 | 0.25324  | 0.536 | 0.201 | 0.538271 | CenC |
| HSPE1     | 3.04E-05 | 0.359639 | 0.964 | 0.852 | 0.553521 | CenC |
| FAM200B   | 3.13E-05 | 0.40295  | 0.857 | 0.56  | 0.569406 | CenC |

|              |          |          |       |       |          |      |
|--------------|----------|----------|-------|-------|----------|------|
| HIGD1A       | 3.26E-05 | 0.37833  | 0.857 | 0.655 | 0.593015 | CenC |
| LRP1         | 3.30E-05 | 0.277385 | 0.607 | 0.253 | 0.601262 | CenC |
| ATP5C1       | 3.54E-05 | 0.431759 | 0.964 | 0.827 | 0.644049 | CenC |
| ZFAND5       | 3.80E-05 | 0.384085 | 0.929 | 0.664 | 0.692187 | CenC |
| APOO         | 3.98E-05 | 0.27704  | 0.5   | 0.197 | 0.723984 | CenC |
| NQO2         | 4.01E-05 | 0.2773   | 0.821 | 0.4   | 0.730352 | CenC |
| AK1          | 4.18E-05 | 0.359511 | 0.643 | 0.299 | 0.760983 | CenC |
| SMDT1        | 4.43E-05 | 0.359017 | 0.964 | 0.721 | 0.806149 | CenC |
| MAGED2       | 4.60E-05 | 0.373033 | 0.786 | 0.423 | 0.838084 | CenC |
| AKR1C3       | 4.77E-05 | 0.282646 | 0.357 | 0.117 | 0.868035 | CenC |
| PDE4D        | 4.80E-05 | 0.305118 | 0.321 | 0.101 | 0.873536 | CenC |
| BC009467     | 4.85E-05 | 0.274105 | 0.429 | 0.161 | 0.883977 | CenC |
| DHCR24       | 4.97E-05 | 0.413674 | 0.464 | 0.194 | 0.905735 | CenC |
| GOLGA8B      | 5.34E-05 | 0.259085 | 0.357 | 0.114 | 0.971412 | CenC |
| FLJ10038     | 5.55E-05 | 0.306555 | 0.607 | 0.274 | 1        | CenC |
| BOLA3        | 5.60E-05 | 0.397496 | 0.679 | 0.338 | 1        | CenC |
| PRDX3        | 5.73E-05 | 0.382639 | 0.821 | 0.47  | 1        | CenC |
| SLITRK4      | 5.73E-05 | 0.300071 | 0.607 | 0.28  | 1        | CenC |
| PTMS         | 5.76E-05 | 0.343689 | 0.893 | 0.541 | 1        | CenC |
| MTFR1L       | 5.83E-05 | 0.287427 | 0.607 | 0.278 | 1        | CenC |
| NCOA7        | 5.95E-05 | 0.304927 | 0.5   | 0.203 | 1        | CenC |
| ATP5J2       | 6.21E-05 | 0.371228 | 1     | 0.921 | 1        | CenC |
| RPL24        | 6.38E-05 | 0.284228 | 1     | 0.994 | 1        | CenC |
| MYL6B        | 6.84E-05 | 0.474229 | 0.75  | 0.453 | 1        | CenC |
| PSIP1        | 6.97E-05 | 0.314099 | 0.571 | 0.261 | 1        | CenC |
| MRPS9        | 7.20E-05 | 0.271241 | 0.607 | 0.277 | 1        | CenC |
| ETS2         | 7.21E-05 | 0.524911 | 0.643 | 0.358 | 1        | CenC |
| IDI1         | 7.33E-05 | 0.39116  | 0.75  | 0.476 | 1        | CenC |
| C12orf57     | 7.54E-05 | 0.390668 | 0.964 | 0.742 | 1        | CenC |
| MRPL34       | 7.63E-05 | 0.417594 | 0.821 | 0.517 | 1        | CenC |
| GCAT         | 7.78E-05 | 0.267642 | 0.393 | 0.142 | 1        | CenC |
| GAS5         | 7.83E-05 | 0.367788 | 1     | 0.934 | 1        | CenC |
| SOD1         | 8.36E-05 | 0.329742 | 1     | 0.9   | 1        | CenC |
| NDUFV1       | 8.49E-05 | 0.375106 | 0.821 | 0.578 | 1        | CenC |
| C7orf50      | 8.71E-05 | 0.413354 | 0.643 | 0.321 | 1        | CenC |
| ARRDC3       | 9.20E-05 | 0.307511 | 0.607 | 0.288 | 1        | CenC |
| SPTY2D1      | 9.21E-05 | 0.305584 | 0.357 | 0.123 | 1        | CenC |
| VKORC1       | 9.24E-05 | 0.340652 | 0.75  | 0.411 | 1        | CenC |
| FASN         | 9.24E-05 | 0.262451 | 0.286 | 0.087 | 1        | CenC |
| EID1         | 9.25E-05 | 0.418351 | 0.857 | 0.884 | 1        | CenC |
| IRF3         | 9.43E-05 | 0.27544  | 0.5   | 0.215 | 1        | CenC |
| LYRM4        | 9.43E-05 | 0.353359 | 0.607 | 0.323 | 1        | CenC |
| HNRNPL       | 9.49E-05 | 0.307168 | 0.5   | 0.222 | 1        | CenC |
| RPL5         | 9.91E-05 | 0.278194 | 1     | 0.993 | 1        | CenC |
| MTRNR2L8     | 0.000101 | 0.285493 | 0.357 | 0.128 | 1        | CenC |
| PTGR1        | 0.000102 | 0.285668 | 0.786 | 0.402 | 1        | CenC |
| LOC100505806 | 0.000105 | 0.273394 | 0.714 | 0.35  | 1        | CenC |
| TTC3         | 0.000105 | 0.2915   | 0.607 | 0.281 | 1        | CenC |

|           |          |          |       |       |        |
|-----------|----------|----------|-------|-------|--------|
| LAMTOR5   | 0.000106 | 0.377475 | 1     | 0.897 | 1 CenC |
| EEF2      | 0.000107 | 0.353525 | 1     | 0.874 | 1 CenC |
| ARHGEF3   | 0.000119 | 0.372405 | 0.714 | 0.355 | 1 CenC |
| SAT2      | 0.000125 | 0.458164 | 0.679 | 0.451 | 1 CenC |
| PIGH      | 0.000126 | 0.341345 | 0.607 | 0.322 | 1 CenC |
| HSPA9     | 0.000129 | 0.410495 | 0.857 | 0.668 | 1 CenC |
| BRD2      | 0.000133 | 0.380503 | 0.857 | 0.596 | 1 CenC |
| C11orf71  | 0.000139 | 0.297642 | 0.464 | 0.181 | 1 CenC |
| ARHGD1B   | 0.000146 | 0.427596 | 0.679 | 0.439 | 1 CenC |
| FLNA      | 0.000161 | 0.259959 | 0.393 | 0.147 | 1 CenC |
| CMC1      | 0.000161 | 0.253399 | 0.643 | 0.316 | 1 CenC |
| FDPS      | 0.000175 | 0.321569 | 0.857 | 0.514 | 1 CenC |
| SMIM11    | 0.000184 | 0.286674 | 0.571 | 0.268 | 1 CenC |
| NCBP2-AS2 | 0.000196 | 0.349157 | 0.75  | 0.488 | 1 CenC |
| ALDOA     | 0.000198 | 0.304503 | 1     | 0.978 | 1 CenC |
| CHID1     | 0.0002   | 0.25127  | 0.643 | 0.302 | 1 CenC |
| C9orf123  | 0.000204 | 0.386129 | 0.929 | 0.619 | 1 CenC |
| RPL36AL   | 0.000206 | 0.385776 | 0.964 | 0.955 | 1 CenC |
| CUTC      | 0.00021  | 0.277098 | 0.464 | 0.203 | 1 CenC |
| TRIM2     | 0.000215 | 0.293697 | 0.321 | 0.112 | 1 CenC |
| RBBP6     | 0.00022  | 0.323556 | 0.714 | 0.383 | 1 CenC |
| MRPL40    | 0.00022  | 0.316803 | 0.857 | 0.543 | 1 CenC |
| AURKAIP1  | 0.000222 | 0.318198 | 0.929 | 0.75  | 1 CenC |
| FCGRT     | 0.000247 | 0.330496 | 0.643 | 0.31  | 1 CenC |
| RNF5      | 0.000256 | 0.328787 | 0.714 | 0.439 | 1 CenC |
| PCYOX1    | 0.000257 | 0.277866 | 0.536 | 0.269 | 1 CenC |
| TFRC      | 0.000257 | 0.266028 | 0.429 | 0.177 | 1 CenC |
| SNHG16    | 0.000268 | 0.326722 | 0.821 | 0.512 | 1 CenC |
| ZSWIM7    | 0.000268 | 0.369027 | 0.643 | 0.364 | 1 CenC |
| ANKRD37   | 0.000274 | 0.510456 | 0.5   | 0.245 | 1 CenC |
| CANX      | 0.000287 | 0.409413 | 0.857 | 0.608 | 1 CenC |
| SPAG7     | 0.000295 | 0.352723 | 0.821 | 0.581 | 1 CenC |
| NEDD8     | 0.000306 | 0.275501 | 1     | 0.885 | 1 CenC |
| REST      | 0.000309 | 0.381786 | 0.571 | 0.29  | 1 CenC |
| BEX4      | 0.000315 | 0.28725  | 0.857 | 0.587 | 1 CenC |
| ETFB      | 0.000354 | 0.383225 | 0.821 | 0.7   | 1 CenC |
| SLC25A3   | 0.000354 | 0.296487 | 1     | 0.91  | 1 CenC |
| JUND      | 0.000358 | 0.355901 | 0.821 | 0.64  | 1 CenC |
| PDHA1     | 0.000364 | 0.285232 | 0.643 | 0.352 | 1 CenC |
| NDUFA12   | 0.000366 | 0.336037 | 0.857 | 0.782 | 1 CenC |
| LDHA      | 0.000375 | 0.282877 | 1     | 0.99  | 1 CenC |
| MRPL14    | 0.000403 | 0.37944  | 0.75  | 0.502 | 1 CenC |
| ATAD3C    | 0.000407 | 0.258595 | 0.393 | 0.161 | 1 CenC |
| TMEM100   | 0.000428 | 0.314    | 0.607 | 0.296 | 1 CenC |
| TSPYL2    | 0.000433 | 0.340709 | 0.5   | 0.244 | 1 CenC |
| TMEM14B   | 0.000438 | 0.281161 | 0.893 | 0.676 | 1 CenC |
| NUTF2     | 0.00044  | 0.255888 | 0.643 | 0.348 | 1 CenC |
| ESD       | 0.00045  | 0.353108 | 0.821 | 0.534 | 1 CenC |

|              |          |          |       |       |        |
|--------------|----------|----------|-------|-------|--------|
| JMJD6        | 0.00046  | 0.28282  | 0.571 | 0.296 | 1 CenC |
| PPIA         | 0.000467 | 0.307234 | 1     | 0.96  | 1 CenC |
| THAP7        | 0.000469 | 0.271877 | 0.536 | 0.261 | 1 CenC |
| HNRNPU       | 0.000477 | 0.32827  | 0.929 | 0.712 | 1 CenC |
| ATP6V1G1     | 0.000515 | 0.26338  | 1     | 0.965 | 1 CenC |
| IFT27        | 0.000542 | 0.321493 | 0.5   | 0.262 | 1 CenC |
| RPS21        | 0.0006   | 0.279396 | 1     | 0.99  | 1 CenC |
| MRPS36       | 0.000646 | 0.389268 | 0.714 | 0.539 | 1 CenC |
| HSPA8        | 0.000695 | 0.331867 | 0.964 | 0.792 | 1 CenC |
| COPRS        | 0.000732 | 0.292908 | 0.464 | 0.226 | 1 CenC |
| GADD45G      | 0.000736 | 0.269585 | 0.679 | 0.411 | 1 CenC |
| SLC25A1      | 0.000743 | 0.251038 | 0.5   | 0.25  | 1 CenC |
| SRSF9        | 0.000758 | 0.272947 | 0.964 | 0.833 | 1 CenC |
| MRPS21       | 0.000779 | 0.307125 | 0.929 | 0.759 | 1 CenC |
| COMTD1       | 0.000784 | 0.294289 | 0.571 | 0.292 | 1 CenC |
| MRPL2        | 0.000821 | 0.318242 | 0.571 | 0.319 | 1 CenC |
| EIF4B        | 0.000829 | 0.358478 | 0.714 | 0.491 | 1 CenC |
| NDN          | 0.000848 | 0.282823 | 0.607 | 0.335 | 1 CenC |
| COX8A        | 0.000857 | 0.340507 | 0.964 | 0.85  | 1 CenC |
| NINJ1        | 0.000858 | 0.318459 | 0.607 | 0.325 | 1 CenC |
| PLOD1        | 0.00087  | 0.269272 | 0.393 | 0.16  | 1 CenC |
| UQCRFS1      | 0.0009   | 0.336295 | 0.964 | 0.801 | 1 CenC |
| KLHDC8B      | 0.000922 | 0.272153 | 0.321 | 0.123 | 1 CenC |
| SNRPE        | 0.000938 | 0.273181 | 1     | 0.822 | 1 CenC |
| TRAPPC5      | 0.00098  | 0.373415 | 0.857 | 0.723 | 1 CenC |
| NFS1         | 0.00103  | 0.291161 | 0.357 | 0.159 | 1 CenC |
| GLO1         | 0.001039 | 0.270828 | 0.893 | 0.622 | 1 CenC |
| SSBP4        | 0.001057 | 0.258587 | 0.357 | 0.15  | 1 CenC |
| PHLDA1       | 0.001132 | 0.61648  | 0.429 | 0.207 | 1 CenC |
| MSS51        | 0.001143 | 0.268966 | 1     | 0.979 | 1 CenC |
| CSRNP1       | 0.001263 | 0.344482 | 0.643 | 0.416 | 1 CenC |
| MYLIP        | 0.001279 | 0.266305 | 0.607 | 0.352 | 1 CenC |
| FUNDC2       | 0.00132  | 0.275277 | 0.679 | 0.426 | 1 CenC |
| COA4         | 0.00133  | 0.264366 | 0.786 | 0.47  | 1 CenC |
| GABARAPL2    | 0.001332 | 0.27775  | 0.964 | 0.877 | 1 CenC |
| FKBPL        | 0.001359 | 0.273761 | 0.321 | 0.131 | 1 CenC |
| PIN1         | 0.001372 | 0.260012 | 0.786 | 0.509 | 1 CenC |
| TIPARP       | 0.001435 | 0.478564 | 0.607 | 0.378 | 1 CenC |
| MRPL20       | 0.001464 | 0.317067 | 0.929 | 0.753 | 1 CenC |
| FIS1         | 0.001491 | 0.345509 | 0.893 | 0.681 | 1 CenC |
| LOC100288911 | 0.001557 | 0.355797 | 0.429 | 0.201 | 1 CenC |
| SDHB         | 0.001591 | 0.354275 | 0.786 | 0.618 | 1 CenC |
| JTB          | 0.001744 | 0.302555 | 0.964 | 0.743 | 1 CenC |
| NHP2L1       | 0.001859 | 0.288509 | 0.929 | 0.833 | 1 CenC |
| NDUFA2       | 0.001891 | 0.327969 | 0.857 | 0.777 | 1 CenC |
| HERPUD1      | 0.001909 | 0.352132 | 0.929 | 0.942 | 1 CenC |
| TMEM107      | 0.001917 | 0.390894 | 0.5   | 0.285 | 1 CenC |
| AAMDC        | 0.001925 | 0.376748 | 0.679 | 0.415 | 1 CenC |

|           |          |          |       |       |        |
|-----------|----------|----------|-------|-------|--------|
| C19orf60  | 0.001969 | 0.314045 | 0.714 | 0.52  | 1 CenC |
| MOAP1     | 0.001978 | 0.256509 | 0.571 | 0.304 | 1 CenC |
| PLEKHA3   | 0.001998 | 0.310716 | 0.464 | 0.234 | 1 CenC |
| PELO      | 0.002276 | 0.389017 | 0.5   | 0.283 | 1 CenC |
| IL8       | 0.002316 | 0.59613  | 0.286 | 0.108 | 1 CenC |
| MRPS7     | 0.002534 | 0.2698   | 0.75  | 0.503 | 1 CenC |
| SETD5-AS1 | 0.002638 | 0.32034  | 0.5   | 0.27  | 1 CenC |
| RNF181    | 0.002648 | 0.334803 | 0.857 | 0.718 | 1 CenC |
| RNASEH2C  | 0.002761 | 0.269099 | 0.607 | 0.335 | 1 CenC |
| ALKBH7    | 0.002804 | 0.30123  | 0.929 | 0.656 | 1 CenC |
| NFKBIE    | 0.002992 | 0.255193 | 0.321 | 0.142 | 1 CenC |
| PPP1R10   | 0.003447 | 0.263097 | 0.5   | 0.279 | 1 CenC |
| NEDD4L    | 0.003709 | 0.253887 | 0.5   | 0.272 | 1 CenC |
| GADD45B   | 0.003908 | 0.268045 | 1     | 0.928 | 1 CenC |
| GRHPR     | 0.003992 | 0.321848 | 0.75  | 0.54  | 1 CenC |
| PNKD      | 0.004224 | 0.339356 | 0.821 | 0.746 | 1 CenC |
| WDR1      | 0.004412 | 0.333921 | 0.786 | 0.555 | 1 CenC |
| TUFM      | 0.004433 | 0.251027 | 0.893 | 0.751 | 1 CenC |
| ZFAS1     | 0.004501 | 0.297529 | 1     | 0.866 | 1 CenC |
| TUBB      | 0.004827 | 0.253765 | 0.929 | 0.828 | 1 CenC |
| CKB       | 0.004929 | 0.410882 | 0.607 | 0.355 | 1 CenC |
| 7SK-87    | 0.005131 | 0.548256 | 0.821 | 0.609 | 1 CenC |
| DARS      | 0.005392 | 0.373126 | 0.75  | 0.534 | 1 CenC |
| PRDX6     | 0.005535 | 0.254395 | 1     | 0.855 | 1 CenC |
| ECI2      | 0.00582  | 0.331668 | 0.679 | 0.439 | 1 CenC |
| TOMM5     | 0.006443 | 0.281451 | 0.857 | 0.724 | 1 CenC |
| CXCL2     | 0.006988 | 0.299158 | 0.464 | 0.235 | 1 CenC |
| GOLGB1    | 0.00857  | 0.262052 | 0.607 | 0.373 | 1 CenC |
| FUS       | 0.008951 | 0.2615   | 0.786 | 0.525 | 1 CenC |

**Molecular characteristics and spatial distribution of adult human corneal cell subtypes**

Ann J Ligocki, Wen Fury, Christian Gutierrez, Christina Adler, Tao Yang, Min Ni, Yu Bai, Yi Wei, Guillermo L Lehmann, Carmelo Romano

Supplementary Table 2. CA3, RGS5, and PDGFRB gene expression levels

Average UMI

| gene   | CenC     | LPC-1    | LPC-2    | Epi-B1   | Epi-B2   | Epi-T    | Epi-S1   | Epi-S2   | Epi-S3   | Conj-1   | Conj-2   | Conj-3   | Stro     | LC      | Mela | VEC      |
|--------|----------|----------|----------|----------|----------|----------|----------|----------|----------|----------|----------|----------|----------|---------|------|----------|
| CA3    | 59.3842  | 0.007257 | 0.008556 | 0.01023  | 0.004089 | 0.007236 | 0.004859 | 0.010335 | 0.008295 | 0.028764 | 0.02266  | 0.054414 | 0.007751 | 0.02422 | 0    | 0        |
| RGS5   | 17.77359 | 0.017267 | 0.01673  | 0.03779  | 0.03627  | 0.020661 | 0.033466 | 0.055378 | 0.040581 | 0.0282   | 0.026579 | 0.021474 | 0.021251 | 0       | 0    | 0.44411  |
| PDGFRB | 0.064965 | 0        | 0        | 0.006185 | 0        | 0        | 0.002378 | 0.000374 | 0.001348 | 0.000635 | 0        | 0        | 0.263109 | 0       | 0    | 1.019454 |
